# Supplementary material for: Nanoscale architecture and coordination of actin cores within the sealing zone of human osteoclasts
Source: eLife. 2022 Jun 21;11:e75610. doi: 10.7554/eLife.75610 (PMC9255968; doi:10.7554/eLife.75610)
Supplement: Figure 1—source data 1. [file elife-75610-fig1-data1.xlsx]

## Sheet: Feuil1
Data Fig1E-F and FigS2
Vinculin
18	7.5	16	22	29	20	54	53	23	38.5	33	62	50	92.5	58	51	43	37	42	26	20.5	32	35.5	19	15	14
26	66.5	33	22	22.5	33	30	19	28	43	50	47	68.5	61	28	13	40.5	30.5	31.5	5	60.5	22	42	25	30	25
59.5	48	27	55	29	29	34.5	22	32	27	33	51	43	51.5	25	47	45	23	70	44.5	61	63	71.5	49	56	44
55	57	60	57	36	39	51	75.5	58.5	53	40	52	55	77	67.5	65.5	64	61	57	63	73	72	65	58	46	34
14	31	29	35.5	26	27	34.5	27	32	38.5	36	57	21	27.5	43.5	29	38	35	43	39	23	46	31	29	29	23
45	51	51	60	56	63	63	54	65	54	56	53	78	65	56	61	52.5	47	61	54	61	65	48	56	41.5	40
61	59	68	69	76	67	66	76	73	63	56	55	63	66	77	65	65	70	61	60	52	67	63	61	60	50
62	55	54	65	65.5	65	75	53	65	58	63	63	67	43	64	58	50.5	47	56	64	74.5	72	65	43	35	48
55	55	52	57	54	57	55	54	57	58	59	67	71	57.5	60	52	56	57	59	53	58.5	55	53	52	51	45
30	30	43	31.5	30	29.5	37	38	62	52	56.5	92.5	85	70	49.5	47	32	37.5	35	34	27.5	31	40	30	34	33
66	40	52	54.5	60.5	57	63.5	56	64	63	70	64	67	66.5	68	47	50	55	63	65	69	58	66	60	54	48.5
TlnC
43	46	53	63	66	69	75	71	76	64	70	80.5	63	72.5	63	77	61	59.5	57	56	49	42	48	40	34	30
37	38	41	50	44	54	46	50	55	52.5	48	87	78	51	58	59.5	50	55	48	41	51	48	50	41	36	37
50	46	52	51	54	55	58	53	50	61	66	48	56.5	61	61	67	63	67	76	66	59	52	62	52	47	42
74	72	73	74	72	78	80	78	80	83	84	91	87.5	120	90.5	84	84	81	81	78	78	80	77.5	75	71	71
81	93	99	90	102	107	104	93	101	97	115	92	74	91	88	93	91	103	91	100	89	95.5	94	87	77	65
72	77	81	85.5	87	89	87	88	84	86.5	71	83	84	73	73	94	72	92	82	81	81	72	81	71	68	65
78	77	84	85	89	85	95.5	97	78	93	88	95	100.5	85	86	84	83	81	72	67	69	66	65	69	65	58
24	22	22	24	29	21	26	27	27	19	24	18	27	29	33.5	28	24	30	29	29	22	27	26	26	28	26
22	19	21	22	21	15	22	22	21	27	28	24	22	26	22	26	32	34	35	38	28	35	26	27	21	18
37	38	40	45	39.5	43	47	42	39	35	38	30	34	37.5	47	37	38	42	43	42	40	44	34	34	32	30
31	44	36	32	43	42	30	29	41	31	41	41	93	48	28.5	37	40	43	37	37	28	35	31	24	23	24
65.5	72	65	70	60	47	67.5	58	54	53	54	64	49	69	50	54	55	47	44	47	49	48	52	45	40	42
28	44	42	39	50	41	45	52	41	45	45	34	54	74	29	46	37	38	39	42	40	42	30	35	31.5	25
53	52	53	51	63	57	58	59	50	59.5	45	44	36	41	46	45	45	51	49	48	41	41	48	43	43	34
36	46	53.5	49	48	47	51	54	50	42	76.5	45.5	49.5	25	38	42	47	44	27	23	24	37.5	23	27	21	21
77	78	71	68	60	71	78	80	76.5	54	53.5	80.5	81	86	64	64	76	67	64	64	68	64	74	64	57	48
FlnA
													169,5
190	198	177	196	191	189	183	204	188	183	184.5	180	134	178.5	193.5	166	194	179	183	196	194	213	210.5	212.5	205	211.5
178	178	174	164	173.5	158	171	181	164	173.5	184	166	182.5	165	169	170.5	169	169	173	156	175	192	177	184	194	199
194	180	161	184	191	177	164	144	175	145	156	173	182	154	178	181	156.5	152.5	172.5	189.5	197.5	176	186	199	204.5	194
190	183	180	168	174	158	159	147.5	164.5	153	178.5	154	165	140	146.5	174	173	161	166	189	159	170	166	163	165	162
174	195	192	185	196	192	188	185	194.5	191	192	194	190	176	196	197	194	222	211	199	222	213.5	202.5	204	198	208
193	192	185	199	200	196	197	179	180	167	184	164	142	164	151	170	186	216	203	201	187	185	185	186	188	177
190	196	192	187	192	190	174	189.5	186	194	185	185	187	164	184.5	173	204.5	183	214	212	210	216	213	207.5	204	206
188	192	191	191	196	187	189	188	202	186	194	194	201	195	199	193	206.5	207	211	195	211	211.5	211	204	205	208.5
205	190	194	184	174	138	183	189	207	153	235.5	224	147	195.5	178	166	200	207	205	237	183.5	169	189	205	179.5	206
208	196	191	194	240.5	272	198.5	155	213	161	202.5	174.5	274	194	184.5	215	226	232	227	205	232	192	184	206	227	193.5
200	159	166.5	160	185.5	143.5	201.5	227	204.5	197.5	215	178	152	192	143	193.5	214	204	205	216	189	222	274	210	269	222.5
204	136	194	262	215	191.5	210.5	206	200	159.5	183	211.5	250.5	147	175	200.5	196	201	207	195	215	202.5	214.5	193	220.5	200
171	162	162	159	192.5	185	151.5	159.5	165	160	172	151	146	144	165	134.5	134	150	142	162.5	169	161	149	165	157	149
172	212	186	188	180	161.5	150	206.5	179.5	187.5	157.5	225	205.5	171	171.5	172	154	166.5	184	201	205.5	159	158	218	201	205
164	180.5	204	150	155	157.5	204	205	178	166	158	157.5	163.5	159.5	168	138.5	184.5	171	203	170.5	175.5	241	192	170	191	182
53	65	85	97	97	102	98	113	124	106	115	118	120	126	111	109	109	104	101.5	103	87	83	71	71	64	57
79.5	78	95	100	99	99	115	116	111	103	112.5	92.5	101	108	92	104	97	93	91	86	86	75	65	60	54	44
37	40	46	66	56	76.5	108	105	104.5	105	107.5	111	89.5	76	75	91	97	73	63	60	65	48	58	57	39	28
70	61	57	55	65	88	70	92	84	114	85	116	110	123	124.5	121	97	105.5	71	60	64	46	34	40	35	27
74	107	89	113	117	88	90.5	95	92	87	113	110	124	133	133.5	95	107	97	101.5	112	80	80	78	69	51	57
109	118	93	92.5	97.5	113	100	105.5	131.5	104	117.5	97	101	120	115	113.5	126.5	138.5	104	75	64	65.5	90	47	40	44
101	120	119	113	127	123	133	96	103	136	82	94.5	127	83	119	110	131	131	97	109.5	89	98	101.5	74	45	32
115	124	107.5	123	119	111	117	98	120	131	123	96	116	131	110	97	100	124	115	99	102	114	118.5	104	97	88
Pax
36.5	15.5	47	47	37.5	67	43	71	29	43	48	28	26.5	-8	43	49.5	17	23	14	12	18	15	18	19	19	30
35	32	42	48	43	28	43.5	24	31	37	30	19.5	115	40	54	26	34	28	25	28	26	38	38	25	25	28.5
16	17	15	18.5	23	17	13	26	16	6.5	12	7	19	17	9	24	14	11	10	22	14	9	20	13	12	10
29	24	38	26	44	35	30.5	39	35	30	17	15	82.5	28	28	27.5	41	33	37	30	28	21	28	26	25	24
41	33.5	29	69	75.5	28.5	18	27.5	18	22	47	109			6.5	38	25	19.5	16	22	37	26	33	36	38.5	9
28.5	27.5	20	19	32.5	17.5	14	13	33	6	11	18	-7	29	27	1	5	22	18	14	33	33	12	23	15	19
13	37	25	7	10	14.5	1	9	58	20	11	17	122	10	11.5	14	23	10	19	27.5	14	10	9	14	15	28
68	68	75	61.5	87.5	78	79	68	83	77	84	76.5	40.5	73	79.5	63	63	65	56	61	60	76	68	67	66	70
78	82	80	75	75	101	117	78	76	92	80	78	79.5	91	79	74	71	82	78	83	72	71	76	68	76	66
57.5	50	52	50.5	43	34	62	38	26	57	63.5	26	51	35	32	42.5	45	41	50	74	39.5	60	54.5	47	46.5	34
57	72	88	80	65	94.5	127.5	100	76.5	80	112	107	74	90	80	54	76	55	69	76	46	52	50	63	49.5	46
Cort
136	137.5	159	171.5	162	165	191	117	184	146	164	164.5	165	172	159	152	162	147	190	147	163.5	145	174	171.5	168	159
185.5	178	179.5	175	165.5	153	171.5	178	178	147	192	181.5	177	165	174	175	184.5	178	168	207	239	175	178.5	169	154	156
213.5	146	187	203.5	297	211	182	165.5	177.5	163	163	166	173	181	175	183.5	168	126.5	133	146.5	130	163	166	187	161	174.5
172	171	172	181.5	172	181	198	159	154	194.5	163	175.5	154	159	160.5	178	192.5	172.5	175	159	182	157	153	176.5	188.5	175.5
213	192	187	192	199.5	191	200	190.5	192	200	195	194	186	185	192	189	187	179.5	198	205.5	194	202	210	199	212	215
192	196	190	190	181.5	190	180.5	177	182.5	183	178	166	163	165	161	169	163	157.5	176	185	190	201	180	200	201	197
199	185	185	185	184	185	187	173	175	183	181.5	172	172	166	165	164	162.5	164.5	175	184	180	176.5	188	185	199	198
215	177	155	175	157.5	158	152	160	160	180	186.5	199	197	186.5	192	214	175	234	216	219.5	215	210	203	214	237.5	235
189	183	188	182	181	179	184	177	176	184	188	179	178	173	173	165	167	170	166	172	178	177	174	181	186	194
191	199	209	177	177	137.5	194	178	158.5	173.5	177.5	163	157	158	153	164	156	178.5	206	165	165	163	166	177	197	193
220	217	222	212	216	211	208	212	204	210	213	214	213	209	204	208	213	217	204	211	215	216	205	213	222	222
191	170	168	159	159	144	149.5	151	177	179	174	180	188	186.5	189	187	175	198.5	190	200	195	203	194	220	229	236
204	199	185	186	176	161	163	152	166	164.5	165.5	177	178	177	184	187	185	189	196	191	187	196	189.5	185	188	193
204	191	194	171.5	172	170	189	169.5	171	171	171	173	168	165	164	164	160	168.5	164	170	170	191	182	184	187.5	189
250	232	216	236	256.5	237	267.5	222	196	179	194.5	183	176	183	206.5	198	189	179	201.5	182	248	252	225	213	193	190
229.5	231.5	221.5	265	248.5	167	237	157	192.5	203	166	171	182	192.5	194	200	201	218	244	250	217	247.5	184	212.5	233	232.5
258	257	246	235	222	217.5	181	240	229	211.5	218.5	211.5	201	198	197.5	200	216.5	228	226	251	288	237.5	242	239.5	264	226
224	200.5	215.5	228.5	230.5	191	217.5	208.5	223	203	188.5	190	201	194	174.5	207	231.5	210.5	212	225	211.5	191.5	201	213	212	215
41	41	59	78	65	67	77.5	91	86	98.5	91	83	88.5	86.5	98	107.5	93	95	93	86	89	76	86	66	61	63
70	63	75	91	71	86	82	99	90	86	92.5	93	98	97	104	96	93	78.5	67	71	56	53	52.5	41	27	23
94	112	106	109.5	117	120	107	112	108	99	108.5	111	110	114	104	99.5	97	103	102	117	114.5	104	104	103	90	93
74	77	87	89	101	99	106	108	107	101	106.5	92	120	102.5	112	100	100	93	92.5	79	83.5	82	64.5	69.5	62	51
64.5	67	67.5	70	82.5	86	79	93	96	97	103	101	114	101	91	88	79	81	85	68	65	58.5	68	60	55	52
50	39	49	56	32	43	63	75	93	86	111	92	111	118	122.5	117	98.5	74.5	94	76.5	45	31.5	29	16	20	31
38	29	20	26	68	59	73	84	60	77	84.5	99.5	101	102	97	88	69	61	59	51	40	23	28	25	27	20
47	52	78	92.5	93	91	97	83	114.5	88.5	92	94	108	108	117	98	103	91	94	106	91	85	97	77	61	52
58	67	81	95	81	90	87	81.5	97	84.5	107	105.5	102	103	121	109	100	90	99.5	84	72	90	68	69	62	66
53	58	61	68.5	67.5	80.5	66.5	73	57	82.5	87	82	82.5	87	85	61	60	62	48	49	60.5	38	30	32	21	21
64	72	72	87	106	82	82	85	94	91	108	90	95	94	95	81	82	93	81.5	84	70.5	75	81	59	55	53
Actinin
176	197	212	190.5	174	165	200	207.5	175	179	152	145	159	163	181	148	154	187	189	210.5	244.5	195	209	211	202.5	199
159	145	169	159	170	180.5	153.5	166	151	121	140	146	136	135	122	158	135	151	156	171.5	164	187	156	161.5	192	200
205	201	187	228.5	189	159.5	179	201	187	176	174.5	156	128	123	151	161	187	234	187	184	192	172	191	202	192	191
255	240.5	241	229.5	225	207	197	196	179	163	163	144	144	128	165.5	143	187	173.5	169	177	203	164	227.5	201	215	134.5
224	214	214	211	192	200	212	223	203	222	198.5	192	183	199	196	205	199	182	203.5	203	220	217	232	204	216	206
213.5	217	216.5	205	212	198	196	204	191	179	193.5	168	176	162	201	186	188	184	194	201	189.5	176.5	205	205.5	220	221.5
253	137	157	181	192.5	124	176	144	128	172	147	129	139	145.5	163	163.5	177	181	189	189	212	143	191.5	227.5	221	206
160	160.5	194	161	157	130	144	209	218	214.5	181	158.5	173	178	173	183	202.5	161	202	181	198	241	218	160	209.5	221
150	150	168.5	154	142	159.5	179	155.5	171	205	186	143	159	195	167	206	140	122	183	168	174.5	164	224	197	166.5	186
141	164	162	170.5	152.5	138	182	145	145	165	146	153	151	154	146	174	168.5	180.5	202	165	191	194.5	171	148	171	181
183.5	154	191	204	159	183	126.5	172	182	159	158.5	168	156	158	177.5	163.5	202.5	175	224	159	162	158	166.5	192	186	173
163	179	150.5	170	193.5	207	204	180	185	192	223.5	160	171	197	171	190	223	203	149.5	162	150.5	200	178	192	146	199
67	93	111	97	106.5	75	127.5	120	83	100	102.5	88	117	93	94.5	90	94	62.5	78.5	83.5	98	76	102	50	36	30
33	26	29	26	36.5	53.5	38	36	61	78	78	77	88	86	93	73	86.5	72	64	53	70.5	62	56	43	40	31
80	99	91	116	91	86	123	109	95	110	106	102	124	107	116	96	108	102	107	87	139	90	103	78	63	73
30	50	87.5	101.5	67	103.5	102	54	107	91.5	97	95	113	109.5	90	117	87	75	57	84.5	85.5	99.5	55	77	64	58
73	75	81	69.5	62.5	94	84	94	96	116	92	99	104	106	99	102	83	102	94	60	64	81.5	64	64	57	55
69	88	99	91.5	101	129	123	117	116	106	100.5	130.5	113	109.5	100	100	112	107	102	103	119	107	97	100	83	78
87	93	91	111	108	95	93	102	122.5	134	93	116	99	122.5	93	100	109	116.5	106	113	114	93	110	93	85	64
54	104	112	117	124.5	94	108	131	116	100	98	95	103	110	112	112	84	103	96	83	87	95	112	86	68.5	50
65	61	93	70	98	93	77.5	99.5	101.5	93	90.5	96	97	104	107.5	102	117.5	104	93	82	77	93	86.5	86	65	54
F-actin
71.5	67	81	85	88	79	84	94.5	80	96	85	88	89	79	81.5	88.5	89	88	89	84.5	81	78	82	85	92	85
91	91	80	76	70	74.5	79	75	83.5	76	69	82	83	79	83	85.5	96	88	97	103	89	93	85	66	52	109
47	47	55	65	65	64	68	74	70	73	79	82	83	80	78	80	79	79	69.5	70	69	65	59	48	37	33
97	90	73	77	80	77	84	109	104	102	107	109	113	112	113	110	112	108	87	84	87	90	80	88.5	84	81
84	89	93	110	114	110	113	111	111	114	119	118	120	117	111	102	96	93	84	76	73	69	69	55	49	41
