# Supplementary material for: Nanoscale architecture and coordination of actin cores within the sealing zone of human osteoclasts
Source: eLife. 2022 Jun 21;11:e75610. doi: 10.7554/eLife.75610 (PMC9255968; doi:10.7554/eLife.75610)
Supplement: Figure 1—source data 2. [file elife-75610-fig1-data2.xlsx]

## Sheet: R F-act
RHistfull1 Act
		Data	to	plot	the	line	corresponding	to	r	histogram	:	x	=	middle	of	bin,	y	=	nb	of	molecules		sum	proportion	max
	-2490	2704																					699467	0.0038658	0.00649495
	-2470	2756																						0.00394014
	-2450	2733																						0.00390726
	-2430	2861																						0.00409026
	-2410	2816																						0.00402592
	-2390	2821																						0.00403307
	-2370	2839																						0.0040588
	-2350	2905																						0.00415316
	-2330	2871																						0.00410455
	-2310	2936																						0.00419748
	-2290	3094																						0.00442337
	-2270	3098																						0.00442909
	-2250	3121																						0.00446197
	-2230	3235																						0.00462495
	-2210	3292																						0.00470644
	-2190	3091																						0.00441908
	-2170	3046																						0.00435474
	-2150	3009																						0.00430185
	-2130	2954																						0.00422322
	-2110	2944																						0.00420892
	-2090	2894																						0.00413744
	-2070	2919																						0.00417318
	-2050	2955																						0.00422465
	-2030	2939																						0.00420177
	-2010	2897																						0.00414173
	-1990	2903																						0.0041503
	-1970	2781																						0.00397588
	-1950	2869																						0.00410169
	-1930	2762																						0.00394872
	-1910	2793																						0.00399304
	-1890	2795																						0.0039959
	-1870	2778																						0.0039716
	-1850	2752																						0.00393442
	-1830	2641																						0.00377573
	-1810	2662																						0.00380575
	-1790	2551																						0.00364706
	-1770	2625																						0.00375286
	-1750	2648																						0.00378574
	-1730	2546																						0.00363991
	-1710	2524																						0.00360846
	-1690	2530																						0.00361704
	-1670	2549																						0.0036442
	-1650	2665																						0.00381004
	-1630	2521																						0.00360417
	-1610	2652																						0.00379146
	-1590	2593																						0.00370711
	-1570	2656																						0.00379718
	-1550	2767																						0.00395587
	-1530	2572																						0.00367709
	-1510	2551																						0.00364706
	-1490	2633																						0.00376429
	-1470	2622																						0.00374857
	-1450	2600																						0.00371712
	-1430	2642																						0.00377716
	-1410	2727																						0.00389868
	-1390	2687																						0.0038415
	-1370	2644																						0.00378002
	-1350	2702																						0.00386294
	-1330	2602																						0.00371998
	-1310	2634																						0.00376572
	-1290	2467																						0.00352697
	-1270	2432																						0.00347693
	-1250	2493																						0.00356414
	-1230	2549																						0.0036442
	-1210	2608																						0.00372855
	-1190	2547																						0.00364134
	-1170	2601																						0.00371855
	-1150	2472																						0.00353412
	-1130	2477																						0.00354127
	-1110	2591																						0.00370425
	-1090	2566																						0.00366851
	-1070	2572																						0.00367709
	-1050	2416																						0.00345406
	-1030	2515																						0.00359559
	-1010	2342																						0.00334826
	-990	2375																						0.00339544
	-970	2393																						0.00342118
	-950	2383																						0.00340688
	-930	2330																						0.00333111
	-910	2395																						0.00342404
	-890	2286																						0.0032682
	-870	2369																						0.00338686
	-850	2402																						0.00343404
	-830	2321																						0.00331824
	-810	2315																						0.00330966
	-790	2343																						0.00334969
	-770	2412																						0.00344834
	-750	2428																						0.00347121
	-730	2364																						0.00337972
	-710	2299																						0.00328679
	-690	2248																						0.00321388
	-670	2226																						0.00318242
	-650	2099																						0.00300086
	-630	2085																						0.00298084
	-610	2096																						0.00299657
	-590	2062																						0.00294796
	-570	2207																						0.00315526
	-550	2149																						0.00307234
	-530	2153																						0.00307806
	-510	2129																						0.00304375
	-490	2189																						0.00312953
	-470	2222																						0.0031767
	-450	2157																						0.00308378
	-430	2224																						0.00317956
	-410	2293																						0.00327821
	-390	2359																						0.00337257
	-370	2426																						0.00346836
	-350	2524																						0.00360846
	-330	2613																						0.0037357
	-310	2703																						0.00386437
	-290	2854																						0.00408025
	-270	2974																						0.00425181
	-250	3153																						0.00450772
	-230	3237																						0.00462781
	-210	3415																						0.00488229
	-190	3603																						0.00515107
	-170	3777																						0.00539983
	-150	3921																						0.0056057
	-130	4038																						0.00577297
	-110	4081																						0.00583444
	-90	4272																						0.00610751
	-70	4363																						0.00623761
	-50	4407																						0.00630051
	-30	4543																						0.00649495
	-10	4490																						0.00641917
	10	4404																						0.00629622
	30	4297																						0.00614325
	50	4073																						0.00582301
	70	4080																						0.00583301
	90	4045																						0.00578297
	110	3883																						0.00555137
	130	3913																						0.00559426
	150	3540																						0.005061
	170	3443																						0.00492232
	190	3201																						0.00457634
	210	3202																						0.00457777
	230	3030																						0.00433187
	250	2903																						0.0041503
	270	2816																						0.00402592
	290	2654																						0.00379432
	310	2666																						0.00381147
	330	2521																						0.00360417
	350	2505																						0.0035813
	370	2554																						0.00365135
	390	2453																						0.00350696
	410	2394																						0.00342261
	430	2386																						0.00341117
	450	2309																						0.00330108
	470	2351																						0.00336113
	490	2383																						0.00340688
	510	2250																						0.00321674
	530	2379																						0.00340116
	550	2359																						0.00337257
	570	2358																						0.00337114
	590	2418																						0.00345692
	610	2336																						0.00333969
	630	2329																						0.00332968
	650	2397																						0.0034269
	670	2393																						0.00342118
	690	2443																						0.00349266
	710	2418																						0.00345692
	730	2554																						0.00365135
	750	2434																						0.00347979
	770	2490																						0.00355985
	790	2599																						0.00371569
	810	2671																						0.00381862
	830	2800																						0.00400305
	850	2846																						0.00406881
	870	2939																						0.00420177
	890	2751																						0.00393299
	910	2776																						0.00396874
	930	2691																						0.00384722
	950	2704																						0.0038658
	970	2716																						0.00388296
	990	2788																						0.00398589
	1010	2654																						0.00379432
	1030	2717																						0.00388439
	1050	2743																						0.00392156
	1070	2747																						0.00392728
	1090	2792																						0.00399161
	1110	2841																						0.00406166
	1130	2737																						0.00391298
	1150	2727																						0.00389868
	1170	2669																						0.00381576
	1190	2720																						0.00388868
	1210	2695																						0.00385293
	1230	2810																						0.00401734
	1250	2814																						0.00402306
	1270	2783																						0.00397874
	1290	2785																						0.0039816
	1310	2921																						0.00417604
	1330	2950																						0.0042175
	1350	2999																						0.00428755
	1370	2985																						0.00426754
	1390	2934																						0.00419462
	1410	2935																						0.00419605
	1430	2941																						0.00420463
	1450	2916																						0.00416889
	1470	3064																						0.00438048
	1490	2955																						0.00422465
	1510	3183																						0.00455061
	1530	3110																						0.00444624
	1550	3085																						0.0044105
	1570	3278																						0.00468643
	1590	3223																						0.00460779
	1610	3217																						0.00459922
	1630	3037																						0.00434188
	1650	3168																						0.00452916
	1670	3052																						0.00436332
	1690	2972																						0.00424895
	1710	2922																						0.00417747
	1730	2966																						0.00424037
	1750	3024																						0.00432329
	1770	3023																						0.00432186
	1790	2987																						0.00427039
	1810	3043																						0.00435046
	1830	2973																						0.00425038
	1850	3006																						0.00429756
	1870	2973																						0.00425038
	1890	2985																						0.00426754
	1910	2739																						0.00391584
	1930	2844																						0.00406595
	1950	2958																						0.00422893
	1970	2899																						0.00414458
	1990	2768																						0.0039573
	2010	2813																						0.00402163
	2030	2721																						0.0038901
	2050	2791																						0.00399018
	2070	2825																						0.00403879
	2090	2702																						0.00386294
	2110	2789																						0.00398732
	2130	2595																						0.00370997
	2150	2562																						0.00366279
	2170	2731																						0.0039044
	2190	2691																						0.00384722
	2210	2706																						0.00386866
	2230	2997																						0.00428469
	2250	2921																						0.00417604
	2270	2797																						0.00399876
	2290	2898																						0.00414315
	2310	2743																						0.00392156
	2330	2881																						0.00411885
	2350	2934																						0.00419462
	2370	2786																						0.00398303
	2390	2683																						0.00383578
	2410	2698																						0.00385722
	2430	2857																						0.00408454
	2450	2676																						0.00382577
	2470	2624																						0.00375143
	2490	2668																						0.00381433

## Sheet: R Cort
RHistfull1 Cort
	#	Data	to	plot	the	line	corresponding	to	r	histogram	:	x	=	middle	of	bin,	y	=	nb	of	molecules		sum	proportion	max
	-2490	2180																					862194	0.00252843	0.0127477
	-2470	2154																						0.00249828
	-2450	2043																						0.00236954
	-2430	2065																						0.00239505
	-2410	2165																						0.00251104
	-2390	2171																						0.00251799
	-2370	2189																						0.00253887
	-2350	2150																						0.00249364
	-2330	2246																						0.00260498
	-2310	2202																						0.00255395
	-2290	2090																						0.00242405
	-2270	2080																						0.00241245
	-2250	2150																						0.00249364
	-2230	2187																						0.00253655
	-2210	2044																						0.0023707
	-2190	2146																						0.002489
	-2170	2256																						0.00261658
	-2150	2136																						0.0024774
	-2130	2040																						0.00236606
	-2110	2153																						0.00249712
	-2090	2142																						0.00248436
	-2070	2180																						0.00252843
	-2050	2316																						0.00268617
	-2030	2308																						0.00267689
	-2010	2226																						0.00258179
	-1990	2132																						0.00247276
	-1970	2095																						0.00242985
	-1950	2260																						0.00262122
	-1930	2313																						0.00268269
	-1910	2103																						0.00243913
	-1890	2205																						0.00255743
	-1870	2352																						0.00272792
	-1850	2428																						0.00281607
	-1830	2553																						0.00296105
	-1810	2588																						0.00300164
	-1790	2522																						0.0029251
	-1770	2350																						0.0027256
	-1750	2439																						0.00282883
	-1730	2623																						0.00304224
	-1710	2510																						0.00291118
	-1690	2419																						0.00280563
	-1670	2488																						0.00288566
	-1650	2532																						0.00293669
	-1630	2656																						0.00308051
	-1610	2711																						0.0031443
	-1590	2778																						0.00322201
	-1570	2701																						0.00313271
	-1550	2759																						0.00319998
	-1530	2731																						0.0031675
	-1510	2645																						0.00306776
	-1490	2599																						0.0030144
	-1470	2707																						0.00313966
	-1450	2665																						0.00309095
	-1430	2611																						0.00302832
	-1410	2667																						0.00309327
	-1390	2779																						0.00322317
	-1370	2948																						0.00341918
	-1350	3011																						0.00349225
	-1330	2922																						0.00338903
	-1310	3054																						0.00354213
	-1290	2968																						0.00344238
	-1270	2890																						0.00335191
	-1250	3000																						0.0034795
	-1230	3109																						0.00360592
	-1210	3054																						0.00354213
	-1190	3098																						0.00359316
	-1170	2931																						0.00339947
	-1150	2911																						0.00337627
	-1130	2847																						0.00330204
	-1110	2918																						0.00338439
	-1090	2920																						0.00338671
	-1070	2800																						0.00324753
	-1050	2884																						0.00334495
	-1030	2670																						0.00309675
	-1010	2766																						0.00320809
	-990	2648																						0.00307123
	-970	2756																						0.0031965
	-950	2679																						0.00310719
	-930	2711																						0.0031443
	-910	2627																						0.00304688
	-890	2691																						0.00312111
	-870	2651																						0.00307471
	-850	2596																						0.00301092
	-830	2513																						0.00291466
	-810	2523																						0.00292626
	-790	2402																						0.00278592
	-770	2331																						0.00270357
	-750	2469																						0.00286362
	-730	2271																						0.00263398
	-710	2225																						0.00258063
	-690	2233																						0.0025899
	-670	2200																						0.00255163
	-650	2303																						0.00267109
	-630	2204																						0.00255627
	-610	2148																						0.00249132
	-590	2110																						0.00244725
	-570	2162																						0.00250756
	-550	2197																						0.00254815
	-530	2394																						0.00277664
	-510	2311																						0.00268037
	-490	2382																						0.00276272
	-470	2375																						0.0027546
	-450	2589																						0.0030028
	-430	2869																						0.00332756
	-410	2939																						0.00340875
	-390	3179																						0.00368711
	-370	3300																						0.00382744
	-350	3429																						0.00397706
	-330	3776																						0.00437952
	-310	4220																						0.00489449
	-290	4587																						0.00532015
	-270	4970																						0.00576436
	-250	5749																						0.00666787
	-230	6167																						0.00715268
	-210	6605																						0.00766069
	-190	7362																						0.00853868
	-170	7914																						0.00917891
	-150	8571																						0.00994092
	-130	9189																						0.0106577
	-110	9631																						0.0111703
	-90	9889																						0.0114696
	-70	10335																						0.0119869
	-50	10708																						0.0124195
	-30	10991																						0.0127477
	-10	10888																						0.0126282
	10	10754																						0.0124728
	30	10951																						0.0127013
	50	10805																						0.012532
	70	10427																						0.0120936
	90	10112																						0.0117282
	110	9652																						0.0111947
	130	9059																						0.0105069
	150	8469																						0.00982262
	170	7715																						0.0089481
	190	7159																						0.00830324
	210	6470																						0.00750411
	230	5830																						0.00676182
	250	5547																						0.00643359
	270	5166																						0.00599169
	290	4733																						0.00548948
	310	4353																						0.00504875
	330	3761																						0.00436213
	350	3664																						0.00424962
	370	3420																						0.00396662
	390	3214																						0.0037277
	410	3020																						0.00350269
	430	2836																						0.00328928
	450	2724																						0.00315938
	470	2592																						0.00300628
	490	2562																						0.00297149
	510	2461																						0.00285435
	530	2434																						0.00282303
	550	2420																						0.00280679
	570	2696																						0.00312691
	590	2525																						0.00292858
	610	2427																						0.00281491
	630	2480																						0.00287638
	650	2484																						0.00288102
	670	2614																						0.0030318
	690	2479																						0.00287522
	710	2449																						0.00284043
	730	2425																						0.00281259
	750	2509																						0.00291002
	770	2572																						0.00298309
	790	2493																						0.00289146
	810	2696																						0.00312691
	830	2694																						0.00312459
	850	2707																						0.00313966
	870	2665																						0.00309095
	890	2730																						0.00316634
	910	2819																						0.00326957
	930	2908																						0.00337279
	950	2847																						0.00330204
	970	2851																						0.00330668
	990	2926																						0.00339367
	1010	3149																						0.00365231
	1030	3059																						0.00354793
	1050	3019																						0.00350153
	1070	2951																						0.00342266
	1090	2930																						0.00339831
	1110	2985																						0.0034621
	1130	2801																						0.00324869
	1150	2963																						0.00343658
	1170	2935																						0.00340411
	1190	3101																						0.00359664
	1210	3035																						0.00352009
	1230	3262																						0.00378337
	1250	3306																						0.0038344
	1270	3343																						0.00387732
	1290	3249																						0.00376829
	1310	3247																						0.00376597
	1330	3375																						0.00391443
	1350	3571																						0.00414176
	1370	3474																						0.00402926
	1390	3414																						0.00395967
	1410	3391																						0.00393299
	1430	3426																						0.00397358
	1450	3243																						0.00376133
	1470	3275																						0.00379845
	1490	3294																						0.00382049
	1510	3413																						0.00395851
	1530	3243																						0.00376133
	1550	3313																						0.00384252
	1570	3247																						0.00376597
	1590	3170																						0.00367667
	1610	3302																						0.00382976
	1630	3415																						0.00396083
	1650	3464																						0.00401766
	1670	3143																						0.00364535
	1690	3389																						0.00393067
	1710	3403																						0.00394691
	1730	3519																						0.00408145
	1750	3550																						0.0041174
	1770	3417																						0.00396315
	1790	3390																						0.00393183
	1810	3352																						0.00388776
	1830	3304																						0.00383208
	1850	3329																						0.00386108
	1870	3262																						0.00378337
	1890	3227																						0.00374278
	1910	3293																						0.00381933
	1930	3179																						0.00368711
	1950	3311																						0.0038402
	1970	3576																						0.00414756
	1990	3177																						0.00368479
	2010	3196																						0.00370682
	2030	3101																						0.00359664
	2050	3038																						0.00352357
	2070	2951																						0.00342266
	2090	2932																						0.00340063
	2110	3043																						0.00352937
	2130	3030																						0.00351429
	2150	3022																						0.00350501
	2170	2945																						0.0034157
	2190	3008																						0.00348877
	2210	2931																						0.00339947
	2230	2856																						0.00331248
	2250	2931																						0.00339947
	2270	3087																						0.0035804
	2290	3029																						0.00351313
	2310	3005																						0.00348529
	2330	2915																						0.00338091
	2350	3054																						0.00354213
	2370	3149																						0.00365231
	2390	3254																						0.00377409
	2410	3261																						0.00378221
	2430	3137																						0.00363839
	2450	3141																						0.00364303
	2470	3048																						0.00353517
	2490	3028																						0.00351197

## Sheet: R Actinin
	Actinin
	#	Data	to	plot	the	line	corresponding	to	r	histogram	:	x	=	middle	of	bin,	y	=	nb	of	molecules		sum	proportion	max
	-2490	574																					247063	0.00232329	0.00763773
	-2470	611																						0.00247305
	-2450	584																						0.00236377
	-2430	642																						0.00259853
	-2410	629																						0.00254591
	-2390	698																						0.00282519
	-2370	629																						0.00254591
	-2350	601																						0.00243258
	-2330	526																						0.00212901
	-2310	527																						0.00213306
	-2290	588																						0.00237996
	-2270	529																						0.00214115
	-2250	492																						0.00199139
	-2230	503																						0.00203592
	-2210	657																						0.00265924
	-2190	631																						0.002554
	-2170	574																						0.00232329
	-2150	570																						0.0023071
	-2130	614																						0.0024852
	-2110	660																						0.00267138
	-2090	683																						0.00276448
	-2070	575																						0.00232734
	-2050	588																						0.00237996
	-2030	607																						0.00245686
	-2010	617																						0.00249734
	-1990	638																						0.00258234
	-1970	675																						0.0027321
	-1950	574																						0.00232329
	-1930	608																						0.00246091
	-1910	656																						0.00265519
	-1890	723																						0.00292638
	-1870	757																						0.003064
	-1850	728																						0.00294662
	-1830	659																						0.00266734
	-1810	660																						0.00267138
	-1790	728																						0.00294662
	-1770	732																						0.00296281
	-1750	737																						0.00298304
	-1730	767																						0.00310447
	-1710	700																						0.00283329
	-1690	741																						0.00299924
	-1670	715																						0.002894
	-1650	793																						0.00320971
	-1630	701																						0.00283733
	-1610	779																						0.00315304
	-1590	717																						0.00290209
	-1570	755																						0.0030559
	-1550	751																						0.00303971
	-1530	748																						0.00302757
	-1510	801																						0.00324209
	-1490	773																						0.00312876
	-1470	703																						0.00284543
	-1450	714																						0.00288995
	-1430	683																						0.00276448
	-1410	760																						0.00307614
	-1390	799																						0.00323399
	-1370	826																						0.00334328
	-1350	846																						0.00342423
	-1330	855																						0.00346066
	-1310	848																						0.00343232
	-1290	824																						0.00333518
	-1270	837																						0.0033878
	-1250	879																						0.0035578
	-1230	804																						0.00325423
	-1210	844																						0.00341613
	-1190	826																						0.00334328
	-1170	789																						0.00319352
	-1150	894																						0.00361851
	-1130	884																						0.00357803
	-1110	907																						0.00367113
	-1090	869																						0.00351732
	-1070	850																						0.00344042
	-1050	858																						0.0034728
	-1030	871																						0.00352542
	-1010	919																						0.0037197
	-990	869																						0.00351732
	-970	921																						0.00372779
	-950	909																						0.00367922
	-930	1023																						0.00414064
	-910	900																						0.0036428
	-890	888																						0.00359422
	-870	865																						0.00350113
	-850	868																						0.00351327
	-830	929																						0.00376017
	-810	991																						0.00401112
	-790	950																						0.00384517
	-770	959																						0.0038816
	-750	1033																						0.00418112
	-730	1041																						0.0042135
	-710	1138																						0.00460611
	-690	1027																						0.00415683
	-670	969																						0.00392208
	-650	1045																						0.00422969
	-630	1042																						0.00421755
	-610	1075																						0.00435112
	-590	1220																						0.00493801
	-570	1171																						0.00473968
	-550	1145																						0.00463445
	-530	1098																						0.00444421
	-510	1104																						0.0044685
	-490	1175																						0.00475587
	-470	1256																						0.00508372
	-450	1350																						0.00546419
	-430	1260																						0.00509991
	-410	1364																						0.00552086
	-390	1494																						0.00604704
	-370	1363																						0.00551681
	-350	1408																						0.00569895
	-330	1389																						0.00562205
	-310	1538																						0.00622513
	-290	1564																						0.00633037
	-270	1552																						0.0062818
	-250	1591																						0.00643965
	-230	1673																						0.00677155
	-210	1785																						0.00722488
	-190	1887																						0.00763773
	-170	1757																						0.00711155
	-150	1609																						0.00651251
	-130	1658																						0.00671084
	-110	1795																						0.00726535
	-90	1735																						0.0070225
	-70	1638																						0.00662989
	-50	1618																						0.00654894
	-30	1743																						0.00705488
	-10	1808																						0.00731797
	10	1791																						0.00724916
	30	1859																						0.0075244
	50	1795																						0.00726535
	70	1833																						0.00741916
	90	1703																						0.00689298
	110	1663																						0.00673108
	130	1737																						0.0070306
	150	1649																						0.00667441
	170	1646																						0.00666227
	190	1674																						0.0067756
	210	1623																						0.00656917
	230	1594																						0.0064518
	250	1502																						0.00607942
	270	1537																						0.00622109
	290	1488																						0.00602276
	310	1442																						0.00583657
	330	1480																						0.00599037
	350	1429																						0.00578395
	370	1383																						0.00559776
	390	1336																						0.00540753
	410	1259																						0.00509587
	430	1299																						0.00525777
	450	1290																						0.00522134
	470	1299																						0.00525777
	490	1264																						0.0051161
	510	1319																						0.00533872
	530	1269																						0.00513634
	550	1253																						0.00507158
	570	1177																						0.00476397
	590	1105																						0.00447254
	610	1105																						0.00447254
	630	1172																						0.00474373
	650	1180																						0.00477611
	670	1092																						0.00441993
	690	1007																						0.00407588
	710	1106																						0.00447659
	730	1100																						0.00445231
	750	1023																						0.00414064
	770	1010																						0.00408803
	790	1056																						0.00427421
	810	1023																						0.00414064
	830	996																						0.00403136
	850	985																						0.00398684
	870	936																						0.00378851
	890	1017																						0.00411636
	910	984																						0.00398279
	930	1028																						0.00416088
	950	1036																						0.00419326
	970	987																						0.00399493
	990	1021																						0.00413255
	1010	1002																						0.00405565
	1030	1034																						0.00418517
	1050	974																						0.00394231
	1070	940																						0.0038047
	1090	943																						0.00381684
	1110	844																						0.00341613
	1130	938																						0.0037966
	1150	929																						0.00376017
	1170	982																						0.00397469
	1190	969																						0.00392208
	1210	1034																						0.00418517
	1230	952																						0.00385327
	1250	909																						0.00367922
	1270	981																						0.00397065
	1290	1005																						0.00406779
	1310	991																						0.00401112
	1330	958																						0.00387755
	1350	895																						0.00362256
	1370	893																						0.00361446
	1390	958																						0.00387755
	1410	887																						0.00359018
	1430	940																						0.0038047
	1450	998																						0.00403946
	1470	941																						0.00380875
	1490	890																						0.00360232
	1510	938																						0.0037966
	1530	1019																						0.00412445
	1550	923																						0.00373589
	1570	987																						0.00399493
	1590	912																						0.00369137
	1610	827																						0.00334732
	1630	848																						0.00343232
	1650	712																						0.00288186
	1670	763																						0.00308828
	1690	904																						0.00365899
	1710	902																						0.00365089
	1730	863																						0.00349304
	1750	806																						0.00326233
	1770	745																						0.00301543
	1790	809																						0.00327447
	1810	905																						0.00366303
	1830	875																						0.00354161
	1850	840																						0.00339994
	1870	858																						0.0034728
	1890	864																						0.00349708
	1910	832																						0.00336756
	1930	854																						0.00345661
	1950	871																						0.00352542
	1970	812																						0.00328661
	1990	822																						0.00332709
	2010	818																						0.0033109
	2030	881																						0.00356589
	2050	700																						0.00283329
	2070	768																						0.00310852
	2090	826																						0.00334328
	2110	844																						0.00341613
	2130	815																						0.00329875
	2150	721																						0.00291828
	2170	739																						0.00299114
	2190	689																						0.00278876
	2210	700																						0.00283329
	2230	690																						0.00279281
	2250	663																						0.00268353
	2270	733																						0.00296685
	2290	714																						0.00288995
	2310	691																						0.00279686
	2330	702																						0.00284138
	2350	719																						0.00291019
	2370	763																						0.00308828
	2390	848																						0.00343232
	2410	845																						0.00342018
	2430	739																						0.00299114
	2450	676																						0.00273614
	2470	678																						0.00274424
	2490	657																						0.00265924

## Sheet: R FlnA
	#	Data	to	plot	the	line	corresponding	to	r	histogram	:	x	=	middle	of	bin,	y	=	nb	of	molecules		sum	proportion	max
	-2490	1147																					362536	0.00316382	0.00502571
	-2470	1255																						0.00346173
	-2450	1286																						0.00354723
	-2430	1353																						0.00373204
	-2410	1380																						0.00380652
	-2390	1212																						0.00334312
	-2370	1249																						0.00344518
	-2350	1242																						0.00342587
	-2330	1355																						0.00373756
	-2310	1326																						0.00365757
	-2290	1333																						0.00367688
	-2270	1363																						0.00375963
	-2250	1460																						0.00402719
	-2230	1379																						0.00380376
	-2210	1329																						0.00366584
	-2190	1279																						0.00352793
	-2170	1262																						0.00348103
	-2150	1212																						0.00334312
	-2130	1190																						0.00328243
	-2110	1280																						0.00353068
	-2090	1355																						0.00373756
	-2070	1344																						0.00370722
	-2050	1413																						0.00389754
	-2030	1375																						0.00379273
	-2010	1343																						0.00370446
	-1990	1311																						0.00361619
	-1970	1250																						0.00344793
	-1950	1243																						0.00342863
	-1930	1240																						0.00342035
	-1910	1203																						0.00331829
	-1890	1224																						0.00337622
	-1870	1197																						0.00330174
	-1850	1226																						0.00338173
	-1830	1226																						0.00338173
	-1810	1269																						0.00350034
	-1790	1239																						0.00341759
	-1770	1261																						0.00347828
	-1750	1294																						0.0035693
	-1730	1335																						0.00368239
	-1710	1326																						0.00365757
	-1690	1340																						0.00369618
	-1670	1300																						0.00358585
	-1650	1317																						0.00363274
	-1630	1277																						0.00352241
	-1610	1320																						0.00364102
	-1590	1298																						0.00358033
	-1570	1382																						0.00381204
	-1550	1362																						0.00375687
	-1530	1304																						0.00359688
	-1510	1432																						0.00394995
	-1490	1396																						0.00385065
	-1470	1374																						0.00378997
	-1450	1453																						0.00400788
	-1430	1490																						0.00410994
	-1410	1456																						0.00401615
	-1390	1528																						0.00421475
	-1370	1388																						0.00382859
	-1350	1447																						0.00399133
	-1330	1507																						0.00415683
	-1310	1431																						0.00394719
	-1290	1380																						0.00380652
	-1270	1457																						0.00401891
	-1250	1494																						0.00412097
	-1230	1526																						0.00420924
	-1210	1483																						0.00409063
	-1190	1423																						0.00392513
	-1170	1449																						0.00399684
	-1150	1508																						0.00415959
	-1130	1544																						0.00425889
	-1110	1486																						0.0040989
	-1090	1484																						0.00409339
	-1070	1498																						0.004132
	-1050	1566																						0.00431957
	-1030	1586																						0.00437474
	-1010	1797																						0.00495675
	-990	1639																						0.00452093
	-970	1624																						0.00447956
	-950	1629																						0.00449335
	-930	1645																						0.00453748
	-910	1684																						0.00464506
	-890	1558																						0.0042975
	-870	1624																						0.00447956
	-850	1639																						0.00452093
	-830	1679																						0.00463126
	-810	1745																						0.00481332
	-790	1642																						0.00452921
	-770	1614																						0.00445197
	-750	1622																						0.00447404
	-730	1732																						0.00477746
	-710	1645																						0.00453748
	-690	1693																						0.00466988
	-670	1645																						0.00453748
	-650	1540																						0.00424785
	-630	1732																						0.00477746
	-610	1682																						0.00463954
	-590	1707																						0.0047085
	-570	1601																						0.00441611
	-550	1744																						0.00481056
	-530	1680																						0.00463402
	-510	1693																						0.00466988
	-490	1602																						0.00441887
	-470	1673																						0.00461471
	-450	1583																						0.00436646
	-430	1487																						0.00410166
	-410	1551																						0.0042782
	-390	1504																						0.00414855
	-370	1566																						0.00431957
	-350	1563																						0.0043113
	-330	1497																						0.00412925
	-310	1433																						0.00395271
	-290	1531																						0.00422303
	-270	1486																						0.0040989
	-250	1428																						0.00393892
	-230	1347																						0.00371549
	-210	1406																						0.00387824
	-190	1347																						0.00371549
	-170	1420																						0.00391685
	-150	1289																						0.00355551
	-130	1237																						0.00341207
	-110	1213																						0.00334587
	-90	1192																						0.00328795
	-70	1153																						0.00318037
	-50	1098																						0.00302866
	-30	1049																						0.00289351
	-10	987																						0.00272249
	10	944																						0.00260388
	30	989																						0.002728
	50	1064																						0.00293488
	70	1073																						0.00295971
	90	1105																						0.00304797
	110	1081																						0.00298177
	130	1271																						0.00350586
	150	1250																						0.00344793
	170	1266																						0.00349207
	190	1298																						0.00358033
	210	1381																						0.00380928
	230	1411																						0.00389203
	250	1606																						0.0044299
	270	1518																						0.00418717
	290	1529																						0.00421751
	310	1536																						0.00423682
	330	1571																						0.00433336
	350	1558																						0.0042975
	370	1643																						0.00453196
	390	1613																						0.00444921
	410	1579																						0.00435543
	430	1737																						0.00479125
	450	1692																						0.00466712
	470	1693																						0.00466988
	490	1727																						0.00476366
	510	1649																						0.00454851
	530	1633																						0.00450438
	550	1635																						0.0045099
	570	1725																						0.00475815
	590	1726																						0.00476091
	610	1808																						0.00498709
	630	1792																						0.00494296
	650	1679																						0.00463126
	670	1762																						0.00486021
	690	1761																						0.00485745
	710	1817																						0.00501192
	730	1822																						0.00502571
	750	1781																						0.00491262
	770	1593																						0.00439405
	790	1677																						0.00462575
	810	1664																						0.00458989
	830	1633																						0.00450438
	850	1635																						0.0045099
	870	1594																						0.0043968
	890	1627																						0.00448783
	910	1644																						0.00453472
	930	1608																						0.00443542
	950	1659																						0.0045761
	970	1598																						0.00440784
	990	1634																						0.00450714
	1010	1753																						0.00483538
	1030	1753																						0.00483538
	1050	1754																						0.00483814
	1070	1674																						0.00461747
	1090	1645																						0.00453748
	1110	1627																						0.00448783
	1130	1725																						0.00475815
	1150	1603																						0.00442163
	1170	1532																						0.00422579
	1190	1477																						0.00407408
	1210	1555																						0.00428923
	1230	1525																						0.00420648
	1250	1473																						0.00406304
	1270	1658																						0.00457334
	1290	1545																						0.00426165
	1310	1483																						0.00409063
	1330	1665																						0.00459265
	1350	1423																						0.00392513
	1370	1602																						0.00441887
	1390	1576																						0.00434715
	1410	1546																						0.0042644
	1430	1585																						0.00437198
	1450	1474																						0.0040658
	1470	1588																						0.00438025
	1490	1516																						0.00418165
	1510	1510																						0.0041651
	1530	1479																						0.00407959
	1550	1596																						0.00440232
	1570	1471																						0.00405753
	1590	1534																						0.0042313
	1610	1577																						0.00434991
	1630	1475																						0.00406856
	1650	1365																						0.00376514
	1670	1323																						0.00364929
	1690	1391																						0.00383686
	1710	1417																						0.00390858
	1730	1487																						0.00410166
	1750	1505																						0.00415131
	1770	1497																						0.00412925
	1790	1495																						0.00412373
	1810	1398																						0.00385617
	1830	1367																						0.00377066
	1850	1370																						0.00377894
	1870	1413																						0.00389754
	1890	1454																						0.00401064
	1910	1376																						0.00379549
	1930	1320																						0.00364102
	1950	1446																						0.00398857
	1970	1583																						0.00436646
	1990	1321																						0.00364378
	2010	1397																						0.00385341
	2030	1464																						0.00403822
	2050	1279																						0.00352793
	2070	1215																						0.00335139
	2090	1171																						0.00323002
	2110	1224																						0.00337622
	2130	1223																						0.00337346
	2150	1213																						0.00334587
	2170	1285																						0.00354448
	2190	1268																						0.00349758
	2210	1199																						0.00330726
	2230	1338																						0.00369067
	2250	1342																						0.0037017
	2270	1378																						0.003801
	2290	1265																						0.00348931
	2310	1153																						0.00318037
	2330	1160																						0.00319968
	2350	1148																						0.00316658
	2370	1164																						0.00321072
	2390	1211																						0.00334036
	2410	1227																						0.00338449
	2430	1176																						0.00324382
	2450	1224																						0.00337622
	2470	1254																						0.00345897
	2490	1211																						0.00334036

## Sheet: RPax
	#	Data	to	plot	the	line	corresponding	to	r	histogram	:	x	=	middle	of	bin,	y	=	nb	of	molecules		sum	proportion	max
	-2490	282																					132191	0.00213328	0.006536
	-2470	334																						0.00252665
	-2450	449																						0.0033966
	-2430	409																						0.00309401
	-2410	486																						0.0036765
	-2390	442																						0.00334365
	-2370	328																						0.00248126
	-2350	423																						0.00319992
	-2330	413																						0.00312427
	-2310	418																						0.00316209
	-2290	408																						0.00308644
	-2270	344																						0.0026023
	-2250	405																						0.00306375
	-2230	418																						0.00316209
	-2210	402																						0.00304105
	-2190	372																						0.00281411
	-2170	485																						0.00366893
	-2150	507																						0.00383536
	-2130	419																						0.00316966
	-2110	420																						0.00317722
	-2090	324																						0.002451
	-2070	380																						0.00287463
	-2050	444																						0.00335878
	-2030	421																						0.00318479
	-2010	385																						0.00291245
	-1990	339																						0.00256447
	-1970	443																						0.00335121
	-1950	385																						0.00291245
	-1930	357																						0.00270064
	-1910	409																						0.00309401
	-1890	375																						0.0028368
	-1870	392																						0.00296541
	-1850	372																						0.00281411
	-1830	410																						0.00310157
	-1810	485																						0.00366893
	-1790	438																						0.00331339
	-1770	455																						0.00344199
	-1750	435																						0.00329069
	-1730	442																						0.00334365
	-1710	478																						0.00361598
	-1690	576																						0.00435733
	-1670	469																						0.0035479
	-1650	376																						0.00284437
	-1630	365																						0.00276116
	-1610	339																						0.00256447
	-1590	414																						0.00313183
	-1570	488																						0.00369163
	-1550	525																						0.00397153
	-1530	427																						0.00323017
	-1510	410																						0.00310157
	-1490	448																						0.00338904
	-1470	591																						0.0044708
	-1450	505																						0.00382023
	-1430	500																						0.00378241
	-1410	507																						0.00383536
	-1390	515																						0.00389588
	-1370	411																						0.00310914
	-1350	492																						0.00372189
	-1330	477																						0.00360842
	-1310	492																						0.00372189
	-1290	504																						0.00381267
	-1270	531																						0.00401691
	-1250	497																						0.00375971
	-1230	512																						0.00387318
	-1210	500																						0.00378241
	-1190	500																						0.00378241
	-1170	507																						0.00383536
	-1150	484																						0.00366137
	-1130	474																						0.00358572
	-1110	471																						0.00356303
	-1090	504																						0.00381267
	-1070	497																						0.00375971
	-1050	549																						0.00415308
	-1030	508																						0.00384292
	-1010	521																						0.00394127
	-990	489																						0.00369919
	-970	469																						0.0035479
	-950	516																						0.00390344
	-930	504																						0.00381267
	-910	482																						0.00364624
	-890	445																						0.00336634
	-870	497																						0.00375971
	-850	634																						0.00479609
	-830	653																						0.00493982
	-810	626																						0.00473557
	-790	592																						0.00447837
	-770	639																						0.00483391
	-750	549																						0.00415308
	-730	556																						0.00420604
	-710	506																						0.00382779
	-690	554																						0.00419091
	-670	512																						0.00387318
	-650	557																						0.0042136
	-630	590																						0.00446324
	-610	689																						0.00521216
	-590	636																						0.00481122
	-570	596																						0.00450863
	-550	630																						0.00476583
	-530	625																						0.00472801
	-510	722																						0.00546179
	-490	783																						0.00592325
	-470	536																						0.00405474
	-450	564																						0.00426655
	-430	612																						0.00462966
	-410	673																						0.00509112
	-390	701																						0.00530293
	-370	698																						0.00528024
	-350	599																						0.00453132
	-330	633																						0.00478853
	-310	599																						0.00453132
	-290	655																						0.00495495
	-270	678																						0.00512894
	-250	553																						0.00418334
	-230	500																						0.00378241
	-210	521																						0.00394127
	-190	538																						0.00406987
	-170	447																						0.00338147
	-150	358																						0.0027082
	-130	255																						0.00192903
	-110	231																						0.00174747
	-90	169																						0.00127845
	-70	141																						0.00106664
	-50	96																						0.000726222
	-30	79																						0.00059762
	-10	95																						0.000718657
	10	94																						0.000711092
	30	149																						0.00112716
	50	191																						0.00144488
	70	229																						0.00173234
	90	312																						0.00236022
	110	409																						0.00309401
	130	444																						0.00335878
	150	566																						0.00428168
	170	567																						0.00428925
	190	574																						0.0043422
	210	606																						0.00458428
	230	792																						0.00599133
	250	736																						0.0055677
	270	695																						0.00525754
	290	710																						0.00537102
	310	647																						0.00489443
	330	673																						0.00509112
	350	721																						0.00545423
	370	732																						0.00553744
	390	687																						0.00519703
	410	569																						0.00430438
	430	716																						0.00541641
	450	715																						0.00540884
	470	749																						0.00566604
	490	777																						0.00587786
	510	681																						0.00515164
	530	710																						0.00537102
	550	772																						0.00584003
	570	720																						0.00544666
	590	757																						0.00572656
	610	673																						0.00509112
	630	673																						0.00509112
	650	685																						0.0051819
	670	726																						0.00549205
	690	756																						0.005719
	710	674																						0.00509868
	730	793																						0.0059989
	750	864																						0.006536
	770	741																						0.00560553
	790	658																						0.00497765
	810	617																						0.00466749
	830	701																						0.00530293
	850	661																						0.00500034
	870	711																						0.00537858
	890	653																						0.00493982
	910	749																						0.00566604
	930	582																						0.00440272
	950	572																						0.00432707
	970	626																						0.00473557
	990	638																						0.00482635
	1010	630																						0.00476583
	1030	665																						0.0050306
	1050	751																						0.00568117
	1070	652																						0.00493226
	1090	646																						0.00488687
	1110	674																						0.00509868
	1130	630																						0.00476583
	1150	554																						0.00419091
	1170	544																						0.00411526
	1190	544																						0.00411526
	1210	600																						0.00453889
	1230	619																						0.00468262
	1250	654																						0.00494739
	1270	612																						0.00462966
	1290	583																						0.00441029
	1310	625																						0.00472801
	1330	612																						0.00462966
	1350	638																						0.00482635
	1370	653																						0.00493982
	1390	625																						0.00472801
	1410	560																						0.00423629
	1430	568																						0.00429681
	1450	610																						0.00461454
	1470	550																						0.00416065
	1490	554																						0.00419091
	1510	560																						0.00423629
	1530	569																						0.00430438
	1550	559																						0.00422873
	1570	626																						0.00473557
	1590	550																						0.00416065
	1610	569																						0.00430438
	1630	536																						0.00405474
	1650	554																						0.00419091
	1670	508																						0.00384292
	1690	522																						0.00394883
	1710	558																						0.00422116
	1730	507																						0.00383536
	1750	585																						0.00442541
	1770	569																						0.00430438
	1790	543																						0.00410769
	1810	590																						0.00446324
	1830	592																						0.00447837
	1850	582																						0.00440272
	1870	509																						0.00385049
	1890	491																						0.00371432
	1910	485																						0.00366893
	1930	552																						0.00417578
	1950	564																						0.00426655
	1970	476																						0.00360085
	1990	419																						0.00316966
	2010	467																						0.00353277
	2030	522																						0.00394883
	2050	539																						0.00407743
	2070	434																						0.00328313
	2090	482																						0.00364624
	2110	514																						0.00388831
	2130	533																						0.00403204
	2150	595																						0.00450106
	2170	596																						0.00450863
	2190	496																						0.00375215
	2210	510																						0.00385805
	2230	478																						0.00361598
	2250	576																						0.00435733
	2270	572																						0.00432707
	2290	527																						0.00398666
	2310	470																						0.00355546
	2330	506																						0.00382779
	2350	537																						0.0040623
	2370	478																						0.00361598
	2390	443																						0.00335121
	2410	460																						0.00347981
	2430	477																						0.00360842
	2450	490																						0.00370676
	2470	449																						0.0033966
	2490	458																						0.00346468

## Sheet: RTln
	#	Data	to	plot	the	line	corresponding	to	r	histogram	:	x	=	middle	of	bin,	y	=	nb	of	molecules		sum	proportion	max
	-2490	3306																					862485	0.00383311	0.00512589
	-2470	3144																						0.00364528
	-2450	3185																						0.00369282
	-2430	3482																						0.00403717
	-2410	3372																						0.00390963
	-2390	3345																						0.00387833
	-2370	3459																						0.0040105
	-2350	3459																						0.0040105
	-2330	3460																						0.00401166
	-2310	3473																						0.00402674
	-2290	3606																						0.00418094
	-2270	3392																						0.00393282
	-2250	3535																						0.00409862
	-2230	3403																						0.00394558
	-2210	3378																						0.00391659
	-2190	3479																						0.00403369
	-2170	3403																						0.00394558
	-2150	3367																						0.00390384
	-2130	3354																						0.00388876
	-2110	3306																						0.00383311
	-2090	3339																						0.00387137
	-2070	3132																						0.00363137
	-2050	3269																						0.00379021
	-2030	3523																						0.00408471
	-2010	3486																						0.00404181
	-1990	3404																						0.00394674
	-1970	3647																						0.00422848
	-1950	3653																						0.00423544
	-1930	3604																						0.00417862
	-1910	3574																						0.00414384
	-1890	3492																						0.00404877
	-1870	3635																						0.00421457
	-1850	3570																						0.0041392
	-1830	3630																						0.00420877
	-1810	3457																						0.00400819
	-1790	3445																						0.00399427
	-1770	3452																						0.00400239
	-1750	3496																						0.0040534
	-1730	3347																						0.00388065
	-1710	3168																						0.00367311
	-1690	3473																						0.00402674
	-1670	3544																						0.00410906
	-1650	3357																						0.00389224
	-1630	3517																						0.00407775
	-1610	3474																						0.0040279
	-1590	3494																						0.00405108
	-1570	3695																						0.00428413
	-1550	3485																						0.00404065
	-1530	3453																						0.00400355
	-1510	3426																						0.00397224
	-1490	3690																						0.00427834
	-1470	3677																						0.00426326
	-1450	3435																						0.00398268
	-1430	3424																						0.00396992
	-1410	3309																						0.00383659
	-1390	3392																						0.00393282
	-1370	3474																						0.0040279
	-1350	3632																						0.00421109
	-1330	3526																						0.00408819
	-1310	3437																						0.003985
	-1290	3363																						0.0038992
	-1270	3491																						0.00404761
	-1250	3637																						0.00421688
	-1230	3642																						0.00422268
	-1210	3586																						0.00415775
	-1190	3667																						0.00425167
	-1170	3722																						0.00431544
	-1150	3801																						0.00440703
	-1130	3719																						0.00431196
	-1110	3793																						0.00439776
	-1090	3954																						0.00458443
	-1070	3996																						0.00463312
	-1050	3949																						0.00457863
	-1030	3610																						0.00418558
	-1010	3758																						0.00435718
	-990	3766																						0.00436645
	-970	3750																						0.0043479
	-950	3633																						0.00421225
	-930	3514																						0.00407427
	-910	3633																						0.00421225
	-890	3570																						0.0041392
	-870	3645																						0.00422616
	-850	3322																						0.00385166
	-830	3546																						0.00411138
	-810	3605																						0.00417978
	-790	3550																						0.00411601
	-770	3433																						0.00398036
	-750	3301																						0.00382731
	-730	3324																						0.00385398
	-710	3484																						0.00403949
	-690	3498																						0.00405572
	-670	3436																						0.00398384
	-650	3330																						0.00386094
	-630	3488																						0.00404413
	-610	3369																						0.00390615
	-590	3251																						0.00376934
	-570	3370																						0.00390731
	-550	3323																						0.00385282
	-530	3240																						0.00375659
	-510	3272																						0.00379369
	-490	3159																						0.00366267
	-470	3123																						0.00362093
	-450	3134																						0.00363369
	-430	3100																						0.00359427
	-410	3112																						0.00360818
	-390	2979																						0.00345397
	-370	3014																						0.00349455
	-350	2964																						0.00343658
	-330	2959																						0.00343078
	-310	2897																						0.0033589
	-290	2822																						0.00327194
	-270	2694																						0.00312353
	-250	2728																						0.00316295
	-230	2458																						0.0028499
	-210	2060																						0.00238845
	-190	2022																						0.00234439
	-170	1889																						0.00219018
	-150	1677																						0.00194438
	-130	1340																						0.00155365
	-110	1119																						0.00129741
	-90	1007																						0.00116756
	-70	824																						0.000955379
	-50	735																						0.000852189
	-30	813																						0.000942625
	-10	821																						0.000951901
	10	917																						0.00106321
	30	1058																						0.00122669
	50	994																						0.00115248
	70	999																						0.00115828
	90	1151																						0.00133452
	110	1565																						0.00181452
	130	1758																						0.0020383
	150	1815																						0.00210438
	170	2064																						0.00239309
	190	2485																						0.00288121
	210	2708																						0.00313976
	230	2920																						0.00338557
	250	2904																						0.00336702
	270	2867																						0.00332412
	290	3229																						0.00374383
	310	3334																						0.00386557
	330	3227																						0.00374151
	350	3143																						0.00364412
	370	3303																						0.00382963
	390	3299																						0.00382499
	410	3486																						0.00404181
	430	3331																						0.0038621
	450	3536																						0.00409978
	470	3268																						0.00378905
	490	3269																						0.00379021
	510	3566																						0.00413456
	530	3627																						0.00420529
	550	3465																						0.00401746
	570	3696																						0.00428529
	590	3866																						0.0044824
	610	3962																						0.0045937
	630	3794																						0.00439892
	650	3771																						0.00437225
	670	3746																						0.00434326
	690	3666																						0.00425051
	710	3601																						0.00417515
	730	3778																						0.00438037
	750	3801																						0.00440703
	770	3947																						0.00457631
	790	3949																						0.00457863
	810	3668																						0.00425283
	830	3662																						0.00424587
	850	3779																						0.00438153
	870	3703																						0.00429341
	890	3926																						0.00455196
	910	3943																						0.00457167
	930	4042																						0.00468646
	950	3771																						0.00437225
	970	3713																						0.004305
	990	3742																						0.00433863
	1010	3913																						0.00453689
	1030	4109																						0.00476414
	1050	3867																						0.00448356
	1070	3770																						0.00437109
	1090	3935																						0.0045624
	1110	3992																						0.00462849
	1130	4204																						0.00487429
	1150	4110																						0.0047653
	1170	4111																						0.00476646
	1190	4102																						0.00475602
	1210	4029																						0.00467139
	1230	4105																						0.0047595
	1250	4069																						0.00471776
	1270	4061																						0.00470849
	1290	4061																						0.00470849
	1310	4179																						0.0048453
	1330	4221																						0.004894
	1350	4421																						0.00512589
	1370	4127																						0.00478501
	1390	4136																						0.00479545
	1410	4144																						0.00480472
	1430	3930																						0.0045566
	1450	4167																						0.00483139
	1470	4098																						0.00475139
	1490	4289																						0.00497284
	1510	4356																						0.00505052
	1530	4043																						0.00468762
	1550	3990																						0.00462617
	1570	3727																						0.00432123
	1590	3909																						0.00453225
	1610	4052																						0.00469805
	1630	4079																						0.00472936
	1650	3955																						0.00458559
	1670	4083																						0.004734
	1690	3991																						0.00462733
	1710	3749																						0.00434674
	1730	3935																						0.0045624
	1750	3988																						0.00462385
	1770	3977																						0.00461109
	1790	3872																						0.00448935
	1810	3592																						0.00416471
	1830	4008																						0.00464704
	1850	3950																						0.00457979
	1870	3600																						0.00417399
	1890	3760																						0.0043595
	1910	3798																						0.00440355
	1930	3873																						0.00449051
	1950	3997																						0.00463428
	1970	4023																						0.00466443
	1990	4140																						0.00480008
	2010	4022																						0.00466327
	2030	3951																						0.00458095
	2050	4000																						0.00463776
	2070	4047																						0.00469226
	2090	4153																						0.00481516
	2110	3956																						0.00458675
	2130	3850																						0.00446385
	2150	3799																						0.00440471
	2170	3784																						0.00438732
	2190	3888																						0.0045079
	2210	4057																						0.00470385
	2230	4248																						0.0049253
	2250	4124																						0.00478153
	2270	4146																						0.00480704
	2290	4239																						0.00491487
	2310	4151																						0.00481284
	2330	4014																						0.00465399
	2350	3887																						0.00450675
	2370	4199																						0.00486849
	2390	4300																						0.00498559
	2410	3890																						0.00451022
	2430	3738																						0.00433399
	2450	3847																						0.00446037
	2470	3887																						0.00450675
	2490	3961																						0.00459254

## Sheet: RVinc
Rvinc				197967
	#	Data	to	plot	the	line	corresponding	to	r	histogram	:	x	=	middle	of	bin,	y	=	nb	of	molecules		sum	proportion	max
	-2490	709																					197967	0.0035814	0.00582925
	-2470	695																						0.00351069
	-2450	765																						0.00386428
	-2430	818																						0.004132
	-2410	676																						0.00341471
	-2390	623																						0.00314699
	-2370	610																						0.00308132
	-2350	617																						0.00311668
	-2330	620																						0.00313184
	-2310	611																						0.00308637
	-2290	647																						0.00326822
	-2270	676																						0.00341471
	-2250	709																						0.0035814
	-2230	651																						0.00328843
	-2210	634																						0.00320255
	-2190	634																						0.00320255
	-2170	667																						0.00336925
	-2150	706																						0.00356625
	-2130	676																						0.00341471
	-2110	653																						0.00329853
	-2090	660																						0.00333389
	-2070	634																						0.00320255
	-2050	620																						0.00313184
	-2030	620																						0.00313184
	-2010	694																						0.00350563
	-1990	730																						0.00368748
	-1970	740																						0.003738
	-1950	738																						0.00372789
	-1930	644																						0.00325307
	-1910	638																						0.00322276
	-1890	607																						0.00306617
	-1870	665																						0.00335915
	-1850	644																						0.00325307
	-1830	701																						0.00354099
	-1810	637																						0.00321771
	-1790	631																						0.0031874
	-1770	626																						0.00316214
	-1750	649																						0.00327832
	-1730	695																						0.00351069
	-1710	708																						0.00357635
	-1690	671																						0.00338945
	-1670	716																						0.00361676
	-1650	666																						0.0033642
	-1630	636																						0.00321266
	-1610	660																						0.00333389
	-1590	673																						0.00339956
	-1570	732																						0.00369759
	-1550	740																						0.003738
	-1530	695																						0.00351069
	-1510	736																						0.00371779
	-1490	809																						0.00408654
	-1470	795																						0.00401582
	-1450	740																						0.003738
	-1430	675																						0.00340966
	-1410	727																						0.00367233
	-1390	773																						0.00390469
	-1370	690																						0.00348543
	-1350	738																						0.00372789
	-1330	701																						0.00354099
	-1310	686																						0.00346522
	-1290	648																						0.00327327
	-1270	688																						0.00347533
	-1250	702																						0.00354605
	-1230	780																						0.00394005
	-1210	820																						0.0041421
	-1190	812																						0.00410169
	-1170	827																						0.00417746
	-1150	879																						0.00444013
	-1130	738																						0.00372789
	-1110	750																						0.00378851
	-1090	706																						0.00356625
	-1070	778																						0.00392995
	-1050	813																						0.00410675
	-1030	809																						0.00408654
	-1010	906																						0.00457652
	-990	783																						0.0039552
	-970	864																						0.00436436
	-950	796																						0.00402087
	-930	757																						0.00382387
	-910	863																						0.00435931
	-890	923																						0.00466239
	-870	970																						0.00489981
	-850	951																						0.00480383
	-830	863																						0.00435931
	-810	870																						0.00439467
	-790	871																						0.00439972
	-770	910																						0.00459673
	-750	900																						0.00454621
	-730	847																						0.00427849
	-710	856																						0.00432395
	-690	849																						0.00428859
	-670	896																						0.00452601
	-650	830																						0.00419262
	-630	836																						0.00422293
	-610	894																						0.0045159
	-590	944																						0.00476847
	-570	853																						0.0043088
	-550	848																						0.00428354
	-530	859																						0.00433911
	-510	897																						0.00453106
	-490	864																						0.00436436
	-470	900																						0.00454621
	-450	921																						0.00465229
	-430	979																						0.00494527
	-410	1019																						0.00514732
	-390	996																						0.00503114
	-370	995																						0.00502609
	-350	1096																						0.00553628
	-330	1096																						0.00553628
	-310	1119																						0.00565246
	-290	1082																						0.00546556
	-270	981																						0.00495537
	-250	980																						0.00495032
	-230	938																						0.00473816
	-210	913																						0.00461188
	-190	918																						0.00463714
	-170	761																						0.00384408
	-150	624		5973																				0.00315204
	-130	599																						0.00302576
	-110	487																						0.00246001
	-90	402																						0.00203064
	-70	334																						0.00168715
	-50	335																						0.0016922
	-30	308																						0.00155581
	-10	280																						0.00141438
	10	264																						0.00133356
	30	229																						0.00115676
	50	233																						0.00117696
	70	257																						0.0012982
	90	313																						0.00158107
	110	400																						0.00202054
	130	423																						0.00213672
	150	485																						0.0024499
	170	587																						0.00296514
	190	605																						0.00305606
	210	711																						0.00359151
	230	700																						0.00353594
	250	753																						0.00380366
	270	797																						0.00402592
	290	849																						0.00428859
	310	750																						0.00378851
	330	797																						0.00402592
	350	772																						0.00389964
	370	822																						0.00415221
	390	910																						0.00459673
	410	835																						0.00421787
	430	860																						0.00434416
	450	985																						0.00497558
	470	999																						0.0050463
	490	940																						0.00474827
	510	974																						0.00492001
	530	947																						0.00478363
	550	1055																						0.00532917
	570	1030																						0.00520289
	590	991																						0.00500588
	610	1021																						0.00515743
	630	948																						0.00478868
	650	947																						0.00478363
	670	985																						0.00497558
	690	976																						0.00493011
	710	967																						0.00488465
	730	956																						0.00482909
	750	1061																						0.00535948
	770	977																						0.00493517
	790	995																						0.00502609
	810	1084																						0.00547566
	830	1040																						0.0052534
	850	957																						0.00483414
	870	1030																						0.00520289
	890	1003																						0.0050665
	910	1027																						0.00518773
	930	1085																						0.00548071
	950	959																						0.00484424
	970	943																						0.00476342
	990	1017																						0.00513722
	1010	1154																						0.00582925
	1030	1041																						0.00525845
	1050	959																						0.00484424
	1070	932																						0.00470786
	1090	899																						0.00454116
	1110	960																						0.00484929
	1130	935																						0.00472301
	1150	937																						0.00473311
	1170	940																						0.00474827
	1190	1001																						0.0050564
	1210	1030																						0.00520289
	1230	963																						0.00486445
	1250	1006																						0.00508166
	1270	972																						0.00490991
	1290	992																						0.00501094
	1310	1025																						0.00517763
	1330	956																						0.00482909
	1350	968																						0.0048897
	1370	981																						0.00495537
	1390	954																						0.00481898
	1410	886																						0.00447549
	1430	921																						0.00465229
	1450	868																						0.00438457
	1470	1007																						0.00508671
	1490	1001																						0.0050564
	1510	968																						0.0048897
	1530	994																						0.00502104
	1550	846																						0.00427344
	1570	881																						0.00445024
	1590	861																						0.00434921
	1610	931																						0.0047028
	1630	884																						0.00446539
	1650	897																						0.00453106
	1670	867																						0.00437952
	1690	880																						0.00444519
	1710	823																						0.00415726
	1730	819																						0.00413705
	1750	823																						0.00415726
	1770	830																						0.00419262
	1790	771																						0.00389459
	1810	784																						0.00396026
	1830	686																						0.00346522
	1850	746																						0.0037683
	1870	843																						0.00425829
	1890	858																						0.00433406
	1910	836																						0.00422293
	1930	786																						0.00397036
	1950	770																						0.00388954
	1970	712																						0.00359656
	1990	669																						0.00337935
	2010	720																						0.00363697
	2030	779																						0.003935
	2050	742																						0.0037481
	2070	696																						0.00351574
	2090	787																						0.00397541
	2110	747																						0.00377336
	2130	782																						0.00395015
	2150	706																						0.00356625
	2170	673																						0.00339956
	2190	636																						0.00321266
	2210	718																						0.00362687
	2230	753																						0.00380366
	2250	772																						0.00389964
	2270	805																						0.00406633
	2290	660																						0.00333389
	2310	617																						0.00311668
	2330	717																						0.00362182
	2350	647																						0.00326822
	2370	589																						0.00297524
	2390	628																						0.00317225
	2410	644																						0.00325307
	2430	693																						0.00350058
	2450	694																						0.00350563
	2470	597																						0.00301565
	2490	611																						0.00308637

## Sheet: Zhist F-act
	#	Data	to	plot	the	line	corresponding	to	z	histogram	:	x	=	middle	of	bin,	y	=	nb	of	molecules
	-37.5	9276																								#	Data	to	plot	the	line	corresponding	to	z	histogram	:	x	=	middle	of	bin,	y	=	nb	of	molecules
	-32.5	10156																								-37.50000	9276.00000
	-27.5	13403																								-32.50000	10156.00000
	-22.5	12220																								-27.50000	13403.00000
	-17.5	12997																								-22.50000	12220.00000
	-12.5	13951																								-17.50000	12997.00000
	-7.5	14653																								-12.50000	13951.00000
	-2.5	15453																				Sum	Frequence			-7.50000	14653.00000
	2.5	19439																				597358	0.0325416			-2.50000	15453.00000
	7.5	16481																					0.0275898			2.50000	19439.00000
	12.5	16665																					0.0278978			7.50000	16481.00000
	17.5	16828																					0.0281707			12.50000	16665.00000
	22.5	20660																					0.0345856			17.50000	16828.00000
	27.5	17117																					0.0286545			22.50000	20660.00000
	32.5	16630																					0.0278393			27.50000	17117.00000
	37.5	16498																					0.0276183			32.50000	16630.00000
	42.5	16156																					0.0270458			37.50000	16498.00000
	47.5	19197																					0.0321365			42.50000	16156.00000
	52.5	15590																					0.0260983			47.50000	19197.00000
	57.5	14996																					0.0251039			52.50000	15590.00000
	62.5	17749																					0.0297125			57.50000	14996.00000
	67.5	14164																					0.0237111			62.50000	17749.00000
	72.5	13569																					0.022715			67.50000	14164.00000
	77.5	13075																					0.021888			72.50000	13569.00000
	82.5	14838																					0.0248394			77.50000	13075.00000
	87.5	12121																					0.020291			82.50000	14838.00000
	92.5	11705																					0.0195946			87.50000	12121.00000
	97.5	13412																					0.0224522			92.50000	11705.00000
	102.5	10789																					0.0180612			97.50000	13412.00000
	107.5	10349																					0.0173246			102.50000	10789.00000
	112.5	11881																					0.0198892			107.50000	10349.00000
	117.5	9349																					0.0156506			112.50000	11881.00000
	122.5	9022																					0.0151032			117.50000	9349.00000
	127.5	10363																					0.0173481			122.50000	9022.00000
	132.5	8497																					0.0142243			127.50000	10363.00000
	137.5	7888																					0.0132048			132.50000	8497.00000
	142.5	9127																					0.0152789			137.50000	7888.00000
	147.5	7277																					0.012182			142.50000	9127.00000
	152.5	7050																					0.011802			147.50000	7277.00000
	157.5	8099																					0.013558			152.50000	7050.00000
	162.5	6516																					0.010908			157.50000	8099.00000
	167.5	7428																					0.0124348			162.50000	6516.00000
	172.5	6066																					0.0101547			167.50000	7428.00000
	177.5	5695																					0.00953365			172.50000	6066.00000
	182.5	6399																					0.0107122			177.50000	5695.00000
	187.5	5200																					0.008705			182.50000	6399.00000
	192.5	5930																					0.00992705			187.50000	5200.00000
	197.5	4734																					0.0079249			192.50000	5930.00000
	202.5	4541																					0.00760181			197.50000	4734.00000
	207.5	5366																					0.00898289			202.50000	4541.00000
	212.5	4248																					0.00711131			207.50000	5366.00000
	217.5	4793																					0.00802366			212.50000	4248.00000
	222.5	3867																					0.00647351			217.50000	4793.00000
	227.5	4531																					0.00758507			222.50000	3867.00000
	232.5	3529																					0.00590768			227.50000	4531.00000
	237.5	4086																					0.00684012			232.50000	3529.00000
	242.5	3265																					0.00546573			237.50000	4086.00000
	247.5	3860																					0.00646179			242.50000	3265.00000
	252.5	3016																					0.0050489			247.50000	3860.00000
	257.5	3485																					0.00583402			252.50000	3016.00000
	262.5	2857																					0.00478273			257.50000	3485.00000
	267.5	2700																					0.0045199			262.50000	2857.00000
	272.5	3065																					0.00513093			267.50000	2700.00000
	277.5	2501																					0.00418677			272.50000	3065.00000
	282.5	2888																					0.00483462			277.50000	2501.00000
	287.5	2334																					0.0039072			282.50000	2888.00000
	292.5	2736																					0.00458017			287.50000	2334.00000
	297.5	2202																					0.00368623			292.50000	2736.00000
	302.5	2593																					0.00434078			297.50000	2202.00000
	307.5	1979																					0.00331292			302.50000	2593.00000
	312.5	2360																					0.00395073			307.50000	1979.00000
	317.5	2259																					0.00378165			312.50000	2360.00000
	322.5	1862																					0.00311706			317.50000	2259.00000
	327.5	2107																					0.0035272			322.50000	1862.00000
	332.5	1764																					0.002953			327.50000	2107.00000
	337.5	1960																					0.00328111			332.50000	1764.00000
	342.5	1574																					0.00263494			337.50000	1960.00000
	347.5	1824																					0.00305345			342.50000	1574.00000
	352.5	1544																					0.00258471			347.50000	1824.00000
	357.5	1714																					0.0028693			352.50000	1544.00000
	362.5	1381																					0.00231185			357.50000	1714.00000
	367.5	1654																					0.00276886			362.50000	1381.00000
	372.5	1323																					0.00221475			367.50000	1654.00000
	377.5	1502																					0.00251441			372.50000	1323.00000
	382.5	1232																					0.00206241			377.50000	1502.00000
	387.5	1455																					0.00243573			382.50000	1232.00000
	392.5	1135																					0.00190003			387.50000	1455.00000
	397.5	1450																					0.00242736			392.50000	1135.00000
	402.5	1131																					0.00189334			397.50000	1450.00000
	407.5	1009																					0.0016891			402.50000	1131.00000
	412.5	1287																					0.00215449			407.50000	1009.00000
	417.5	971																					0.00162549			412.50000	1287.00000
	422.5	1115																					0.00186655			417.50000	971.00000
	427.5	924																					0.00154681			422.50000	1115.00000
	432.5	1110																					0.00185818			427.50000	924.00000
	437.5	966																					0.00161712			432.50000	1110.00000
	442.5	1005																					0.00168241			437.50000	966.00000
	447.5	831																					0.00139113			442.50000	1005.00000
	452.5	1026																					0.00171756			447.50000	831.00000
	457.5	769																					0.00128734			452.50000	1026.00000
	462.5	752																					0.00125888			457.50000	769.00000
	467.5	946																					0.00158364			462.50000	752.00000
	472.5	739																					0.00123711			467.50000	946.00000
	477.5	861																					0.00144135			472.50000	739.00000
	482.5	697																					0.0011668			477.50000	861.00000
	487.5	651																					0.0010898			482.50000	697.00000
	492.5	721																					0.00120698			487.50000	651.00000
	497.5	756																					0.00126557			492.50000	721.00000
																										497.50000	756.00000

## Sheet: ZhistCort
	#	Data	to	plot	the	line	corresponding	to	z	histogram	:	x	=	middle	of	bin,	y	=	nb	of	molecules
	-37.5	5935
	-32.5	6437
	-27.5	8259
	-22.5	7443
	-17.5	8265
	-12.5	8993
	-7.5	9855
	-2.5	10038																				Sum	Frequence
	2.5	10624																				796969	0.0133305
	7.5	10969																					0.0137634
	12.5	11735																					0.0147245
	17.5	11510																					0.0144422
	22.5	12892																					0.0161763
	27.5	11621																					0.0145815
	32.5	12158																					0.0152553
	37.5	11727																					0.0147145
	42.5	11504																					0.0144347
	47.5	12512																					0.0156995
	52.5	11778																					0.0147785
	57.5	12842																					0.0161136
	62.5	12318																					0.0154561
	67.5	11620																					0.0145802
	72.5	11459																					0.0143782
	77.5	12487																					0.0156681
	82.5	11520																					0.0144548
	87.5	11515																					0.0144485
	92.5	13933																					0.0174825
	97.5	11827																					0.01484
	102.5	11619																					0.014579
	107.5	12916																					0.0162064
	112.5	11737																					0.014727
	117.5	13133																					0.0164787
	122.5	12366																					0.0155163
	127.5	11779																					0.0147797
	132.5	13394																					0.0168062
	137.5	11461																					0.0143807
	142.5	13099																					0.016436
	147.5	12151																					0.0152465
	152.5	12716																					0.0159555
	157.5	11351																					0.0142427
	162.5	12894																					0.0161788
	167.5	11343																					0.0142327
	172.5	12352																					0.0154987
	177.5	11013																					0.0138186
	182.5	10743																					0.0134798
	187.5	11930																					0.0149692
	192.5	12349																					0.015495
	197.5	10031																					0.0125864
	202.5	11499																					0.0144284
	207.5	10111																					0.0126868
	212.5	11247																					0.0141122
	217.5	9435																					0.0118386
	222.5	10510																					0.0131875
	227.5	9059																					0.0113668
	232.5	10231																					0.0128374
	237.5	8938																					0.011215
	242.5	9408																					0.0118047
	247.5	9334																					0.0117119
	252.5	8065																					0.0101196
	257.5	8726																					0.010949
	262.5	7410																					0.00929773
	267.5	8178																					0.0102614
	272.5	7107																					0.00891754
	277.5	7955																					0.00998157
	282.5	7751																					0.0097256
	287.5	6637																					0.0083278
	292.5	7243																					0.00908818
	297.5	6981																					0.00875944
	302.5	5758																					0.00722487
	307.5	6526																					0.00818852
	312.5	5451																					0.00683966
	317.5	6074																					0.00762138
	322.5	6016																					0.0075486
	327.5	4791																					0.00601153
	332.5	5508																					0.00691118
	337.5	4538																					0.00569407
	342.5	5091																					0.00638795
	347.5	4977																					0.00624491
	352.5	4228																					0.0053051
	357.5	4679																					0.00587099
	362.5	3742																					0.00469529
	367.5	4275																					0.00536407
	372.5	4092																					0.00513445
	377.5	3664																					0.00459742
	382.5	3911																					0.00490734
	387.5	3204																					0.00402023
	392.5	3607																					0.0045259
	397.5	3427																					0.00430004
	402.5	2973																					0.00373038
	407.5	3325																					0.00417206
	412.5	2913																					0.0036551
	417.5	3097																					0.00388597
	422.5	2564																					0.00321719
	427.5	3013																					0.00378057
	432.5	2430																					0.00304905
	437.5	2733																					0.00342924
	442.5	2236																					0.00280563
	447.5	2553																					0.00320339
	452.5	2240																					0.00281065
	457.5	2393																					0.00300263
	462.5	2253																					0.00282696
	467.5	1990																					0.00249696
	472.5	1967																					0.0024681
	477.5	2164																					0.00271529
	482.5	1756																					0.00220335
	487.5	1955																					0.00245304
	492.5	1801																					0.00225981
	497.5	2301																					0.00288719

## Sheet: ZhistActinin
	#	Data	to	plot	the	line	corresponding	to	z	histogram	:	x	=	middle	of	bin,	y	=	nb	of	molecules
	-37.5	1733
	-32.5	2032
	-27.5	2259
	-22.5	2534
	-17.5	3007
	-12.5	3283
	-7.5	4247
	-2.5	3956																				Sum	Frequence
	2.5	4064																				224012	0.0181419
	7.5	4481																					0.0200034
	12.5	4538																					0.0202578
	17.5	4576																					0.0204275
	22.5	4732																					0.0211239
	27.5	4780																					0.0213381
	32.5	5331																					0.0237978
	37.5	4684																					0.0209096
	42.5	4861																					0.0216997
	47.5	4454																					0.0198829
	52.5	4590																					0.02049
	57.5	4577																					0.0204319
	62.5	4992																					0.0222845
	67.5	4235																					0.0189052
	72.5	4370																					0.0195079
	77.5	3968																					0.0177133
	82.5	4263																					0.0190302
	87.5	3934																					0.0175616
	92.5	4680																					0.0208917
	97.5	3824																					0.0170705
	102.5	3772																					0.0168384
	107.5	3618																					0.0161509
	112.5	3732																					0.0166598
	117.5	3656																					0.0163206
	122.5	3975																					0.0177446
	127.5	3321																					0.0148251
	132.5	3342																					0.0149188
	137.5	3321																					0.0148251
	142.5	3562																					0.0159009
	147.5	3063																					0.0136734
	152.5	3105																					0.0138609
	157.5	3057																					0.0136466
	162.5	2796																					0.0124815
	167.5	3058																					0.0136511
	172.5	2791																					0.0124592
	177.5	2543																					0.0113521
	182.5	2650																					0.0118297
	187.5	2698																					0.012044
	192.5	2479																					0.0110664
	197.5	2220																					0.00991018
	202.5	2300																					0.0102673
	207.5	2545																					0.011361
	212.5	2098																					0.00936557
	217.5	2224																					0.00992804
	222.5	2119																					0.00945931
	227.5	2442																					0.0109012
	232.5	2004																					0.00894595
	237.5	2107																					0.00940575
	242.5	1995																					0.00890577
	247.5	1913																					0.00853972
	252.5	1735																					0.00774512
	257.5	1751																					0.00781655
	262.5	1809																					0.00807546
	267.5	1676																					0.00748174
	272.5	1454																					0.00649072
	277.5	1694																					0.00756209
	282.5	1502																					0.006705
	287.5	1487																					0.00663804
	292.5	1513																					0.0067541
	297.5	1529																					0.00682553
	302.5	1290																					0.00575862
	307.5	1268																					0.00566041
	312.5	1384																					0.00617824
	317.5	1284																					0.00573184
	322.5	1220																					0.00544614
	327.5	1298																					0.00579433
	332.5	1231																					0.00549524
	337.5	999																					0.00445958
	342.5	1131																					0.00504884
	347.5	1049																					0.00468278
	352.5	991																					0.00442387
	357.5	990																					0.00441941
	362.5	1065																					0.00475421
	367.5	886																					0.00395515
	372.5	900																					0.00401764
	377.5	999																					0.00445958
	382.5	820																					0.00366052
	387.5	814																					0.00363373
	392.5	814																					0.00363373
	397.5	815																					0.0036382
	402.5	758																					0.00338375
	407.5	731																					0.00326322
	412.5	804																					0.00358909
	417.5	647																					0.00288824
	422.5	605																					0.00270075
	427.5	748																					0.00333911
	432.5	577																					0.00257575
	437.5	670																					0.00299091
	442.5	701																					0.0031293
	447.5	622																					0.00277664
	452.5	571																					0.00254897
	457.5	567																					0.00253111
	462.5	578																					0.00258022
	467.5	542																					0.00241951
	472.5	524																					0.00233916
	477.5	527																					0.00235255
	482.5	522																					0.00233023
	487.5	470																					0.0020981
	492.5	445																					0.0019865
	497.5	565																					0.00252219

[truncated: 5 more sheets: ZhistFLNA, ZhistPax, ZhistTln, ZhistVinc, Fig 1I]
