# Supplementary material for: Nanoscale architecture and coordination of actin cores within the sealing zone of human osteoclasts
Source: eLife. 2022 Jun 21;11:e75610. doi: 10.7554/eLife.75610 (PMC9255968; doi:10.7554/eLife.75610)
Supplement: Figure 2—source data 1. [file elife-75610-fig2-data1.xlsx]

## Sheet: Radii
SEM		normalisé			RIM		normalisé
0	10	0			0	16.125	0
0	30	0			1086	48.375	0.0488134
8	50	0.0175055			6181	80.625	0.277823
59	70	0.129103			7107	112.875	0.319444
86	90	0.188184			3405	145.125	0.153047
98	110	0.214442			1799	177.375	0.0808612
56	130	0.122538			1091	209.625	0.0490381
39	150	0.0853392			685	241.875	0.0307893
37	170	0.0809628			366	274.125	0.0164509
19	190	0.0415755			238	306.375	0.0106976
14	210	0.0306346			118	338.625	0.00530385
4	230	0.00875274			65	370.875	0.00292161
1	250	0.00218818			37	403.125	0.00166307
2	270	0.00437637			32	435.375	0.00143833
0	290	0			15	467.625	0.000674218
0	310	0			13	499.875	0.000584322
0	330	0			3	532.125	0.000134844
0	350	0			1	564.375	4.49479e-05
0	370	0			5	596.625	0.000224739
0	390	0			0	628.875	0
1	410	0.00218818			1	661.125	4.49479e-05
0	430	0			0	693.375	0
1	450	0.00218818			0	725.625	0
1	470	0.00218818			0	757.875	0
3	490	0.00656455			0	790.125	0
1	510	0.00218818			0	822.375	0
2	530	0.00437637			0	854.625	0
2	550	0.00437637			0	886.875	0
2	570	0.00437637			0	919.125	0
1	590	0.00218818			0	951.375	0
3	610	0.00656455			0	983.625	0
0	630	0
1	650	0.00218818
1	670	0.00218818
2	690	0.00437637
1	710	0.00218818
2	730	0.00437637
2	750	0.00437637
1	770	0.00218818
1	790	0.00218818
0	810	0
1	830	0.00218818
0	850	0
0	870	0
0	890	0
1	910	0.00218818
0	930	0
1	950	0.00218818
1	970	0.00218818
1	990	0.00218818
1	1010	0.00218818

## Sheet: All neighbours
SEM		normalisé			RIM		normalisé
0	25	0			0	16.125	0
0	75	0			0	48.375	0
2	125	0.000864304			0	80.625	0
14	175	0.00605013			0	112.875	0
46	225	0.019879			0	145.125	0
84	275	0.0363008			24	177.375	0.00153836
94	325	0.0406223			62	209.625	0.0039741
88	375	0.0380294			136	241.875	0.00871739
122	425	0.0527226			264	274.125	0.016922
116	475	0.0501296			370	306.375	0.0237164
138	525	0.059637			442	338.625	0.0283315
161	575	0.0695765			494	370.875	0.0316646
145	625	0.0626621			578	403.125	0.0370489
128	675	0.0553155			628	435.375	0.0402538
137	725	0.0592048			646	467.625	0.0414076
124	775	0.0535869			622	499.875	0.0398692
119	825	0.0514261			611	532.125	0.0391642
104	875	0.0449438			690	564.375	0.0442279
88	925	0.0380294			682	596.625	0.0437151
60	975	0.0259291			646	628.875	0.0414076
60	1025	0.0259291			575	661.125	0.0368566
57	1075	0.0246327			595	693.375	0.0381386
42	1125	0.0181504			547	725.625	0.0350619
40	1175	0.0172861			468	757.875	0.0299981
34	1225	0.0146932			527	790.125	0.0337799
26	1275	0.011236			515	822.375	0.0330107
6	1325	0.00259291			460	854.625	0.0294853
22	1375	0.00950735			392	886.875	0.0251266
20	1425	0.00864304			366	919.125	0.02346
25	1475	0.0108038			362	951.375	0.0232036
14	1525	0.00605013			306	983.625	0.0196141
6	1575	0.00259291			322	1015.88	0.0206397
8	1625	0.00345722			223	1048.12	0.014294
6	1675	0.00259291			259	1080.38	0.0166015
2	1725	0.000864304			238	1112.62	0.0152554
0	1775	0			191	1144.88	0.0122428
4	1825	0.00172861			186	1177.12	0.0119223
4	1875	0.00172861			151	1209.38	0.00967887
4	1925	0.00172861			162	1241.62	0.0103839
4	1975	0.00172861			134	1273.88	0.00858919
6	2025	0.00259291			114	1306.12	0.00730722
0	2075	0			135	1338.38	0.00865329
0	2125	0			102	1370.62	0.00653804
6	2175	0.00259291			98	1402.88	0.00628165
2	2225	0.000864304			87	1435.12	0.00557657
0	2275	0			62	1467.38	0.0039741
4	2325	0.00172861			78	1499.62	0.00499968
2	2375	0.000864304			74	1531.88	0.00474329
4	2425	0.00172861			56	1564.12	0.00358951
4	2475	0.00172861			60	1596.38	0.00384591
4	2525	0.00172861			46	1628.62	0.00294853
0	2575	0			38	1660.88	0.00243574
4	2625	0.00172861			54	1693.12	0.00346132
6	2675	0.00259291			13	1725.38	0.00083328
0	2725	0			26	1757.62	0.00166656
2	2775	0.000864304			40	1789.88	0.00256394
2	2825	0.000864304			28	1822.12	0.00179476
2	2875	0.000864304			32	1854.38	0.00205115
2	2925	0.000864304			26	1886.62	0.00166656
2	2975	0.000864304			21	1918.88	0.00134607
0	3025	0			26	1951.12	0.00166656
0	3075	0			26	1983.38	0.00166656
2	3125	0.000864304			20	2015.62	0.00128197
2	3175	0.000864304			10	2047.88	0.000640985
0	3225	0			22	2080.12	0.00141017
2	3275	0.000864304			28	2112.38	0.00179476
4	3325	0.00172861			24	2144.62	0.00153836
4	3375	0.00172861			18	2176.88	0.00115377
0	3425	0			20	2209.12	0.00128197
2	3475	0.000864304			14	2241.38	0.000897378
8	3525	0.00345722			22	2273.62	0.00141017
4	3575	0.00172861			6	2305.88	0.000384591
0	3625	0			14	2338.12	0.000897378
0	3675	0			8	2370.38	0.000512788
4	3725	0.00172861			10	2402.62	0.000640985
4	3775	0.00172861			14	2434.88	0.000897378
0	3825	0			12	2467.12	0.000769181
4	3875	0.00172861			10	2499.38	0.000640985
4	3925	0.00172861			12	2531.62	0.000769181
0	3975	0			18	2563.88	0.00115377
6	4025	0.00259291			8	2596.12	0.000512788
4	4075	0.00172861			8	2628.38	0.000512788
6	4125	0.00259291			10	2660.62	0.000640985
6	4175	0.00259291			10	2692.88	0.000640985
0	4225	0			4	2725.12	0.000256394
4	4275	0.00172861			8	2757.38	0.000512788
4	4325	0.00172861			4	2789.62	0.000256394
0	4375	0			2	2821.88	0.000128197
0	4425	0			8	2854.12	0.000512788
0	4475	0			3	2886.38	0.000192295
2	4525	0.000864304			8	2918.62	0.000512788
0	4575	0			8	2950.88	0.000512788
0	4625	0			6	2983.12	0.000384591
0	4675	0			2	3015.38	0.000128197
2	4725	0.000864304			4	3047.62	0.000256394
2	4775	0.000864304			6	3079.88	0.000384591
2	4825	0.000864304			6	3112.12	0.000384591
0	4875	0			4	3144.38	0.000256394
0	4925	0			2	3176.62	0.000128197
0	4975	0			6	3208.88	0.000384591
2	5025	0.000864304			10	3241.12	0.000640985
4	5075	0.00172861			2	3273.38	0.000128197
0	5125	0			2	3305.62	0.000128197
0	5175	0			2	3337.88	0.000128197
0	5225	0			2	3370.12	0.000128197
2	5275	0.000864304			0	3402.38	0
2	5325	0.000864304			4	3434.62	0.000256394
0	5375	0			10	3466.88	0.000640985
4	5425	0.00172861			10	3499.12	0.000640985
2	5475	0.000864304			4	3531.38	0.000256394
0	5525	0			0	3563.62	0
0	5575	0			2	3595.88	0.000128197
0	5625	0			8	3628.12	0.000512788
0	5675	0			2	3660.38	0.000128197
0	5725	0			6	3692.62	0.000384591
2	5775	0.000864304			0	3724.88	0
0	5825	0			4	3757.12	0.000256394
2	5875	0.000864304			0	3789.38	0
0	5925	0			6	3821.62	0.000384591
0	5975	0			2	3853.88	0.000128197
0	6025	0			4	3886.12	0.000256394
0	6075	0			4	3918.38	0.000256394
0	6125	0			0	3950.62	0
2	6175	0.000864304			2	3982.88	0.000128197
0	6225	0			0	4015.12	0
0	6275	0
2	6325	0.000864304
0	6375	0
0	6425	0
2	6475	0.000864304

## Sheet: 1st neighbours
)		normalisé			RIM		normalisé
0	75	0			0	16.125	0
2	125	0.00437637			0	48.375	0
12	175	0.0262582			0	80.625	0
40	225	0.0875274			0	112.875	0
60	275	0.131291			0	145.125	0
42	325	0.0919037			24	177.375	0.00865801
35	375	0.0765864			57	209.625	0.0205628
47	425	0.102845			125	241.875	0.0450938
34	475	0.0743982			217	274.125	0.0782828
39	525	0.0853392			270	306.375	0.0974026
29	575	0.0634573			265	338.625	0.0955988
16	625	0.0350109			270	370.875	0.0974026
19	675	0.0415755			274	403.125	0.0988456
13	725	0.0284464			233	435.375	0.0840548
6	775	0.0131291			205	467.625	0.0739538
6	825	0.0131291			137	499.875	0.0494228
9	875	0.0196937			126	532.125	0.0454545
6	925	0.0131291			106	564.375	0.0382395
4	975	0.00875274			76	596.625	0.027417
1	1025	0.00218818			75	628.875	0.0270563
0	1075	0			35	661.125	0.0126263
1	1125	0.00218818			54	693.375	0.0194805
3	1175	0.00656455			37	725.625	0.0133478
0	1225	0			28	757.875	0.010101
2	1275	0.00437637			32	790.125	0.011544
1	1325	0.00218818			14	822.375	0.00505051
0	1375	0			13	854.625	0.00468975
0	1425	0			18	886.875	0.00649351
2	1475	0.00437637			10	919.125	0.0036075
0	1525	0			11	951.375	0.00396825
0	1575	0			11	983.625	0.00396825
0	1625	0			6	1015.88	0.0021645
0	1675	0			5	1048.12	0.00180375
0	1725	0			4	1080.38	0.001443
0	1775	0			2	1112.62	0.000721501
0	1825	0			5	1144.88	0.00180375
0	1875	0			5	1177.12	0.00180375
2	1925	0.00437637			3	1209.38	0.00108225
0	1975	0			8	1241.62	0.002886
4	2025	0.00875274			4	1273.88	0.001443
0	2075	0			2	1306.12	0.000721501
0	2125	0			0	1338.38	0
2	2175	0.00437637			2	1370.62	0.000721501
2	2225	0.00437637			0	1402.88	0
0	2275	0			1	1435.12	0.00036075
2	2325	0.00437637			2	1467.38	0.000721501
0	2375	0			0	1499.62	0
2	2425	0.00437637
1	2475	0.00218818
2	2525	0.00437637
0	2575	0
1	2625	0.00218818
0	2675	0
0	2725	0
0	2775	0
1	2825	0.00218818
0	2875	0
0	2925	0
0	2975	0
0	3025	0
0	3075	0
0	3125	0
0	3175	0
0	3225	0
0	3275	0
3	3325	0.00656455
1	3375	0.00218818
0	3425	0
1	3475	0.00218818
1	3525	0.00218818
1	3575	0.00218818
0	3625	0
0	3675	0
0	3725	0
0	3775	0
0	3825	0
0	3875	0
0	3925	0
0	3975	0
0	4025	0
1	4075	0.00218818
0	4125	0
0	4175	0
0	4225	0
0	4275	0
0	4325	0
0	4375	0
0	4425	0
0	4475	0
0	4525	0
0	4575	0
0	4625	0
0	4675	0
0	4725	0
0	4775	0
0	4825	0
0	4875	0
0	4925	0
0	4975	0
0	5025	0
0	5075	0
0	5125	0
0	5175	0
0	5225	0
0	5275	0
0	5325	0
0	5375	0
1	5425	0.00218818
0	5475	0
