# Supplementary material for: Nanoscale architecture and coordination of actin cores within the sealing zone of human osteoclasts
Source: eLife. 2022 Jun 21;11:e75610. doi: 10.7554/eLife.75610 (PMC9255968; doi:10.7554/eLife.75610)
Supplement: Figure 3—source data 1. [file elife-75610-fig3-data1.xlsx]

## Sheet: Feuil1
1	53208.2	1	54874	1	57670.3	0
2	53256.6	2	55202.2	2	57861.6	2.4
3	53261.4	3	55110.9	3	58083.2	4.8
4	53497.4	4	55192.4	4	58206.3	7.2
5	53227.7	5	55640.4	5	58197.1	9.6
6	53094.5	6	55583.3	6	58014.8	12
7	53123.5	7	55583.4	7	57889.6	14.4
8	53413.3	8	55619.2	8	57933.1	16.8
9	53420.9	9	55358.7	9	57676.2	19.2
10	54210.6	10	55552.8	10	57924.9	21.6
11	54559.4	11	55230.3	11	57712.1	24
12	55091.6	12	54768.6	12	57797.2	26.4
13	54892.5	13	54322.2	13	58281.7	28.8
14	55073.6	14	54268.3	14	58771.1	31.2
15	55364.1	15	54121.4	15	58754.2	33.6
16	55178.4	16	53731.8	16	58990.4	36
17	55245.7	17	53104.1	17	59376.8	38.4
18	55268.7	18	52887.7	18	59388	40.8
19	55560.7	19	52376.4	19	59532.7	43.2
20	55150.9	20	51924.6	20	59866	45.6
21	54820	21	52036.1	21	60372.7	48
22	54629.7	22	52470.2	22	60431.2	50.4
23	54569.6	23	52035.8	23	61050.8	52.8
24	54581.8	24	51756.9	24	61039.2	55.2
25	53892.5	25	51500.5	25	61468.8	57.6
26	54339.6	26	51511.9	26	61787.5	60
27	53979.8	27	51059.4	27	61955.4	62.4
28	53830.7	28	50654.3	28	62110.7	64.8
29	53895.5	29	50507.2	29	62197.6	67.2
30	54172.9	30	49915	30	61774	69.6
31	53779.9	31	49590.2	31	61617.8	72
32	53338.3	32	48537	32	61328.3	74.4
33	52865	33	47890.9	33	61523.1	76.8
34	52529	34	47645.5	34	61636.2	79.2
35	52305.9	35	46997.5	35	61922	81.6
36	51891.9	36	46709.4	36	62141.4	84
37	51030.1	37	46876.8	37	62103.1	86.4
38	50569.1	38	46781.1	38	61996.2	88.8
39	50216.2	39	46616.8	39	61943.4	91.2
40	49527.3	40	46428.7	40	61793.2	93.6
41	49600.5	41	46191.8	41	62136	96
42	49658.4	42	46096.7	42	62525.5	98.4
43	49389	43	45873.1	43	62571	100.8
44	50017.7	44	45566.1	44	62242.2	103.2
45	50303.4	45	45527.2	45	62489.3	105.6
46	50149.5	46	45503.5	46	62583.2	108
47	50654.1	47	45461.8	47	62696.3	110.4
48	51492.1	48	45795.5	48	62533.4	112.8
49	52406.9	49	46148.9	49	62633.8	115.2
50	52069.4	50	46239.6	50	62511.4	117.6
51	52535.9	51	46470.8	51	62523.1	120
52	52600.6	52	46602.7	52	62415.6	122.4
53	53107.9	53	46604	53	62486.4	124.8
54	53098.7	54	46830.2	54	61971.2	127.2
55	53637.9	55	47148.5	55	61577.3	129.6
56	54072	56	47765.9	56	61499.8	132
57	54250.1	57	47968.8	57	61058.4	134.4
58	54524.1	58	48239.2	58	60786	136.8
59	54750.6	59	49170.4	59	60680.7	139.2
60	55075.9	60	49863	60	60658.3	141.6
61	55254.7	61	50450.8	61	60307.4	144
62	55240.2	62	50535.6	62	60098.4	146.4
63	55394.3	63	51347.8	63	60110.3	148.8
64	55366.1	64	51811.8	64	60126.2	151.2
65	55493.9	65	51930.3	65	59970.2	153.6
66	55433.2	66	51874.9	66	60067.3	156
67	55915.5	67	52324.8	67	59828	158.4
68	56136	68	53090.7	68	59553.6	160.8
69	56029.5	69	53672.9	69	59852.5	163.2
70	55930.5	70	53474.2	70	59110	165.6
71	55669.1	71	54429.8	71	59273.1	168
72	55705.1	72	54798.8	72	59579.6	170.4
73	55581.8	73	55048	73	59216.2	172.8
74	55572.2	74	54990.3	74	59011	175.2
75	55532.4	75	55181.5	75	58692.8	177.6
76	55241.6	76	55247.1	76	58939.1	180
77	55296.5	77	54999	77	58646.2	182.4
78	55082.2	78	54970.8	78	58599	184.8
79	54763	79	54764.2	79	58673.2	187.2
80	54788.3	80	54678.7	80	58903.9	189.6
81	54254.3	81	54062.7	81	58731	192
82	54829.8	82	54393.2	82	59219.5	194.4
83	54562.3	83	54557.7	83	59180.7	196.8
84	54885.1	84	54851.6	84	59317.6	199.2
85	54588	85	55196.6	85	59277	201.6
86	54464.3	86	55255.6	86	59151.3	204
87	54961.9	87	54619.3	87	59360.7	206.4
88	54142.2	88	53506.7	88	59646.2	208.8
89	54121.6	89	52569.8	89	59965	211.2
90	54694.2	90	52750.2	90	59440.7	213.6
