# Supplementary material for: Nanoscale architecture and coordination of actin cores within the sealing zone of human osteoclasts
Source: eLife. 2022 Jun 21;11:e75610. doi: 10.7554/eLife.75610 (PMC9255968; doi:10.7554/eLife.75610)
Supplement: Figure 3—source data 2. [file elife-75610-fig3-data2.xlsx]

## Sheet: Feuil1
0.11087	-0.01098	-0.00445	0.0019	0.00037	-0.00242	-4e-05	-0.00013	0.00043	2e-05	0.00013	-0.00047	0.00025	-0.00054	-0.00141	-0.00022	-0.00015	-0.00013	0.00034	-0.0001	0.00058	-0.00064	-8e-05	3e-05	-0.00043	-0.00102	-0.00079	-9e-05	0.00034	0.0001
0.36423	-0.01671	-0.00765	-0.00317	0.00049	0.00307	0.0004	0.00033	-0.00155	-0.00072	-0.00019	0.00053	0.00027	0.00079	0.00145	-0.00077	-0.00027	0.00045	0.00037	-0.00122	0.00062	-0.00151	-0.00011	0.00066	0.00105	-0.00208	0.00191	0.0001	0.0009	-0.00015
0.36969	-0.03587	0.00882	0.00409	0.00212	-0.00308	0.00149	0.0008	0.0017	-0.00123	-0.00199	0.00074	-0.00121	-0.00099	0.00227	0.0008	-0.00031	0.00093	-0.00047	-0.00142	0.00073	-0.00167	0.00054	0.00127	0.00109	-0.00235	0.00222	-0.00022	0.001	0.00031
0.40037	-0.04026	0.01117	-0.0042	0.00227	-0.00372	-0.00184	0.00147	0.00188	-0.00168	-0.00224	0.00141	0.00129	-0.0012	0.00234	0.00116	-0.00053	0.00105	0.00054	0.00145	0.00116	0.00239	-0.00056	0.00188	-0.0012	0.00242	-0.00225	0.00085	0.00108	-0.00039
0.41853	-0.06059	-0.01374	0.00484	0.00486	0.00426	-0.00246	0.00149	-0.00201	-0.00223	0.00239	-0.0015	0.00135	-0.0012	0.00376	0.0015	0.00065	0.00136	-0.00055	0.00153	0.0012	-0.00268	0.00086	-0.00229	0.00126	0.00253	-0.00295	0.00109	0.00127	-0.00068
0.44317	0.0638	-0.01994	0.00489	-0.0057	0.00458	0.00249	0.00215	0.00254	-0.00282	0.00241	0.00196	0.00138	-0.00249	-0.00395	-0.00162	0.00115	0.00223	0.00061	0.00174	-0.00153	0.00276	-0.00095	-0.00239	-0.00195	0.0029	0.00361	0.00115	0.00152	-0.00198
0.5008	-0.08254	0.02328	-0.00612	-0.00594	-0.00518	0.003	-0.00222	0.00257	-0.00299	0.0029	0.00219	0.00197	-0.00261	0.0042	0.00182	-0.0012	-0.00231	0.0009	0.00231	0.00169	-0.00349	-0.00095	0.0031	-0.00263	0.0035	-0.00386	-0.00194	-0.00166	0.00208
0.51646	0.09221	-0.03371	0.00624	-0.00653	-0.00551	-0.00338	-0.00258	0.00292	0.00319	0.00293	-0.00252	-0.0022	-0.00286	0.00452	-0.00239	0.00142	0.0026	-0.0013	0.00291	-0.0019	-0.00412	-0.0015	-0.00326	-0.00267	0.00367	-0.00401	0.00196	-0.00203	0.00216
0.60641	0.09947	0.03412	-0.00729	-0.0066	0.00678	-0.00368	0.00281	-0.00294	-0.00438	0.00297	0.00262	-0.00268	0.00292	-0.00463	0.00243	0.00142	-0.00266	0.00147	-0.00295	-0.00193	0.0046	0.00156	0.00334	-0.00325	0.0037	-0.00436	0.00256	0.00218	0.00216
0.63033	0.10137	0.03522	0.00752	0.00672	0.00711	0.00465	0.00326	-0.00331	0.00458	0.00302	-0.00315	-0.00287	-0.00306	-0.00517	-0.00291	-0.00147	0.0034	-0.00178	0.00316	0.00258	0.00471	-0.00195	0.00462	-0.00364	0.00393	0.00505	-0.00295	0.00242	-0.00342
0.6445	0.1057	-0.03528	-0.0083	0.00677	-0.00758	0.00643	-0.00352	-0.0055	-0.00459	-0.00349	0.00325	0.00338	-0.00306	0.0056	-0.00293	0.00174	-0.00361	0.00289	-0.00349	0.00264	-0.00492	0.00213	-0.00606	0.00369	-0.00405	-0.00522	-0.00308	-0.00253	-0.00366
0.67071	0.11268	-0.0353	-0.00833	0.00678	-0.00758	0.00762	0.00519	0.00571	0.00487	-0.00392	-0.00397	-0.00353	0.0039	-0.0056	-0.00367	-0.00202	0.0039	0.00318	-0.00358	-0.00279	-0.00528	-0.00222	-0.00647	-0.00374	-0.00407	0.00543	0.00335	0.0034	-0.00367
0.67274	0.12652	-0.03545	0.00842	-0.00798	-0.00808	0.00829	0.00524	-0.00637	-0.00516	0.00565	-0.00426	-0.00396	0.00464	0.00573	0.0039	-0.00216	-0.00411	-0.00332	0.00394	0.00318	0.00566	0.0023	0.00667	0.00398	-0.00424	-0.00579	0.00382	-0.00361	0.00387
0.67481	-0.13289	0.03941	-0.00878	0.00829	-0.00836	-0.00864	0.00669	0.00807	0.00577	-0.00609	-0.00445	-0.00402	0.00493	-0.00593	0.00444	0.00232	-0.00439	0.00376	0.00398	0.0035	0.0059	-0.00243	0.00711	0.00406	-0.0044	-0.006	-0.00429	-0.00372	0.00405
0.67869	0.14585	0.05026	0.00922	-0.00955	-0.00952	-0.0093	0.00687	-0.00817	-0.00612	0.00697	0.00458	0.00417	-0.00493	-0.00732	-0.00502	-0.00236	-0.00492	-0.00376	-0.00443	0.00454	-0.00593	0.00278	-0.00716	-0.0044	0.00452	-0.00633	0.00435	-0.0047	0.00498
0.81231	0.14799	-0.05155	0.01058	-0.00956	0.01039	-0.01005	0.0071	-0.00822	-0.00739	-0.00734	-0.00503	-0.00513	-0.0056	0.00745	-0.00533	0.00237	-0.00532	-0.00433	-0.00504	0.00476	0.00598	-0.00303	0.00735	-0.00454	0.00478	0.00656	-0.00452	-0.00491	-0.00547
0.81811	0.14998	0.05438	0.01095	-0.01075	-0.01167	0.01044	-0.00763	0.01014	-0.00756	-0.0074	-0.00585	-0.00533	0.00592	0.0075	0.00562	-0.00243	-0.00539	0.00435	-0.00518	0.00483	0.00603	0.00313	-0.00797	0.00476	0.00536	0.00696	0.00475	0.00526	-0.00591
0.84662	-0.15974	0.05548	-0.01388	0.01145	0.01232	0.0106	-0.0111	0.01015	0.0087	-0.00763	-0.00627	-0.00563	-0.00631	-0.00755	0.00576	0.00254	-0.00552	-0.00494	0.00609	-0.00513	-0.00608	0.00371	0.00804	0.00559	-0.00578	-0.00758	-0.00605	-0.00534	-0.00609
0.86389	0.18382	0.05976	-0.01879	-0.01166	0.01243	0.01065	0.01134	-0.01069	-0.00942	0.00794	0.00654	-0.00663	-0.00638	-0.0082	0.00642	-0.00255	0.00646	0.00507	0.00654	-0.0053	0.00614	0.0038	0.00883	0.00595	-0.0061	-0.00825	0.00619	-0.00538	-0.00612
0.89396	0.18827	0.06042	0.01951	0.01238	-0.0126	-0.01245	-0.01154	0.01099	-0.0103	-0.00867	0.0066	0.00736	0.00667	-0.00833	-0.00657	0.00303	-0.00653	0.00517	0.00655	-0.00534	0.00636	0.00421	-0.00885	-0.00608	-0.00652	0.00828	0.00631	0.00584	0.00702
0.90602	0.21492	0.06195	-0.02106	0.01407	-0.01332	-0.01373	-0.01179	-0.01127	0.0104	-0.00912	0.00671	0.00752	0.00747	0.00925	0.00687	0.00346	0.00674	-0.0052	0.00681	-0.00534	-0.00639	-0.0045	0.0089	-0.00621	0.00657	-0.00829	-0.00692	0.00593	-0.0074
0.93187	0.22539	-0.06197	0.02215	0.01522	0.01395	-0.01509	-0.01269	-0.01141	0.01116	-0.00999	-0.00676	-0.00791	-0.0075	0.00957	-0.00693	-0.00347	-0.00693	-0.00534	-0.00753	0.00543	-0.00728	0.00455	0.00947	0.00662	0.0066	-0.00861	0.00697	-0.00614	-0.00777
0.96379	0.23496	-0.0653	0.02418	0.01602	-0.0143	-0.01579	0.01286	-0.01148	0.01129	0.01011	-0.00692	0.00801	-0.00764	-0.00982	-0.00887	0.00348	-0.00778	-0.00542	0.00793	0.00544	-0.00738	0.00492	0.01005	-0.00665	0.00661	0.00865	-0.00697	0.00674	0.0079
0.96711	-0.24246	0.06546	-0.02438	0.01861	0.01504	0.01604	0.01342	0.01176	0.01157	0.01079	0.00712	-0.00811	-0.00766	0.00999	0.0092	-0.00353	-0.00785	0.00545	0.0082	0.00563	0.0075	-0.00501	-0.01008	0.00676	0.00667	0.00887	0.00726	-0.00728	0.00808
	0.25059	-0.06582	0.02486	0.01967	-0.01576	0.01842	0.01511	0.01188	-0.01163	0.01096	-0.00807	-0.00833	-0.00796	-0.01007	0.00947	-0.00387	0.00788	-0.00551	-0.00849	0.00569	0.00811	-0.00504	-0.01013	0.00729	-0.00674	0.00899	-0.00732	-0.00735	-0.00841
	0.2601	0.06962	-0.02668	-0.02069	0.01618	0.0186	-0.01548	-0.0122	-0.01179	-0.01171	-0.00853	0.00867	0.00823	-0.01011	0.00963	-0.0045	0.00798	-0.00628	-0.00863	0.00671	0.00828	0.00539	0.01042	0.00772	0.0071	-0.00904	0.0078	-0.00747	0.00864
	0.26402	0.0712	-0.02701	0.02172	-0.01703	-0.01881	0.01735	0.01271	-0.01287	-0.01261	-0.00903	-0.01	-0.00824	0.01015	-0.00985	0.00484	0.00913	-0.00633	0.00891	-0.00698	0.00873	0.0057	-0.01063	0.00801	-0.00803	0.00911	0.00833	0.00821	-0.00877
	0.27575	-0.07212	0.02797	-0.02206	-0.018	-0.0195	-0.01853	-0.01284	0.01318	-0.0136	0.00981	0.01029	0.00835	0.01066	0.00999	0.00491	0.00951	-0.00633	0.0092	0.00721	-0.00873	-0.00588	0.01064	0.00844	-0.00812	0.00937	-0.00858	-0.00849	0.00879
	0.29568	0.07304	0.03022	-0.02237	0.01821	0.0202	0.01856	-0.01732	0.01366	0.01422	-0.01021	-0.01033	0.00873	-0.01165	-0.01052	-0.00572	0.00953	0.00638	-0.0094	-0.0073	-0.00873	0.00634	0.01084	0.0085	0.00888	0.00939	0.0089	-0.00857	0.00918
	0.30021	0.07599	0.03122	0.02307	-0.0198	0.02047	0.01955	-0.01789	-0.01371	-0.01524	0.01032	0.01087	-0.00906	0.01189	-0.01087	-0.00596	-0.01028	-0.00697	-0.00957	0.00744	-0.00881	-0.00648	0.01094	0.00872	0.0095	0.00982	-0.00954	0.00932	-0.00949
	-0.30058	0.07697	0.03269	-0.02313	0.02013	-0.02075	0.01987	-0.01825	0.01391	-0.01572	-0.01052	0.01102	-0.01018	0.01223	-0.01142	-0.00609	-0.01045	-0.00711	-0.00994	-0.00753	0.00983	-0.00653	0.01134	0.00885	0.00976	-0.00984	-0.00961	-0.00952	-0.00953
	0.31723	0.07791	0.03289	0.0246	-0.02125	-0.02123	-0.01992	0.01886	0.01407	0.01574	0.01083	0.01115	-0.01066	0.0123	-0.01212	-0.00616	-0.01056	0.00776	-0.01011	-0.00762	0.01011	0.00666	0.01168	-0.00892	-0.00981	0.00989	0.00968	-0.00955	0.00971
	0.33393	-0.07868	-0.03308	0.02477	-0.02333	0.02144	-0.02043	0.01906	-0.01474	0.01576	0.01124	-0.01115	-0.01119	0.01248	0.01213	0.00633	0.01057	-0.00796	0.01014	-0.00772	0.01011	0.00772	-0.01189	-0.00896	-0.01008	0.00992	0.01054	-0.00963	-0.01004
	-0.33546	0.08388	-0.0337	0.02535	-0.02442	-0.02183	0.02067	-0.01924	0.01478	0.01578	0.01213	0.01183	-0.01136	0.01297	0.01221	-0.00646	-0.01063	0.00819	-0.01055	0.00904	-0.01013	-0.00781	-0.01232	-0.00904	0.01064	0.01042	0.01164	0.00979	-0.01023
	0.33721	0.09275	-0.03375	0.02755	0.02517	0.02186	-0.02102	-0.01943	0.01571	0.01619	0.01217	-0.01315	0.01149	0.01327	-0.01258	-0.00718	0.01069	0.00829	-0.01087	0.00938	-0.01111	-0.00782	-0.0125	-0.00934	0.01088	0.0108	-0.01176	-0.00993	-0.01082
	0.33878	0.09477	-0.03445	-0.0276	0.02521	0.02209	-0.02133	-0.02063	0.01582	0.01638	-0.01221	0.01317	0.01156	0.01377	-0.01266	0.00724	0.01105	0.00836	-0.01094	-0.00939	-0.01127	0.00786	0.01262	0.00946	0.0109	0.01111	-0.012	0.00998	0.01125
	0.35066	-0.09575	0.03463	0.02844	0.02568	0.02249	0.02174	0.02073	0.01668	-0.01789	-0.01314	-0.01356	0.01157	-0.01398	-0.01306	-0.00726	0.0115	-0.00873	0.0125	0.0099	0.01152	0.00861	0.01274	-0.00952	-0.01126	-0.01118	0.01234	-0.01092	-0.01133
	0.35325	0.09782	-0.03566	-0.02918	0.02597	-0.02282	0.02237	-0.02108	-0.0174	-0.01858	-0.01321	0.01387	0.01175	0.01399	0.01312	-0.00727	-0.01174	-0.0092	-0.0125	-0.01014	-0.01167	0.00917	0.01286	-0.00954	0.01168	-0.01125	0.01242	-0.01127	0.01136
	-0.35804	0.10062	0.03588	-0.03048	0.02823	0.02316	0.02273	0.02147	0.01752	0.01895	0.01382	-0.01403	-0.01178	0.01464	0.01323	0.00772	-0.01181	-0.01004	0.01328	-0.01017	0.01185	0.01008	-0.01316	0.01019	-0.01229	0.01135	0.01269	0.01216	-0.01178
	0.36067	-0.1013	-0.0379	0.03058	0.0297	0.02325	-0.02291	0.02152	-0.01785	0.01916	0.01552	-0.01407	0.01332	0.01466	-0.01339	0.00791	0.01218	-0.0102	-0.01342	-0.01028	-0.01226	-0.01028	0.01358	-0.01028	-0.01234	-0.01188	-0.01281	0.01235	0.012
	0.36348	-0.10617	-0.03943	0.03077	0.03105	0.02334	0.02376	0.02243	-0.0179	0.02024	0.01557	-0.01413	0.01359	-0.01546	-0.01354	-0.00822	-0.01307	-0.0102	0.01391	-0.0107	-0.01229	0.01046	-0.01383	-0.01051	0.01253	0.01207	0.01309	0.01348	-0.01204
	0.3747	0.10882	0.04123	0.03109	0.03203	-0.02369	-0.02376	0.02244	0.01822	0.02053	0.01579	-0.01424	-0.01409	0.0155	0.01408	-0.00837	-0.01351	-0.01029	-0.01425	-0.01145	-0.0124	-0.01056	0.01384	0.01084	-0.01263	0.01208	0.01346	0.01356	0.01232
	0.37737	-0.10907	-0.0444	-0.03231	-0.03203	-0.02371	-0.02393	0.02284	0.01826	0.02079	0.01627	0.01458	0.01456	0.01557	0.01423	-0.00849	-0.0136	0.01032	0.01465	-0.01173	-0.01254	-0.01067	-0.01406	-0.01088	-0.01277	-0.01221	-0.01351	-0.01375	-0.01253
	0.37816	-0.115	-0.04586	0.03273	-0.03206	-0.02468	0.0245	0.02293	0.01888	0.02107	0.01628	0.01471	-0.01459	0.01569	-0.01433	-0.00905	0.01424	-0.01044	0.01508	0.01182	0.01255	0.01094	-0.01412	0.01095	0.01292	-0.01257	-0.0136	0.01399	-0.01256
	0.3806	-0.11603	0.04912	0.03283	0.03218	0.02604	0.02454	0.02453	0.01929	0.02232	-0.01659	-0.01472	0.01529	0.01597	0.01438	-0.0095	0.01434	-0.01099	0.01557	0.01206	0.01275	-0.01106	0.01443	0.01102	0.01296	-0.01261	0.01422	-0.0143	-0.013
	0.38178	0.12061	0.05021	0.03433	-0.03258	-0.02764	0.02728	-0.02471	0.01947	0.02249	0.01661	-0.01481	-0.01579	-0.01626	0.01494	0.00955	0.01434	0.0113	0.01594	0.01209	-0.01309	-0.01128	0.01458	-0.01119	-0.01355	-0.01344	0.01434	0.01455	-0.0144
	0.38366	0.12653	-0.0518	0.03464	-0.03336	0.02847	0.02781	-0.02562	-0.01987	-0.02278	-0.01707	0.01647	-0.01582	0.01653	0.01525	-0.01026	-0.01443	-0.01156	0.01652	0.01234	0.01325	0.01148	-0.01469	-0.0118	0.0138	0.01352	-0.01453	-0.0148	-0.01461
	-0.39263	-0.12744	-0.05193	0.03468	0.03373	-0.02878	0.02804	-0.02578	-0.02044	0.02279	0.01708	0.01662	0.01628	-0.01681	0.01539	0.01097	-0.01513	0.01171	-0.01658	0.01238	-0.01329	-0.01182	-0.01495	-0.01207	-0.0141	0.01437	0.0146	-0.01525	-0.01472
	0.39659	0.13157	0.05303	-0.03499	-0.03462	0.02888	-0.02842	0.02591	-0.02049	0.02325	0.01752	-0.01672	-0.01663	-0.01717	0.01549	0.0111	0.01523	0.01181	0.01675	-0.0127	-0.01352	-0.01187	-0.01498	0.01209	0.01425	-0.01502	-0.01472	-0.01531	0.01484
	0.40005	-0.13673	-0.05439	-0.03574	-0.03468	-0.02943	-0.0285	-0.02664	0.02058	-0.02474	-0.01764	-0.01699	-0.01753	0.01748	-0.0156	0.01131	0.01551	-0.01185	-0.01714	-0.01293	0.01364	0.01188	0.01506	-0.01224	-0.01484	0.01599	0.01485	-0.01544	0.01495
	0.41742	0.13877	0.05507	0.03729	0.03478	-0.03031	0.02857	0.02682	-0.02094	-0.02479	0.01783	-0.017	0.01765	-0.0182	0.01585	-0.01314	0.01553	0.01239	-0.01739	0.01307	0.01395	0.01194	-0.01513	0.01243	-0.0149	-0.01632	-0.01518	-0.01659	0.01614
	0.42482	-0.14808	0.0553	0.03779	-0.03627	0.03172	-0.0286	0.02797	0.02169	-0.02536	0.01879	0.01725	-0.01775	-0.01868	0.01587	-0.01317	0.01573	-0.01276	-0.01743	0.01307	-0.01429	-0.01213	0.01658	-0.01247	0.01492	0.01681	-0.01541	0.01665	0.01637
	0.44159	0.14836	0.05771	0.03844	0.03753	-0.03184	0.02878	0.02823	-0.02198	0.02649	0.01899	0.01747	-0.01795	0.01947	-0.01619	-0.01325	-0.01628	-0.01305	0.01745	-0.01308	-0.01446	-0.01225	0.01659	-0.01248	-0.01553	0.01719	0.01549	0.01673	-0.01652
	0.45268	-0.15003	0.0582	-0.0389	0.03765	-0.03187	-0.02933	0.02885	-0.02201	0.02819	-0.01936	-0.01765	0.01804	0.02024	-0.01626	0.01339	-0.01639	-0.01327	0.01764	0.01359	0.01455	0.01228	0.01675	-0.01269	-0.01571	0.01751	-0.01655	-0.01696	0.01664
	0.4577	0.15089	-0.05898	-0.04111	0.03855	0.03211	-0.03012	-0.02885	0.02251	0.02827	0.01945	0.01812	-0.01817	0.02048	-0.01631	-0.01397	-0.01677	-0.01389	-0.01772	0.01374	0.01489	0.01274	-0.01677	-0.0127	-0.01579	-0.01759	-0.01684	-0.01718	-0.01669
	0.45919	-0.15287	-0.06427	0.04165	0.03861	0.03221	-0.0321	-0.0292	0.02338	-0.02841	-0.02006	0.019	-0.01883	-0.02048	-0.01632	-0.01403	0.01703	-0.01395	-0.0179	0.01398	0.01547	0.01339	0.01731	0.01291	-0.01649	0.01768	-0.01738	-0.01778	-0.01717
	0.47064	0.15783	0.06535	-0.0421	0.03875	-0.03287	0.0331	0.0293	-0.02361	0.02875	-0.02086	0.01918	0.01885	0.02054	0.01644	0.01428	-0.01708	0.01422	-0.01804	0.01409	-0.01561	-0.01384	0.0174	-0.01295	-0.01676	-0.01785	0.01783	-0.01793	-0.01739
	0.47283	0.16169	-0.06614	-0.04334	0.03977	0.03288	0.03321	0.0294	-0.02395	-0.02951	0.02102	0.01937	0.01917	-0.02065	-0.01652	-0.01549	-0.01711	0.01437	-0.01836	-0.01456	0.01621	0.01394	0.01786	-0.01321	-0.01692	-0.01839	0.01788	0.01794	-0.01772
	0.47444	0.16184	0.06669	-0.04349	0.04028	-0.03343	0.0336	-0.03004	-0.02418	-0.02985	-0.0214	0.01941	-0.01918	-0.02136	-0.01704	0.01591	0.01726	-0.01468	0.01916	-0.01476	0.01643	-0.01424	-0.01828	0.01329	-0.01693	0.01868	0.01789	-0.01856	-0.01783
	0.47474	-0.16801	0.06795	0.04449	0.04207	0.03408	0.0346	0.03007	0.02454	-0.0299	0.02149	0.01947	0.0194	0.02144	-0.01709	-0.01601	-0.01731	-0.01508	0.01932	-0.01487	-0.01647	-0.01435	0.01885	0.01365	-0.01705	-0.01873	0.01822	0.01861	0.01832
	-0.47599	-0.17069	0.06995	-0.04456	0.04243	-0.03473	0.03462	0.03043	-0.0248	-0.03056	0.02234	-0.01975	0.01955	-0.02237	-0.01786	-0.01609	-0.01747	0.01511	-0.02	-0.01502	0.01707	-0.01442	0.0192	-0.01398	-0.01708	0.01919	-0.01953	0.01897	0.01893
	0.47815	0.17328	-0.07194	0.04461	0.0426	-0.03541	-0.03506	-0.0306	0.02549	0.03223	0.02239	0.02064	0.02086	0.02317	0.0181	-0.01621	-0.01849	-0.01521	0.02004	0.01554	-0.01719	0.01448	0.01934	0.01466	-0.01754	0.01956	-0.01976	0.01928	-0.01894
	0.48043	-0.17482	0.07319	-0.04596	-0.04436	-0.03719	-0.03604	-0.0322	0.02553	0.03241	0.02254	0.02113	0.02097	-0.02341	-0.01851	0.01673	0.01873	0.01552	-0.02016	0.0158	-0.01738	0.01459	0.01972	-0.0151	0.01785	-0.0196	-0.0209	-0.01994	0.01917
	0.48132	-0.18017	-0.0734	-0.04617	0.04446	-0.03726	0.03616	0.03245	-0.02567	0.03281	-0.02277	0.02157	-0.02133	0.02357	-0.01855	0.01702	0.01941	-0.01582	0.02017	0.01581	-0.01764	-0.01473	-0.01973	0.01523	0.01816	0.01998	-0.02113	0.02022	0.01926
	0.48458	0.18032	0.07468	0.04774	-0.04524	-0.03727	-0.03618	0.03272	0.02714	-0.03293	0.02281	0.02164	-0.0221	-0.02399	0.01895	0.01792	0.01976	-0.01583	-0.02024	0.0161	0.01826	-0.01475	0.01997	-0.01694	-0.0182	0.02044	0.02176	-0.02049	0.01937
	0.48515	0.18149	-0.0749	-0.0478	0.046	0.038	-0.03635	-0.03273	-0.0275	-0.03299	-0.02408	-0.02177	-0.02226	0.02414	0.01898	-0.01877	-0.01991	-0.01617	0.02031	-0.01679	-0.0191	0.0149	0.02005	0.01696	0.01844	-0.02057	0.02237	-0.0205	-0.01981
	0.48729	0.18379	-0.07507	-0.04841	0.04651	-0.03803	0.03653	-0.03285	0.02753	-0.0332	-0.02424	0.02197	-0.02236	-0.02436	0.0194	-0.01922	0.01997	-0.01658	-0.02077	0.01784	0.01919	0.01543	0.02045	0.01736	0.01859	-0.02074	-0.02245	0.02054	-0.01991
	0.48741	0.18643	-0.07557	0.04854	0.0467	0.03815	0.03655	-0.03355	-0.0276	0.03331	-0.02543	-0.02206	0.02312	0.02492	0.01973	-0.01977	-0.02013	-0.018	0.02103	-0.01785	-0.01963	0.01562	0.02047	-0.01742	-0.01918	-0.02096	-0.02249	0.02144	-0.0201
	0.49098	0.18843	-0.07852	-0.04867	0.04696	0.03846	0.03671	-0.03401	0.0279	0.03332	0.02547	-0.02237	-0.02355	0.02506	0.02001	-0.01977	0.02103	0.01839	-0.02121	-0.01803	-0.02003	0.01575	0.02079	-0.01772	-0.01926	0.02133	-0.02273	0.02151	-0.02019
	0.49417	-0.19107	-0.07932	0.04907	-0.04731	0.03866	0.03728	-0.03415	0.02819	0.03374	0.02556	0.02309	0.02368	0.02514	0.02031	-0.02061	0.02127	0.01845	-0.02134	0.01822	0.02016	-0.01601	-0.02104	0.01775	-0.02024	-0.02234	0.02275	0.02155	0.02092
	0.49451	-0.19107	-0.08195	0.04978	-0.04793	0.03938	0.03972	0.03433	0.0283	0.03464	0.02561	0.0235	-0.02534	-0.02525	-0.02052	0.02068	0.02134	0.01882	0.02135	-0.01855	0.02023	0.01606	0.02105	-0.01793	-0.02042	-0.0234	-0.02318	-0.02173	-0.02161
	0.49998	0.20011	0.08285	0.05006	0.04808	-0.0399	-0.04098	0.03444	0.02848	-0.03568	-0.02579	-0.02385	0.02577	0.02544	-0.02087	0.02083	0.02137	-0.01896	-0.02139	0.01866	0.02025	-0.01621	0.02108	-0.01811	0.02059	0.02363	-0.02347	0.02239	0.02164
	0.50552	0.2006	0.08401	-0.05011	0.04811	0.04028	-0.04121	0.03567	-0.02854	-0.03603	-0.02585	0.0242	-0.02586	0.02548	0.02132	0.02167	0.02183	0.01912	0.02174	-0.01871	0.02038	-0.01633	0.0211	0.01829	0.02081	0.02404	0.0238	0.02289	0.02183
	0.5062	0.20087	-0.08428	0.05162	0.04855	0.04067	0.04146	-0.03602	0.0295	-0.0365	0.02603	0.02438	-0.02678	-0.02611	-0.02172	-0.02194	0.02199	0.01967	0.02175	-0.01892	0.02068	-0.01697	0.02138	-0.01844	0.02086	0.02531	-0.02394	0.02322	0.02271
	0.51281	0.20108	0.0843	0.05229	0.05	-0.04145	-0.04214	0.03651	0.03039	0.03675	-0.02612	0.0252	0.02745	-0.02633	-0.02194	-0.02208	-0.02212	-0.01993	-0.02181	0.01912	-0.02073	-0.01709	0.02145	-0.01894	-0.02149	0.02591	-0.02412	0.02375	0.02292
	0.51553	0.20341	0.08496	0.05375	0.052	0.04186	0.0422	-0.03676	-0.03164	-0.0374	0.02665	-0.02558	-0.02786	0.0265	0.02222	0.02298	-0.02231	-0.02	-0.02293	-0.01914	0.02076	0.0171	-0.02145	0.01929	-0.02193	0.02595	0.02452	0.0238	0.02298
	0.51719	-0.20496	0.08624	0.05421	0.05425	-0.04208	-0.04325	0.03745	-0.03169	-0.03817	-0.02683	0.02627	0.02845	-0.02697	-0.02284	-0.02309	-0.02239	-0.02032	-0.02383	-0.01957	-0.02106	-0.01746	-0.02172	-0.01968	-0.02321	-0.02611	-0.025	-0.02392	0.02306
	0.51768	-0.20496	0.0864	0.05572	0.05454	-0.04232	0.04433	0.03832	-0.03253	0.03951	-0.02701	0.02679	0.02851	-0.02727	-0.02345	0.02378	-0.0224	0.02067	-0.02439	0.02036	-0.02166	0.01793	0.02181	-0.01984	-0.02325	-0.0266	0.02515	-0.02397	0.02319
	0.51881	-0.20726	-0.08707	-0.05684	0.05471	-0.04251	0.04447	0.03856	0.03275	-0.03954	0.02767	0.02682	0.02879	-0.02747	0.02359	-0.02384	0.02254	-0.0207	0.02472	-0.02065	-0.0217	-0.01887	0.02265	0.02024	0.02354	-0.02683	0.02536	-0.02403	-0.0236
	0.52057	-0.20814	-0.08825	-0.05685	-0.05503	0.04292	-0.04462	-0.0391	0.03284	-0.03977	-0.02774	-0.02689	-0.02902	-0.0284	0.02369	0.02414	-0.02295	-0.02075	-0.02499	0.02113	0.02195	0.01895	0.02301	0.02049	-0.02356	0.02699	-0.02536	-0.02416	-0.02395
	-0.52133	0.21641	0.09002	-0.05878	-0.05521	0.04328	0.04486	-0.03941	0.03313	0.04022	0.02779	0.02745	-0.0293	0.02861	0.02418	-0.02424	-0.02322	0.02089	-0.02536	-0.02118	0.02199	-0.01927	-0.02301	0.02057	0.02411	-0.0278	-0.0255	-0.02434	0.0244
	0.52159	0.21731	0.09164	0.06118	0.05653	-0.04408	0.04553	-0.03954	0.03336	0.04077	-0.02779	0.02762	0.0296	0.02903	0.02495	0.02462	0.02339	0.02136	0.02589	-0.02168	-0.02209	0.01941	-0.02321	0.02092	-0.02443	0.02788	-0.02573	0.02472	-0.025
	0.53025	0.22124	0.09164	0.06155	-0.05861	0.04479	0.04558	-0.03971	0.03374	0.0412	-0.02786	-0.02764	-0.02986	-0.02991	0.02592	-0.02467	0.02374	0.02156	-0.02659	-0.02175	0.02238	0.01966	0.02347	-0.02136	-0.02451	0.02791	-0.02594	0.0248	-0.02504
	0.53796	0.22252	0.09463	-0.06408	-0.05864	-0.04545	0.04643	-0.03972	0.0343	-0.0418	0.02799	0.02774	0.02992	0.03131	-0.02638	0.02495	-0.02416	-0.02193	0.02691	0.02217	-0.02282	-0.02046	-0.02394	0.02141	-0.0248	-0.02808	-0.026	-0.02505	-0.02516
	0.53874	-0.2234	0.09539	-0.06443	0.05997	-0.04593	-0.04706	0.04038	0.03518	-0.04241	-0.02813	0.02789	-0.03042	0.03139	0.02647	0.02503	0.02454	-0.02322	-0.027	0.02246	0.0229	0.02065	-0.02411	-0.02204	-0.02492	-0.02822	0.02604	-0.02542	0.02531
	0.54468	-0.22546	0.10211	0.06448	0.06001	0.04616	-0.04713	-0.04039	0.03533	0.04246	-0.02816	0.0282	-0.03055	0.03165	0.02649	0.02504	0.02477	0.02343	0.0271	0.0225	0.02309	0.02077	-0.02417	0.02248	0.02496	-0.02857	0.02618	-0.02553	0.02543
	0.54697	-0.22605	0.10215	-0.06692	-0.06029	-0.04672	-0.04715	-0.04041	0.03632	-0.04292	-0.02834	-0.02976	0.03069	-0.03181	0.02658	-0.02522	-0.02481	-0.02356	0.02752	-0.02276	-0.02365	0.02084	0.02445	0.02273	-0.02508	-0.02881	0.02642	0.02582	-0.02587
	0.54705	0.22614	0.10254	0.06754	0.06089	-0.0468	-0.04732	-0.04127	-0.03637	0.04307	0.02859	0.02977	0.03125	0.03228	0.02661	0.02525	-0.02505	-0.0237	-0.02755	-0.02413	-0.0238	-0.02109	-0.02455	0.02281	-0.0256	-0.02905	-0.02655	-0.02587	0.02602
	0.55216	0.22676	0.10388	0.06796	0.06243	0.04715	0.04741	-0.0414	0.03646	0.04337	-0.02883	-0.02979	0.03151	-0.03243	-0.02664	0.02534	-0.02537	0.02385	-0.02793	0.02431	-0.02383	0.02119	-0.02461	-0.02282	0.02561	0.02928	-0.02676	-0.02591	-0.02616
	0.56364	0.22983	-0.1064	0.06799	0.06255	-0.04754	0.04807	-0.04202	0.03659	0.04353	0.029	-0.02981	-0.03159	-0.03257	0.02676	0.02552	0.02569	-0.02391	-0.02813	-0.0244	-0.02408	-0.02145	-0.02471	0.024	-0.02624	0.02953	-0.02753	0.02602	-0.02652
	0.56934	0.23007	-0.10982	-0.06804	-0.06357	-0.04765	-0.04811	-0.0421	-0.03759	0.04493	0.0294	0.03004	0.03276	0.03267	0.0273	0.02615	0.02744	-0.02394	-0.02834	-0.02499	-0.02421	-0.02151	-0.02485	0.02428	-0.02633	-0.02967	0.02783	-0.02604	0.02691
	0.56956	0.23327	-0.11078	-0.06817	0.06389	0.04767	0.0486	-0.0427	0.03772	-0.04495	-0.02954	-0.03013	0.03361	-0.03282	-0.02792	0.02637	-0.02756	-0.0242	-0.02848	-0.02548	-0.02461	0.02156	0.02507	0.02437	0.02678	-0.02975	0.0284	-0.02636	0.02701
	0.56999	0.2352	0.11413	-0.06828	-0.06397	0.04793	0.04876	0.0434	0.03839	0.04524	-0.02999	0.03104	0.03369	0.03283	0.02812	-0.02651	-0.02791	0.02458	-0.02874	-0.02553	-0.02461	0.02172	-0.02524	0.02466	0.02717	0.0299	0.02869	-0.02641	-0.02714
	0.57265	-0.23765	0.11484	-0.06844	0.06515	-0.04812	-0.04928	-0.04381	0.03892	-0.04541	-0.03048	0.03112	0.03398	-0.03309	-0.02814	-0.02681	0.02796	-0.02468	0.02911	0.02555	-0.02525	0.02181	-0.02537	-0.02562	0.02772	-0.03093	0.02916	0.02673	0.02757
	0.57676	0.23789	0.12109	0.06975	0.06524	0.04868	-0.04928	0.04483	-0.03893	0.04587	-0.03049	-0.03185	0.03398	-0.03376	0.02822	-0.02754	-0.0281	-0.02479	0.02923	-0.02586	0.02532	-0.02266	-0.02601	0.02587	0.02829	-0.03114	-0.02942	0.02675	-0.02789
	0.58018	0.23826	-0.12121	0.06999	-0.06655	-0.05076	0.04965	-0.04489	0.03997	-0.04608	0.031	0.03209	0.03424	-0.03594	-0.02825	0.02761	-0.0281	-0.02488	0.02931	0.02598	-0.0272	0.02324	0.02603	0.0261	0.02864	0.03127	0.0295	0.02724	-0.02806
	0.5823	0.23989	-0.12202	-0.07055	0.06691	-0.05123	0.051	-0.04507	-0.03998	-0.04677	-0.03147	0.03227	0.03439	-0.03608	0.02839	-0.02788	0.02851	0.02564	-0.02935	0.02607	-0.0276	0.02387	-0.02645	0.02691	-0.02878	-0.03169	0.02959	-0.02744	-0.02815
	0.58274	0.24031	0.12354	0.07063	0.06732	0.05153	0.05144	-0.04534	0.0401	0.04682	-0.0317	-0.03275	0.03444	0.03653	0.0286	0.02811	0.02852	0.02573	0.02965	-0.0265	-0.02772	0.02402	-0.02668	-0.02693	0.02918	-0.03214	0.0297	-0.02757	-0.02861
	0.5867	0.24456	0.12392	0.07395	-0.06801	-0.05162	0.05443	-0.04582	-0.0403	0.04778	-0.03199	0.03279	0.03466	-0.03689	-0.02905	0.02868	0.02878	-0.02591	0.02982	0.02662	0.02774	0.02414	-0.02679	0.02754	0.02922	-0.03226	0.03	-0.02767	0.02884
	0.58959	-0.24459	0.12543	0.07407	-0.06837	-0.05208	-0.0545	0.04668	0.04053	-0.04801	0.03296	-0.0331	-0.03472	0.03713	0.02987	0.02876	-0.02925	0.02606	0.02983	-0.0268	0.0297	0.02422	0.02682	0.02787	0.02939	-0.03231	-0.0301	0.02774	0.02884
	0.59346	0.2473	0.13128	0.07496	0.06854	-0.0529	-0.05572	-0.04675	-0.04089	0.04838	0.03307	0.03512	0.03483	-0.03759	-0.03009	-0.02898	0.02946	0.02609	0.02996	0.02701	0.02988	0.02442	0.02683	0.0282	-0.02976	0.03256	0.03033	-0.02815	0.02889
	0.59487	0.25409	0.13257	-0.07803	-0.06907	-0.05295	-0.05674	-0.04679	0.04113	-0.04859	0.03309	-0.0359	0.03495	0.03784	0.03056	0.02947	-0.02997	0.02631	-0.0301	0.02726	0.02991	-0.02509	0.02701	-0.02826	0.03004	0.03284	0.0308	-0.02829	-0.03029
	0.60173	0.25635	0.13258	0.07871	0.06912	0.05589	0.05678	0.04713	0.04188	0.04895	-0.03345	0.03613	0.03504	0.03787	-0.03068	-0.02968	-0.03033	-0.02641	-0.03033	0.02766	-0.03001	0.02515	0.02707	0.02828	-0.03007	0.03296	-0.0308	0.02834	0.03116
	0.60278	0.25772	0.13447	-0.08023	0.06949	-0.05635	0.05704	-0.04755	0.0425	0.04909	0.03372	-0.03696	-0.03522	-0.038	-0.0315	-0.02969	0.03034	-0.02675	-0.03039	0.02826	-0.03035	-0.02515	-0.02711	-0.02877	-0.03026	0.03297	-0.0318	0.02835	0.0312
	0.60369	0.26145	0.14054	0.08028	0.07106	0.05706	0.05733	0.04772	0.04254	0.04922	-0.03373	-0.03743	0.03546	0.03814	0.03175	0.02976	-0.03085	-0.02691	0.03066	0.02842	-0.03086	-0.02556	-0.02802	0.02924	0.03076	-0.03306	0.03196	0.02926	0.03178
	0.60672	0.26152	-0.14167	-0.08089	0.07168	-0.05814	0.05798	-0.04788	0.04282	0.0496	-0.03454	0.0377	0.03588	0.03832	0.03204	-0.02993	-0.03093	0.02716	-0.0313	0.02871	0.03124	0.02591	0.02899	0.02929	-0.03104	-0.03311	0.032	-0.02956	0.03208
	0.60766	0.26185	0.14213	-0.0809	-0.07305	-0.05832	0.05848	-0.04817	0.04295	-0.04966	0.03467	-0.03808	-0.03593	-0.03875	-0.03209	-0.03013	-0.03111	-0.02716	0.03142	-0.0288	-0.03178	-0.02616	0.0292	0.02947	-0.03118	-0.03404	0.03202	-0.03004	-0.03263
	0.61364	0.26359	0.14309	0.08104	-0.07425	-0.05901	-0.05857	0.04839	-0.04313	0.05046	0.0349	0.03836	0.03661	0.0388	0.03235	-0.0302	-0.03123	0.02751	-0.03177	0.02887	0.03184	0.02635	-0.02921	0.02957	-0.03242	-0.03409	-0.03233	-0.03018	-0.03267
	0.62097	0.26541	-0.14484	-0.08136	0.07458	0.0595	0.05907	0.0484	0.04393	-0.05047	-0.03542	-0.03895	0.03711	-0.03882	-0.0327	0.03032	-0.03146	0.0278	-0.03211	-0.0293	0.0323	0.02638	-0.02922	0.02961	-0.0326	-0.03453	0.03267	-0.03109	0.03377
	0.62479	-0.26825	0.14757	0.08139	-0.07487	0.06029	0.05965	-0.04881	0.04413	0.05246	-0.03565	0.03923	0.03747	0.03978	-0.03328	0.03066	0.03175	-0.02807	0.03215	0.03066	0.0326	0.02653	-0.02966	-0.03055	0.03302	0.03494	-0.03269	0.03149	0.03389
	0.62524	0.269	0.14875	0.08285	-0.07578	0.06103	-0.06013	0.04954	-0.04455	-0.0526	0.03568	-0.03946	0.03765	0.0399	0.03388	0.03072	0.03316	0.02808	-0.03257	-0.03101	-0.03306	-0.02659	-0.0297	0.03064	0.03324	0.03513	-0.03286	-0.03156	-0.03405
	0.62574	-0.26941	0.14895	-0.08375	0.07679	0.0653	0.0602	0.04963	-0.04601	-0.05339	-0.0362	-0.04014	0.03817	-0.04069	0.03389	0.03093	-0.03316	-0.02865	0.03259	-0.03114	0.03319	-0.02681	-0.03013	-0.03065	0.03345	-0.03558	0.03406	-0.03173	0.03406
	0.62606	-0.26979	0.15172	0.0842	-0.07745	-0.06557	-0.06048	-0.04966	0.04605	0.05393	-0.03732	-0.04019	0.03839	-0.04073	0.03453	-0.03102	0.03409	0.02867	0.03269	-0.0321	-0.03323	0.02706	0.03016	0.03071	0.03348	-0.03579	0.03409	-0.03263	0.03439
	0.62755	-0.27434	0.15209	0.08512	0.07856	0.06599	-0.06068	0.05007	0.04641	-0.05476	0.03773	0.04034	-0.03839	-0.04139	-0.03538	0.03111	-0.03419	-0.02885	-0.03293	-0.03257	-0.03362	-0.02722	0.03047	0.03146	0.03419	-0.03586	0.03412	0.03283	0.03443
	0.62908	0.27914	0.15243	0.0853	-0.07909	-0.06646	-0.06086	0.05042	0.04651	0.05497	0.03778	-0.04083	0.03851	0.04162	-0.03579	0.03112	0.03437	-0.02892	0.03324	0.0326	-0.03384	-0.0284	-0.03047	0.03148	0.03421	0.03599	-0.03431	-0.03285	-0.03525
	0.63083	0.2793	0.15418	0.08564	-0.07964	-0.06705	-0.06101	-0.05055	0.04668	-0.05502	0.03791	-0.04192	-0.03921	0.04189	-0.03631	0.0316	-0.03481	-0.02894	0.03332	0.03296	0.03416	0.02845	0.03132	-0.03217	0.03443	0.03618	-0.0358	-0.03294	0.03528
	0.63264	-0.2796	0.15444	-0.08597	0.08093	-0.0675	0.06146	-0.05108	0.04749	-0.05546	0.03822	0.0424	0.03927	0.04199	-0.03642	-0.03167	0.03588	0.02931	0.03374	-0.03339	-0.03431	-0.02876	-0.03149	-0.03313	0.035	0.03717	-0.03592	-0.03297	0.03552
	0.63442	0.28299	-0.15594	0.08725	-0.08121	-0.06905	-0.06216	0.05312	-0.04819	-0.05568	-0.03834	0.04265	-0.03947	-0.04213	0.03653	-0.03177	-0.03601	-0.03028	0.03381	-0.03367	0.03434	0.02902	-0.03233	0.03376	-0.03513	0.03718	-0.03608	-0.03311	-0.03557
	0.64407	0.28337	-0.15894	-0.08923	0.0819	0.06959	-0.06328	-0.05338	0.04861	0.05581	-0.03838	0.04268	0.04	0.04226	-0.03655	-0.0321	0.03612	-0.03119	0.03444	0.03368	0.03481	-0.0291	-0.03252	-0.03387	-0.03546	-0.03792	0.03619	-0.03348	-0.03559
	0.64637	0.28356	-0.15948	0.09097	-0.08211	-0.07067	0.06403	-0.05348	-0.04893	0.05587	-0.03842	-0.04268	0.041	0.04272	-0.03676	-0.03241	0.03621	-0.03139	0.03513	-0.03374	-0.03482	-0.0291	-0.03254	0.03401	-0.03598	-0.03842	-0.0367	0.03354	-0.03615
	0.65696	-0.28482	-0.16243	0.09158	-0.08258	0.07079	0.0647	-0.05503	0.04934	-0.0561	0.03905	0.04274	-0.04149	-0.04313	-0.03704	-0.03285	-0.03717	0.03184	0.03544	-0.03383	0.03517	0.02912	-0.03299	-0.03426	-0.03649	0.03882	-0.03688	-0.03364	-0.03641
	0.65791	0.28703	-0.16301	-0.0918	-0.08402	0.07105	0.06486	0.05506	0.04968	-0.05737	-0.03953	-0.04286	-0.04159	-0.04351	0.03727	-0.03285	0.0375	0.03188	0.03556	-0.03406	0.03552	0.02934	0.03362	0.03459	-0.03734	-0.03929	0.03738	-0.03376	-0.03676
	0.65833	0.28704	0.16314	-0.09449	-0.08526	0.0711	-0.066	-0.05528	-0.05039	-0.05846	0.03999	0.04388	-0.0419	-0.04377	0.03806	-0.03336	0.03764	-0.03265	0.03574	0.03461	-0.03554	0.02944	-0.03364	-0.03465	-0.03739	0.04089	0.03757	0.03388	-0.03736
	0.65848	0.28751	0.16332	0.09483	0.08583	-0.07119	0.06604	-0.05561	0.05077	0.05853	-0.0408	0.04391	0.04286	0.04428	-0.03845	0.03374	-0.03789	0.03277	-0.03622	-0.03505	0.03556	-0.03055	-0.03386	0.03497	0.03758	0.04096	-0.03857	-0.0339	0.03761
	0.66075	0.28836	0.16396	0.09557	0.08611	0.07161	-0.06656	-0.05626	0.05081	-0.05888	-0.04084	0.04405	0.04363	-0.04431	0.03861	0.03408	-0.03802	-0.03316	-0.03689	0.03571	-0.03577	-0.03103	0.03402	0.03527	-0.03865	0.04096	-0.03886	-0.03398	0.03777
	0.66143	0.28876	0.1643	-0.09686	0.08614	-0.07281	-0.06658	0.05702	0.05085	0.05948	-0.0413	-0.04411	-0.04376	-0.04481	-0.03888	-0.03491	-0.03854	0.03338	0.03729	-0.03594	-0.03587	-0.03106	-0.03449	0.03549	-0.03922	0.04103	-0.03922	0.03429	-0.03835
	0.66463	0.29062	-0.16679	0.09727	-0.08625	-0.0734	0.06666	0.05718	0.05156	0.06137	-0.04201	-0.04425	0.04402	0.04483	0.0389	-0.03532	0.03878	0.0334	-0.03776	-0.03653	0.03594	0.03184	0.03481	0.0362	0.0403	-0.04189	0.04056	0.0344	0.03852
	0.66706	0.29339	0.16693	-0.09764	0.087	0.0736	0.06666	0.05752	0.05206	-0.06285	0.04232	0.04445	0.04451	-0.04507	0.03972	-0.03549	0.03957	0.03354	-0.03893	-0.03691	0.03622	-0.03195	-0.03491	-0.03729	0.04047	-0.04198	0.04063	0.03456	0.03862
	0.66967	0.29474	0.16816	0.09798	0.08721	0.07371	-0.06693	-0.05794	-0.05413	0.06293	0.04259	-0.04496	-0.04538	-0.04531	0.04021	-0.0355	-0.03982	-0.03411	0.03906	0.03703	0.03622	0.03242	-0.03492	0.03776	0.0405	0.04211	-0.04089	0.03472	-0.03874
	0.67203	0.2951	-0.16816	-0.09812	0.0874	-0.07377	0.06694	-0.05847	-0.05442	0.06389	0.04327	0.04501	0.04552	-0.04602	0.04026	-0.03555	0.03994	-0.03429	-0.03911	0.03791	0.03638	0.03247	0.03494	0.03785	-0.04072	-0.0427	-0.0413	-0.03518	0.03893
	0.67461	-0.29795	0.17027	0.0989	0.0894	-0.074	-0.06703	0.05868	0.05462	-0.06443	0.04344	0.04511	-0.04593	0.04617	0.04036	0.03597	-0.04003	0.0351	0.04014	-0.03801	-0.03656	-0.03283	0.03515	-0.0379	-0.04107	-0.04288	0.04222	0.03535	0.03919
	0.68328	0.30794	-0.17042	0.09926	0.09006	0.07435	0.06719	-0.05894	0.05483	-0.06446	-0.04351	-0.04547	0.04602	0.04646	0.04048	-0.036	-0.04056	0.03614	0.04049	-0.03825	-0.03663	-0.03325	0.0355	0.03825	-0.04113	0.04342	-0.04231	-0.03543	0.03938
	0.68478	0.31182	-0.17514	0.10035	-0.09092	-0.0749	0.06728	-0.05905	0.05526	-0.06473	0.04494	-0.04548	-0.04682	0.04664	-0.04099	-0.03632	-0.04059	0.03647	-0.04102	0.03858	0.03675	0.03337	-0.03558	0.03852	-0.04124	-0.0435	-0.0425	-0.03591	0.03965
	0.68508	0.31192	0.17532	0.10038	0.09107	0.07593	0.06747	0.0591	0.0554	-0.06485	-0.04533	-0.04623	-0.04716	-0.04694	0.04311	0.03646	-0.04078	0.03682	-0.04152	0.03864	0.03708	-0.03347	0.03561	0.0386	-0.04196	-0.04393	0.04289	0.03616	-0.03979
	0.68524	0.31222	0.18141	0.1016	-0.09159	-0.07627	0.06756	0.06036	0.05553	0.06486	-0.04541	-0.04636	0.04723	-0.04697	0.04326	0.03655	0.04131	-0.03746	-0.04154	0.03889	-0.0371	0.03377	0.03568	0.03887	0.04213	-0.04393	-0.04306	-0.0362	-0.03987
	0.68529	-0.31442	0.1816	0.10178	0.09298	0.07754	0.06776	0.061	-0.0565	-0.06486	-0.04546	-0.047	0.04756	0.04782	-0.044	0.03656	-0.04133	0.03793	0.0417	-0.03953	0.03723	-0.03487	0.0357	0.03887	-0.04219	0.04437	0.04312	0.03751	0.03996
	0.6907	0.31467	-0.18248	-0.10187	0.09321	0.07847	0.07082	0.06108	0.05665	0.06513	0.04584	-0.04782	-0.04808	-0.04783	0.04447	-0.03778	-0.04138	0.03878	0.04205	-0.0396	0.03724	-0.03489	-0.03597	-0.03953	0.0422	0.04476	0.04314	-0.0383	-0.04076
	0.6921	0.31574	0.18277	-0.10223	0.09329	0.07876	-0.07145	-0.06133	0.05693	0.06559	0.04599	-0.04789	-0.04816	0.04785	0.0446	0.03824	-0.0417	-0.03952	-0.04207	-0.03972	0.03796	0.03517	0.03612	-0.04011	-0.04235	-0.04492	0.04326	-0.03937	-0.04146
	0.69342	0.31804	0.18297	0.10274	-0.09343	-0.07905	-0.07151	0.06166	0.05706	-0.066	-0.04606	0.04806	-0.04817	0.04797	0.04485	0.0384	0.04225	-0.03952	0.04219	-0.03973	0.03889	0.0358	-0.03625	0.04058	-0.04243	-0.0453	-0.04385	0.03951	0.0416
	0.69431	-0.31981	-0.18414	0.10291	0.0935	-0.07974	-0.0716	0.06242	-0.05713	-0.06704	0.04643	0.04861	-0.04838	0.0483	0.04496	-0.03841	-0.04237	-0.03968	-0.04222	-0.04036	0.03892	-0.03655	-0.0364	-0.04069	0.04258	-0.04549	0.04407	-0.04037	-0.04175
	0.6957	0.32218	0.18529	0.10294	0.09413	-0.08071	-0.07171	0.06341	-0.05731	0.06707	0.04658	0.04863	0.04843	-0.04833	-0.04506	0.03865	0.04287	-0.04104	-0.04251	0.04044	-0.03938	-0.03675	-0.03641	0.04095	0.04301	0.04584	-0.0443	0.04038	0.04186
	0.69721	0.32355	0.18551	0.10346	0.09508	-0.08091	0.07295	-0.06346	-0.05758	-0.06741	-0.04708	0.04872	-0.04899	-0.04896	0.04528	0.03888	0.0429	0.0417	0.04278	0.04115	-0.03974	-0.03685	-0.03677	-0.04117	0.04316	0.04619	-0.04456	0.04073	-0.04201
	0.70281	-0.32618	0.18579	0.10364	-0.09518	0.08094	0.07297	0.06403	0.05846	0.06793	-0.04736	0.04881	0.04909	-0.04938	0.04575	-0.03892	0.04306	-0.04186	-0.04282	0.04134	-0.04026	0.03707	0.03698	0.04119	0.04376	-0.04705	-0.04464	0.04091	0.04204
	0.70882	-0.32618	0.187	0.10417	0.097	0.08153	-0.07407	0.06434	-0.05873	0.0681	0.04742	-0.04891	0.04991	-0.0494	0.04587	-0.03905	0.04346	-0.04222	0.04335	0.04138	-0.04035	-0.03709	0.03701	-0.04122	-0.04393	0.04706	0.04478	-0.04097	0.04223
	0.71081	0.3267	0.18845	0.10602	0.09759	-0.08177	0.07449	0.0646	0.05911	0.06819	-0.0475	-0.04918	0.04996	-0.04951	-0.04649	-0.03944	-0.04465	-0.04238	0.04343	-0.04209	0.0407	-0.03758	0.03734	-0.04128	0.04415	0.04721	0.04481	0.04105	0.04226
	0.71832	0.32679	0.1915	0.10622	0.09786	0.08212	0.0746	0.06462	0.05918	0.06865	0.04942	0.04943	0.05101	0.05008	-0.04721	-0.03975	-0.04469	-0.04385	-0.04364	-0.04266	0.04097	0.03764	-0.03748	-0.04133	0.04461	0.04723	-0.04481	-0.04114	-0.04268
	0.72131	0.32718	0.19176	-0.10635	0.09817	0.08239	0.0757	-0.06473	0.05983	-0.06929	-0.04985	0.04957	-0.05136	-0.05041	0.04726	-0.03983	-0.04481	-0.04402	-0.04367	-0.04277	-0.04117	0.03812	-0.03769	-0.04146	0.04483	0.04728	-0.04488	0.04131	-0.04308
	0.72197	0.32741	-0.19349	0.10914	-0.09852	-0.08263	-0.07574	-0.06473	0.05986	-0.06953	0.05155	-0.04966	-0.05197	0.05078	0.04744	-0.03989	0.04483	0.04405	0.04413	-0.04293	0.0414	0.0385	-0.03885	-0.04147	-0.04528	-0.04756	-0.04505	-0.04155	0.04318
	0.72345	-0.32777	-0.19358	-0.11	0.10208	0.0827	-0.07664	0.06556	-0.06029	0.06958	0.05193	-0.05029	-0.05204	-0.05103	0.04772	0.03996	-0.04494	-0.04469	0.04435	0.04343	0.04142	0.03862	0.03938	-0.04254	0.04546	-0.04766	0.04526	-0.04155	0.04421
	0.72861	0.32942	0.19447	0.11053	-0.10211	0.08353	0.07758	0.06598	-0.06124	-0.06989	0.0521	0.05151	-0.05218	0.05104	-0.04781	0.04043	0.04524	0.04505	0.04437	0.04344	-0.04146	0.03901	-0.03984	-0.04264	0.04556	-0.04789	-0.04567	0.04172	-0.04445
	0.7301	-0.33383	0.19518	-0.11126	0.10244	0.08367	-0.08027	0.06606	0.06181	0.07185	0.05245	-0.0518	-0.05283	-0.05112	0.04784	0.04051	-0.0453	0.04506	0.0447	0.04382	0.04158	0.03963	-0.03985	-0.04268	0.04581	-0.04794	-0.04593	-0.04197	-0.0448
	0.73151	0.3346	0.19679	0.11128	-0.10287	0.0843	0.08053	-0.06611	0.06182	-0.07215	0.05248	-0.05207	0.0534	-0.05146	0.0486	-0.04061	-0.04544	-0.04534	-0.04475	-0.04428	0.04188	-0.03979	0.03989	0.04325	-0.04667	0.04798	0.04614	0.04249	-0.04575
	0.73564	0.33649	-0.19773	-0.1116	-0.10375	-0.08477	0.0807	-0.06651	-0.06225	0.07272	0.05325	0.05219	-0.05383	-0.0519	-0.04862	-0.04098	0.04548	0.04539	0.04516	0.04451	0.04194	0.04027	-0.04045	-0.04351	-0.04827	0.048	-0.04693	0.04317	-0.04577
	0.73796	-0.34269	-0.19917	0.11241	0.10473	0.08765	-0.08175	0.06868	0.06294	-0.07301	-0.0534	0.05249	-0.05435	0.05193	0.04881	-0.04128	-0.04649	-0.04552	-0.0452	0.04505	0.04212	-0.04045	-0.04046	-0.04383	-0.04835	-0.04802	-0.04772	0.04357	0.04628
	0.74101	0.34327	-0.1992	0.11351	0.10535	0.0887	0.08218	0.06869	-0.06319	0.07322	-0.05341	0.05344	-0.0547	0.0525	0.04884	0.04133	0.04669	-0.04552	0.04537	0.04519	0.0424	-0.04068	-0.04124	-0.04393	-0.04857	-0.04894	0.04786	-0.0437	0.04682
	0.74306	-0.34463	0.19974	-0.11364	0.10663	0.08894	-0.08237	0.06931	-0.06329	0.07325	0.05358	0.05363	0.05489	0.0527	0.04902	-0.04165	0.04691	-0.04554	-0.0457	0.0453	0.04293	0.04084	-0.04166	-0.04412	-0.04881	-0.04933	-0.04814	0.04372	-0.04699
	0.74646	0.34488	0.20091	0.11618	0.10701	0.08916	-0.08275	0.06959	-0.06358	-0.07355	-0.05407	-0.05429	0.05506	-0.05273	0.04909	0.04178	-0.047	0.04605	-0.04573	0.04569	-0.04353	0.04085	0.04189	-0.04412	0.04903	-0.05001	0.0483	0.04376	0.04723
	0.74792	0.34683	0.20238	0.11688	-0.10723	-0.08943	0.08279	0.06977	0.06424	-0.07473	-0.05448	-0.05584	0.05579	0.05274	0.04951	0.04181	-0.04747	-0.04676	0.04599	0.04608	0.04354	0.0413	0.04242	-0.0445	-0.04929	0.0501	0.04856	-0.04389	0.04732
	0.74826	0.34684	0.20421	0.11905	0.10754	-0.08997	-0.08368	-0.07031	-0.06424	0.0756	-0.05458	0.05596	0.05589	0.05284	-0.0496	0.04193	-0.04758	0.047	0.04677	-0.04628	0.04388	-0.04167	0.04293	0.04477	0.05053	-0.05014	0.04862	-0.04468	-0.04735
	0.75208	0.34807	-0.20473	-0.12034	0.10783	0.08998	-0.08376	-0.07034	-0.06424	0.07561	0.05513	0.05617	-0.05624	-0.05286	-0.04974	0.04201	0.04759	-0.04731	-0.04716	-0.0466	-0.04397	-0.04205	-0.04404	-0.04489	-0.05086	-0.05047	0.04911	-0.0447	-0.04813
	0.7523	0.34807	0.20652	0.12051	0.11015	0.0902	0.08588	-0.07083	0.06474	0.07603	-0.05584	0.05661	-0.0564	0.0533	0.0499	-0.04225	0.04806	-0.04742	-0.04787	-0.04748	0.04418	-0.04252	0.04424	-0.04519	0.05121	0.05104	-0.04917	0.04482	-0.04827
	0.75396	-0.35127	-0.20721	0.12082	-0.11049	-0.09049	0.08593	0.0712	-0.06476	0.07646	0.05607	0.0567	0.05644	-0.05333	0.05016	-0.04288	-0.04807	-0.04835	-0.04803	-0.04768	0.04441	0.04282	0.04429	-0.04532	-0.05123	-0.05151	-0.04919	0.04491	-0.04843
	0.75478	0.35264	0.20745	0.12214	0.11051	-0.09276	0.08595	0.07128	-0.06595	0.07662	-0.05633	-0.05869	-0.05645	-0.0535	0.0502	0.04291	-0.0481	0.04867	0.04866	0.04814	0.04443	0.04304	-0.0443	0.04535	0.05124	-0.05152	-0.04933	-0.04553	0.04865
	0.75654	0.35542	0.20846	-0.12232	0.11147	-0.09476	0.08745	0.07198	0.06641	0.07665	0.05746	0.05871	-0.05656	-0.05357	-0.05064	0.04306	0.04833	0.04869	-0.04877	-0.04822	-0.04459	0.04351	-0.04495	0.04536	0.05137	-0.05166	0.04963	0.04555	0.04933
	0.76166	-0.35851	-0.20848	-0.12234	0.11157	-0.09512	0.08752	0.07229	-0.06721	-0.07672	-0.05784	-0.05897	0.05791	-0.05361	-0.05082	-0.04452	0.04873	-0.04871	0.04906	0.04825	0.04477	-0.04357	0.04507	0.04538	0.05167	0.05198	0.04973	0.04565	-0.04937
	0.76227	0.35933	0.21133	0.12261	0.11264	0.09515	-0.08757	0.07242	-0.06761	0.07674	-0.05841	-0.05909	0.05827	0.05409	-0.05123	-0.04481	-0.04878	0.04936	0.04907	-0.04913	-0.04512	0.04377	-0.0451	0.04548	0.05167	0.05215	0.04984	-0.04575	0.04991
	0.76737	0.36024	0.21389	-0.12372	0.11409	-0.0957	-0.08792	-0.07246	0.06804	-0.07739	-0.05856	0.05967	0.05892	0.05459	0.05136	0.04487	0.04948	-0.04942	0.04933	-0.04915	0.04522	0.04381	-0.04556	0.0456	0.05175	-0.05275	0.0499	0.04581	0.05036
	0.76776	0.36024	0.21531	-0.12445	-0.11441	-0.09597	-0.08923	0.07307	-0.06865	-0.07784	-0.05931	-0.06013	-0.05914	-0.05551	0.05169	-0.04511	-0.04951	0.04946	-0.04951	-0.04918	0.04564	0.04435	0.04607	0.04585	0.05213	-0.05295	-0.0499	-0.04622	-0.0506
	0.7681	0.36278	0.21567	-0.1258	0.11528	-0.09631	-0.08944	0.07328	0.06894	0.07817	-0.05971	0.06077	-0.05947	-0.05616	0.05226	-0.04583	-0.0499	-0.04979	-0.04964	-0.04952	0.04603	0.0451	0.04631	0.04643	0.05299	-0.05369	-0.05043	0.04642	0.05092
	0.76859	0.36618	0.21631	0.12609	0.1178	0.09676	0.09006	0.07336	-0.06902	0.07826	0.06044	-0.06123	-0.05956	0.05637	-0.05234	0.04623	0.05053	-0.05021	0.05116	-0.04953	-0.04653	0.0452	-0.04645	-0.04654	-0.05322	-0.05428	0.05061	0.04679	0.05093
	0.76892	0.36681	-0.22301	0.12697	0.11788	0.09766	0.0901	-0.0734	0.06903	0.0786	-0.06086	0.06128	0.0596	0.05646	0.05255	-0.04632	-0.05055	-0.05097	-0.05162	-0.05025	-0.04663	0.04524	0.04698	0.04718	-0.05351	0.05502	0.05066	-0.04699	-0.05096
	0.77079	0.3683	0.22416	0.12706	0.1193	0.0987	0.09028	-0.07456	-0.06903	0.07882	-0.061	0.0615	-0.05985	0.05654	0.05331	0.04639	-0.05058	-0.051	-0.05172	-0.05029	-0.04686	0.04546	-0.04748	0.04723	-0.05388	0.0552	-0.05069	-0.04728	-0.05149
	0.7712	-0.36981	-0.2259	0.12719	-0.11945	-0.10116	-0.09063	0.07475	-0.06994	0.07887	-0.06128	-0.06164	0.06064	-0.05661	0.05372	0.0466	0.05071	0.05122	-0.05204	0.05038	0.04766	-0.04553	0.04802	0.04725	-0.05392	0.05587	-0.05133	0.04775	-0.05152
	0.77191	0.37165	0.22635	0.12743	-0.12001	-0.10126	-0.09114	0.07546	-0.07013	-0.07887	-0.06197	-0.06183	-0.06064	-0.05827	0.05432	0.04676	-0.05098	-0.05182	-0.05215	-0.05108	-0.04776	-0.04651	0.04828	-0.04736	0.05399	0.05618	0.05134	0.04861	-0.0516
	0.77342	0.37259	0.22691	0.12759	0.1204	-0.10192	0.0914	0.07551	0.07034	0.07912	-0.06243	-0.06197	0.06073	0.05855	-0.05504	-0.04772	0.05146	-0.05317	0.05245	0.05124	0.04839	0.04674	-0.04841	-0.04747	0.05483	-0.05642	0.05163	-0.04885	-0.05164
	0.77451	-0.37349	-0.22733	0.12798	0.12041	-0.1022	-0.0929	0.07573	0.07047	-0.07929	0.06253	0.06206	0.06084	0.05856	-0.05578	-0.04796	0.05164	0.05374	0.05265	-0.052	0.04844	-0.04679	-0.04844	-0.04751	0.05483	-0.05674	0.05168	-0.04892	-0.05225
	0.77742	-0.37498	-0.2275	0.12961	0.12183	-0.10392	0.09293	0.07597	-0.0705	0.07931	0.06341	0.06217	0.06091	-0.05946	0.05593	0.04802	0.05203	0.05396	-0.05266	0.053	-0.04848	-0.04714	-0.04869	0.04771	0.05484	-0.05679	0.05171	0.04938	0.05231
	0.77831	-0.37776	0.23188	-0.13195	0.1226	-0.10467	0.09356	0.07618	0.07294	-0.08018	-0.06355	-0.06226	0.06109	0.05954	-0.05598	0.04822	0.0526	0.05464	-0.05303	-0.05344	-0.04857	0.04718	-0.04873	0.04771	-0.05512	-0.05706	0.05184	0.04949	0.05266
	0.77881	0.37907	0.2337	0.13225	-0.12331	0.10496	0.09367	-0.07674	-0.07324	-0.0812	-0.06382	-0.06231	-0.06122	-0.05961	0.05605	0.0483	-0.0529	-0.05501	0.05343	0.05349	-0.04884	0.04735	0.04889	-0.04793	-0.05602	0.05748	0.05208	0.04974	-0.05306
	0.78036	-0.37964	0.23641	-0.13258	0.12805	-0.10509	-0.09392	0.07737	0.0737	0.08141	0.06385	0.06441	0.06126	0.06005	0.05622	0.04988	-0.0538	0.05532	0.05366	0.05413	-0.04887	-0.0474	-0.04925	-0.04857	-0.05607	0.0579	0.0521	0.0501	0.05311
	0.78248	0.38008	-0.2373	0.13269	-0.12967	-0.10531	-0.09461	0.07901	-0.07423	-0.08157	-0.06396	0.0647	0.06133	0.06014	-0.05634	-0.04996	-0.05501	0.05535	0.05418	-0.05413	0.04969	-0.04753	-0.04932	-0.04879	-0.05633	0.05826	0.05219	0.05084	-0.05326
	0.78358	0.3803	0.23756	0.13355	0.12969	0.10668	-0.09572	0.07949	-0.07432	-0.08161	0.06419	0.06473	-0.06152	-0.06017	-0.05656	-0.05011	-0.05516	-0.05659	-0.05439	0.05429	-0.04971	-0.04861	0.04972	-0.04901	0.05673	0.05831	0.05262	-0.05095	-0.05384
	0.78429	0.38062	0.23766	0.13372	0.13069	-0.10765	-0.09676	-0.08018	0.07437	0.08235	-0.0656	0.06539	0.0617	-0.06043	0.05672	-0.05043	-0.05538	0.05706	0.0546	0.05493	0.04996	-0.04863	0.04982	0.04938	-0.05782	-0.05917	-0.05316	0.05108	-0.05394
	0.78573	0.38193	0.23831	0.13422	-0.13093	0.10809	0.09678	-0.08108	0.07472	0.08273	0.06563	0.06555	0.0619	-0.06049	-0.05679	-0.05051	-0.05606	0.0573	-0.05518	0.05496	-0.05028	-0.04897	0.04983	-0.04956	0.0581	-0.05972	0.0532	-0.05135	-0.05452
	0.78617	0.38678	0.23942	-0.13465	-0.13132	0.10862	0.09695	0.0811	-0.07537	0.08411	0.06623	-0.06583	0.06201	0.0607	-0.05717	-0.05063	-0.05657	0.05772	-0.05524	-0.05503	-0.05078	0.04915	-0.04993	-0.04969	0.05866	-0.0599	-0.05331	0.05147	0.05502
	0.79288	-0.38951	0.2413	-0.13487	0.13228	0.10871	0.09743	0.08157	0.0755	0.08523	0.06687	0.06661	-0.06274	0.06087	0.05725	0.05074	-0.05667	-0.05805	-0.05547	-0.05622	-0.05095	0.0494	0.05001	0.04976	-0.05893	-0.06024	0.05361	0.05154	0.05581
	0.79434	-0.39183	-0.24196	0.13543	0.1328	0.10893	-0.09944	0.08217	-0.0756	0.08607	-0.06919	-0.06682	-0.06318	0.06095	-0.05741	-0.05079	-0.05688	0.0582	0.05562	-0.05649	-0.0512	0.04941	0.05015	0.05163	-0.05898	-0.06026	0.05386	0.05173	-0.05585
	0.79464	0.39212	0.242	-0.13609	-0.13333	0.10927	-0.09974	0.08281	0.07585	0.08664	-0.07045	-0.06741	0.06401	0.06106	0.05825	0.05101	-0.0579	-0.05853	0.05565	-0.0569	0.05125	0.04974	0.05022	0.0525	-0.06002	0.06117	0.05392	0.05175	0.05603
	0.79679	0.3928	-0.2491	0.1372	-0.13354	0.11074	0.10017	-0.08349	-0.07593	-0.08677	0.07068	0.06797	-0.06408	0.06129	-0.05866	0.0516	-0.05792	0.05856	-0.05576	0.05691	-0.05151	-0.05006	0.05039	0.05274	0.06029	0.06119	0.05397	0.05176	-0.05607
	0.79754	0.395	0.25006	0.13773	-0.13376	-0.11075	-0.10078	0.08351	-0.07627	-0.08724	-0.07074	0.06822	0.06444	0.06138	-0.06016	0.05167	0.05858	0.05958	0.05646	0.05731	0.05188	-0.05052	-0.05076	0.05292	0.06052	0.06135	-0.05398	-0.05187	-0.05608
	0.79848	0.3956	-0.25035	0.13819	-0.13388	-0.11109	-0.10086	-0.08372	0.07659	0.08748	-0.07076	0.06825	0.06457	-0.06153	-0.06042	-0.05167	0.05885	-0.06001	-0.057	0.05736	0.05203	-0.05068	0.05087	0.05307	0.06084	0.06146	-0.05484	-0.05214	-0.05628
	0.80357	0.39846	0.25202	-0.13859	-0.13411	0.11198	-0.10136	0.08431	0.07661	-0.08784	0.07179	-0.06913	0.06471	0.06166	-0.06051	-0.05212	0.05995	-0.06004	0.05769	0.05746	-0.0521	-0.05136	-0.05115	0.05426	0.06138	-0.06147	-0.05496	0.05219	-0.05631
	0.80407	0.39876	0.25455	0.13944	0.13498	-0.11254	0.10151	0.08443	0.07778	-0.0879	-0.07179	0.06994	-0.0649	-0.06228	0.0607	0.05272	0.0613	0.06029	-0.05805	0.05805	0.05218	-0.05146	-0.05135	0.05435	-0.06149	-0.0618	-0.05502	0.05269	-0.05638
	0.80432	0.39989	0.25519	0.13958	-0.13571	0.11273	0.10178	-0.08617	0.07836	0.08833	-0.0722	-0.06997	0.06529	-0.0624	-0.06231	0.05279	-0.06156	-0.0604	-0.05816	-0.0581	0.05236	0.05153	-0.05142	-0.05467	-0.06169	0.06189	0.05531	-0.05307	0.0565
	0.80719	0.40255	-0.2556	-0.14022	-0.13629	-0.11333	0.10365	0.08636	0.07873	0.08905	-0.07275	0.07002	0.06576	0.06257	-0.06292	0.05337	0.06166	0.0606	0.0584	-0.05845	0.05245	-0.05176	-0.05149	0.05504	-0.0617	0.0621	-0.05532	-0.05317	0.05707
	0.80759	0.41023	-0.25574	-0.14047	-0.13651	-0.11384	0.10528	-0.08732	-0.07907	-0.09005	0.0728	0.07003	0.06615	0.06265	0.06293	-0.05353	-0.06192	0.06065	0.05848	-0.06	0.05299	-0.05179	0.05251	0.05516	0.06238	-0.06212	0.05543	0.05322	-0.05799
	0.80787	-0.41106	-0.25669	0.14385	-0.13667	0.11578	-0.10568	-0.08752	0.07961	-0.0901	-0.07316	-0.07038	-0.06634	-0.06284	0.06349	-0.0538	-0.06204	-0.06066	0.05907	0.06017	0.05426	-0.05197	-0.05261	-0.05533	-0.06257	-0.0622	0.05558	-0.05326	-0.05799
	0.80846	0.41117	0.25728	0.14496	0.13737	0.11613	0.10599	0.08807	0.08007	-0.0903	0.07349	0.07088	-0.06649	-0.06361	-0.06401	0.05505	0.06227	0.06073	0.05914	0.06017	-0.05426	0.05215	-0.05262	0.05567	0.063	-0.06255	0.05599	0.05343	-0.05812
	-0.80862	-0.41145	0.25788	0.14508	-0.13751	0.11632	-0.10684	-0.08879	-0.08096	-0.09035	0.07391	-0.07094	0.0668	0.06396	0.06433	-0.05517	0.06247	0.06074	0.05933	0.06029	0.05427	0.05226	-0.05317	0.0557	-0.06331	0.06305	0.05624	0.05388	-0.05941
	0.81045	0.41336	-0.25808	0.14539	-0.1382	0.11677	0.10813	-0.0889	-0.08116	-0.09038	-0.07454	-0.07118	-0.06722	0.06399	0.06499	-0.05536	0.06256	-0.06144	0.06032	-0.06065	-0.0546	0.05249	0.05381	0.05616	0.0635	-0.06319	-0.05631	-0.05402	0.06018
	0.81104	0.41359	-0.25819	-0.14552	-0.13835	-0.11852	-0.10861	0.09013	0.0816	-0.09063	0.07503	0.07144	0.06737	0.06416	-0.065	0.05543	0.06321	-0.06147	-0.06067	-0.06116	-0.05468	0.05307	0.05386	0.05621	0.06374	-0.06357	0.05651	-0.05416	-0.06023
	0.81208	0.4136	0.25909	0.14591	0.1391	-0.11992	0.10898	0.09053	0.08168	-0.09092	-0.07572	-0.07194	0.06746	0.06432	0.06516	-0.0559	0.06336	-0.06159	-0.0607	-0.06143	0.0548	0.05312	0.05407	0.05661	0.06419	0.06392	-0.05667	-0.05433	0.06114
	0.81217	0.4144	0.25925	-0.14597	0.13962	0.12067	0.11028	-0.0908	0.08249	0.09169	-0.07578	-0.07226	-0.06783	0.06444	-0.06518	0.05687	-0.06346	-0.06174	-0.06099	0.06191	-0.05568	0.05369	0.05487	0.05661	0.06529	-0.0643	-0.0567	-0.05473	-0.06144
	0.81555	0.41546	0.25969	0.14641	-0.1409	-0.12072	-0.1108	0.09276	0.08268	-0.09208	0.07619	0.0724	-0.06797	-0.06506	-0.06544	0.05688	0.06359	0.06195	0.0612	0.06212	0.05585	-0.05381	-0.05501	0.05667	-0.0653	0.06441	0.05673	-0.05475	0.06258
	0.81646	0.41578	-0.268	0.14811	0.14138	-0.12121	-0.1112	-0.09364	0.08271	-0.09211	0.0763	-0.07276	0.06815	0.06512	-0.06592	0.05715	-0.06389	-0.06216	0.06126	0.06228	0.05601	-0.05426	-0.05503	0.05671	-0.06531	-0.06444	0.05682	-0.05555	-0.06286
	0.82134	0.41631	0.26805	-0.15031	0.14146	0.12129	-0.11148	-0.09413	-0.0828	0.09235	0.07643	-0.07276	-0.06861	0.06516	-0.06594	0.05733	0.06398	-0.06226	0.06129	0.06252	-0.05626	-0.05431	-0.05513	0.05701	-0.06546	0.06445	0.05685	0.05589	-0.0629
	0.82492	0.4186	0.27288	0.15033	-0.14328	0.12208	-0.11155	-0.09434	-0.08291	-0.09241	-0.07643	0.07322	-0.0692	-0.06527	0.06618	-0.05779	0.06405	0.06241	-0.06133	-0.06284	-0.05639	0.05468	-0.05529	-0.05726	0.06582	-0.06464	0.05685	0.05592	-0.06303
	0.82502	0.41961	-0.27474	0.1505	0.14369	-0.12227	-0.11171	0.09436	0.08349	0.09254	-0.07702	0.07335	0.06933	0.06531	-0.06658	-0.0578	0.06485	-0.06246	-0.06174	-0.06301	-0.05675	0.05489	-0.05566	-0.05751	-0.06585	-0.06478	-0.05692	0.05664	0.06344
	0.82653	0.42328	0.27492	0.15085	-0.14394	0.12231	0.11213	0.09442	-0.08405	-0.09258	-0.07708	-0.07341	-0.06934	-0.06553	-0.06663	0.05828	-0.06524	-0.06295	-0.06184	0.06307	0.05792	0.05507	-0.05568	0.05753	0.06645	0.06501	-0.0578	-0.05683	-0.0646
	0.82853	0.42383	0.27569	0.15443	0.14417	0.12423	0.11276	0.09568	-0.08505	0.09286	-0.0772	0.07356	0.06991	-0.06556	-0.06685	-0.05865	-0.06541	-0.06331	-0.06203	0.0634	0.05792	0.05528	0.05663	-0.05817	-0.06727	0.06519	-0.05793	-0.05701	-0.06467
	0.8287	-0.42486	-0.27627	0.1545	0.14419	0.12698	0.11436	-0.09578	0.0858	-0.09353	-0.07743	0.0749	-0.07072	-0.0657	-0.06699	0.05891	0.0657	0.06342	-0.06218	0.06345	-0.05806	-0.05557	-0.05688	-0.05883	0.06728	-0.06545	0.05816	0.05719	-0.06469
	0.83128	0.42497	-0.27764	0.15464	0.14519	0.12794	-0.11472	0.09582	-0.08621	0.09358	0.07746	0.07508	0.07118	0.06596	0.06767	0.05898	0.06592	0.06356	-0.06224	-0.06386	0.05815	0.05617	0.05707	-0.05898	0.06733	-0.06549	-0.05827	-0.05726	0.06475
	0.8322	-0.42761	0.27797	0.15588	0.146	-0.12871	0.11514	0.09723	-0.08792	-0.09414	0.07758	-0.07523	0.07122	-0.06667	-0.06832	-0.05899	-0.06609	-0.06425	-0.06245	0.0642	0.05836	-0.05635	-0.05726	0.05904	-0.06792	-0.06552	-0.05904	-0.05747	-0.06549
	0.83451	0.42795	-0.27843	0.15839	-0.14606	0.1293	-0.11519	0.0974	0.08808	0.09441	0.07764	-0.07541	-0.07197	-0.06682	-0.06849	-0.05906	0.06649	-0.06433	0.06246	0.06454	-0.0584	-0.05636	0.05728	0.05934	-0.06811	0.06654	-0.05926	-0.05755	0.06556
	0.83639	-0.42913	0.27855	0.15862	-0.14673	-0.12959	0.11537	0.09775	0.08813	0.09512	-0.07787	0.07702	-0.07202	0.06778	-0.06873	-0.05907	-0.06696	0.06508	0.06282	-0.06456	-0.05864	0.05672	-0.05741	-0.05936	-0.06838	-0.06662	-0.05938	0.05759	0.06574
	0.83642	0.43051	-0.28097	0.16065	0.14698	-0.13051	0.1161	-0.09804	0.08813	-0.09523	0.07793	0.07707	-0.07203	0.06782	0.06904	0.05989	-0.06726	-0.06529	0.06294	-0.0646	0.05873	0.05725	-0.05744	0.05948	-0.06896	-0.06669	-0.05982	0.05772	-0.06603
	0.83669	0.43217	0.28322	-0.16169	0.14762	0.13121	0.11635	0.0982	0.0888	0.09526	-0.07795	-0.07754	0.07251	-0.06783	-0.06929	0.06005	-0.06771	-0.06532	0.06325	-0.06491	0.05876	0.0573	0.0585	0.05995	0.06901	-0.06783	-0.05982	0.05825	0.06654
	0.83843	0.43249	-0.28324	0.16181	-0.14802	-0.13139	-0.1164	0.0983	-0.08885	0.0953	-0.07867	0.07799	-0.0732	0.06796	0.06946	0.06017	-0.06783	0.06534	-0.06354	-0.06513	0.05895	0.05742	-0.05911	-0.0605	-0.06929	-0.06786	0.0601	-0.05831	0.06676
	0.83948	0.43321	0.28375	0.16215	0.14819	0.13164	0.1167	-0.09864	-0.08918	0.09562	-0.07895	0.07815	-0.0733	0.06853	0.06994	-0.06084	0.06789	0.06543	-0.06377	-0.06567	-0.05906	0.0581	-0.05922	0.06085	-0.06975	-0.06789	0.06114	-0.05844	-0.0677
	0.84315	0.43411	-0.28548	0.16293	-0.14914	-0.13244	-0.11796	0.09934	0.08962	0.0957	0.07896	-0.07835	-0.07364	0.06896	0.07006	-0.06147	0.06831	-0.06544	0.06402	-0.06627	-0.06034	0.05816	-0.05924	-0.06098	-0.06986	0.06795	-0.06163	-0.05863	0.06825
	0.84502	0.4345	0.28555	-0.1644	0.15064	-0.13357	0.11879	-0.09995	0.0898	-0.09578	-0.07942	0.07848	0.07412	-0.06899	-0.07008	-0.06188	-0.06841	0.06553	-0.06443	0.06658	-0.06036	0.05863	-0.05928	0.06144	0.06994	0.06808	0.06227	-0.05869	-0.06878
	0.84551	0.43643	0.29019	-0.16453	0.15295	-0.13363	-0.11905	0.10112	0.09159	-0.09646	-0.08003	0.07862	-0.07456	-0.0693	-0.07026	0.06206	0.06886	0.06564	-0.06444	0.0666	-0.06057	0.05868	0.0593	0.06161	-0.07002	0.06821	0.06239	-0.05871	-0.06896
	0.84624	-0.43725	0.29039	0.16492	-0.15334	-0.13433	0.11938	0.10187	-0.09168	0.09718	-0.08027	0.07862	0.07467	0.06942	0.0711	0.06225	0.06937	-0.0657	0.06469	0.0667	0.0607	0.059	0.05942	-0.06197	0.07025	0.0684	-0.06255	0.05876	0.06925
	0.84655	0.43918	-0.29073	0.16539	-0.15365	-0.13476	0.12046	0.10282	-0.09535	0.09837	0.08099	-0.07866	-0.07498	-0.06965	-0.07114	0.06226	0.06945	0.06648	-0.06473	-0.06676	-0.06072	-0.059	0.05974	0.06226	0.07029	0.0686	0.06387	-0.05882	-0.06937
	0.84697	0.43947	-0.29297	0.16557	0.1537	-0.138	0.1213	-0.10299	0.09597	-0.09859	0.08132	0.079	0.07582	0.06988	-0.07155	-0.0623	0.06964	0.06659	-0.06493	-0.06684	0.06112	0.05933	0.05977	0.06304	0.07048	0.0686	-0.06394	0.05905	0.06941
	0.84872	0.44098	-0.29406	-0.16608	-0.15408	-0.13818	-0.12227	0.10373	-0.0967	0.09934	0.08154	-0.0795	0.07644	-0.06999	-0.0718	-0.0624	-0.0702	-0.06662	0.06518	0.06688	0.06112	0.05947	0.06057	0.06369	0.07092	-0.06937	-0.06441	0.05987	0.06945
	0.84964	-0.44326	-0.29648	0.16722	0.15445	0.13872	0.12266	0.10395	0.09694	-0.09948	0.08173	-0.07971	-0.07758	-0.07015	-0.07189	0.06256	-0.07146	-0.06681	-0.0657	-0.06705	-0.0616	0.05992	-0.06059	-0.06404	-0.07121	0.06961	-0.06445	-0.06005	-0.06946
	0.85183	0.44759	0.29675	0.16963	0.1546	-0.13922	-0.12317	-0.10397	-0.09707	-0.09997	0.08174	-0.08068	-0.07829	0.07018	-0.07202	0.06305	-0.07155	-0.06745	0.06591	0.06711	0.0618	-0.06032	-0.06098	-0.06408	0.07154	-0.06989	-0.06507	0.06014	0.06962
	0.85191	-0.44869	0.29928	-0.17055	0.15487	0.13971	0.12328	-0.10421	-0.09743	0.10016	-0.0825	-0.08109	-0.07905	-0.07027	0.07234	0.06316	-0.07179	0.06752	0.06614	-0.06729	0.06217	0.06048	0.06108	-0.0645	0.07233	0.07008	-0.06599	0.06027	-0.06968
	0.85889	0.4502	-0.30003	0.17084	0.15777	-0.14025	0.12331	-0.1049	0.09913	-0.10068	0.08308	-0.08159	0.07943	0.07063	-0.07236	-0.06366	0.07198	0.06777	0.06627	0.06739	0.06226	-0.06051	-0.06125	-0.0646	0.07254	-0.07016	-0.0661	0.06035	-0.0697
	0.86063	0.45087	0.30129	0.17089	-0.1578	0.14037	-0.12362	-0.10552	0.09947	-0.10079	-0.08368	0.08208	0.07965	-0.07076	0.0724	-0.06378	-0.07224	-0.06831	-0.06634	-0.06785	-0.06238	0.06053	-0.06128	-0.06462	0.07255	0.0702	-0.06612	-0.06081	-0.06971
	0.86112	0.45361	0.30369	0.17394	0.15933	0.14062	-0.12374	-0.10577	0.09983	-0.10194	-0.08375	-0.08225	-0.08011	-0.0708	-0.07243	-0.06472	0.07235	0.06838	-0.06648	0.06829	-0.06264	-0.06055	0.06184	0.06481	0.07294	-0.0704	0.06641	0.06082	-0.07061
	0.86175	0.4537	0.30636	0.17403	0.16018	-0.14075	-0.12395	0.10708	0.09993	0.10197	-0.08386	-0.08262	-0.08036	-0.07096	-0.07273	-0.06564	-0.07279	0.06867	0.06725	-0.06864	-0.06293	0.06056	-0.06195	0.06501	-0.07307	-0.07047	0.06752	-0.06087	-0.07067
	0.8626	0.456	0.30653	-0.17423	0.16086	0.14179	-0.12489	-0.10731	0.10069	0.10206	-0.08404	-0.08366	0.0807	-0.07098	0.0731	0.06582	-0.07292	0.06972	-0.06732	-0.06877	0.06348	0.06117	-0.06246	0.06502	-0.07388	-0.07053	-0.06767	-0.06179	0.07142
	0.86291	0.45887	0.30795	0.17546	0.16117	-0.14224	-0.12513	-0.10733	0.10108	-0.1027	0.08475	-0.08478	0.08114	-0.071	-0.07351	0.06587	0.07309	0.07001	-0.06742	0.06928	0.06371	-0.06125	0.06248	0.06548	0.07391	-0.07055	-0.06775	0.06186	-0.0718
	0.86335	0.45906	-0.30835	0.17554	-0.1614	0.14226	0.12566	-0.108	-0.10239	0.10278	-0.08506	-0.08527	0.08209	-0.07113	-0.07399	-0.06634	-0.07353	0.07059	-0.06774	0.06931	0.06438	-0.06138	0.06284	0.0655	0.07419	-0.07098	-0.06783	-0.06216	0.07203
	0.86431	-0.46016	0.30923	0.17661	-0.16276	-0.1424	-0.1258	0.10899	0.10281	0.10282	-0.08508	-0.08548	-0.08219	0.07114	-0.07407	0.06644	0.07369	0.07071	-0.06788	0.0697	-0.06471	-0.06164	-0.06292	0.06556	0.07436	0.07108	-0.06855	0.06246	0.07252
	0.86431	0.46018	0.30977	0.17663	-0.1628	-0.14267	-0.12599	-0.10914	-0.10341	0.10319	-0.08597	-0.0862	-0.08257	0.07117	0.07468	0.06687	0.07374	0.07093	0.06806	0.0702	0.06507	0.06205	-0.0633	-0.06639	-0.07436	0.07166	-0.06936	-0.06277	-0.07257
	0.8656	0.46053	0.30996	-0.17716	0.16299	-0.14381	0.12637	0.11065	-0.10435	0.10447	0.08653	0.08635	-0.0826	0.07218	-0.07479	0.06711	0.07389	-0.07093	0.06814	0.07067	0.06526	-0.06205	0.06466	0.06673	-0.07485	0.07173	0.06995	0.06281	-0.07356
	0.86737	0.46232	0.31003	0.17774	0.16351	-0.14423	-0.12685	-0.11161	-0.10462	0.10458	0.08706	-0.08666	-0.08286	-0.07258	-0.07508	-0.06745	-0.07416	-0.07098	0.06844	-0.07131	-0.06527	0.06209	-0.06504	0.06685	-0.07528	-0.07184	0.06999	0.06286	0.07388
	0.86835	0.46358	0.31023	0.1788	0.16381	0.14424	-0.1273	0.11185	0.10487	0.10476	0.08727	-0.08675	0.08296	0.07293	-0.07548	0.06774	0.07458	0.07111	-0.06894	-0.07139	-0.06535	0.06228	0.06514	0.06777	-0.07535	0.07201	0.07003	0.06365	-0.07391
	0.87126	0.46385	0.31064	-0.17924	-0.16627	-0.14424	0.12759	0.11222	0.10507	0.10492	-0.08733	0.08786	-0.08303	0.07323	-0.07566	-0.06811	-0.07475	0.07134	-0.06947	-0.07139	0.06551	-0.06228	0.06538	-0.06779	0.07571	-0.07275	-0.0703	-0.06406	-0.07454
	0.87222	-0.4665	-0.311	0.18008	-0.1674	0.14447	-0.12816	0.11283	-0.10534	0.10532	-0.08738	-0.08805	-0.08311	-0.0733	-0.07576	0.06824	-0.07485	0.07138	-0.06953	-0.0718	0.06565	-0.06255	0.06543	0.0685	-0.07586	-0.07323	0.07035	0.06438	-0.07473
	-0.87763	0.47259	-0.31135	-0.18062	0.16772	0.14545	-0.12849	-0.1131	0.10607	0.10551	0.08782	0.08813	0.08334	-0.07392	0.07626	-0.06825	0.07522	0.0718	-0.06961	0.07283	0.066	-0.06315	0.06552	0.06862	-0.07602	0.07336	0.07038	-0.06473	-0.07515
	0.8781	0.47346	0.31257	-0.1821	-0.16832	-0.14563	0.12869	0.11612	-0.10658	0.10634	0.08788	0.08818	0.08378	0.07453	-0.07626	-0.06919	0.07534	-0.07277	0.06976	0.07325	0.06607	-0.06359	0.06608	0.06865	-0.07622	-0.07359	-0.07046	-0.06477	-0.07538
	0.87834	0.47431	0.31316	0.18273	0.16841	0.1459	0.12916	-0.11851	0.10673	0.10669	-0.08804	0.08826	-0.08383	0.07453	-0.07629	-0.06947	-0.07564	-0.07294	0.06988	-0.07337	-0.06623	0.06388	-0.06609	-0.06872	-0.07625	0.0739	0.07056	0.06484	0.07568
	0.87947	0.47553	-0.31345	0.18393	-0.16851	-0.14651	-0.12945	-0.11991	0.10679	0.1068	0.08886	0.08856	0.0841	0.07498	-0.07643	-0.06966	-0.0759	-0.07392	-0.06988	-0.07348	0.0663	-0.06392	-0.06609	-0.06926	0.07626	-0.07404	-0.07134	-0.06594	0.07631
	0.88194	0.47611	-0.31347	-0.18429	0.16905	-0.14659	-0.12997	-0.12082	0.10712	0.10692	-0.08906	0.08903	0.08506	-0.07565	-0.07644	0.0697	0.07601	0.07395	0.06994	0.07364	-0.0666	-0.06416	0.06619	-0.06943	0.07632	-0.07458	-0.07139	0.06603	-0.07672
	0.88271	0.47716	-0.31418	-0.18537	-0.16955	-0.14683	-0.13015	-0.12109	-0.10725	0.10767	0.08982	0.08931	0.08507	0.07608	0.07672	-0.07022	0.07605	0.07406	-0.07045	-0.07379	-0.06725	-0.06481	-0.06668	-0.06945	0.07642	-0.07489	0.0714	0.06606	-0.07744
	0.88356	0.47793	-0.31418	0.18714	-0.17074	0.14725	0.13017	0.12123	-0.10745	-0.10771	0.09029	-0.08932	0.08516	0.07637	-0.07672	-0.0709	0.07646	0.0743	0.07101	-0.07388	-0.06755	-0.06483	0.06687	-0.0696	-0.07651	0.07517	-0.07227	0.06663	0.07767
	0.88378	0.4786	-0.31448	0.18833	0.17142	-0.14735	-0.13087	-0.12142	0.10749	0.10793	0.09034	0.08984	0.08575	-0.07658	-0.07684	0.07113	0.07648	-0.07527	-0.07157	-0.07393	-0.06761	-0.06491	-0.06709	-0.0697	0.07698	-0.07521	-0.07235	0.06669	0.07813
	0.88468	0.47951	0.31517	-0.18904	0.17246	-0.14745	0.13131	-0.12226	0.1077	0.10814	-0.09073	0.09005	-0.08621	-0.07686	0.07689	-0.07138	0.07649	-0.07544	-0.07162	0.07394	-0.06762	-0.06496	0.06747	0.07016	-0.07715	-0.07526	-0.07235	0.06696	-0.07823
	0.88752	0.48093	0.31564	0.18908	0.17303	-0.14841	-0.13187	0.12304	-0.10824	-0.10842	0.09076	0.09147	-0.08638	-0.07718	0.07708	-0.07203	-0.07709	-0.07566	0.07295	-0.07397	-0.06798	-0.06517	0.06754	-0.07019	-0.07753	0.07558	-0.07375	0.06723	-0.07871
	0.89003	0.48358	0.31651	-0.18927	-0.1733	-0.14969	-0.13203	0.12366	0.10842	-0.10855	0.09118	-0.09181	0.08673	-0.07732	-0.07716	0.07206	0.07721	0.07605	0.07298	0.07418	-0.06822	0.06743	-0.06798	-0.0704	-0.07792	0.07569	-0.07386	0.06733	-0.07964
	0.8904	0.48447	0.31784	-0.19028	0.17407	-0.15103	0.13307	-0.12372	0.10883	0.10856	0.09273	0.09194	0.08692	0.07744	-0.07744	-0.07226	0.0776	-0.07641	-0.0734	-0.07418	-0.06835	-0.06774	-0.06886	0.07091	0.07829	-0.07609	0.07397	0.0676	-0.07978
	0.89169	0.48678	-0.32048	0.19038	-0.17438	0.15264	0.13374	-0.1245	0.10907	-0.10882	0.09319	0.09206	-0.0874	-0.07747	-0.0776	-0.07246	-0.07771	-0.07667	0.07346	-0.0742	-0.06874	0.06783	-0.07002	0.07139	0.07896	-0.07637	0.07418	0.06828	-0.07979
	0.89448	0.48854	0.32079	0.19164	-0.17465	0.15279	0.13393	-0.12462	0.11035	0.10925	-0.0933	0.09217	-0.08773	0.07749	0.07832	0.07267	0.07861	-0.07693	0.0738	0.07442	-0.069	0.06885	-0.07006	-0.07153	-0.07964	-0.07662	0.07442	0.06844	0.07987
	0.89469	0.48917	0.32316	-0.19242	0.17546	0.15313	-0.13418	0.12554	0.11037	0.10939	-0.0933	-0.09233	0.08793	-0.07761	-0.07841	-0.0727	-0.07877	-0.07721	-0.07451	-0.07519	0.06937	0.06887	0.07027	-0.07166	-0.08013	0.07685	0.0745	0.06875	0.07987
	0.89473	0.48919	0.32317	0.19775	0.17654	0.15333	0.13629	0.126	0.11045	0.10982	-0.09371	-0.09383	0.08839	-0.07852	0.07869	0.07299	0.0788	0.07836	0.07453	-0.07572	0.06996	0.06889	0.07054	-0.07167	-0.08042	0.07687	-0.07489	-0.0691	-0.07998
	0.896	0.49019	0.32417	-0.19809	0.17681	0.15358	0.13642	0.12627	-0.11052	-0.11015	-0.09459	0.09496	-0.08854	-0.07862	0.07889	0.07305	0.07902	0.07852	-0.07547	0.07606	0.07048	0.06909	0.07065	0.07171	0.08049	0.07722	-0.07501	-0.06937	0.08017
	0.89633	0.49024	0.32483	0.20048	0.17743	-0.15358	-0.13972	0.12685	-0.11172	-0.11047	0.0949	-0.09537	0.08881	-0.07869	0.07912	0.07355	0.07962	-0.07898	0.07568	-0.07609	-0.07078	0.0691	0.07088	-0.07174	0.08063	0.07728	-0.07552	0.07033	0.08053
	0.89798	-0.49107	0.32523	0.20048	-0.17796	-0.15434	-0.13985	-0.12732	0.11217	-0.11142	-0.09611	-0.09543	0.08903	0.07882	0.07944	0.07375	-0.08041	0.07934	-0.07592	-0.07643	-0.07103	-0.07014	0.07103	-0.07211	0.08083	0.07742	0.07581	0.07084	0.08079
	0.89899	0.49131	0.32569	-0.20318	-0.17849	-0.15585	-0.14089	-0.12759	-0.11283	0.11195	0.09702	0.09597	-0.08925	0.07884	0.07948	-0.07378	0.08049	-0.07994	0.07624	-0.07646	0.07105	0.07031	-0.07115	0.07214	0.08122	0.07748	-0.07581	-0.07155	-0.08085
	0.90141	0.49205	0.32865	0.20453	-0.1793	-0.1562	-0.14116	0.12765	-0.11339	0.11217	-0.09708	-0.09703	-0.08945	-0.07924	-0.07957	-0.07398	0.08178	-0.08007	-0.07753	0.07686	0.0713	-0.07084	-0.07127	0.07269	0.08128	0.07757	-0.07596	0.07206	-0.08094
	0.90145	0.49321	0.32894	-0.20471	0.17946	0.15651	-0.14128	0.12806	0.11396	0.1122	-0.09739	-0.09764	-0.08972	-0.07928	-0.07965	0.07428	0.08271	-0.08029	0.07776	0.07712	0.07132	0.07193	0.07135	-0.07274	0.08156	-0.07769	0.07602	0.07268	0.08096
	0.90216	0.49623	0.32983	0.20492	0.18073	0.15715	-0.14201	-0.12859	0.11428	0.11262	0.09794	0.09858	0.08996	-0.0796	-0.0802	0.07459	0.08282	0.08038	0.07825	-0.0776	-0.07145	-0.07239	0.07186	-0.074	0.0826	0.07817	-0.07642	0.07274	0.08105
	0.90332	0.49671	0.3306	0.20695	0.1829	0.15873	0.14226	0.12882	-0.11442	-0.1128	-0.09823	-0.09909	-0.09022	-0.07967	0.08041	0.07562	-0.08406	-0.08055	-0.07877	-0.07787	0.07234	0.0724	0.07243	-0.07497	-0.08268	-0.07817	0.07764	0.07321	-0.08141
	0.90675	0.49856	0.3306	0.20831	0.18368	-0.15962	0.14229	0.12885	0.11481	-0.11338	-0.09825	-0.09935	-0.09194	0.08	0.08055	-0.07581	0.08453	0.08057	-0.07909	0.07791	-0.0724	0.07262	0.07325	-0.07511	0.08282	0.07833	0.07831	0.07366	-0.08181
	0.90689	-0.49871	0.33174	-0.20865	0.184	-0.15991	0.14285	-0.12961	0.11481	-0.11369	0.09829	-0.09939	-0.09249	-0.08074	0.08063	-0.07597	0.08484	0.08061	0.07933	0.07901	0.07242	-0.07323	0.07332	0.07516	-0.08289	-0.07837	0.07834	-0.07373	-0.08195
	0.90916	-0.49983	-0.33347	-0.20958	0.18427	0.16045	0.14299	-0.13033	-0.11508	0.11376	0.09831	-0.09942	-0.0925	0.08135	0.0807	-0.0769	-0.08497	-0.08068	0.07944	0.07925	0.07294	0.07345	-0.0739	0.07517	0.08354	0.07849	-0.07935	-0.0739	0.08234
	0.90941	0.50241	-0.33604	0.21048	0.18496	-0.16151	-0.14306	-0.13196	0.11556	0.11393	-0.09955	-0.09963	-0.0927	0.08168	0.08099	-0.0775	-0.08512	-0.08088	-0.07964	0.07951	-0.073	0.07346	-0.07398	-0.07588	-0.08428	0.07868	0.07951	0.07392	0.08241
	0.91022	-0.50294	-0.3375	-0.21053	-0.18627	-0.16243	-0.144	-0.13333	0.11586	-0.1142	0.09967	0.10019	0.0934	0.08214	-0.08144	0.07766	-0.0853	-0.08123	0.08015	0.07963	0.07363	0.0736	0.07473	0.07593	-0.08432	-0.07927	-0.08017	0.07472	-0.08255
	0.91153	0.50461	-0.33775	0.21075	-0.18691	-0.16388	-0.14446	0.13419	0.11638	-0.11429	-0.09967	0.1002	0.09374	0.08215	0.08155	-0.07773	0.08554	-0.08178	0.08073	-0.07963	0.07364	-0.07375	-0.07507	0.07614	0.08454	0.0796	-0.08036	-0.07472	0.08263
	0.91369	0.50548	0.33859	0.21551	-0.1871	0.16419	0.14453	0.13478	-0.11727	0.11514	0.10062	-0.10027	0.09427	0.0823	0.08172	-0.07819	0.08595	0.0826	0.0812	0.07978	-0.07433	-0.07441	-0.07557	-0.07617	-0.08464	-0.08034	-0.08065	-0.07501	0.08263
	0.91372	0.50684	0.34014	0.21734	0.18784	-0.16485	-0.14566	-0.13584	0.11799	-0.11538	-0.10129	0.10035	-0.09473	-0.08232	0.08197	-0.0782	0.08621	0.08283	-0.08127	0.08026	0.07434	-0.07473	0.07558	0.07644	0.08523	0.08039	-0.08085	0.07521	0.08287
	0.91408	0.50726	0.34322	-0.21734	0.18785	-0.16519	0.14582	0.13621	-0.11849	-0.11585	0.10219	0.10035	-0.09474	0.08249	0.08211	-0.07859	-0.08713	0.08303	0.08138	0.0803	0.0749	0.07485	0.07572	0.0771	0.08553	-0.08041	-0.08106	0.07563	-0.08293
	0.91426	0.5085	0.34401	0.21775	-0.18923	0.1653	0.14602	0.13726	0.11992	-0.11655	-0.10224	-0.1004	-0.09475	-0.08274	-0.08216	0.0787	0.08736	-0.08317	-0.08156	-0.08052	-0.07508	-0.07494	-0.07576	-0.07711	0.08554	0.08086	-0.08125	-0.07568	0.08333
	0.91435	-0.5111	0.34415	-0.21806	0.19027	-0.166	0.14689	-0.13747	0.121	-0.11668	0.10236	0.10217	-0.09498	-0.08275	0.08222	0.07877	-0.0876	-0.08397	0.0816	-0.0806	0.07518	-0.07502	-0.07581	0.07732	-0.08567	-0.08088	0.08147	0.07588	-0.08358
	0.91584	0.5121	0.34482	0.21861	-0.19083	0.16637	0.14723	0.13855	-0.12122	0.11841	-0.1026	0.10222	-0.0966	0.08289	0.08226	0.07952	-0.0876	-0.08417	-0.08164	0.08061	-0.07562	-0.07653	0.07634	0.07736	-0.08716	-0.08104	-0.08158	0.07601	-0.08394
	0.91591	0.51303	-0.34574	-0.21901	-0.19245	0.16677	-0.14792	0.13874	0.12199	0.11931	-0.10295	-0.10241	0.09715	-0.08292	-0.08268	-0.08018	-0.08763	0.0842	-0.08198	0.08077	0.07592	-0.07673	-0.07664	-0.07777	0.08734	-0.08115	-0.08175	-0.07624	0.08401
	0.91602	0.5131	0.3471	-0.21947	0.19248	0.16709	-0.14816	0.13916	0.12202	0.11941	0.10516	-0.10351	-0.09727	-0.083	0.08301	-0.08034	-0.0878	0.08458	-0.08235	0.08078	0.07604	-0.07683	-0.07664	-0.07781	-0.08746	0.08123	-0.08202	0.07654	0.08429
	0.91691	0.51478	0.34885	-0.22137	0.19306	-0.16744	0.14826	-0.13933	-0.12215	-0.11995	-0.10541	-0.10352	-0.0973	-0.08396	0.08317	0.08057	-0.08807	0.08493	-0.08265	-0.08107	-0.07634	-0.07699	0.0767	-0.07787	-0.08773	-0.08131	-0.0822	0.07686	0.08448
	0.91704	0.51706	0.34984	0.22253	-0.19311	-0.16794	-0.14848	0.13943	0.12217	0.12003	-0.10602	-0.10375	0.09768	0.08419	0.08361	-0.08074	-0.08868	0.08516	0.08319	0.08125	0.07644	0.07703	0.07695	0.07834	-0.08816	-0.08156	0.08237	-0.07729	0.08507
	0.91726	0.52036	0.35043	0.22401	0.19313	-0.16801	-0.14869	0.13951	-0.12278	0.12036	-0.10609	0.10382	0.09784	0.08431	0.08493	-0.08074	0.08881	0.08578	-0.0846	-0.08127	-0.07728	-0.0775	0.07716	0.0785	-0.08828	0.08258	-0.0826	-0.07792	0.08514
	0.91879	0.52673	-0.35452	-0.2256	-0.19359	-0.16927	0.14884	0.13959	0.12366	0.12088	0.10614	0.10506	0.09784	-0.08442	0.08499	0.08102	-0.08906	0.08581	-0.08492	-0.08171	-0.0777	0.07757	-0.07732	-0.07854	-0.0883	0.08299	0.08334	-0.07793	0.08567
	0.92095	0.52722	0.35564	0.22629	-0.1956	0.17005	0.14898	0.13981	-0.12405	-0.12127	-0.1071	-0.10531	-0.09797	0.08462	0.08507	0.08154	-0.08926	-0.08596	0.08525	-0.0821	0.07837	-0.07779	0.07751	0.07877	-0.0884	-0.08326	-0.08377	-0.07831	-0.08568
	0.92113	0.52816	0.35584	0.22668	0.19647	0.17208	0.14909	0.13999	-0.12468	0.12212	-0.1075	0.10555	0.09798	-0.08484	0.0854	0.08169	0.08939	0.08619	-0.0854	-0.08226	-0.0785	-0.07814	0.07758	0.0788	-0.08857	0.08342	0.08389	-0.07832	0.08572
	0.92167	0.52908	0.35743	-0.22737	-0.19667	-0.17234	-0.14912	-0.14038	-0.12471	-0.12242	0.10796	0.10578	-0.09824	-0.08501	-0.08598	-0.0817	-0.08959	-0.08645	-0.08565	-0.0824	0.07878	0.07876	0.07844	0.07886	0.08876	-0.08378	0.08403	-0.07887	0.08635
	0.92427	0.53097	0.35954	0.22863	-0.19701	0.17423	-0.15036	-0.14039	-0.12542	-0.12353	-0.10814	0.1059	0.09833	-0.08583	0.08629	0.08211	-0.08977	-0.08715	-0.08594	0.08264	0.0788	-0.07944	0.07872	0.07909	0.08893	-0.08383	-0.08407	-0.07924	0.08642
	0.92759	0.53223	0.36008	-0.22933	0.19756	0.17471	0.15064	-0.14046	0.12578	0.12439	-0.1082	-0.10794	0.09842	-0.08599	-0.08647	-0.08291	0.08989	-0.08723	-0.08608	0.0827	0.07888	0.07985	0.07905	-0.07913	-0.08917	-0.08434	-0.08413	-0.07993	-0.08663
	0.93168	0.53316	0.36017	0.22953	0.20048	0.17566	0.15068	0.14167	-0.12593	-0.1246	-0.10822	-0.10806	0.09869	-0.086	0.08664	0.08295	-0.09031	-0.08737	-0.08625	-0.0827	0.07897	-0.08009	0.07912	-0.07949	0.08923	-0.08467	-0.08441	0.08165	0.08694
	0.93419	0.53346	-0.36327	-0.22972	-0.20076	-0.17576	0.15082	-0.14174	0.1261	-0.12466	-0.10823	-0.10825	-0.09884	0.08614	0.08664	0.08349	-0.09091	-0.08767	0.0867	-0.08275	-0.07898	-0.08022	0.07931	-0.07978	0.08923	-0.08486	0.08446	-0.08171	0.08694
	0.93597	0.53576	0.36339	0.2315	-0.20274	0.17583	0.1525	-0.14294	0.12675	-0.12572	-0.10843	-0.10896	-0.09892	-0.08626	0.08676	0.0838	0.09117	0.08771	0.08735	-0.08322	-0.07921	-0.08067	-0.07935	0.07989	-0.08945	-0.08506	0.08448	-0.08176	0.08738
	0.93677	0.53598	0.36532	0.23196	0.20287	-0.17589	0.1529	-0.14368	0.12679	-0.12617	0.10849	0.10976	-0.09907	0.08645	0.08782	-0.08381	-0.09163	0.08779	0.08745	0.08339	0.07922	0.08131	0.07989	-0.08002	-0.08969	-0.08539	-0.08474	0.08204	-0.08758
	0.93679	0.53603	0.36554	0.2326	-0.20298	-0.17611	-0.15331	-0.14375	0.12705	0.12673	0.10896	-0.11064	-0.09969	0.08647	-0.08814	-0.084	0.09184	-0.08792	-0.08758	-0.08358	-0.0794	-0.08176	-0.08082	-0.08032	0.09059	0.08555	-0.08476	-0.08208	-0.08767
	0.93695	0.53835	0.36569	0.23302	-0.20313	-0.17679	0.15352	0.14376	0.12708	0.12687	-0.1091	-0.11081	-0.10061	0.08653	-0.08824	0.08473	-0.09217	-0.08799	0.08772	0.08371	0.07967	-0.08181	0.08085	0.0805	-0.09068	0.08558	-0.08479	0.08221	-0.08779
	0.93711	0.54043	0.36788	0.23341	0.20421	-0.17692	-0.1536	0.14381	-0.12797	-0.12699	-0.10953	0.11216	-0.10101	0.08703	-0.08852	0.0848	0.09244	-0.088	-0.08785	0.08418	-0.07995	0.08232	-0.08133	-0.08074	0.0907	0.08566	-0.08494	-0.08232	-0.08852
	0.93743	0.54097	0.36823	0.23341	-0.20435	0.17702	-0.15451	-0.14426	-0.12826	-0.12745	-0.10965	-0.11297	0.10127	-0.08734	0.08961	-0.08495	0.09289	0.08808	0.08796	-0.08463	0.08011	0.08339	-0.08135	0.08107	0.09094	-0.08582	-0.08573	-0.08241	0.08858
	0.93847	0.54236	0.37182	0.23717	-0.20483	0.17716	0.15541	0.14436	-0.12832	0.12809	0.10998	-0.11319	-0.10214	-0.08752	0.08987	-0.0854	0.09517	-0.08833	0.08799	-0.08491	-0.08024	0.08345	-0.08141	0.08148	-0.09146	-0.08608	-0.08575	0.08256	0.08874
	0.93894	0.54271	-0.3736	0.23926	0.20493	-0.17769	-0.15741	-0.14442	0.12866	0.12903	0.11014	0.11359	0.10234	-0.0882	-0.09032	0.08597	0.0952	-0.08841	-0.08813	-0.08501	-0.08029	-0.08377	0.08147	0.08164	0.09164	-0.08626	-0.08581	-0.0826	-0.08881
	0.93927	0.5428	-0.37398	-0.23962	0.20502	0.17807	0.15751	0.1445	0.12915	0.12928	0.11048	-0.11368	0.10237	0.0884	-0.09047	0.0861	0.09528	-0.0889	-0.08831	0.08534	0.08113	-0.08417	-0.08167	-0.08181	-0.09213	-0.0863	-0.08618	-0.08288	-0.08979
	0.94023	-0.54296	-0.37423	0.23989	0.20569	0.17857	0.15847	0.14484	-0.12946	0.12972	0.11207	0.11427	0.10264	0.08895	-0.09053	-0.08611	-0.09536	-0.08896	-0.08842	-0.08534	0.0813	0.08426	0.08185	-0.08207	-0.09311	-0.08655	-0.08635	0.08314	0.09009
	0.94259	0.54299	0.3743	0.24088	-0.20653	-0.17973	0.15867	0.14486	-0.13005	-0.13006	-0.11208	0.1156	0.10459	-0.08898	-0.09054	-0.08632	-0.09556	0.0894	0.08883	-0.08535	-0.08139	0.0845	-0.08205	-0.0822	0.09386	0.0867	0.08648	-0.08314	-0.09045
	0.94445	0.54499	0.37489	0.2415	-0.2071	-0.17984	-0.15877	0.14495	0.13038	0.13142	0.11242	0.11563	-0.10481	0.08936	0.09063	-0.08647	0.09559	0.0894	-0.08919	-0.0854	-0.0815	-0.08491	0.08211	0.08233	0.09392	0.08693	0.08676	-0.08347	-0.09051
	0.94558	0.54623	0.3749	0.24211	0.20909	-0.18061	-0.15993	-0.14551	0.13084	-0.13161	0.11247	-0.11602	-0.10486	0.08972	-0.0912	0.08655	-0.09582	-0.09013	0.09003	0.0855	-0.08159	-0.08509	-0.08216	-0.08234	0.09423	-0.08698	0.08683	0.0853	-0.09057
	0.94744	0.54638	0.37628	-0.2424	0.20952	0.18097	0.16023	0.14584	0.13109	0.13163	0.11285	-0.11631	0.10487	-0.09055	-0.09124	0.08709	-0.09597	-0.09041	0.09025	0.08577	0.08167	-0.08511	-0.08227	-0.08246	-0.09456	0.08723	-0.08685	-0.08553	-0.09082
	0.94839	0.54717	0.37661	-0.24396	-0.20957	0.18108	0.16047	0.14595	-0.13155	0.13177	0.1132	0.11653	0.10489	0.09071	0.09125	-0.08713	0.09677	-0.09043	-0.09029	0.08603	0.08173	0.08519	-0.08244	-0.08358	0.09485	0.08787	0.08715	0.08567	0.091
	0.94999	0.54775	0.37792	0.2441	-0.20972	-0.18165	-0.16054	0.14619	-0.13316	-0.1331	0.11351	-0.11674	-0.10542	0.09087	-0.09129	0.08769	0.09705	0.09086	0.09047	0.08604	0.08176	0.08606	-0.08249	-0.08405	0.0951	0.08794	0.0872	-0.08627	0.09118
	0.95105	0.54901	-0.3799	-0.24416	-0.20979	0.1817	-0.16113	-0.14632	-0.13394	0.13421	-0.11426	0.11745	-0.10544	0.09089	-0.09166	-0.08808	0.09739	-0.09089	0.09074	-0.08616	0.08183	-0.08654	-0.08259	0.08425	-0.09533	0.08833	-0.0875	0.08637	0.0912
	0.9514	-0.55327	0.38227	0.24499	-0.20979	0.1842	0.16146	0.14636	0.13405	-0.13575	-0.11431	-0.11782	0.10553	0.09143	0.09187	0.08816	-0.09745	-0.09104	0.0909	0.08634	0.08184	0.08685	0.08267	-0.08434	-0.09614	0.08862	0.08766	0.08643	0.09143
	0.95201	0.5541	0.38244	0.24563	-0.21331	0.18438	-0.16349	-0.14671	0.13417	0.1359	-0.1144	0.11827	0.10562	-0.09148	-0.09208	-0.08824	0.09762	-0.09109	0.09095	0.08651	0.08195	0.08717	0.08329	0.0845	-0.09659	-0.08864	0.0877	-0.08671	-0.09146
	0.95528	0.55681	-0.38254	0.24655	0.2134	-0.18466	-0.16371	-0.14787	-0.13463	0.13664	0.11486	0.1185	-0.10593	-0.09201	0.09219	0.08833	-0.09817	0.09115	-0.09103	-0.08656	0.08207	-0.0874	0.08396	-0.0849	0.09717	0.08873	0.08833	0.08718	-0.0917
	0.95548	0.56537	-0.38569	0.24673	-0.21348	-0.18488	-0.16465	0.14811	-0.13502	0.13722	0.11516	-0.11864	0.10661	0.09249	-0.09286	0.08888	0.09832	-0.09117	-0.0913	-0.0867	-0.0821	-0.08764	0.08401	-0.08527	0.09746	-0.08917	-0.08891	0.08728	0.09241
	0.9569	0.56639	0.38629	0.24745	0.21412	0.18576	0.16477	-0.14848	0.13582	0.13734	-0.11517	0.11926	0.10675	0.09256	-0.09338	0.08901	-0.09834	0.09157	-0.09236	-0.0873	-0.08231	0.08782	-0.08422	0.08534	-0.09747	0.0892	-0.08939	-0.0873	-0.09245
	0.95943	0.57213	0.38732	0.24835	-0.21459	0.18598	-0.16543	0.14871	0.13599	-0.13737	-0.11519	-0.11946	-0.1069	0.09273	-0.0939	-0.08913	0.09851	0.09159	0.09237	-0.08751	0.08259	-0.088	0.08464	0.08549	-0.09851	0.08944	0.08944	-0.08775	0.09274
	0.95962	0.57422	0.38749	-0.24859	-0.21468	-0.18618	0.16571	-0.14875	0.13706	-0.13798	0.11557	-0.12035	-0.10709	0.09314	-0.09438	0.08932	0.09856	-0.09167	-0.09239	0.08761	0.08284	0.08919	-0.0847	-0.0859	-0.09857	0.0895	0.08966	-0.08796	-0.09294
	0.96181	0.57794	0.38947	0.24925	0.21515	0.18741	-0.16588	0.14885	0.1375	0.13821	-0.11587	0.12039	-0.10751	-0.09322	0.0948	0.08949	-0.09856	0.09182	-0.09242	-0.08762	-0.08306	0.08924	0.08478	-0.08614	-0.09911	0.09003	0.09007	0.08826	0.09306
	0.96254	0.57944	0.39043	0.2502	-0.21516	-0.18859	0.167	0.1495	0.13777	0.13888	-0.11609	-0.12092	0.10815	0.09411	-0.09502	-0.08958	-0.09863	-0.09191	-0.09341	0.08785	0.08348	-0.08951	0.08531	0.08616	-0.09956	-0.0903	-0.09033	-0.08865	0.09362
	0.9646	0.57955	0.39224	0.25027	-0.21521	0.18898	-0.16705	-0.14965	-0.13915	0.13904	0.1161	0.12096	0.10895	-0.09427	0.09554	0.08969	0.09898	-0.09228	0.09421	0.08825	0.08349	0.09007	0.08538	0.08637	0.09966	-0.09081	-0.09035	-0.08867	0.09376
	0.96582	0.58011	-0.39414	0.25083	-0.21552	0.1894	0.16719	0.14999	0.1396	-0.13925	-0.11632	0.12136	-0.10895	0.09449	-0.09582	-0.08986	-0.09904	0.09237	0.09498	0.0884	-0.08354	0.09062	0.08561	0.08675	-0.09978	0.091	-0.09038	0.08954	-0.09376
	0.96839	0.58398	0.3948	0.25256	-0.21579	0.19049	0.16758	-0.15006	-0.1396	-0.14007	0.11649	0.12205	-0.10941	-0.09471	0.09589	-0.08987	0.09931	-0.09256	-0.09542	-0.08854	-0.08373	0.09081	-0.08576	0.0868	-0.09999	-0.09176	-0.09076	-0.09035	-0.09388
	0.96873	0.58432	0.39663	0.25712	-0.21656	-0.19051	-0.16856	0.15028	-0.13971	0.14205	-0.11665	-0.12349	-0.10965	-0.09471	-0.096	0.08992	-0.09941	0.09263	0.09554	0.08878	-0.0843	-0.09105	0.08642	0.08681	0.10032	-0.09262	-0.0909	-0.09057	-0.09431
	0.97055	0.58899	0.39703	-0.25719	-0.2177	0.19133	0.16867	0.15056	0.13984	-0.14311	0.11677	-0.12388	-0.10978	0.09477	-0.09601	0.09007	-0.0995	-0.09333	-0.0959	-0.0889	0.0844	-0.09111	-0.08695	-0.08729	0.10073	0.09369	0.09149	-0.09089	0.09433
	0.97165	0.59293	-0.39744	0.2578	0.21776	0.19134	0.16943	-0.15071	-0.13984	-0.14321	0.11684	-0.12458	0.10982	-0.0948	-0.09642	-0.09026	-0.09978	0.09335	-0.09597	0.08954	0.08519	-0.09149	-0.08697	0.08757	0.1008	-0.09409	0.09163	0.09172	0.09453
	0.97187	0.59468	-0.40004	-0.2605	0.21793	0.19175	-0.17022	0.15107	0.13988	0.14334	-0.11728	-0.12562	-0.11109	-0.09635	-0.09689	-0.09072	-0.10005	-0.09352	0.09599	-0.08986	0.08561	-0.09197	0.08707	-0.08794	-0.1015	-0.09424	-0.09186	0.09177	-0.09469
	0.97329	0.59622	0.40284	0.26064	0.21882	0.19275	0.17114	-0.15132	-0.14014	0.14402	0.11748	0.12583	-0.1111	-0.09673	-0.09714	-0.09162	0.1002	-0.09355	0.09691	-0.09	0.08586	-0.09243	0.08776	0.0881	-0.10159	0.09449	0.09189	0.09232	0.09473
	0.97855	0.59793	0.40567	-0.26126	0.21951	0.19277	-0.17131	0.1514	-0.14032	0.14409	-0.11749	0.12596	-0.11146	0.09686	-0.09735	-0.09177	-0.10023	0.09361	-0.09779	-0.09003	-0.08587	0.09249	-0.08821	-0.08812	0.10175	0.09455	-0.0919	-0.09234	0.09486
	0.98358	0.59793	0.40641	-0.26377	0.22004	0.19326	0.17223	-0.15198	-0.14103	0.14412	-0.11752	-0.12599	0.11156	0.09701	-0.09761	0.0921	0.10099	0.09398	-0.09799	-0.09023	-0.08624	-0.09269	-0.08848	0.08852	0.10175	-0.09481	-0.09207	0.09237	0.09502
	0.98382	-0.59874	0.40765	0.2638	0.22324	0.19368	0.17257	0.15238	0.14194	0.14423	-0.11922	0.12654	0.11168	-0.09742	0.09809	-0.0924	-0.10102	0.09416	0.09805	0.09071	0.08632	-0.09283	-0.08894	-0.08852	0.10191	0.09509	0.09263	-0.0927	-0.09533
	0.99137	0.60231	-0.40797	0.26487	-0.22443	-0.19378	0.17303	0.15273	-0.14227	0.14486	-0.11935	0.12748	0.11207	0.09764	0.09814	0.09253	0.10107	-0.0948	-0.09814	-0.09079	0.08632	-0.09297	-0.08899	-0.08895	-0.10197	-0.09578	-0.09265	-0.09274	-0.09545
	0.99521	0.60248	0.40876	0.2662	0.22551	-0.19419	0.17308	0.15305	-0.143	0.14498	0.11937	-0.12762	0.11244	-0.09774	-0.09903	-0.093	0.1013	-0.09496	0.0982	0.09141	-0.08677	0.09307	0.089	0.08906	0.10211	-0.09593	-0.09292	-0.09281	0.09572
	0.99532	0.60368	0.41044	0.2666	0.22696	0.19508	-0.1731	0.1532	0.14429	-0.14519	0.11949	-0.12777	-0.11273	-0.09867	-0.09912	-0.09337	0.10185	-0.09554	-0.09831	-0.09196	0.08737	-0.09372	0.08934	-0.09012	-0.10232	-0.09622	0.09346	-0.09344	-0.09574
		0.60411	-0.4116	-0.26676	-0.22743	-0.19519	0.17313	0.1539	0.1443	0.14534	0.11986	-0.12822	-0.11324	-0.09899	0.09975	-0.09344	0.1026	-0.09594	0.09839	-0.09196	0.08781	-0.0952	-0.08947	-0.09031	-0.10244	-0.09653	0.09352	-0.09349	0.09585
		0.60413	0.41293	-0.26696	0.22761	0.19549	0.17326	0.15391	-0.14458	0.14538	-0.11997	-0.1284	0.11386	0.09911	0.10003	0.09368	-0.10288	-0.096	0.09841	-0.09205	-0.08787	0.09544	-0.08957	0.09068	0.10274	0.09727	-0.09443	0.09356	-0.09595
		0.60484	0.41365	0.26716	-0.22927	-0.19582	0.1739	0.15411	0.14479	-0.14577	0.12003	0.12841	0.11412	0.09921	-0.10027	-0.09431	-0.10301	-0.09603	0.09862	-0.09252	-0.08801	-0.0961	0.09078	0.09186	0.10334	0.09735	0.09488	0.09433	-0.09613
		0.60662	0.41373	0.26731	-0.22928	0.19614	0.17426	0.15491	-0.14483	-0.14635	0.12029	0.12863	0.11417	0.09931	-0.10045	0.09459	0.10338	0.09609	-0.09935	-0.09264	0.08817	-0.09614	-0.0912	0.09203	0.10367	-0.0975	-0.09516	0.09435	0.09634
		0.60763	-0.41531	-0.26797	0.22967	-0.19716	0.17441	-0.15553	0.14489	-0.14691	-0.12104	-0.12873	-0.11439	0.09947	0.10093	-0.09495	-0.10394	-0.09609	0.09953	-0.09264	0.08842	-0.09647	0.09139	-0.09211	0.10392	-0.09759	0.09539	-0.09447	-0.09662
		0.61194	-0.41543	0.26913	0.22992	0.19732	0.17459	-0.15581	0.14526	-0.14693	-0.12105	-0.12896	-0.11455	-0.09988	0.10096	-0.09499	-0.10397	0.09614	-0.09956	-0.09309	-0.08873	0.09681	-0.09165	-0.09245	0.10393	-0.09772	-0.09559	0.09463	-0.09712
		0.61199	0.41547	0.27136	0.23033	-0.19786	0.17509	-0.15721	0.14529	0.14726	-0.12171	0.12956	0.11462	-0.10033	0.10131	0.09569	0.10414	-0.09649	-0.09968	0.09314	0.08889	-0.09683	-0.09224	0.09252	0.10437	0.09796	-0.09579	-0.09464	0.09718
		0.61255	0.41685	0.2718	0.23116	-0.19845	0.17522	0.15821	0.14539	-0.14765	0.12185	-0.12977	-0.11481	-0.10074	0.10146	0.09605	-0.10421	-0.09656	0.0998	-0.09323	-0.08925	0.09709	0.09236	-0.09257	-0.10468	0.09808	0.09582	0.09525	-0.09728
		0.61288	0.41707	-0.2718	-0.23141	-0.19946	0.17546	0.15823	-0.14678	0.14782	-0.12189	0.12984	0.11531	0.10106	-0.10209	-0.09606	0.10456	-0.09694	0.09992	-0.09333	0.08932	0.09731	-0.09307	0.09287	0.10475	-0.09818	0.09586	0.0953	-0.09759
		0.61412	0.41802	0.27241	0.23188	0.19985	-0.17592	-0.15846	-0.14715	-0.14795	-0.12237	-0.12988	-0.11538	-0.10162	-0.10211	-0.09622	-0.10469	-0.09731	-0.10002	-0.09351	0.09017	-0.09759	0.09346	0.09321	0.10542	-0.09819	0.09608	0.09547	-0.09781
		0.61484	0.41858	-0.27408	-0.2321	0.20024	0.17648	0.15849	-0.14744	-0.14837	0.12306	-0.12996	-0.11564	-0.10194	0.10248	-0.09642	0.10506	0.0975	0.10019	-0.09357	-0.0902	-0.09765	0.09368	-0.09415	0.10552	0.09854	-0.09623	0.09549	0.09812
		0.61557	0.4202	-0.27478	0.23236	0.20056	-0.17663	-0.1587	-0.1477	0.14865	-0.12325	0.13019	0.11673	0.10195	-0.10273	0.09715	0.10551	-0.0975	0.10039	-0.09391	0.09047	0.09785	0.09384	0.09441	-0.10567	0.09875	-0.09669	-0.09578	0.09821
		0.61609	0.42036	0.27549	0.23511	0.20169	0.17667	0.15959	0.14806	-0.14868	0.1234	-0.13069	-0.11679	-0.10265	0.10292	0.09739	0.1059	-0.09781	0.10098	-0.094	-0.09066	-0.09808	-0.09398	0.09452	-0.1057	-0.09875	-0.09779	0.09587	-0.09822
		0.61716	0.42146	0.27593	0.23531	0.20175	0.1771	0.16011	0.14807	0.14882	-0.12346	-0.13082	0.11687	0.10266	0.10312	0.09775	0.10612	-0.0984	0.10112	0.09405	-0.09105	0.09841	-0.09425	0.09464	-0.1058	-0.09943	0.09798	0.09647	0.09851
		0.61753	0.42495	-0.27651	-0.23598	0.20177	0.17761	-0.16021	-0.14811	-0.14897	0.12407	-0.13104	-0.1169	0.10393	0.10336	-0.09794	0.10646	0.09852	0.1014	-0.09407	0.09137	-0.09863	0.09426	0.0947	0.10582	-0.09996	0.09839	-0.09657	0.09925
		0.61888	0.42513	0.27657	0.23625	-0.20359	-0.17874	-0.16177	-0.14828	0.14922	-0.12433	0.13131	0.11711	0.10398	0.10354	-0.09838	-0.1066	0.09886	-0.10163	-0.09418	0.09181	-0.09867	-0.09476	0.09488	-0.10603	0.10045	-0.09907	-0.09661	-0.09952
		0.62053	-0.4265	-0.27728	0.23654	0.20442	-0.179	0.16197	-0.14872	-0.14943	0.12491	0.1322	-0.11896	0.10408	-0.10457	0.09946	-0.10706	-0.09893	-0.1021	0.09442	-0.09205	0.0994	-0.09494	-0.0949	-0.1061	-0.10136	-0.09978	-0.09691	-0.101
		0.62138	0.42683	0.27809	0.23696	0.20454	0.17939	-0.16237	0.14919	0.14964	0.12493	0.13238	0.11928	-0.10418	-0.10466	0.09948	-0.10744	0.09902	-0.10227	0.09443	-0.09266	-0.09951	0.09496	0.0952	-0.10613	-0.10142	-0.0998	-0.09702	-0.10131
		0.62202	0.42719	0.27978	-0.23774	0.20484	0.17944	-0.16248	-0.14966	-0.15024	0.12522	-0.13255	0.11998	-0.10423	0.10468	0.0996	-0.10745	-0.09902	-0.10381	-0.09449	-0.09293	0.09952	-0.09529	-0.09529	-0.10627	-0.10158	0.09988	-0.09739	-0.10134
		0.62265	-0.4272	0.28132	-0.2384	-0.20563	-0.17987	-0.16332	-0.15007	0.15051	-0.12646	0.13259	-0.12033	-0.10449	0.10482	-0.09961	-0.10809	-0.09937	0.10389	-0.0946	0.09322	-0.09966	-0.09585	-0.09529	-0.10668	-0.10174	0.10032	-0.09757	0.10145
		0.62271	-0.42814	0.28194	0.23912	0.20595	-0.17989	-0.16416	-0.15064	-0.15088	-0.12655	-0.13318	0.12163	0.10511	-0.10527	0.10006	-0.10889	-0.09946	-0.10405	0.09495	0.0933	0.0997	0.0964	0.09607	0.10675	-0.10189	-0.10044	0.09758	-0.10147
		0.62444	-0.42845	-0.28281	-0.23999	0.20617	-0.18027	-0.16426	0.15241	0.15135	-0.12666	0.13336	0.12191	-0.10536	0.10579	0.10054	0.10908	-0.09983	0.10416	0.09512	0.09331	-0.10029	-0.09695	0.09731	-0.10688	-0.10196	0.10075	0.09759	0.10158
		0.62461	0.43005	-0.28319	-0.24227	0.20631	-0.18043	0.16446	0.15336	0.15183	-0.12719	0.13389	-0.12213	0.10552	-0.10597	0.10065	0.10923	-0.09995	-0.10438	0.09516	-0.09374	0.10076	-0.09732	-0.09781	-0.10694	0.10219	-0.10106	-0.09766	0.10194
		0.62465	0.43019	0.2848	0.24304	-0.20678	0.18051	0.1645	0.15366	-0.152	-0.12771	0.13453	-0.1222	-0.10575	0.1066	0.10065	-0.10928	-0.10016	0.10446	-0.09539	-0.09377	-0.10091	-0.09761	-0.09839	0.10697	-0.10268	-0.10142	-0.09782	0.10213
		0.62605	0.43075	-0.28535	-0.24381	0.20748	-0.18083	0.16486	-0.15399	0.15241	0.1278	-0.13459	-0.12223	-0.10606	-0.10673	-0.10076	0.10938	-0.10047	0.10471	0.0958	-0.09391	-0.10092	0.09769	0.09847	-0.10743	-0.10404	0.10178	-0.09787	-0.1023
		-0.63139	0.4309	0.28587	0.24399	0.20765	0.18174	0.16559	-0.15403	-0.15267	0.12835	0.13475	-0.1225	-0.10637	-0.10718	0.10138	0.10958	-0.10079	-0.10484	0.09605	0.09455	-0.10126	0.09771	0.09869	0.10781	0.10425	0.10216	0.09824	-0.10237
		0.63599	0.43415	0.28617	0.24402	0.20896	-0.18176	0.16623	0.1553	0.15451	-0.12903	0.13488	0.12271	0.10693	0.1072	-0.10149	0.10967	-0.10089	0.10503	0.09614	-0.09458	-0.10145	-0.0978	-0.09872	0.10857	0.10432	0.1023	0.09854	-0.10366
		0.63662	0.43492	0.28694	-0.24419	-0.20909	0.18245	0.1665	-0.15541	0.1546	0.12927	-0.1349	0.12341	0.10703	-0.10737	0.10151	-0.11071	-0.10133	0.10514	-0.09653	0.09503	0.1015	0.09799	-0.09916	-0.10879	-0.1045	-0.10233	-0.09875	0.10399
		0.63797	-0.43811	0.2878	-0.24456	-0.20945	0.18251	0.16692	-0.1558	-0.15505	0.12967	-0.1351	-0.12518	-0.10745	0.10764	0.10175	0.11094	-0.10136	0.10536	-0.09663	0.09542	0.10162	-0.09805	0.09932	0.10906	-0.10464	0.10255	-0.09943	-0.10399
		0.63877	0.43921	0.28978	-0.24513	0.21015	0.18269	0.16711	-0.1559	0.15608	-0.12986	-0.13538	-0.12569	0.10746	-0.10773	0.10187	-0.1115	-0.10161	0.10633	0.09678	0.09552	-0.10164	0.09807	-0.09947	0.10922	-0.10471	-0.10299	-0.09967	-0.10437
		-0.64051	-0.44061	0.29013	0.24521	-0.21033	0.18279	-0.16835	-0.15601	0.15614	-0.12996	0.13628	-0.12572	0.10778	0.10782	0.10221	-0.11186	-0.10191	-0.10754	0.09678	0.09556	-0.10177	-0.09812	0.10006	0.10938	0.1048	-0.10366	0.09975	0.1044
		0.64094	0.44081	0.29148	0.24573	0.21043	0.18408	0.16859	-0.15691	0.15623	0.13076	-0.13634	-0.12574	-0.10804	-0.10801	0.10331	-0.11191	-0.10191	0.10822	0.09703	0.09652	-0.10239	-0.09891	-0.10062	-0.10951	-0.10513	0.10378	-0.09995	-0.10447
		0.64095	-0.44139	-0.2924	0.2463	0.21047	-0.18508	0.16871	-0.15744	-0.1563	0.1309	-0.13725	0.12578	-0.10821	-0.10837	-0.10415	0.11194	0.10256	0.10822	-0.09747	-0.09681	-0.10291	0.09893	-0.10088	-0.10972	0.10587	0.104	0.10014	-0.10448
		0.64265	0.44283	0.29268	-0.24654	0.21234	-0.1853	-0.16911	0.15761	-0.15659	0.13186	0.13745	-0.1258	-0.10916	-0.10837	-0.10438	0.11195	-0.10258	0.10838	-0.09758	-0.09746	0.10323	0.09922	-0.10101	0.11038	0.10622	0.10454	-0.10049	-0.10482
		0.64453	-0.44473	0.29279	0.24721	0.213	-0.18558	0.16951	0.1587	0.15666	0.13204	0.13752	-0.12583	-0.10964	0.10848	-0.10439	-0.11238	-0.10274	0.10884	-0.09759	0.09751	-0.10359	0.09937	-0.1012	-0.11108	0.10628	0.10464	0.10085	0.1049
		0.64606	0.44551	-0.29499	0.24739	-0.21334	0.18561	0.17026	0.15944	-0.15674	-0.13242	-0.13754	0.12589	-0.10968	0.1085	0.1044	-0.11255	-0.10324	-0.10937	-0.09764	0.09767	0.10365	-0.09965	0.1013	0.11128	0.1064	-0.10467	0.10086	-0.105
		0.64626	-0.44576	0.29681	-0.24774	-0.21375	0.18591	0.17151	-0.15956	-0.15687	0.13248	0.13827	-0.12599	0.10969	0.10878	-0.10454	-0.11371	-0.10328	0.10967	-0.09868	-0.09778	-0.10394	0.10033	0.10141	-0.11156	-0.10652	-0.10473	0.10104	-0.10501
		0.64671	0.44701	0.2977	0.24794	0.21379	0.186	-0.17157	-0.15982	0.15696	-0.13324	-0.13888	0.12606	-0.10973	-0.10878	-0.10458	0.11396	-0.10335	0.11009	-0.09939	-0.09813	0.10414	0.10041	-0.1015	0.11209	0.10695	-0.10531	0.10122	-0.10503
		0.64883	0.44867	0.30279	0.24835	-0.21462	0.18648	-0.17286	0.16061	0.15702	-0.13411	-0.13941	0.12689	-0.10986	-0.10889	0.10463	0.11416	0.10363	0.11063	-0.09941	0.09857	0.10491	0.10042	-0.10155	0.1121	-0.10703	-0.10541	-0.10146	-0.10506
		0.64919	0.45082	0.30296	0.24849	0.21477	0.18665	0.17339	0.16078	-0.15703	0.13492	0.13942	0.12699	0.11065	0.1089	0.10481	0.11435	-0.10382	0.11082	-0.09952	-0.09857	0.10494	0.10047	0.10159	0.11257	0.1079	-0.10557	0.10151	0.10546
		0.6505	0.45195	-0.30299	-0.24863	0.21502	0.18686	-0.17365	0.16085	-0.15703	0.13501	-0.1399	0.12726	0.11087	-0.1091	0.10599	-0.11497	-0.10422	-0.11087	0.09956	-0.09879	0.10497	0.10073	-0.10178	0.11259	0.10851	0.10564	0.10165	-0.10551
		0.65118	0.45236	0.30343	0.25033	0.21507	0.18687	0.17373	0.16089	-0.15735	-0.13548	-0.1404	0.12796	-0.11102	0.11003	-0.106	0.11527	0.1043	-0.1115	-0.09959	-0.0989	-0.10531	0.10115	0.1021	0.11287	-0.10876	-0.10582	-0.10165	-0.10614
		0.65184	0.45303	-0.30346	0.25052	0.21555	0.18705	-0.17478	-0.16099	-0.15737	-0.1355	-0.14095	0.12817	0.11131	0.11028	-0.10625	-0.11544	-0.10431	-0.11167	-0.09982	-0.09976	-0.10581	-0.10149	0.10213	-0.11331	0.10904	0.10607	-0.10167	-0.10649
		0.65622	0.45529	0.30421	0.25143	0.21651	0.18873	0.17482	-0.16118	0.15745	0.13567	0.1412	0.12883	-0.11189	0.11036	-0.10636	-0.11621	-0.10437	-0.1122	0.10011	-0.1	-0.10634	0.10155	0.10213	-0.11383	0.10911	0.10631	-0.10208	-0.10652
		0.65666	-0.45663	0.30422	0.25146	-0.21836	-0.19036	-0.17572	-0.16142	0.15781	-0.13653	-0.14146	-0.12915	0.11217	-0.11044	-0.10664	-0.11624	0.10439	0.11223	0.10038	0.10053	-0.1069	-0.10174	0.10266	0.11485	-0.10925	0.10702	0.1021	0.1072
		0.65749	0.45782	-0.30432	0.2538	0.21851	-0.19148	-0.17658	-0.16242	0.1588	0.13682	0.14186	-0.12915	-0.11297	0.11047	-0.10702	0.11688	-0.10442	0.11224	-0.10038	-0.10058	0.10762	0.1022	-0.10352	-0.11569	-0.10963	0.10712	0.10227	-0.10725
		0.65767	0.45916	0.30455	0.25392	0.21909	0.19225	0.1788	0.16255	0.1589	-0.13719	-0.14215	0.12935	-0.11303	-0.11121	0.10711	0.11787	0.10451	-0.11224	-0.10072	0.10076	0.10783	0.1024	-0.10375	0.11605	-0.11077	0.10714	0.10271	-0.10757
		-0.66062	0.46042	-0.30515	-0.25398	-0.21945	0.19226	0.17887	0.16285	0.15951	-0.1376	0.1423	0.12967	-0.11307	-0.1114	0.1074	0.11812	-0.10459	-0.11251	0.10088	-0.10137	0.10866	0.10282	0.10409	-0.11649	0.111	-0.10725	0.10334	-0.1077
		0.66232	0.46099	-0.3079	0.25429	0.22062	0.19299	-0.17895	0.16301	-0.15964	-0.13762	0.1424	0.12993	-0.11314	-0.11155	-0.10751	0.11812	0.10462	-0.11316	-0.10108	-0.1015	0.10866	-0.10313	0.10456	-0.11721	0.11125	0.10774	-0.10368	-0.1088
		0.66419	0.46116	0.30936	0.25499	-0.22074	0.19312	0.179	0.16322	0.16084	0.13766	0.14242	-0.12999	0.11326	0.11217	-0.10784	-0.11851	-0.10489	0.11318	-0.10125	-0.10156	-0.10894	-0.1036	0.10465	-0.11741	-0.11126	-0.10779	-0.1042	0.10911
		0.66736	-0.46943	0.31272	-0.25592	-0.22082	0.19349	0.17907	0.16328	0.16095	0.13876	-0.14262	-0.1301	0.11356	-0.11218	-0.1079	0.11865	-0.10521	0.11342	0.10135	0.10303	0.10906	0.10377	0.10477	-0.11746	-0.11154	-0.10784	0.10465	-0.10938
		0.66793	0.47022	0.3131	-0.25621	0.22093	0.19365	-0.17965	0.16335	-0.1612	-0.13888	-0.14376	-0.13016	-0.11381	0.11265	-0.10791	-0.11886	0.10541	-0.11371	0.10152	-0.10316	0.1093	-0.1039	-0.10478	-0.11845	0.11165	0.10799	0.10473	-0.10939
		0.66905	0.47029	-0.31311	-0.25651	0.22169	-0.1937	-0.17985	-0.16435	0.16138	0.13901	0.14451	-0.13029	-0.11389	0.11291	0.10897	0.119	-0.10541	-0.11377	0.10319	0.10343	0.10931	0.10522	0.10508	-0.11856	-0.11172	-0.10828	-0.10529	-0.10943
		0.66979	0.47366	0.31373	-0.25696	0.22179	0.19449	0.18047	-0.16465	-0.16152	0.1393	-0.14467	-0.13082	-0.11401	0.11363	-0.10899	-0.11915	0.10544	0.11378	0.10331	0.10344	-0.10941	-0.10541	0.10549	-0.11887	0.11212	0.10926	-0.10535	0.1097
		0.67241	0.474	-0.31428	-0.257	-0.22236	0.19497	0.18109	0.16537	0.16173	-0.13941	-0.145	0.13131	0.11505	-0.11377	0.10917	0.11943	-0.10609	-0.11423	-0.1037	-0.10357	0.10961	0.10546	-0.10576	-0.11891	-0.11216	-0.1093	-0.10537	0.11036
		0.67249	0.47534	-0.31687	0.25733	-0.22314	-0.19527	-0.18207	0.16616	-0.16177	-0.13949	-0.14559	0.13131	0.11528	-0.11397	-0.10945	-0.11954	-0.10618	-0.11441	-0.10387	0.10371	-0.10964	-0.10551	-0.10656	-0.119	-0.11228	0.10962	-0.10556	-0.11047
		0.67359	-0.47584	0.31785	0.25762	-0.22322	0.19543	0.1823	0.16681	-0.16206	0.13996	-0.14577	-0.13153	0.11537	-0.11416	0.11015	0.11996	-0.10793	-0.11475	-0.10388	-0.10398	-0.10966	0.10573	0.10682	-0.11904	0.1123	0.11071	0.10617	0.11052
		0.67369	0.47667	-0.31791	0.2585	-0.22329	-0.19551	0.18237	0.16722	0.16211	0.14056	-0.14657	0.13174	0.11538	0.11433	0.11043	-0.11999	-0.10811	0.11492	0.1039	-0.10545	0.1097	-0.10576	0.10707	0.11938	0.11237	-0.11085	0.10631	-0.1108
		0.67424	0.47737	0.31816	-0.25965	0.22391	0.19578	0.18239	-0.16728	-0.16225	-0.14058	0.14684	-0.1319	0.11539	0.11435	0.11076	0.1202	-0.10816	-0.11496	0.10391	-0.10562	0.11033	0.10613	0.10761	0.1199	0.11268	-0.11085	-0.10633	0.11089
		0.67433	0.4775	-0.31925	-0.25985	0.224	-0.19582	-0.18263	-0.16837	-0.16281	-0.14063	0.14713	-0.13199	-0.11544	-0.11453	-0.11111	-0.12047	0.10825	0.11505	0.10472	-0.10597	0.11063	-0.10649	-0.10782	0.12016	0.11271	-0.11098	0.10648	0.11108
		0.67484	0.47912	-0.3193	0.26004	0.22415	-0.19588	0.18268	0.16839	0.16306	0.14075	0.14742	0.13272	0.11584	0.11522	0.11115	0.12055	-0.10826	-0.11518	-0.10523	-0.10611	0.11066	-0.10702	0.10834	-0.12069	0.11313	0.11125	-0.1067	0.11138
		0.67632	0.47919	0.32052	0.26021	0.22441	0.1967	0.18276	0.16853	0.16336	0.14077	0.14745	0.13439	-0.11628	-0.11555	-0.1115	0.12063	0.10844	0.11564	-0.10584	0.10625	0.11099	-0.10725	-0.10841	0.12153	-0.11413	-0.11138	-0.10757	-0.11148
		-0.67684	-0.4792	0.32112	0.26076	0.22489	0.19701	0.18317	0.16967	0.16338	-0.14133	-0.1475	-0.13553	-0.11633	-0.11567	0.11216	-0.12102	-0.10873	0.11589	-0.10593	-0.10687	-0.11114	0.10732	0.10858	-0.1217	-0.11421	-0.1114	0.10761	-0.11155
		0.67751	0.4794	0.32255	0.26263	0.22505	-0.19707	-0.18417	0.17023	0.16377	-0.14169	-0.1478	0.13637	-0.11663	0.11586	0.11253	0.12139	0.10909	0.11598	0.106	0.10692	0.11125	-0.10743	0.10891	0.12244	0.11492	0.11169	0.10953	-0.11195
		0.67985	0.47971	0.32413	-0.26345	0.22514	0.19768	-0.18565	-0.17025	0.16435	0.1422	0.1479	0.13658	-0.11719	0.11589	-0.11275	0.12139	-0.10914	-0.11599	0.10638	-0.10711	-0.11227	0.1075	0.10894	-0.12274	-0.11503	0.11175	-0.11027	0.11232
		0.67986	-0.48085	-0.3245	0.26406	-0.22524	0.19845	0.18624	-0.17067	-0.16461	-0.1422	0.14842	-0.1367	0.11732	0.1162	-0.11288	-0.12176	0.10939	-0.11683	0.1065	-0.10739	0.1128	-0.10883	-0.10906	-0.12276	-0.11534	-0.1121	-0.11031	0.11264
		0.68042	-0.4813	0.32456	0.26412	0.22569	0.20023	0.18627	0.17134	0.16636	-0.14238	-0.14863	-0.13674	0.11739	-0.11622	0.1132	-0.12192	-0.11004	0.11712	-0.10667	-0.1076	0.1129	0.10899	0.10919	0.12297	0.11543	0.11219	0.11039	0.11291
		0.68054	0.48269	0.32639	0.2654	0.22569	0.20064	-0.18672	-0.17209	0.1664	0.1427	0.14945	0.13681	-0.11739	0.11626	0.11335	-0.12193	-0.11021	-0.11733	-0.10678	0.10801	0.11293	0.10914	0.10928	-0.12325	0.11646	0.11278	0.11051	0.11365
		0.68247	0.48338	0.3268	-0.26628	0.22684	0.20175	-0.18679	0.17232	0.16681	0.14308	0.14955	-0.13733	-0.11807	0.11634	-0.11358	-0.12285	-0.11036	-0.11735	-0.10727	0.10827	0.113	-0.10931	0.10928	-0.1234	-0.11671	-0.11325	-0.11108	0.11406
		0.68292	0.48356	0.32699	0.26741	-0.22796	-0.20303	-0.18773	0.17258	-0.16744	0.14396	0.14956	-0.13847	0.11882	0.11639	0.11371	0.12298	-0.11145	0.11802	0.10769	-0.10846	0.11332	0.10955	-0.10949	0.12398	-0.11718	-0.11377	-0.11122	0.11421
		0.68305	0.48356	-0.32813	-0.26742	-0.2282	-0.20324	0.18841	0.17322	0.16754	0.14398	-0.14969	-0.13856	-0.11929	-0.11777	-0.11387	0.12347	0.11164	-0.11821	0.10824	0.10916	0.11338	-0.1096	-0.10974	0.12406	0.11726	0.11386	0.11134	-0.11422
		0.68331	0.48378	0.33023	-0.26771	-0.22831	0.20402	0.18951	0.1735	0.16806	-0.144	0.15025	0.13881	0.12007	-0.11812	0.11394	0.12352	-0.11252	0.11842	-0.10834	0.10937	-0.11416	-0.10972	0.10975	0.12421	-0.11737	-0.1139	0.11158	0.11424
		0.6842	0.48701	-0.33107	0.26791	0.22973	0.2047	-0.18957	-0.17458	-0.1687	0.14409	-0.15215	-0.13885	0.12016	-0.11902	0.11503	-0.12375	-0.11279	0.11854	-0.1086	0.10941	0.11483	-0.1099	0.10986	-0.12424	-0.11774	0.11435	0.11181	0.11454
		0.68698	0.4873	0.33307	-0.26807	0.23032	-0.20502	-0.18962	-0.17603	0.16871	-0.14435	0.15258	-0.13887	-0.12024	0.11966	-0.11514	0.12433	-0.11314	-0.11886	-0.1086	0.10957	0.11514	0.11007	0.10988	0.12462	0.11825	-0.11439	0.11188	-0.11476
		0.68698	0.49136	-0.33791	0.26823	-0.23107	0.20558	-0.18997	-0.17633	0.16881	0.14526	-0.15274	-0.13892	-0.12053	-0.11993	0.11557	-0.12435	0.11374	-0.11918	-0.10924	0.10962	-0.11534	0.11043	0.11006	0.12464	-0.11827	0.11471	-0.11194	-0.11535
		0.68875	0.49207	0.33861	0.27045	-0.23109	-0.20723	0.19	0.17634	-0.16885	-0.14531	0.15353	-0.13909	0.12124	0.12021	0.11566	-0.1246	0.11439	0.11973	-0.10977	0.11023	-0.11537	0.11067	-0.11028	-0.125	0.11855	0.11606	-0.11203	-0.11548
		0.69027	0.49217	0.34257	0.27069	0.2318	-0.20898	0.19066	-0.17649	-0.16902	-0.14539	0.15355	0.13975	-0.12125	-0.12046	0.11646	0.12475	0.11472	0.12018	0.11013	0.11039	0.11556	-0.11145	-0.11034	0.12576	0.11857	-0.11619	-0.11217	0.11578
		0.69352	0.49268	0.34306	0.27146	-0.23235	-0.209	0.1914	-0.17663	0.16904	0.14562	-0.15377	-0.13978	-0.12126	0.1207	0.11681	0.12488	0.11514	0.12029	0.11043	0.11058	-0.11557	0.11152	0.11052	-0.1258	0.11858	0.11633	0.11257	-0.1164
		0.69353	0.49373	0.34325	-0.27146	0.23245	-0.20953	0.19159	0.17776	-0.1699	0.14602	-0.15412	0.13988	0.12128	0.12082	-0.11696	0.12501	-0.11517	-0.1205	0.11057	0.11071	0.11567	-0.11189	-0.11052	-0.12662	-0.11885	-0.11662	0.1126	-0.11702
		0.69565	-0.4939	0.3465	0.27382	-0.23327	-0.20992	0.19337	-0.17822	0.17037	0.14603	-0.15423	-0.13988	0.12143	-0.12099	-0.11741	0.12526	0.11524	0.1207	-0.11075	0.11072	0.11585	-0.11221	0.11121	-0.12705	0.11892	0.1172	-0.11262	0.11716
		0.69598	0.49446	0.34775	-0.27725	-0.23336	0.21091	0.19393	-0.17896	-0.17096	-0.14604	-0.15432	0.13989	-0.1218	0.12122	0.11783	-0.12543	-0.11539	-0.12077	0.11105	-0.11082	-0.11591	0.11245	0.11135	-0.12706	-0.11955	0.1173	-0.11272	-0.11732
		0.69691	-0.49448	0.34879	-0.2777	-0.23516	-0.2115	0.19409	-0.1791	-0.17099	-0.14717	-0.15441	0.14011	-0.12269	0.1218	-0.11795	-0.12548	-0.1158	0.12088	0.11128	0.1109	0.11592	-0.1125	0.11139	-0.12737	-0.11964	0.11743	0.11318	-0.11808
		0.69805	-0.49505	0.35165	0.27774	0.2357	0.21171	0.19516	0.17937	-0.17124	0.14773	-0.15473	-0.14101	-0.12295	-0.12229	-0.11837	0.12564	0.11597	-0.12098	0.11212	0.11154	0.11603	0.11257	-0.11151	0.12753	-0.11966	-0.1176	-0.11323	0.11816
		0.69882	0.49686	0.35288	-0.27774	0.2357	-0.21231	0.19525	0.18016	0.17143	0.14804	-0.15556	0.14119	-0.12305	-0.12231	-0.11917	0.12581	-0.11634	-0.12119	-0.11217	-0.112	-0.11629	-0.11269	0.11161	0.1277	-0.11972	-0.11837	-0.11348	-0.11859
		0.70028	0.49713	-0.35401	-0.27983	-0.23584	0.21411	-0.19554	0.18041	0.17192	0.14881	0.15599	0.14121	0.12319	-0.12286	-0.11917	0.1261	-0.11637	-0.12226	0.11315	0.11259	-0.11656	-0.11281	-0.11261	0.12779	0.11976	-0.11849	-0.11376	-0.11862
		0.70099	-0.49878	-0.35603	0.28005	0.23651	0.21415	0.19561	-0.18049	0.17257	0.14904	0.15614	0.14123	0.12389	0.12354	-0.11927	-0.12616	0.11669	-0.12229	0.11344	-0.11333	0.11668	0.11325	0.11265	-0.12804	-0.11979	0.11853	-0.11428	0.11878
		0.70213	0.49898	-0.35627	0.2806	-0.23678	0.21481	0.19703	0.18057	0.17347	-0.1493	-0.15619	-0.14148	-0.12478	0.12391	-0.11955	0.12621	0.11677	-0.12237	-0.11347	-0.11369	-0.11774	0.11344	0.11268	0.12831	-0.11986	0.11872	-0.1144	0.11892
		0.70227	0.50097	0.35648	0.2809	0.23723	0.21523	0.19723	-0.18082	-0.17348	-0.14965	0.15641	0.14163	0.12513	0.12454	0.11962	0.12651	-0.11678	-0.12258	0.11375	0.11403	0.11801	0.11369	-0.11273	0.12832	0.12025	0.11927	-0.11516	0.11909
		0.70227	0.5018	0.35866	0.28257	0.23729	-0.21541	-0.19728	-0.18096	-0.17405	0.14973	-0.15697	0.14188	-0.12564	-0.12548	-0.11978	0.12653	0.11734	0.12269	-0.11388	-0.11413	0.1184	0.11403	0.11315	-0.12843	0.12025	-0.11953	0.11565	-0.11923
		0.70255	0.50279	0.35913	0.28287	0.23755	-0.2163	-0.1981	0.18152	0.17487	0.14997	-0.15725	-0.14253	-0.12675	-0.12549	-0.11988	0.12704	-0.11776	0.12272	0.11411	0.11441	-0.11861	0.11404	0.11379	0.12861	-0.12028	0.11975	0.1163	-0.1193
		0.70273	0.50452	0.35928	0.28375	0.23884	0.21773	0.19836	-0.18172	0.17503	-0.15001	0.15736	-0.14254	0.12714	0.12568	-0.12001	0.12719	-0.11779	-0.12275	-0.11415	-0.11528	-0.11875	0.11428	0.11394	0.12879	-0.12093	-0.11984	-0.11666	-0.11984
		0.70368	-0.50475	0.36018	0.28375	0.2391	-0.21823	-0.19838	0.18176	0.17503	-0.15078	-0.15743	0.14297	0.12767	-0.12572	-0.12051	-0.1277	0.11849	-0.12281	0.1148	-0.1154	0.11914	0.11478	0.11439	-0.12887	0.12132	-0.11984	0.11697	0.11989
		0.70403	0.50516	-0.36091	-0.28478	0.23934	0.21873	-0.19854	0.18219	0.17514	-0.15078	0.15764	0.14321	0.12773	-0.12602	-0.12107	0.12788	0.11894	0.12293	0.11516	-0.11606	-0.11953	-0.11479	-0.11457	-0.12932	-0.12138	0.12034	-0.11698	0.1199
		0.70404	0.50557	0.36189	0.28572	-0.24003	0.219	-0.1986	-0.18269	0.17517	0.1516	-0.15836	-0.14357	-0.12798	0.12655	-0.12148	-0.12865	0.11913	0.12329	-0.11516	0.11646	-0.1197	0.11538	-0.11457	0.12951	-0.12176	-0.12052	0.1175	-0.12036
		-0.70435	0.50604	-0.36304	0.28572	-0.24031	0.21907	-0.19956	-0.18304	0.17621	0.15185	-0.15901	0.1446	0.1282	0.12681	0.12203	0.12868	-0.11946	-0.12329	0.11648	0.11662	0.11972	0.11585	0.11504	0.12955	-0.12201	0.12105	-0.11761	0.12052
		0.70484	0.50608	0.36334	0.28693	-0.24112	-0.21909	0.19957	-0.18344	0.17679	0.15286	0.15907	-0.14477	0.12887	-0.12711	-0.1223	-0.12873	-0.11946	-0.1237	0.11656	0.11679	0.12024	-0.11598	-0.11536	-0.1304	-0.12209	-0.12119	-0.11766	-0.12083
		0.7057	-0.50633	0.36469	0.28699	0.24142	-0.21992	-0.20023	0.18379	0.17703	0.15309	-0.15946	0.14492	-0.12888	0.12727	0.12239	0.12912	0.12013	-0.1238	0.11683	0.11714	0.12038	-0.11611	-0.11593	-0.13061	0.1224	-0.12121	-0.11787	-0.12128
		0.70774	0.5068	-0.36474	0.28869	-0.24198	0.22019	0.20225	0.1838	-0.17826	-0.15317	-0.15966	-0.14549	0.12908	0.12747	-0.12289	0.12957	-0.12032	0.12407	-0.11695	0.11728	0.12076	0.11622	0.11647	-0.13062	0.12269	-0.12151	-0.11808	-0.12145
		0.70783	0.50724	0.3648	0.29049	0.2445	-0.22019	0.20227	-0.18413	-0.1783	-0.1532	0.15983	0.14564	0.12935	0.1282	-0.12328	-0.12961	0.1206	0.12409	0.11736	-0.11731	0.12088	0.11761	-0.11654	0.1308	0.12387	0.12196	0.11942	-0.12171
		0.7079	0.50998	-0.36487	0.29056	-0.24579	-0.22074	0.20254	-0.18513	-0.17833	-0.15392	0.16179	0.14566	-0.12945	-0.12859	-0.1237	-0.13046	-0.12091	0.12424	-0.11747	-0.11753	0.12104	-0.1177	0.11682	-0.131	0.12424	-0.12197	0.11963	0.12187
		0.71088	0.51039	0.3651	0.29071	0.24645	0.22349	-0.20271	0.18579	-0.17883	-0.15396	-0.16192	-0.1457	0.12994	-0.12864	0.1239	0.1306	-0.12106	0.12434	-0.11828	0.11756	0.12144	-0.11838	-0.11711	-0.13105	-0.12426	0.12218	0.12051	0.12263
		0.71187	0.5108	0.36597	0.29228	-0.24674	-0.22375	0.20433	0.18602	0.17937	0.15409	-0.16209	0.14605	0.13027	0.12938	-0.12391	-0.13094	0.12142	-0.1244	-0.11833	0.1184	-0.1215	-0.11852	0.11714	-0.13223	-0.12429	0.12246	0.12069	0.12273
		0.71251	0.51119	0.36604	0.29342	0.24842	0.22395	0.20468	-0.18742	-0.17958	0.15413	-0.16226	-0.14626	0.13073	-0.12978	-0.12408	-0.13111	-0.12145	-0.1245	0.1185	-0.11864	0.12151	0.11859	-0.11772	-0.13232	0.12447	0.12313	0.12085	0.12277
		0.71297	0.51138	0.36661	-0.29568	-0.24846	0.22408	0.20633	-0.18783	0.17987	-0.15416	-0.16234	0.14675	0.13119	0.13019	0.12436	0.13116	0.1222	0.1246	0.11885	0.11879	0.12226	0.11868	-0.11777	0.13237	0.12456	0.12318	0.12091	0.12298
		0.7134	0.51459	0.36859	0.29614	-0.24959	0.2245	-0.20673	0.18796	-0.18055	-0.15423	0.16333	0.14705	0.1317	-0.13038	0.12511	0.13139	-0.12244	-0.12476	-0.11908	0.11922	-0.12304	0.11891	0.11784	-0.13298	-0.12458	-0.12319	0.12152	-0.12345
		0.71386	0.51635	0.36956	0.29649	0.25331	0.2253	-0.2068	0.18804	0.1812	0.1546	-0.16336	-0.14821	-0.13173	0.13047	0.12531	0.13142	0.12245	0.12503	0.11934	0.1193	-0.12304	0.1196	0.11786	0.13348	-0.12466	-0.12319	-0.12153	0.12354
		0.71444	0.51927	-0.36967	-0.29687	0.25372	-0.22776	0.20703	-0.18828	0.18156	-0.15478	-0.16418	-0.14827	0.1325	0.13051	-0.12552	0.13142	-0.12256	0.12523	0.11967	0.1198	-0.12395	-0.1197	0.11847	-0.1336	-0.12524	0.12328	-0.12217	0.12407
		0.71501	0.51952	-0.37084	0.29738	0.2539	0.22789	0.20734	-0.18839	-0.1819	0.15523	0.16428	0.14845	-0.13314	0.13081	0.12582	-0.13229	-0.12257	0.12556	0.12001	0.11983	0.12418	-0.12016	-0.11862	-0.13361	0.12526	-0.12362	0.12295	-0.12408
		0.7163	0.52017	-0.37084	0.29769	-0.25418	0.2279	0.20754	0.18888	0.1821	0.15524	-0.1644	-0.14868	-0.13325	-0.13083	0.1261	0.13354	-0.12308	0.12565	-0.12025	0.12057	-0.12435	0.12029	0.11868	0.13457	-0.12534	0.12368	0.1235	-0.12418
		0.7167	-0.5203	0.37186	-0.2983	-0.25501	0.22925	0.2093	0.18897	-0.18232	-0.15599	-0.16441	0.14905	0.13455	-0.13096	0.12614	0.13369	-0.12321	-0.12589	-0.1205	-0.12093	-0.12459	0.12216	0.11877	0.13472	0.12568	0.12391	0.1235	-0.12418
		0.71849	0.52197	-0.37393	0.29936	0.25549	0.23032	0.20957	0.18903	0.18247	-0.15608	0.16459	-0.14925	0.13504	-0.13099	0.12667	0.13373	0.12372	-0.126	0.12112	0.1211	-0.12477	-0.12216	0.11887	-0.13472	-0.1257	-0.12395	0.12396	-0.12435
		0.71874	0.52199	0.37498	0.29985	-0.25582	-0.23036	-0.20976	0.1892	-0.18263	-0.15683	0.16466	0.14947	-0.13544	-0.13113	0.12681	-0.13449	0.124	0.12611	0.12119	-0.1211	-0.12489	-0.12217	0.11919	0.13514	-0.12612	-0.12408	0.1246	-0.12471
		0.7204	0.52312	0.37632	0.30053	0.25652	0.23163	0.21087	0.1894	-0.1831	-0.15764	0.16549	0.14953	0.13638	0.13118	0.12685	0.1346	0.12417	0.12612	0.12121	0.12153	0.12537	-0.12219	0.11934	0.13517	-0.12638	-0.12515	-0.12475	0.1253
		0.72109	0.52313	0.37813	0.30066	0.25741	-0.23164	-0.21092	-0.18993	-0.1832	0.15767	-0.1655	0.14961	0.13655	-0.13132	-0.12694	0.13498	0.12474	-0.12664	0.12155	0.12244	-0.12555	-0.12239	-0.11934	0.13533	-0.12665	0.12523	-0.1249	-0.12603
		0.7211	0.5258	0.38036	0.30108	0.25909	-0.23194	-0.21244	-0.19001	0.18353	0.15806	-0.16599	0.14996	-0.13664	0.13165	0.12703	0.13517	-0.125	-0.12716	-0.12169	-0.12272	0.12572	-0.12274	-0.12001	-0.13553	-0.12695	0.12529	-0.1254	-0.12628
		0.72129	-0.5268	0.38122	-0.30175	0.25912	-0.23228	0.21326	0.19025	-0.1845	-0.15928	-0.16624	0.15039	-0.13727	0.132	-0.12724	0.13595	0.12588	0.12718	-0.12249	-0.12336	-0.12612	0.12338	-0.12005	0.13557	-0.12734	0.1254	-0.12589	0.12648
		0.72391	0.52745	0.38268	0.3021	-0.25915	-0.23231	0.21433	0.19068	-0.18462	-0.15963	-0.16655	0.15067	0.13728	-0.13213	0.12733	0.13595	-0.12604	0.12772	-0.12258	-0.12341	0.12617	-0.12341	-0.1201	-0.1356	0.12773	0.12556	-0.12635	0.12663
		0.7246	0.52787	0.38344	-0.30232	0.25923	0.23281	0.21527	0.19077	-0.18468	-0.15988	-0.16662	0.15154	-0.138	-0.13236	-0.12809	0.13596	0.12619	-0.12788	0.12311	0.12353	0.12623	0.12385	0.12013	0.13599	-0.1284	0.12573	-0.12669	-0.12667
		0.72562	0.52842	-0.38728	-0.303	-0.25956	0.23325	0.21564	0.19149	0.18473	-0.16038	0.16672	-0.15179	-0.13816	0.13243	-0.12822	-0.13596	0.12631	-0.12813	0.12358	0.12363	-0.12648	-0.12425	0.12015	0.136	-0.12843	0.12625	0.12713	0.12698
		0.72607	0.52863	-0.38753	0.30555	0.25959	-0.23338	-0.21609	-0.1923	-0.18487	-0.16088	0.16698	0.15196	-0.13837	-0.13247	-0.12848	0.13601	0.12632	-0.12825	0.12375	0.12413	-0.12732	0.12432	-0.12091	0.13601	-0.12854	0.12651	-0.12773	0.12703
		0.7262	0.53078	0.38907	0.30577	0.25981	-0.23448	0.21716	0.193	-0.18571	-0.16089	-0.16737	0.15235	-0.13847	-0.1325	-0.12854	0.13604	-0.12658	-0.12891	-0.12393	0.1242	-0.12816	-0.12492	-0.1216	-0.13702	-0.12861	-0.12688	0.12802	0.12718
		0.72666	0.53082	0.38932	-0.30695	-0.26127	0.23479	-0.21779	-0.19325	0.18573	0.16147	0.16795	0.15266	-0.13858	-0.13281	-0.12928	0.13656	-0.12673	0.12902	-0.12442	-0.1249	0.12844	-0.12494	-0.12183	0.13709	0.12904	0.12696	0.12824	0.12724
		0.72669	0.53152	0.38935	-0.30703	0.26202	0.23625	0.21781	-0.19357	-0.18668	0.1615	0.16803	0.15433	0.1387	0.1331	-0.12934	-0.13656	0.12674	-0.1295	-0.1251	0.12492	-0.12847	-0.12523	-0.12207	0.13729	-0.12925	-0.12723	0.12836	-0.12757
		0.72695	0.53543	-0.3903	0.30738	0.26266	0.23643	0.21817	0.19384	-0.18688	-0.16209	0.16854	-0.15453	0.13884	-0.13387	-0.12985	-0.13701	-0.1269	-0.13033	-0.12532	0.12524	-0.1286	0.12529	-0.12214	0.13746	0.12926	-0.12773	0.12962	-0.12847
		0.72943	0.53725	-0.39123	0.30785	-0.26314	0.23841	-0.21915	-0.19391	-0.18696	0.16215	0.17053	0.15458	0.13899	0.13388	-0.1299	-0.13707	-0.12734	-0.1312	-0.12577	-0.1253	0.12931	-0.12529	0.12216	0.13748	0.12943	0.12779	0.12983	0.12882
		0.7302	0.53883	0.39167	0.30829	-0.26316	0.23853	0.22041	0.19431	-0.18703	0.16221	-0.17093	0.15467	0.13971	0.13389	-0.13038	-0.13721	0.1279	-0.13137	-0.12608	-0.12631	-0.1294	-0.12543	-0.12263	-0.13752	-0.12947	-0.12784	0.13017	0.12883
		0.73067	0.53964	0.39261	-0.3091	0.26394	-0.23941	0.22042	0.19452	0.18713	-0.16231	0.17099	-0.15467	0.13987	0.13398	-0.13052	-0.13768	0.12795	-0.13149	0.1262	-0.12636	0.12951	-0.12578	-0.12283	0.13764	-0.13026	-0.12876	-0.13027	-0.12968
		0.7314	0.53978	0.39354	-0.30914	0.26521	-0.24099	0.22047	0.19468	0.18768	0.16279	-0.17105	0.15496	-0.1405	-0.13408	-0.1307	0.13795	0.12813	-0.13246	-0.12702	-0.12682	0.12994	-0.12606	0.12318	-0.13765	-0.13044	0.12878	-0.1305	-0.12997
		0.73344	0.54263	0.3936	0.31171	0.26546	0.24109	-0.22051	0.19519	0.18772	-0.16324	-0.17147	-0.15522	-0.14061	0.13467	-0.13099	0.13799	-0.12881	-0.13255	0.12724	0.12688	0.13002	-0.12631	-0.12328	-0.13766	0.13054	0.12898	-0.13105	0.13022
		0.73364	0.54413	-0.39418	0.31243	-0.26615	0.2414	0.22166	-0.19548	0.18781	0.16428	-0.1715	0.1553	-0.14083	0.13476	-0.13192	-0.13806	-0.12885	-0.13262	-0.1273	0.12691	-0.13012	-0.12647	0.12329	0.13776	0.1309	0.12951	-0.13135	0.13108
		0.73422	0.54495	-0.39485	0.31246	-0.26622	0.24154	0.22198	-0.19551	0.18784	-0.16446	0.17151	0.15542	0.14092	-0.13535	-0.13229	-0.13815	-0.12895	0.13285	0.12766	0.12706	0.13056	-0.12678	-0.12385	-0.13843	-0.13117	-0.13017	0.13136	0.13136
		0.73521	0.54772	0.39609	0.31268	0.26816	0.24157	0.22315	0.19593	-0.18812	0.165	-0.17237	-0.15567	-0.1411	0.13536	0.13266	0.13837	-0.12926	0.1329	0.12882	0.12719	-0.13122	0.12692	0.1239	0.13861	-0.13135	0.13037	0.13165	0.13217
		0.73561	0.54931	0.39623	0.31334	0.26825	-0.24167	0.2233	0.19609	0.18914	-0.1652	-0.17238	-0.15636	-0.14152	-0.13546	-0.13342	-0.13903	0.12986	-0.13313	0.1289	0.12846	-0.13144	-0.127	0.12407	-0.13905	-0.13156	0.13038	0.13225	0.13228
		0.73687	-0.54942	-0.39772	0.31439	-0.27079	-0.24234	-0.22425	-0.19697	-0.19004	0.16541	-0.17288	0.15658	-0.14209	0.13563	-0.13349	0.13905	0.12998	0.13335	0.12902	-0.12864	-0.1315	0.12854	-0.12411	-0.13965	-0.13209	0.13057	0.13239	-0.13231
		0.73741	0.54968	0.39848	0.31626	0.27088	-0.24274	0.2245	-0.19742	-0.1902	-0.16546	-0.17309	0.15696	-0.14213	0.13569	-0.13372	-0.13942	-0.13013	-0.13361	-0.12907	0.12883	0.13231	0.12868	-0.12418	0.13987	-0.13235	0.13109	-0.13253	-0.13289
		0.73852	0.55048	-0.39849	-0.31649	0.27091	0.24294	-0.22471	0.19809	0.19039	0.16547	0.17374	0.15749	0.14245	0.13575	-0.13376	-0.13943	-0.13032	0.13367	0.1296	-0.12897	0.13236	-0.12891	0.12446	0.13995	-0.13339	-0.13133	0.13355	0.13291
		0.74	0.55127	-0.40021	-0.31681	-0.27197	-0.24309	0.22499	0.19831	0.19109	0.16572	-0.17404	0.15847	-0.14269	0.13606	-0.13398	-0.13949	0.13092	-0.13372	-0.12963	0.129	-0.13247	0.12897	0.12455	-0.14002	0.13367	-0.13146	0.13365	-0.13333
		0.74053	0.55231	0.40062	-0.31681	-0.27292	0.24384	0.22537	-0.19857	-0.19173	-0.16598	0.17476	0.15863	0.14305	-0.13649	-0.13401	0.13994	0.13133	-0.1341	0.12977	-0.12907	-0.13344	0.12925	0.12459	-0.14034	0.13383	0.13152	-0.13461	0.13383
		0.74061	0.55245	-0.40292	-0.31717	0.27317	0.24395	0.22582	0.19984	0.19195	0.16603	0.17498	0.15942	0.14355	0.13701	-0.13409	0.14029	0.1314	0.13441	-0.12992	-0.12932	0.13351	-0.12947	-0.12476	-0.1405	0.1339	-0.13202	0.13536	0.13398
		0.74122	-0.55249	-0.40366	0.31848	-0.27482	0.24398	-0.22608	-0.2011	0.19199	0.16629	0.17516	0.1604	-0.14412	0.13755	0.1346	-0.14042	0.13202	0.13449	-0.13072	0.12935	-0.13378	0.12981	0.12478	-0.14061	-0.13453	-0.13233	0.1354	0.13451
		0.74132	-0.55329	-0.40456	0.31955	0.27518	-0.2444	0.22754	0.20153	0.19304	-0.16709	0.17562	-0.1604	-0.14461	-0.13828	0.13544	0.14131	0.13281	0.13478	0.13211	-0.12969	-0.13393	-0.12985	-0.12502	-0.14084	0.13479	0.13234	0.13557	-0.13461
		0.74138	0.55346	-0.40474	0.32011	0.2752	0.24524	0.2276	0.20207	-0.19346	0.16739	-0.17579	0.16048	0.14477	0.13844	-0.1365	-0.14169	0.13287	-0.13513	0.1322	-0.12987	0.13394	0.13003	-0.12527	-0.14129	-0.13496	-0.13263	-0.13571	-0.13472
		0.74242	0.55348	0.40492	0.32048	0.27535	-0.24535	-0.22778	0.20209	-0.19393	0.1675	0.17586	-0.16103	0.14478	-0.13845	-0.1368	0.14206	0.13288	-0.13528	-0.13224	0.12997	-0.13406	-0.13005	-0.12537	0.1415	0.13504	-0.13263	0.13592	0.13534
		0.74345	0.55354	-0.40492	0.32075	0.27619	0.24585	0.22782	0.2026	-0.1945	-0.16795	-0.1764	-0.16115	-0.14623	0.13944	0.13683	-0.14255	-0.13292	0.13544	0.13255	-0.13011	-0.1345	-0.13038	0.12587	0.14169	-0.13507	0.13323	-0.13592	0.1363
		0.74368	0.5552	0.40562	0.32124	-0.27648	-0.24623	0.22786	0.20314	0.19472	-0.1681	0.17759	-0.16134	0.14639	-0.13973	-0.13704	0.14258	-0.1334	0.1359	0.13262	-0.13047	-0.13457	-0.13066	-0.12596	0.14184	-0.13527	0.13337	0.136	-0.13645
		0.74373	0.5555	-0.40638	-0.32233	-0.27661	-0.24716	-0.22869	-0.20341	-0.19487	0.16835	0.1782	-0.16158	-0.1464	-0.14009	-0.13768	-0.14283	0.13372	-0.13618	-0.13271	0.13095	0.13478	-0.13134	-0.12625	0.14189	-0.13534	0.13397	-0.13607	-0.1368
		0.7442	0.55768	0.40753	-0.32375	0.27725	-0.24924	0.22886	0.20365	0.19506	0.16846	-0.17902	-0.16171	-0.14645	0.14083	0.13837	0.14305	0.13384	-0.13642	-0.13321	0.13131	-0.13495	-0.13145	-0.12659	0.14191	-0.13538	-0.13399	-0.13617	0.13718
		-0.74582	0.55783	-0.41146	0.3245	0.27856	0.24943	-0.22923	0.20452	-0.19555	-0.16851	0.18046	0.16176	0.14658	-0.14116	0.13883	0.14308	0.13465	-0.13678	-0.13323	-0.13172	0.13497	-0.13156	-0.12669	0.14217	-0.13541	0.134	-0.13629	-0.13804
		0.74684	-0.5583	0.41188	0.3265	0.27961	0.25003	0.22952	-0.2047	0.19583	-0.16854	0.18094	0.16234	-0.1466	0.14117	0.13935	-0.14373	0.13488	0.13682	-0.13341	0.13251	-0.13506	-0.13179	0.12775	0.1429	-0.13561	0.13402	0.13669	0.13811
		0.748	0.55845	0.41393	0.3271	0.28001	0.25037	-0.22991	-0.20526	-0.19616	-0.16863	-0.18156	0.16307	-0.14661	0.14236	-0.13953	0.14387	0.1352	-0.13717	-0.13358	0.13318	-0.13546	-0.13224	0.12775	0.14292	0.13564	-0.13422	0.13679	0.13814
		0.74818	0.55849	-0.41401	0.32798	-0.28068	-0.25111	0.23043	0.20598	-0.19618	-0.16871	0.18177	-0.16312	-0.14685	0.1425	-0.13984	-0.14399	0.1354	-0.13829	-0.13361	0.13324	0.13601	0.13264	-0.12791	-0.14327	0.13577	-0.13475	-0.13705	0.13816
		0.74876	-0.55858	0.41459	0.32901	0.28081	0.25146	0.23048	-0.20607	-0.1969	0.16924	-0.18179	-0.16323	0.14698	0.14329	-0.13991	0.14425	0.13636	-0.13863	0.13367	-0.13356	0.13626	-0.13271	-0.1285	-0.14335	0.13585	-0.13504	-0.13762	-0.1382
		0.75008	-0.55912	0.41572	0.32915	0.28174	0.25149	0.23048	-0.20647	0.19749	0.16933	-0.18193	0.16429	0.14749	-0.14332	0.14045	-0.14434	-0.13642	0.13882	0.13405	-0.13399	-0.13632	-0.13311	0.12862	0.14428	0.13609	-0.13506	-0.1378	-0.1383
		0.75093	0.56234	0.41608	0.32928	-0.28231	0.25164	-0.23076	0.20701	-0.19755	-0.1705	0.18196	-0.16491	0.14757	0.14345	-0.14064	0.14459	-0.13658	0.13914	0.1342	-0.13438	0.13649	-0.13339	0.12896	-0.14442	0.13703	0.13541	-0.13805	0.13836
		0.75117	0.56282	0.41653	-0.32932	-0.28242	-0.25239	-0.23097	0.20702	0.19795	0.17082	0.1822	-0.165	-0.14782	0.14497	-0.14078	0.14476	0.13668	-0.13919	0.13472	0.13443	0.13747	0.13347	0.12902	-0.14466	-0.13726	-0.13541	0.13809	0.13866
		0.75325	0.56382	0.41679	0.32956	-0.28282	0.25295	0.231	0.20758	-0.198	0.17121	0.18244	-0.16518	0.14787	-0.14508	0.14094	0.14507	-0.13673	-0.13928	0.13473	-0.13444	0.13761	0.1338	-0.12943	-0.14529	0.13737	0.13553	-0.13816	0.139
		0.7533	-0.56454	0.41709	0.32981	-0.2833	0.25305	-0.2314	-0.20812	0.19861	0.17127	0.18329	0.16533	-0.14802	0.14535	-0.14109	-0.14533	0.13676	-0.13983	0.13484	0.13471	0.13766	0.1341	-0.13019	-0.14572	-0.13773	0.13555	0.13866	0.13929
		0.75409	0.56513	0.41739	0.33076	-0.28468	-0.25342	0.23162	0.20822	0.19862	0.17162	0.1841	-0.16548	-0.14894	0.14537	0.1418	0.14558	-0.13683	-0.13987	-0.13493	0.1349	0.13805	-0.13416	0.13027	-0.14574	0.13779	-0.13557	0.13884	-0.13957
		0.75505	0.56556	0.41919	-0.33139	-0.28523	0.25388	-0.23171	0.2092	-0.19868	-0.1723	0.18426	-0.16551	0.1491	-0.1454	0.14205	-0.14588	-0.13689	0.14008	0.13536	-0.13527	-0.1381	-0.13417	-0.13046	0.14581	-0.1381	0.13574	0.13892	-0.14029
		0.756	0.56701	0.42007	0.33211	0.28545	0.25463	0.23199	0.21022	-0.19927	-0.17231	0.18577	0.16821	-0.14915	0.14564	0.14247	-0.14588	-0.13724	-0.14017	0.13592	0.13561	0.13827	0.13442	0.13051	0.14663	0.1383	0.13576	0.13944	0.14064
		0.75758	-0.56895	0.42252	-0.33264	-0.28564	-0.2556	-0.23199	0.21038	-0.19933	0.1724	0.18597	0.1684	-0.14982	0.14582	-0.14263	-0.14603	0.13789	0.14038	0.13614	-0.13568	0.1385	-0.13453	-0.13059	0.14688	-0.13928	0.13608	0.13986	-0.14076
		0.76013	0.56963	0.42287	0.33341	0.28641	-0.25579	0.23262	0.21077	0.19991	-0.17279	-0.18685	0.1692	-0.15073	-0.14695	-0.1429	0.1463	-0.13812	-0.14058	0.13634	0.1358	-0.13883	0.1348	-0.13113	0.14704	0.13963	-0.13619	0.14005	-0.14089
		0.76294	0.57053	-0.42448	-0.33441	0.29099	0.25616	-0.23301	0.21145	0.20035	-0.1729	-0.18698	-0.16927	-0.15099	-0.14697	-0.14305	-0.14634	0.1385	-0.14113	0.13655	0.13581	0.13888	0.13496	0.13137	-0.14738	-0.13969	-0.13677	-0.14042	-0.14148
		0.76554	0.57199	-0.4255	0.33641	-0.2911	0.2563	-0.2331	0.21185	-0.20091	0.17317	-0.18745	0.16984	0.15105	0.14718	-0.14378	0.14636	0.1396	-0.14131	-0.13673	-0.13582	-0.13889	0.135	-0.13179	-0.14757	0.13986	-0.13699	0.14046	0.1416
		0.76559	0.57309	0.4257	-0.33684	-0.29156	0.25631	0.23359	0.21199	0.20099	-0.17347	0.18797	0.17028	0.15256	0.14793	-0.14423	-0.14638	0.13994	0.14147	-0.13717	-0.13624	-0.13943	-0.13502	-0.13197	0.14785	-0.14004	-0.13722	0.14128	-0.14212
		0.76584	0.57509	-0.42846	0.33951	0.29298	-0.25634	0.23388	-0.21228	0.20132	-0.17358	0.18909	-0.17057	-0.15258	0.14811	-0.14465	-0.1466	0.13994	0.14157	0.13808	-0.13672	0.1398	0.13575	-0.13221	0.14826	-0.14037	-0.1374	0.14128	0.14216
		0.76731	0.57546	0.42849	0.34007	0.29338	0.2576	0.23408	-0.21273	0.20233	0.17362	0.19051	-0.17076	-0.15267	-0.14855	0.14488	-0.14673	-0.14005	0.14243	-0.1386	-0.13707	0.13984	0.13603	-0.13234	-0.14833	-0.14048	-0.13777	-0.1416	0.14234
		0.76873	0.57699	0.43071	0.34024	-0.29439	-0.25761	0.23495	0.21283	0.20276	-0.17369	0.19098	0.17134	-0.15339	-0.14876	-0.14493	0.14683	-0.1414	-0.14262	-0.13919	-0.1373	-0.13984	-0.13624	-0.1324	0.14856	-0.14092	-0.13804	-0.1417	0.14252
		0.77149	0.57718	0.43082	-0.3412	0.29532	0.25778	0.23515	-0.21306	0.2034	-0.17381	0.19237	-0.1718	0.15356	0.14916	-0.14494	0.14688	0.14148	-0.14283	-0.13944	-0.13744	-0.14011	-0.13671	0.13241	0.1486	0.14141	0.1382	0.14175	0.14256
		0.77283	0.57854	0.43142	0.34121	0.29672	0.25837	-0.23527	0.21318	0.20349	0.17448	0.19307	0.17192	-0.15428	0.14944	0.14499	-0.1469	-0.14149	-0.14358	0.13966	-0.1375	0.14016	-0.13715	0.13256	-0.14873	0.1418	0.13875	0.14191	0.14287
		0.77315	-0.58013	0.43186	0.34146	-0.29689	0.25849	-0.23527	-0.21321	0.20388	0.17457	0.19319	-0.17202	0.15508	0.15	-0.14537	-0.14709	0.14214	-0.1436	-0.13986	0.13795	-0.14034	-0.13722	0.13285	0.1491	0.14219	0.13915	0.14219	-0.14367
		0.77465	0.5805	0.43319	0.34158	-0.29814	0.26024	-0.23571	-0.21346	0.20392	0.17457	0.1934	-0.1729	0.1551	-0.15057	-0.14539	0.14761	0.14267	0.14432	-0.14007	0.13878	0.14049	-0.13734	0.13314	0.14931	-0.14221	-0.13973	-0.14286	-0.14373
		0.77645	0.5809	0.43608	0.34189	0.29898	-0.26061	0.2358	-0.21347	0.20465	0.17473	0.19384	0.17319	0.15523	0.15058	0.14552	-0.1478	-0.14268	-0.14491	0.14042	-0.13891	0.14055	-0.13748	-0.13368	0.14958	-0.14288	0.14002	-0.14309	-0.14409
		0.77711	0.58114	-0.43633	-0.34275	0.29903	-0.26067	0.23581	0.21368	0.20469	0.1749	0.19389	0.17363	-0.15524	0.15065	-0.14575	0.14803	-0.1427	-0.14511	-0.14066	-0.1395	-0.14079	0.13765	0.13375	0.14998	-0.14293	0.14003	0.14346	-0.14409
		0.77805	0.58172	0.43736	0.34295	-0.29968	0.26079	-0.23759	0.21459	0.20472	-0.17501	0.19401	0.17387	0.1553	0.15111	0.14645	-0.14811	-0.14348	-0.14543	0.14071	-0.13952	-0.14089	-0.13784	-0.13378	-0.15037	-0.14365	-0.14068	-0.14395	0.14432
		0.7785	0.5818	-0.43958	-0.34336	0.30038	-0.26092	0.23804	0.21484	0.20532	-0.17778	-0.19414	0.1739	-0.15571	-0.15128	0.14649	-0.14831	-0.14372	-0.14653	0.14095	0.1396	0.14091	-0.13802	0.13409	-0.15086	-0.14391	-0.14096	0.14404	-0.14446
		0.7805	0.58337	0.44109	-0.34446	0.3009	-0.26242	-0.23821	-0.21505	-0.20633	-0.17787	-0.19568	-0.17498	0.15577	-0.15175	-0.14688	-0.14929	-0.14383	-0.14699	-0.14123	-0.13975	0.14121	0.13809	0.13411	-0.15111	-0.14401	-0.14103	-0.14444	-0.14457
		0.78073	0.58422	0.44195	-0.34459	0.30092	-0.2632	-0.23824	-0.2157	-0.20709	0.17877	-0.19604	-0.17502	-0.15639	-0.15191	-0.14719	-0.14937	0.1445	0.1471	0.14128	0.13982	-0.14187	-0.13822	-0.1347	0.15135	-0.14415	-0.14113	-0.14455	-0.14462
		0.78103	0.58425	0.44243	0.34486	0.30136	0.26324	0.23878	0.21611	-0.2076	-0.17911	0.19656	0.17507	-0.15734	-0.15194	0.14731	-0.14944	0.14452	0.14741	0.14155	-0.14013	0.1421	0.13831	0.13482	0.15177	0.14418	-0.14123	-0.14466	0.14475
		0.78105	0.58809	0.44274	-0.34527	0.3028	0.2634	0.23908	0.21655	-0.20779	0.17982	0.19659	-0.17532	0.15778	0.15299	0.14759	0.14946	-0.14468	0.14745	-0.14166	0.14099	0.14255	0.13903	-0.1356	-0.15179	0.14424	0.14141	0.14493	-0.14489
		0.7816	0.58853	0.44298	0.34553	-0.30306	-0.26348	-0.23929	0.21835	-0.20832	0.17984	0.19667	-0.17655	-0.15778	-0.1533	0.14769	0.14997	0.14506	-0.148	0.14172	-0.14121	0.14267	0.13904	0.13563	-0.15216	-0.14442	0.14165	-0.14497	-0.14506
		0.78418	-0.58897	0.44311	0.34587	-0.30411	0.26356	0.23954	0.21949	0.20837	0.18043	0.1967	0.17738	0.15786	-0.15331	-0.14832	-0.15044	-0.14515	0.14819	0.14188	0.14224	-0.14275	0.13911	0.13638	-0.1532	-0.14482	-0.14216	-0.14499	-0.14521
		0.78493	0.58993	0.44369	0.34693	0.30448	-0.26388	-0.23963	0.21949	-0.2085	0.18092	0.19769	-0.17758	0.15803	0.15346	0.14917	-0.15071	0.14532	0.14845	-0.14203	0.14235	0.14295	0.13914	0.13644	-0.15354	-0.14505	0.14254	-0.14521	-0.14523
		0.78502	0.59097	0.44461	0.34745	0.30496	0.26435	-0.24073	0.21953	-0.20878	0.18163	0.19785	-0.17762	-0.15816	-0.15395	-0.14925	0.15124	0.14726	-0.14848	-0.14204	-0.14243	-0.14303	0.13983	-0.13644	-0.15361	0.14612	-0.14256	0.14539	-0.1455
		0.78538	0.59128	0.4452	0.34747	-0.30496	0.26486	0.24098	-0.22001	0.20881	0.18191	-0.19804	-0.17781	-0.15839	-0.15396	-0.1495	-0.15148	0.14736	0.14916	-0.1421	0.14283	0.14307	-0.13987	-0.13658	0.15372	-0.14613	-0.14314	0.14563	-0.14628
		0.78577	0.59162	-0.44626	-0.34808	-0.30535	0.26509	0.24103	-0.22049	0.20884	0.18273	-0.19812	0.17795	0.15844	0.15399	-0.14981	-0.1518	0.14837	-0.14929	-0.14239	-0.14289	0.14321	-0.13994	-0.13678	0.15375	-0.14621	0.14355	-0.14568	0.14653
		0.7863	0.59248	-0.44668	-0.34808	0.30542	-0.26566	0.24104	-0.22121	-0.20964	-0.18362	-0.19824	-0.17808	0.15873	-0.15468	-0.15032	0.15228	-0.14887	-0.14974	0.14245	0.14304	-0.1436	0.14014	-0.13723	0.15397	0.14649	0.14378	-0.14574	-0.14678
		0.78643	0.59364	0.4471	0.34823	0.30542	-0.26588	-0.24107	0.22131	-0.21016	0.18381	-0.19855	0.17843	0.15878	0.15505	-0.15044	0.15363	-0.14903	0.14992	-0.14252	-0.14369	0.14363	-0.14032	0.13739	0.15403	-0.14676	0.14383	-0.14656	0.14682
		0.78658	0.59547	0.44819	0.34931	-0.30591	0.26596	0.24148	-0.22198	0.21033	0.1841	0.19889	-0.1791	-0.1603	0.15613	-0.15063	-0.15364	0.14906	0.1501	0.1432	0.14445	0.14367	0.14041	-0.13752	-0.15419	0.14677	-0.14398	-0.1466	0.14721
		0.78664	0.59582	-0.44934	-0.3501	-0.30799	0.26624	0.24177	0.22205	-0.21116	-0.18428	0.1991	0.1792	0.16134	-0.15706	0.15075	-0.15409	0.1492	-0.15011	-0.14352	-0.14486	-0.1446	0.14053	0.13772	0.15456	-0.14756	0.14418	-0.14697	-0.14726
		0.78871	0.59748	0.4494	0.35042	0.30823	-0.26669	-0.24222	-0.22303	0.21189	0.18435	-0.1991	0.17935	-0.16172	0.15791	0.15097	0.1543	-0.14972	-0.15042	-0.14364	0.14492	-0.14473	-0.14056	0.13785	0.15473	0.14773	0.14472	-0.14725	0.14751
		0.78871	0.59954	0.44993	0.35165	-0.30869	0.26711	-0.24251	-0.22319	-0.21217	0.18494	0.19967	-0.17935	0.16193	-0.15797	0.15136	-0.15506	-0.15026	-0.15095	0.14371	0.14534	0.14494	0.14066	-0.13805	-0.15495	-0.14793	0.14483	-0.14728	0.14769
		0.78931	0.60163	0.45008	0.3519	-0.3087	0.26721	0.24269	0.22321	0.21273	-0.18505	-0.19968	-0.1798	-0.16204	0.15809	-0.15139	0.15509	-0.15051	0.1516	0.14444	-0.14541	0.145	-0.14068	0.13825	-0.1553	-0.14823	0.1449	0.14733	-0.1478
		0.79184	0.6022	0.45107	0.35325	-0.30873	-0.26832	0.24298	0.22337	0.21312	-0.18524	0.20015	-0.18005	0.16281	0.15825	0.15156	0.15527	0.15061	0.15179	-0.14479	-0.1457	-0.1454	-0.14071	0.13831	-0.15587	0.14829	0.14522	-0.14735	0.1481
		0.79184	0.60463	0.45118	0.35428	0.30975	0.26878	0.24332	0.22425	0.21318	0.18596	-0.20029	0.18011	-0.16313	-0.15846	-0.15206	-0.15557	-0.15093	0.15179	0.14516	-0.14587	0.14574	0.1411	0.13854	0.15618	0.1484	-0.14544	-0.14742	-0.14811
		0.79213	-0.6058	0.45326	0.35593	-0.3109	0.26882	0.24394	0.22466	0.21333	0.18597	-0.2003	0.18013	0.16362	0.15867	-0.15225	0.15564	-0.15143	0.15197	-0.14559	0.14608	-0.14646	-0.1412	0.13868	0.15656	0.14901	0.1456	0.14793	0.14979
		0.79228	0.60849	0.45331	0.35641	0.31143	0.26963	-0.24405	0.22467	-0.21367	-0.18618	0.20069	0.18019	0.16392	0.15885	0.15234	0.15612	-0.15214	-0.15198	0.14561	0.14626	-0.14683	-0.14164	0.13873	-0.1568	0.14915	0.14646	0.14819	-0.15019
		0.794	0.6095	0.45366	0.3565	0.31181	0.27069	0.24413	0.22495	-0.21418	-0.18634	0.20096	-0.18055	-0.1641	0.15891	0.15275	0.15627	0.15251	0.15199	-0.14647	0.14667	-0.14715	-0.14221	0.13876	-0.15708	-0.14918	0.14647	-0.14845	0.15068
		0.79587	0.60999	0.45397	-0.35729	0.31254	-0.27144	0.24484	-0.22513	-0.21444	0.18644	0.20111	0.1808	0.16425	-0.15896	0.15308	0.1571	-0.15272	0.15231	0.14688	-0.1472	-0.14718	-0.14241	0.13886	-0.1571	0.14919	-0.14706	0.14868	0.1509
		0.79925	-0.61018	0.45419	0.35736	-0.31261	0.27184	0.24492	0.22531	0.21483	0.18723	0.2013	0.18083	-0.16427	0.159	0.1535	-0.15798	-0.15301	0.15238	-0.14712	-0.14721	-0.14745	-0.14249	0.13907	-0.15732	-0.14955	-0.14747	0.14895	0.15092
		0.79952	-0.61174	0.45422	0.35776	0.31277	-0.27268	-0.24508	0.2255	0.21483	-0.18736	0.20138	0.18094	0.16442	0.15957	-0.15357	0.15806	-0.15326	0.15277	0.14715	0.14723	-0.14819	0.14267	0.13963	-0.15763	-0.14995	0.14795	-0.14896	0.15108
		0.80065	0.61175	0.4549	0.35823	0.31308	-0.27384	0.24656	-0.22564	0.215	0.18743	-0.20279	-0.18131	0.16567	-0.1599	0.15418	-0.15835	-0.15366	-0.15331	-0.14734	-0.14733	-0.14866	0.14281	-0.14007	-0.1577	-0.15005	-0.14802	0.14936	-0.15132
		0.80518	0.61204	-0.4562	0.35913	0.31323	-0.27405	0.24681	0.22616	-0.21592	0.18744	0.20294	0.18147	-0.16575	-0.1602	-0.15432	0.15861	-0.15378	-0.15343	-0.14741	-0.14755	-0.14869	0.14313	0.14022	-0.15814	0.15065	-0.14824	0.14945	0.15142
		0.80615	0.6133	0.45633	0.36058	0.31574	-0.27453	-0.24728	-0.2276	0.216	-0.18779	0.20326	0.1816	0.16587	0.16075	-0.15434	0.15873	-0.15399	-0.15427	-0.14754	0.14808	-0.14881	0.14374	0.14053	0.15864	-0.15068	0.14834	0.14946	-0.15143
		0.80646	0.61348	0.4582	0.3632	-0.3161	0.27467	-0.24745	0.22781	0.2167	0.18796	-0.20362	-0.18221	0.16631	-0.16099	0.15489	-0.15891	-0.15478	0.15429	0.14871	-0.1481	0.14884	-0.14407	0.14062	-0.15869	-0.15075	0.14911	0.14958	0.15208
		0.80688	0.61366	0.45864	0.36345	0.31641	-0.27502	0.24787	0.22789	0.21735	-0.18821	0.20435	0.18244	0.16644	0.16198	0.15505	0.15911	0.15506	-0.15471	-0.14873	0.14825	0.14898	-0.14447	-0.14084	-0.15893	0.15077	-0.14975	0.15051	0.15217
		0.80795	0.61373	0.46138	-0.36373	-0.31701	-0.27524	0.24834	0.22792	0.21746	-0.18845	0.20437	0.18248	0.16697	0.16216	0.15636	-0.15937	-0.1553	0.1548	0.14878	0.14839	-0.14938	-0.1445	-0.14092	-0.15894	0.1508	0.15063	-0.15106	0.15232
		0.80869	-0.61412	0.46421	-0.36478	0.31837	-0.27548	0.24946	-0.22792	-0.21816	0.18872	-0.20473	-0.18312	0.16748	0.16221	0.15639	-0.15938	0.15695	0.15486	-0.14892	-0.14884	-0.14987	0.14454	0.14108	-0.1592	0.15086	0.1512	-0.15146	0.15256
		0.80994	0.61488	0.46425	-0.36557	-0.31906	0.27581	-0.24948	0.22844	0.21862	0.18911	0.20518	-0.1832	-0.16805	-0.16246	-0.15647	0.16012	0.15789	0.15519	-0.14946	-0.14893	0.15053	-0.14457	-0.14117	-0.15986	0.15088	-0.15156	0.15186	-0.15281
		0.81051	0.61537	0.46473	0.36859	0.31931	-0.27594	-0.24962	0.22844	-0.21872	0.18995	0.20574	-0.18347	0.16807	-0.1626	0.15684	0.1605	0.15902	-0.15575	0.1497	-0.14905	0.15065	-0.14471	0.14156	-0.16072	-0.15091	0.15194	-0.15186	-0.15292
		0.81233	-0.61693	0.46639	-0.36912	-0.32	-0.27597	0.24966	-0.22999	0.21874	0.19027	0.20659	0.1835	0.16853	0.16263	-0.15743	-0.16072	-0.15902	-0.1558	0.15002	-0.14944	0.15067	0.14493	0.14163	-0.16077	0.15096	-0.15219	0.15209	-0.15364
		0.81345	0.61695	-0.46836	0.37055	-0.32004	-0.276	0.25054	0.23012	0.21898	-0.1909	0.20711	-0.18392	-0.16856	0.16279	0.15754	0.161	0.15909	-0.1563	-0.15008	0.15015	-0.15089	-0.14499	-0.14189	-0.1609	-0.15138	-0.15226	0.15227	0.15365
		0.8139	0.61699	0.46837	0.37064	0.32028	0.27613	-0.25105	0.23056	-0.21899	0.19132	0.20847	0.18562	-0.16884	0.16295	0.15765	-0.16129	0.15994	-0.1564	-0.15015	0.15077	0.15096	0.1451	-0.14235	-0.16093	0.15147	0.15323	-0.15285	0.15379
		0.81519	-0.61737	-0.46902	-0.37085	0.32126	-0.27714	0.25178	-0.2306	-0.21934	-0.19156	-0.20848	-0.18604	0.16885	-0.16306	-0.15778	0.16133	0.15999	-0.15664	-0.15022	-0.15213	-0.15127	-0.14527	-0.14281	0.16099	-0.15158	-0.1533	-0.15297	-0.15407
		0.81574	0.61859	0.47005	-0.37165	0.32284	0.27743	0.25207	0.23149	-0.21953	-0.19171	0.20862	-0.18623	0.16913	0.16322	-0.15825	0.16144	0.16041	-0.15679	-0.15028	-0.15248	0.15157	0.14561	0.1431	-0.16123	0.15171	-0.15427	0.15347	0.15417
		0.81834	0.62038	0.47127	0.37188	-0.32316	0.27798	-0.25234	0.23159	0.21975	-0.19212	0.20873	0.18633	-0.16916	0.16341	0.15864	-0.1619	-0.16066	-0.1568	-0.15029	0.15255	-0.15176	-0.14583	0.1432	0.16127	-0.15175	0.15505	0.1536	0.15418
		0.81847	0.62202	0.47283	-0.37241	-0.32334	0.27799	0.25264	0.23254	0.22015	0.19231	0.20888	-0.18682	-0.16938	-0.1636	-0.15905	0.16192	0.16096	0.15718	-0.15039	0.15329	-0.15181	0.14586	0.14353	-0.16195	0.15266	-0.15507	0.15385	0.15458
		0.81984	0.6226	0.47406	0.3733	-0.32366	0.27821	-0.25284	-0.23264	-0.22017	-0.19381	0.20962	-0.18691	-0.16943	-0.16361	0.15906	-0.16202	0.16099	-0.15745	0.1504	-0.15334	-0.15188	-0.14649	0.14353	-0.16328	0.15273	-0.15521	-0.15425	-0.15502
		0.82065	0.6228	-0.47702	0.37556	0.32396	0.27899	0.25303	-0.23322	-0.22019	0.19389	-0.21013	-0.18796	-0.16985	0.16385	0.15924	0.16218	-0.16124	-0.15752	0.15093	0.15336	-0.15195	-0.14653	0.14363	-0.16346	-0.15365	-0.15547	-0.1544	-0.15627
		0.82075	0.62382	0.47751	0.37561	0.326	0.28022	-0.25315	0.23347	-0.22051	-0.19518	0.21024	0.18802	0.16992	0.1645	0.15924	-0.16269	0.16157	-0.15763	0.15193	0.15415	-0.15263	-0.14662	-0.14496	0.16508	-0.15377	-0.15572	-0.15466	0.15629
		0.82227	0.62436	0.47887	-0.37567	0.32644	-0.28048	0.25396	0.2345	0.22052	0.19602	-0.21052	-0.18827	-0.16998	0.16629	-0.15954	-0.16286	0.16168	0.15815	-0.15221	-0.15422	-0.15328	-0.14666	-0.14575	-0.16525	-0.15431	-0.15573	0.15469	-0.1563
		0.82284	0.62461	-0.48003	-0.37727	0.32711	-0.28331	0.25404	0.23468	0.22106	0.19658	-0.21059	-0.1884	0.17057	-0.16659	-0.16	0.16345	0.16178	-0.15853	-0.15226	-0.15422	0.15332	0.14705	-0.1458	0.16546	-0.15444	0.15583	0.15483	-0.15636
		0.82314	0.62612	0.48055	0.37794	0.32732	-0.2835	0.25562	0.2348	-0.22127	0.1966	0.21067	0.18841	0.17074	-0.1666	0.16017	0.16392	-0.16185	0.15887	0.15246	0.15441	-0.15338	-0.14726	0.14591	0.1655	0.15454	0.15629	-0.15506	0.15675
		0.82318	0.62668	-0.48058	0.37807	-0.32778	-0.28363	-0.25589	-0.23498	-0.22136	-0.19703	0.21104	-0.18863	0.17142	0.16665	-0.16032	-0.16408	-0.16216	-0.15913	0.15269	0.15477	0.15341	0.14741	0.14594	-0.16595	0.15479	0.15635	-0.15532	0.15688
		0.82322	0.62757	0.48237	-0.3783	0.32846	0.28374	-0.25614	-0.23552	0.22152	-0.1973	0.21112	0.18882	-0.17178	-0.16674	0.1607	-0.16411	-0.16223	0.15933	-0.15287	0.15533	-0.15396	-0.14743	-0.14617	-0.16615	0.15577	-0.15671	0.15561	0.15721
		0.82531	0.62798	0.48284	0.38103	0.32943	-0.28389	0.25646	-0.23567	0.22156	0.19745	-0.21185	0.18894	0.17181	0.16744	-0.16082	-0.16429	-0.16253	0.15948	0.15298	0.15564	-0.15411	-0.14775	-0.14627	0.16626	0.15581	-0.15695	-0.15683	0.15756
		0.82577	0.6286	0.48291	0.38148	0.33064	0.28451	-0.25717	-0.23571	0.22191	0.19792	-0.21192	0.18917	0.17204	-0.16745	-0.16097	-0.16437	-0.16279	-0.16031	0.15313	-0.15602	-0.15439	0.14793	-0.14628	-0.16626	-0.15586	0.15697	-0.1573	-0.15769
		0.82638	0.62869	0.48294	0.38207	0.33112	0.28454	-0.25736	0.23624	-0.22234	0.19803	-0.21222	-0.18945	0.17273	-0.16751	-0.161	-0.1648	0.1628	-0.1616	-0.15341	-0.15671	-0.15458	0.14824	-0.14647	-0.16628	0.1563	0.15722	-0.15748	0.15786
		0.82647	0.62899	0.4847	-0.38226	0.3335	-0.28502	0.25744	-0.2371	-0.22243	0.19854	0.21227	0.18949	0.17398	0.16827	-0.16123	-0.16535	0.16299	0.16169	0.15344	-0.15734	0.15461	0.14946	0.1465	-0.16688	-0.15635	0.15741	0.15759	-0.15798
		0.8283	0.62943	0.4852	0.38495	-0.33389	-0.28711	-0.25747	-0.23813	-0.22326	-0.19877	0.21237	-0.18977	0.17431	0.16843	-0.1614	-0.16574	0.16306	0.16296	0.15344	0.15814	0.15517	-0.14961	-0.1469	0.16715	0.15647	-0.15786	-0.15761	0.15817
		0.82894	0.63051	0.48577	-0.38551	0.3343	0.28714	0.2579	-0.23891	-0.22337	-0.19882	0.21241	0.18979	0.17451	-0.16894	-0.16148	0.16584	0.16323	0.16339	-0.1536	0.15833	-0.15565	-0.15004	-0.1469	0.16794	-0.15679	0.15904	0.15792	-0.15829
		0.82927	0.63051	0.48764	-0.38589	-0.33464	0.28744	0.25831	0.23902	0.22348	-0.19942	-0.21258	0.19004	0.17489	0.17012	0.16177	-0.16603	-0.16346	-0.16345	-0.15398	-0.15837	-0.15607	-0.15019	-0.14757	0.16804	-0.15707	-0.15904	-0.15816	0.15838
		0.82997	0.63087	-0.4878	0.3861	0.33677	-0.28758	-0.25856	-0.23917	0.22364	0.20051	0.21281	0.19066	-0.17501	-0.17094	0.16193	-0.16606	-0.16357	-0.16358	-0.15414	-0.15926	-0.1567	-0.15117	-0.14796	0.16814	-0.15714	-0.15919	0.15818	0.1587
		0.8302	0.63369	0.48909	0.38678	-0.33951	0.28789	0.25908	0.23926	-0.22383	0.20059	0.21324	-0.19067	-0.17514	-0.17125	0.16223	0.16631	0.16382	0.1637	0.15419	0.15928	0.15689	0.15123	0.14813	-0.16816	-0.15715	-0.15973	-0.15909	-0.15877
		0.83059	-0.63415	0.48921	0.38741	0.34013	-0.28877	-0.25908	-0.23938	0.22405	0.20098	0.21346	-0.19111	0.17519	0.17157	0.16224	-0.16697	0.16399	-0.16395	0.15425	0.15982	-0.157	0.15135	0.14866	0.16888	0.15718	0.15986	-0.15923	0.15924
		0.83136	-0.63516	0.49282	0.38751	-0.34117	0.28879	-0.25978	-0.2399	-0.22435	-0.20208	-0.21424	-0.19117	-0.17567	-0.17185	-0.16226	-0.16745	-0.16409	0.16432	0.15467	0.15982	0.15737	-0.15157	-0.14869	0.16923	-0.15773	0.1604	-0.15931	0.15956
		0.83192	0.63554	0.49304	0.38772	-0.3413	-0.28884	0.25993	0.24004	0.22458	-0.20241	-0.21433	-0.19154	-0.17572	0.1719	0.16251	0.16755	0.16433	0.16435	-0.15468	0.15996	0.15762	0.15195	0.14902	0.16953	-0.1584	0.16046	-0.1594	-0.15985
		0.83262	0.63629	-0.4934	0.388	-0.34207	-0.28892	-0.26066	-0.24097	-0.22463	0.20272	0.21435	-0.19174	0.17616	-0.17195	-0.16313	0.16784	0.16435	0.16439	-0.15565	-0.16018	-0.15783	-0.15203	0.14906	-0.17008	0.15842	-0.16057	-0.15948	0.15987
		0.83266	0.63713	0.49344	-0.38821	0.3424	0.29035	-0.2608	-0.24131	0.22478	-0.20313	-0.21477	0.19213	0.17624	-0.17212	0.16392	0.16861	-0.16475	0.16441	-0.15637	0.16056	-0.15808	-0.15211	-0.14921	-0.1701	0.15855	-0.16065	-0.16015	0.16104
		0.83327	0.63746	0.49606	0.38845	0.34513	0.29048	-0.26115	-0.24155	0.22503	0.20338	0.21481	-0.19224	0.1767	0.17234	0.16397	0.16917	0.16482	0.16451	0.15651	0.16073	0.15809	0.15344	0.14928	0.17013	-0.15898	0.16134	0.16065	0.16105
		0.8336	0.63759	0.49653	-0.38879	0.34688	0.29193	0.26158	0.24158	0.22537	-0.2034	0.2154	-0.19228	0.17694	0.17306	0.16486	-0.16931	0.16503	-0.16474	-0.15666	0.16139	0.15891	-0.15349	-0.14934	0.17084	0.15918	0.16235	-0.16096	-0.16178
		0.83424	0.63844	0.49871	0.38888	0.34709	-0.29312	-0.2619	0.24166	-0.22559	0.20412	0.21558	-0.1926	0.17695	0.17359	0.16525	-0.16957	-0.16507	0.16491	0.15683	-0.16143	0.1603	0.15384	-0.14936	-0.17094	-0.15964	0.1627	-0.16102	0.1622
		0.83502	0.63944	-0.49993	-0.38962	-0.34723	0.29338	0.26212	0.24176	-0.22625	-0.20466	0.21567	0.19283	-0.17708	0.17364	-0.16538	0.16978	-0.16541	0.16507	-0.15767	-0.16147	0.1609	-0.15407	0.14943	0.17196	0.16021	0.16297	-0.16164	-0.16265
		0.83523	-0.64039	0.50012	0.38974	0.34779	0.2942	-0.26369	0.24181	0.22707	0.20515	0.21609	0.1933	-0.17731	0.17394	0.16543	0.17063	-0.16618	0.16588	-0.15787	-0.16211	-0.16139	-0.15447	0.14956	-0.17199	0.16078	0.16311	0.16183	-0.16303
		0.8356	0.64059	0.50059	-0.38975	0.34823	0.2949	-0.26373	0.24221	0.22722	0.20538	0.21616	-0.19385	-0.17933	-0.17397	-0.16546	0.1709	0.16623	-0.16627	0.15844	0.16233	-0.16168	0.15465	0.14956	0.17237	0.16103	0.16355	0.16217	-0.16328
		0.83781	0.64084	0.50086	0.39023	-0.34845	0.29568	0.26444	-0.2424	0.22731	0.2058	-0.21638	-0.19519	-0.18025	-0.17416	-0.16573	0.1712	0.16657	-0.16733	-0.15849	0.16268	-0.16178	0.15465	-0.14973	-0.17279	0.16109	-0.16362	-0.16219	0.16374
		0.83917	0.64131	-0.50158	0.39068	0.34862	0.2967	-0.26568	0.24275	-0.22751	0.20591	0.21655	-0.1953	0.18038	-0.17454	-0.1658	-0.17174	0.16694	-0.16745	0.15922	-0.16279	-0.162	-0.15478	0.14986	-0.17362	-0.1612	0.16392	0.16226	0.16404
		0.83977	0.64131	0.50193	-0.39074	-0.34887	0.29699	0.26641	-0.24289	-0.22776	0.20613	0.2166	0.19555	0.18117	-0.17473	-0.16585	-0.1722	0.16729	0.16754	-0.15939	-0.163	-0.16205	-0.15478	0.15005	-0.17496	0.16127	0.16417	0.16245	-0.1642
		0.84083	0.64144	-0.50234	0.39099	0.35039	0.2972	0.26832	0.24377	0.22778	-0.20613	0.21725	-0.19771	0.18128	-0.17486	-0.16623	-0.17294	-0.16784	-0.16769	0.15962	0.16415	0.16209	0.15481	-0.15066	0.17521	0.16132	-0.16438	0.16278	-0.16509
		0.84162	-0.64171	-0.50341	0.39133	0.35172	-0.29756	0.26851	0.24412	-0.22826	0.20732	0.21732	0.1985	0.18151	-0.17521	0.16654	-0.17329	0.16802	-0.16786	0.15977	0.1658	0.16212	0.15489	-0.15122	-0.17582	0.16222	0.16499	-0.16313	0.16602
		0.84228	0.64245	-0.5055	0.39145	0.35178	0.2976	0.27049	-0.24563	0.2284	-0.20741	0.21743	-0.19862	0.18175	-0.17537	0.16667	-0.17397	0.16809	0.16802	0.15997	-0.16606	-0.16254	0.15494	-0.1515	-0.17644	-0.16249	0.16552	-0.16378	0.1661
		0.84333	0.64358	0.50575	0.39178	-0.35208	0.29785	0.27049	0.24645	-0.22876	-0.20883	0.21755	-0.19883	-0.18176	0.1754	0.16707	-0.17421	-0.16853	-0.16828	-0.15997	-0.16644	-0.16287	0.15525	-0.15171	-0.17665	-0.16265	0.16596	0.16396	0.1663
		0.84364	0.6447	0.50739	0.39182	0.35224	0.29976	0.2709	0.24657	0.22959	0.20916	0.21774	0.19904	-0.18218	-0.17628	-0.16842	-0.17421	-0.16879	0.16835	0.16008	-0.1666	0.16295	-0.1554	-0.15244	0.17668	0.1627	0.16606	0.16444	0.16643
		0.84398	0.64531	0.50755	-0.39211	-0.35227	0.30029	-0.27229	-0.24665	0.22978	0.21002	0.21829	-0.19945	0.18231	-0.17628	-0.16853	-0.17452	0.16933	0.16853	-0.16051	0.16663	-0.16345	-0.15577	-0.15269	-0.17707	0.1627	0.16641	0.16578	0.16658
		0.84641	0.64594	-0.50782	-0.39246	-0.35234	-0.30032	-0.27267	-0.24704	-0.23033	-0.21055	-0.21885	0.19985	0.18234	-0.17629	0.16877	0.17458	-0.16936	-0.16879	-0.16064	-0.16664	0.16371	-0.15585	-0.15305	-0.17719	-0.1628	0.1674	0.16647	-0.1667
		0.84738	0.64655	0.50831	0.39266	0.35378	0.30122	0.27277	0.24757	0.23045	0.2121	0.21916	0.19992	0.18241	0.17658	0.16888	0.17465	0.16954	-0.16892	0.16072	-0.16677	0.16403	-0.15616	0.15314	-0.17843	-0.16309	-0.16769	-0.16651	0.1668
		0.84773	0.64886	0.50948	-0.39499	-0.35418	-0.30134	0.2735	0.24845	0.23231	-0.21212	-0.21922	0.20024	0.18242	-0.17665	0.16998	-0.17487	0.16999	-0.16943	-0.16088	-0.16681	0.16405	-0.15616	0.15338	0.17854	-0.16329	-0.16778	0.16658	0.16714
		0.84861	0.64892	0.51063	0.39618	-0.35498	-0.30172	-0.2743	0.24878	0.2329	-0.21271	-0.2193	0.20033	0.18246	-0.17665	0.17009	-0.17496	0.17016	-0.1696	-0.161	-0.16711	0.16411	0.15651	-0.15368	-0.17929	-0.16386	0.16803	-0.16687	-0.16796
		0.84882	0.64906	-0.51105	-0.39631	0.35546	-0.30282	0.27478	-0.24887	-0.2332	0.21609	-0.21983	0.20047	-0.18266	0.17732	0.17021	0.17565	0.17057	-0.17014	-0.16213	0.16817	-0.16411	0.15656	0.15378	-0.17967	0.16396	-0.1681	0.167	-0.16848
		0.84954	0.65012	0.51438	0.39732	0.35588	-0.30304	0.2753	0.24932	0.23344	0.21617	0.22024	0.20052	-0.1829	0.17732	0.17034	-0.17574	-0.17096	0.17033	-0.16216	0.16899	0.16446	-0.15697	0.15438	0.18053	0.16396	-0.16811	0.16708	0.16862
		0.84962	0.65152	-0.51534	-0.3978	-0.3561	-0.30365	-0.27531	0.24979	-0.234	0.21675	0.22037	-0.20108	0.18298	0.17765	-0.1704	0.17581	-0.17161	0.17046	-0.16245	-0.169	-0.16479	-0.15726	0.15458	0.18063	-0.16443	0.16839	-0.16726	-0.16867
		0.85001	0.6518	0.51563	-0.39852	0.35657	0.30409	0.27545	0.24993	-0.23458	0.21739	-0.22093	-0.20135	0.18341	-0.17795	-0.17059	-0.17602	0.17166	0.17064	-0.1625	-0.16907	0.16508	-0.15776	-0.15465	-0.18109	-0.16481	0.16845	-0.16742	-0.1688
		0.85044	0.6538	0.51689	0.39872	0.35739	0.30414	0.27648	-0.24996	-0.23523	0.21763	0.22156	0.20153	-0.18351	0.17834	0.17095	0.17622	-0.17172	-0.17084	-0.16266	0.16937	0.16525	0.15781	-0.15487	-0.18141	-0.16494	0.16862	-0.16751	0.16898
		0.85091	0.65413	0.51711	-0.39888	0.35744	-0.30468	-0.27674	-0.25013	0.23547	-0.21791	-0.22192	-0.20163	0.18385	-0.17836	-0.17103	0.17638	-0.17226	0.17098	0.16273	0.17015	0.16543	-0.15784	0.15521	0.18154	0.16579	0.16877	-0.16758	-0.16914
		0.85107	0.65521	0.51817	0.39944	0.35869	-0.30469	-0.27687	0.2503	-0.23584	0.21844	0.22219	0.20177	-0.184	0.17861	0.17106	0.17671	0.17239	0.17109	0.16281	0.17045	-0.16583	0.15807	0.15544	0.18191	0.16587	0.16919	0.16764	0.16927
		0.85261	0.65569	0.51828	-0.39958	0.35904	0.30567	0.27702	-0.25047	0.2362	-0.21851	-0.22321	0.20411	-0.18407	-0.17861	-0.17136	0.17731	-0.17318	-0.17134	0.16312	-0.17095	0.16598	0.15816	0.15551	-0.18198	-0.16609	-0.16948	0.16766	-0.16933
		0.85268	0.65598	-0.5191	0.40009	0.35916	0.30686	-0.27751	0.25144	0.23718	-0.21919	0.22345	-0.20417	0.18427	0.17866	0.17224	-0.17734	0.17333	-0.17146	-0.16336	0.17104	-0.16626	-0.15824	0.15588	0.18213	0.1678	0.17003	-0.16779	0.16955
		-0.85292	0.65637	0.51957	0.40039	0.36091	0.30753	-0.27813	0.25154	-0.23751	-0.2195	0.22398	-0.20462	0.18434	-0.17894	0.17327	-0.17738	0.17346	-0.17177	0.16341	-0.17121	-0.1665	0.15944	-0.15592	0.18276	-0.1688	-0.17062	-0.16927	0.16972
		0.85308	0.65678	0.51993	0.40047	-0.36116	-0.3077	0.27838	0.25199	-0.23815	-0.22006	0.22472	-0.20472	-0.18442	0.179	-0.1733	0.17766	0.17385	0.17272	-0.16346	-0.17166	0.16671	-0.1596	0.15601	-0.1832	-0.1696	-0.17088	0.16932	-0.16973
		0.85363	0.65809	0.52005	-0.40054	0.36143	-0.30784	-0.27897	-0.25286	0.23843	-0.22064	0.22533	-0.20491	-0.18443	0.17936	-0.17351	0.17792	0.17401	0.17294	0.16348	0.17203	0.16721	-0.15961	0.15654	-0.18339	0.16971	0.17111	0.16937	0.16996
		0.85374	0.65821	-0.52261	-0.40127	-0.36392	-0.30802	0.27921	0.25302	-0.23888	0.22082	-0.2256	-0.20548	-0.18452	-0.17989	-0.17433	0.17794	-0.17405	-0.17301	0.16365	0.17207	-0.16737	-0.16041	0.15703	-0.18347	-0.16975	-0.17165	-0.16995	0.17006
		0.85449	0.65953	-0.52263	0.4016	0.36442	-0.30807	0.27924	-0.25362	-0.23934	-0.22094	0.22568	-0.20561	0.18473	0.18052	0.17467	-0.17794	-0.17409	-0.1735	0.16386	0.17224	0.16768	0.16064	-0.15713	-0.18356	-0.16976	-0.17223	-0.17001	-0.17016
		0.85568	0.66016	0.52389	0.40231	0.36492	0.3086	0.27984	-0.25364	0.24005	-0.22119	0.22591	-0.20569	0.1848	-0.18083	-0.17514	0.17795	-0.1746	-0.17369	-0.16406	0.17253	-0.1683	0.16142	0.15721	-0.18368	0.17011	0.17231	-0.17066	0.17095
		0.85661	0.66033	0.5246	-0.40231	0.3656	0.30909	0.28021	0.25366	-0.24033	0.22129	-0.22616	0.20594	0.18533	-0.1812	0.17571	-0.17812	0.17473	0.175	0.1641	-0.17276	-0.16865	-0.16173	-0.15732	0.1839	0.17017	-0.1726	0.17069	-0.17109
		0.85675	0.66056	0.52487	0.40316	-0.36623	-0.30942	-0.28083	-0.25367	0.24081	-0.2213	0.22652	-0.2062	-0.18534	-0.18129	0.17575	-0.17843	0.17498	-0.17535	0.16412	-0.1729	-0.16874	-0.16187	-0.15733	-0.18419	0.17024	-0.17266	0.17122	-0.17109
		0.85751	0.6608	0.52584	-0.40381	0.36638	-0.3099	0.28095	-0.25453	-0.24085	-0.22172	-0.22704	0.20659	-0.18547	0.18222	-0.17639	0.1786	0.17605	0.17536	-0.16432	-0.17298	0.1688	-0.16231	-0.15748	-0.18488	-0.17053	0.17285	0.17125	-0.17141
		0.85775	0.661	-0.52613	0.40451	-0.36667	-0.31061	-0.28099	0.25466	0.24119	-0.22243	0.22762	0.20677	0.18563	-0.18233	0.17727	0.1786	-0.17612	-0.1754	-0.16434	-0.17323	-0.16934	-0.16233	-0.15786	-0.18488	0.17096	-0.17308	-0.17197	0.17144
		0.85997	0.6616	0.52722	0.40565	0.36694	0.31183	-0.28108	0.25523	-0.24155	0.22254	-0.22794	-0.20753	-0.186	-0.1824	0.17749	0.17861	-0.17643	0.17632	0.16454	-0.17324	-0.16945	0.16259	0.15798	-0.18497	0.17141	0.17313	0.17202	-0.17146
		0.86062	0.66188	0.52763	-0.40588	-0.36857	-0.3131	0.28148	-0.25627	0.24292	0.22341	0.22795	-0.20768	-0.18611	0.18307	0.17789	0.17891	0.17655	0.17694	0.16465	-0.17326	-0.16974	0.16269	0.15804	0.18501	-0.17158	0.17321	-0.17202	-0.1725
		0.86099	0.66383	0.52795	-0.40653	-0.36896	-0.3134	-0.28156	0.25659	0.24417	0.22362	0.228	0.20776	0.18646	-0.18328	-0.17792	0.17918	0.17667	-0.17723	-0.16511	-0.17327	-0.16985	-0.16351	-0.15838	0.18527	0.17161	0.17361	-0.17286	-0.17297
		0.86118	0.66391	0.52964	0.40661	-0.37219	-0.31458	0.28177	0.25768	-0.24478	-0.22393	-0.22865	-0.20788	-0.18661	0.18349	-0.17795	-0.17923	-0.17693	-0.17741	0.16612	-0.17383	-0.17026	0.16373	-0.15839	0.18528	0.17202	0.17384	0.17291	-0.17303
		0.86281	0.66599	0.53017	-0.40699	-0.37264	-0.31513	-0.28186	-0.25827	0.24539	0.22403	-0.2293	0.20816	-0.18741	-0.18352	-0.17796	-0.17968	-0.17726	-0.17809	-0.16629	-0.17396	-0.17031	0.16391	0.15861	0.18535	0.17209	0.17435	-0.17309	-0.17308
		0.86426	0.66622	0.53062	-0.40718	0.3727	0.31587	-0.2824	-0.25913	0.24559	0.22449	-0.22958	0.20842	-0.1875	-0.18366	0.17857	-0.18001	0.17746	-0.1787	-0.16675	0.17436	-0.17035	-0.16392	-0.15891	-0.18536	-0.17277	-0.17458	0.1732	-0.17336
		0.86627	0.66637	0.53388	0.40725	-0.37408	0.31607	-0.28367	-0.25987	-0.24572	-0.22518	0.22963	0.20898	-0.1875	-0.18384	0.17871	-0.18024	0.17749	-0.17919	-0.16676	0.17469	-0.17055	0.16403	0.15918	-0.1855	-0.17297	0.17461	-0.17372	0.17345
		0.86756	0.66736	0.53453	0.4077	0.3744	0.31617	0.28512	-0.26006	0.24587	0.22557	0.23016	-0.20938	0.18765	0.18473	0.17891	0.18038	0.17762	-0.17949	0.16679	-0.17489	0.17093	0.16453	0.15971	-0.18551	-0.17351	0.17469	0.17384	-0.17363
		0.86804	0.66948	0.53619	0.40799	-0.37492	-0.31637	0.286	-0.26024	0.24649	-0.2261	-0.23052	-0.20951	0.18787	0.18534	-0.17899	0.1804	-0.17765	0.17955	0.1673	0.17544	-0.17098	0.16461	-0.16007	-0.18557	-0.17389	0.17501	0.1741	-0.17451
		0.86833	0.66964	0.53673	-0.40806	0.37531	-0.31646	0.28707	0.26044	-0.24697	0.22612	0.23125	-0.20956	0.18866	-0.18548	0.17911	-0.18074	0.17834	0.1801	-0.16765	-0.17545	0.17145	0.16474	-0.16007	-0.18558	-0.17395	0.17606	-0.1742	0.17492
		0.86855	-0.66969	0.53725	0.4082	0.37571	-0.3166	-0.28725	0.26141	-0.24703	0.22621	-0.23137	0.20998	0.18929	0.18565	0.17953	-0.18119	-0.17917	0.18011	0.16799	-0.1755	-0.17169	-0.16499	-0.16014	0.18562	-0.17485	0.17607	-0.17427	-0.17523
		0.86928	0.66991	-0.53777	0.40831	-0.37717	0.31684	-0.28734	0.26153	-0.24724	-0.22626	0.23146	-0.21009	0.1895	-0.18581	0.18016	-0.18133	0.17961	-0.18012	-0.16859	-0.17597	0.17192	-0.165	-0.16112	-0.18603	-0.17505	0.17617	-0.17529	-0.17573
		0.86935	0.67041	0.53868	0.40953	-0.37719	-0.31721	-0.28739	0.26254	0.24725	-0.22694	-0.23218	-0.2102	0.18956	0.18598	0.18026	-0.18151	0.17977	0.18067	-0.16867	-0.1763	-0.17255	0.16502	-0.16125	0.18618	-0.17546	-0.17717	-0.1754	0.17613
		0.86954	0.67146	0.53872	0.40969	0.37761	0.31754	0.29012	-0.26385	0.24758	0.22779	0.23228	-0.21034	-0.19036	0.18599	-0.1803	-0.18193	0.18032	0.1807	-0.16926	0.17727	0.17274	-0.16511	0.16187	0.18681	0.17635	0.1775	0.17553	-0.17647
		0.8715	0.67153	0.5396	0.41009	0.37844	-0.31787	0.29038	0.26428	0.24778	-0.22798	-0.23242	-0.2105	0.1916	-0.18622	-0.18033	0.18198	-0.18098	0.18081	0.16949	0.1777	0.1735	0.16532	0.16203	0.18694	0.17641	-0.1775	-0.17576	-0.17729
		0.87189	0.67274	0.53963	0.41247	-0.3818	0.31937	-0.29143	-0.26439	-0.24884	-0.22798	-0.23315	0.21078	0.19167	-0.18622	0.18053	0.18254	0.18105	-0.18091	0.16965	0.17788	-0.17368	-0.16638	0.16209	0.18697	-0.17674	-0.17804	0.17594	-0.17742
		0.87201	0.67828	0.53964	0.41286	0.38222	0.32065	0.29183	0.26467	-0.24897	0.22814	0.23395	0.21079	-0.1918	0.1866	-0.18088	0.18269	-0.18113	0.1815	0.17032	0.1779	0.1738	0.16682	0.16217	0.18738	0.17701	0.17826	0.17667	0.17784
		0.87223	0.67917	0.5404	0.41325	0.38239	0.32123	0.29188	0.26583	-0.24923	0.22851	0.23404	-0.21186	-0.19215	0.18673	-0.18154	-0.18281	0.18114	-0.18214	-0.1704	0.17825	-0.17423	0.16702	0.16243	0.1875	0.17704	-0.17869	-0.17694	-0.1779
		0.87245	0.68003	0.54182	0.41346	0.38358	0.32181	0.29204	0.2665	0.24928	0.22861	0.23506	0.21194	0.19235	0.18689	-0.18306	0.18286	0.18132	0.18277	-0.17075	0.179	0.17451	0.16722	0.16297	0.18821	-0.17729	-0.17893	0.17697	0.17828
		0.87339	0.68078	-0.54217	0.41455	0.38439	0.32191	0.29231	0.26707	-0.24966	-0.22878	-0.23533	0.21205	0.19236	0.18773	0.18308	-0.18295	0.18138	-0.18277	0.17118	0.17954	0.1759	0.16752	-0.16335	0.18836	0.17733	-0.17907	0.17742	0.17837
		0.87418	0.68251	0.54219	0.41507	0.38469	0.32251	0.29244	0.26735	0.25042	0.22888	0.23611	-0.21213	-0.19297	0.18842	-0.18309	-0.18302	0.18185	-0.18441	0.17141	0.17999	0.17634	0.16896	0.16336	0.18844	0.17738	0.17921	0.17756	0.179
		0.87491	0.68256	0.54319	-0.41515	0.38567	0.32279	0.29255	0.2676	0.25142	-0.22924	0.23622	0.21282	-0.19323	0.18857	0.18325	-0.18318	-0.18207	0.18471	-0.17143	0.18003	-0.17667	0.16934	-0.16338	0.18851	-0.17745	0.17969	-0.17763	0.17911
		0.87492	0.68363	-0.54329	-0.41593	-0.38586	0.32335	0.29263	0.2683	0.25193	-0.22989	-0.23656	-0.21337	-0.19413	-0.18941	0.18407	-0.18337	-0.18213	0.18497	0.17148	-0.18014	-0.17741	0.16937	0.16345	0.18884	-0.17751	0.17976	-0.17813	0.17919
		0.87505	0.68513	0.54438	0.41811	0.38688	-0.32361	0.293	-0.26957	-0.25202	0.23021	-0.23892	-0.21382	0.19483	-0.18948	-0.18419	0.18352	0.1822	0.18532	0.17151	-0.18014	0.17843	0.17028	-0.16373	0.18899	0.17794	-0.17991	0.17843	0.17929
		0.87572	0.6859	0.54529	-0.41878	-0.38802	-0.32379	0.2941	-0.26985	-0.25238	-0.23033	-0.23937	-0.21384	0.19579	-0.18969	-0.18436	-0.18488	-0.1826	-0.18619	0.17154	-0.18048	0.17856	0.17061	-0.16374	0.18914	-0.17795	0.18004	0.17922	-0.17938
		0.87877	0.68745	-0.54552	0.41954	0.38835	0.32473	-0.29514	0.26999	0.25239	-0.23112	-0.23953	-0.21394	-0.19604	0.19007	0.18489	-0.1849	0.18265	-0.18631	0.17226	-0.18125	-0.17916	0.17083	-0.16416	-0.18923	-0.17811	-0.18012	-0.17936	0.17953
		0.87901	-0.68748	0.54561	0.41974	0.38895	0.32548	0.29587	0.27055	-0.25242	0.23153	-0.23961	-0.21397	-0.19607	-0.19062	0.18539	0.18496	0.18275	-0.18637	0.17262	0.18126	0.17928	0.17086	-0.16417	-0.18946	0.17898	0.18179	-0.17984	0.17966
		0.87991	0.68775	-0.54706	-0.42097	0.38933	0.3255	0.29629	0.2707	-0.25384	0.23185	0.23969	-0.21476	-0.19609	-0.19097	-0.1855	-0.18506	-0.18382	-0.18659	0.17356	0.18134	0.17942	0.17105	-0.16484	0.18948	-0.17945	0.18229	0.18001	-0.1799
		0.88224	0.68818	0.54803	-0.42175	0.39017	0.3267	-0.29703	0.27183	-0.25418	0.23237	0.23992	0.21492	-0.19618	-0.19139	-0.18561	-0.18523	0.1839	0.18738	0.17389	0.18146	0.17944	0.17109	-0.16573	-0.18949	0.17962	-0.18266	0.18065	-0.18044
		0.88316	0.68854	0.54905	-0.42216	0.39029	-0.32681	-0.29716	-0.27232	-0.25477	-0.23254	-0.24078	-0.21498	0.19674	0.19171	-0.18564	0.18555	0.18404	0.18739	0.17402	-0.18271	0.17998	-0.1711	-0.1663	0.18968	0.17995	-0.18304	-0.18103	-0.18071
		0.88516	0.69063	0.54998	0.42318	0.3907	0.32752	0.29753	0.2724	-0.2553	0.23296	-0.24095	0.21524	0.19674	-0.19212	0.18572	-0.1871	-0.18438	-0.1877	-0.17426	-0.18278	-0.18059	-0.17187	0.16647	-0.19026	-0.18028	-0.1833	0.18125	0.18102
		0.88673	0.69104	0.5513	-0.42319	-0.39077	0.32874	0.2979	0.27256	-0.25558	-0.23378	0.24165	0.21532	0.19675	-0.19237	0.18587	-0.18829	0.18439	0.18801	0.17486	-0.18346	0.18087	-0.17258	-0.1665	0.19028	0.18056	-0.18341	-0.18139	0.18119
		0.88753	0.69113	0.55182	0.42368	-0.39102	0.33007	0.30076	0.2728	0.25559	-0.23391	0.24174	0.21536	0.19677	0.19257	0.18633	0.18833	-0.18463	-0.18906	-0.17487	-0.18406	0.18126	0.17278	-0.16655	0.19033	-0.18089	0.18376	0.18228	0.18132
		0.88763	0.69228	0.55229	-0.42684	0.39193	-0.33026	-0.30133	-0.27299	0.25612	0.23435	0.24187	0.21546	-0.19677	-0.19312	0.18645	0.18907	-0.18542	-0.18928	0.17496	-0.18407	0.18126	0.1729	0.16669	-0.19053	0.18099	-0.18402	0.18242	0.18135
		0.88796	0.69248	-0.55336	-0.42837	-0.39193	-0.33061	-0.3017	0.27348	-0.25655	0.2344	0.24261	0.21566	-0.19775	-0.19344	-0.18669	-0.18933	-0.18593	0.18959	-0.17516	0.18412	0.18127	-0.17297	-0.16689	-0.19061	0.18128	0.18492	0.1833	0.18148
		0.88882	0.694	0.55362	-0.42849	0.39236	-0.33165	0.30184	0.27384	0.25706	0.23472	-0.24293	-0.21592	-0.19784	0.19351	0.18676	-0.18947	-0.18616	0.19029	-0.17527	-0.18428	0.18152	-0.1734	-0.16694	-0.19175	-0.1814	0.18519	0.18347	-0.18177
		0.88934	0.6952	-0.5537	-0.42953	0.39237	0.33192	0.30203	-0.27416	0.25807	0.23472	0.24319	0.21698	0.19805	0.19355	0.18676	0.18966	-0.18637	-0.19044	0.1754	0.1845	-0.18171	0.17348	-0.16703	0.19212	-0.18173	-0.1853	0.18363	-0.18177
		0.88981	0.69534	0.55402	0.42962	0.39246	0.3321	0.30252	0.27418	-0.25812	0.23495	-0.24326	-0.21698	0.19814	0.19396	-0.18756	-0.18998	0.18704	-0.19066	-0.17614	-0.18456	-0.18173	0.17402	0.16706	-0.19232	0.18309	-0.18652	-0.18369	0.18178
		0.88996	0.69798	-0.55465	-0.43108	0.39271	-0.33355	0.30268	0.2744	0.25819	0.23525	-0.24353	-0.21776	0.19825	0.19408	0.18771	-0.1901	-0.18716	-0.19111	0.1762	-0.18477	0.1823	0.17404	-0.16726	-0.1926	-0.18322	-0.18729	0.18453	-0.18182
		0.89137	0.69809	-0.55851	0.43188	-0.39324	0.33406	0.30295	-0.27455	-0.25831	-0.23554	0.24361	-0.21804	0.19881	-0.19423	0.18785	0.19011	-0.18726	-0.19138	-0.17637	-0.18532	-0.18269	-0.17426	-0.16734	-0.19278	0.18329	-0.18739	-0.18458	-0.18185
		0.89203	0.69869	0.55995	0.43267	0.39365	0.33481	0.30601	0.275	0.25838	0.23563	0.2438	0.21819	-0.19908	-0.19432	0.18842	0.19029	0.18745	-0.19174	0.1765	-0.18555	0.18315	-0.17439	-0.16751	0.1928	-0.18342	0.18824	0.18547	0.18219
		0.89246	0.699	0.55996	0.433	0.39426	0.33584	-0.30624	-0.27514	-0.25883	-0.23568	0.24401	-0.21868	0.19917	0.19461	-0.18895	0.19055	-0.18765	0.19189	0.17661	0.18575	-0.18322	-0.17521	0.16777	-0.19283	0.18357	-0.18829	0.18605	0.18227
		0.89262	0.69906	0.56033	-0.43341	0.39454	0.33601	0.30661	-0.2761	0.26015	0.23602	-0.24405	0.21955	0.19926	-0.19497	-0.18957	0.19074	0.1878	0.1919	0.17694	0.18602	0.18339	0.17534	-0.16795	-0.19346	-0.18411	-0.18854	-0.18607	-0.18228
		0.89317	0.7	0.5612	0.43364	0.39524	0.33721	-0.30697	0.27653	0.26114	-0.23672	-0.24428	-0.22011	-0.20043	-0.19516	-0.18958	-0.19093	-0.18817	0.19198	0.17753	0.18677	0.18346	0.17535	-0.16808	-0.19355	-0.18416	-0.18871	0.18646	0.18262
		0.89424	0.70093	0.56336	-0.43408	0.39535	0.33758	0.30714	-0.27686	0.26136	-0.23686	-0.24436	0.22065	-0.20056	0.1953	0.18959	-0.19102	-0.18864	0.19199	0.17782	0.18724	0.18378	-0.17546	-0.16847	-0.19468	-0.18438	0.18892	0.18663	0.18305
		0.8943	0.70192	0.56364	0.43706	-0.39549	0.33777	0.3073	0.27721	0.26144	-0.23757	0.24502	0.22102	0.20076	-0.19546	-0.19003	-0.19137	-0.18866	-0.19207	-0.17785	0.1882	0.18432	-0.17573	-0.1685	0.1953	0.18448	-0.18935	-0.18669	-0.1832
		0.89439	0.70236	0.56393	0.44031	-0.396	0.33918	0.30745	0.27728	-0.2619	0.23775	-0.24598	0.22168	-0.20144	0.19571	-0.19117	-0.19159	0.1888	0.19222	-0.17788	0.18822	-0.18441	0.17578	-0.16864	-0.1955	0.18454	0.18978	0.18672	-0.18362
		0.89498	0.7031	0.56408	0.44115	-0.39616	0.33934	0.3077	0.27736	-0.26191	-0.23799	-0.24635	-0.22177	-0.20209	-0.19605	-0.19154	-0.19188	-0.18905	-0.19257	0.17834	-0.18822	0.18489	-0.17603	0.16932	-0.19573	-0.18454	-0.19059	-0.18712	0.1839
		0.89535	0.70452	0.56419	-0.44183	0.39645	-0.33986	0.3077	-0.27757	0.26204	0.2383	-0.24648	0.22286	0.20256	-0.19642	-0.19262	0.19213	0.18917	-0.19338	-0.17883	0.1884	-0.18507	-0.17609	-0.16951	-0.19579	0.1846	-0.19085	-0.18736	-0.18397
		0.8959	0.70596	0.56471	0.44255	0.39684	0.34093	0.30844	0.2778	-0.2625	0.23882	0.24669	0.22432	-0.20417	-0.19661	-0.19312	0.19229	0.18955	-0.19344	-0.1794	-0.18875	0.18569	0.17647	-0.16962	0.19591	0.18493	-0.19101	0.18786	0.18404
		0.89621	0.70685	0.56612	0.44314	0.39816	0.34129	-0.30874	-0.27794	0.26275	0.23896	0.24687	-0.22444	-0.2048	0.19665	-0.19312	-0.19259	-0.18999	0.19357	-0.17965	-0.18893	-0.1857	-0.17656	0.16972	-0.19592	0.18523	-0.19126	0.1879	0.18406
		0.89668	0.70814	-0.56638	-0.44393	0.39872	-0.34172	-0.30911	-0.27823	-0.26342	-0.23896	0.24698	-0.22525	0.20503	0.197	-0.19314	-0.19288	0.19062	-0.19358	-0.17983	0.18908	0.18616	0.17669	-0.16977	0.19634	-0.18578	0.19144	-0.18849	-0.18431
		0.89678	0.70999	-0.56674	0.44695	-0.39911	0.34176	0.30972	-0.27839	0.26402	-0.23896	0.24737	0.2256	-0.20568	0.19704	0.19337	-0.19372	0.19072	0.19444	-0.17984	0.18915	-0.18634	0.17683	-0.16982	-0.19635	-0.18638	0.19189	-0.18871	0.18467
		0.89857	0.71082	0.5682	0.44735	0.39992	0.34294	0.30987	-0.27876	-0.26429	0.23927	0.24786	-0.22573	0.20583	-0.1971	-0.19365	0.19413	0.19119	-0.19467	-0.18018	0.19036	-0.18701	0.17713	-0.16983	0.19688	0.18698	0.19221	-0.18873	-0.18492
		0.89918	0.71099	-0.56847	-0.44795	-0.40006	0.34382	-0.31128	0.28002	0.2646	0.23953	0.24819	-0.22615	-0.2062	-0.19779	-0.19367	-0.19415	0.19144	-0.19494	-0.18069	-0.19074	-0.18735	-0.17718	-0.17021	0.19699	-0.18757	-0.19237	0.189	0.18536
		0.90041	0.71349	0.56851	0.44885	-0.40023	0.34481	0.31157	0.28021	-0.26529	-0.24008	0.24906	0.22705	0.20672	-0.19802	-0.19405	-0.19422	-0.19202	0.19516	-0.1808	0.1908	-0.18748	0.17736	0.17036	0.19721	0.18834	-0.19245	-0.18901	0.18539
		0.90126	0.71383	0.57017	0.45008	-0.40034	-0.34583	-0.3116	-0.28152	0.26624	0.24012	0.24906	0.22763	0.20728	0.19843	0.19414	0.19424	-0.19215	0.19532	0.18173	0.19106	-0.18765	0.17803	-0.17049	-0.19744	-0.18845	0.19389	-0.18906	-0.18559
		0.90226	0.71405	0.57031	0.45037	0.40093	0.34627	0.31223	-0.28374	0.26681	-0.2418	-0.24968	0.22805	-0.20731	0.19903	0.19426	0.19426	0.19216	-0.196	-0.18196	0.19121	0.18782	-0.17841	-0.17053	-0.19758	0.18857	-0.19417	0.18919	0.18564
		0.90324	0.71442	0.57157	0.45037	0.40096	-0.34664	-0.3123	-0.28397	-0.26764	-0.24181	0.2498	0.22816	-0.20746	0.1991	-0.19435	0.19529	0.19234	0.19651	-0.18197	-0.19178	0.18806	-0.17915	-0.1711	0.19765	-0.18905	0.19425	0.18922	-0.18573
		0.90362	0.71482	-0.57323	-0.45174	0.40259	0.34691	-0.3124	0.28425	0.26772	-0.24287	0.25014	-0.22852	0.20756	0.19914	-0.19459	0.19541	-0.19241	-0.19712	0.18213	-0.19231	-0.18831	-0.17976	0.17133	-0.198	0.18916	-0.19456	0.18948	-0.18578
		0.90429	0.71501	0.57326	-0.45414	-0.40264	-0.34821	0.31306	0.28506	0.26777	-0.24358	-0.25033	-0.22856	0.20774	0.19968	-0.19476	0.19554	0.19244	0.19761	0.1823	-0.1927	-0.18845	-0.17995	0.17141	0.19806	-0.19018	-0.19532	-0.1899	0.18596
		0.90504	0.71623	0.57408	0.45428	-0.40391	0.34863	0.31358	0.28568	-0.26807	-0.2442	-0.25118	0.22858	-0.208	-0.1998	0.19489	-0.19557	-0.19246	-0.19792	-0.18246	0.19295	0.1887	0.18049	-0.17147	-0.1987	0.1903	-0.19569	0.19007	-0.18621
		0.90544	0.71838	-0.57495	0.45457	0.40409	0.34864	0.31439	0.2861	0.26828	-0.2444	-0.25125	0.22865	-0.20802	-0.20046	0.19506	-0.19608	0.19253	0.19819	0.18254	0.19297	0.18918	-0.18069	-0.17184	0.19902	-0.1905	0.19588	-0.1902	-0.18643
		0.90576	0.71871	0.57496	-0.45494	-0.40436	0.34895	-0.31518	0.28642	-0.2683	0.24467	-0.25134	0.22894	-0.20805	-0.20063	-0.19517	-0.19623	0.19371	-0.19913	-0.18261	0.19304	-0.18929	-0.18081	0.17232	0.19907	0.19053	-0.19596	0.19046	0.18653
		0.90587	0.71919	-0.57616	0.45559	0.4044	0.34919	0.31559	-0.28679	-0.26858	0.24494	0.2516	-0.22946	0.20813	0.20083	-0.19543	0.19684	0.19413	-0.19941	-0.18267	-0.19306	-0.18935	0.18089	-0.17285	0.1999	0.19065	-0.19632	0.19073	-0.18688
		0.9059	0.71976	0.57631	0.45578	0.4047	0.34952	-0.31572	-0.28683	0.26869	-0.24534	-0.25162	-0.22963	-0.20982	0.201	0.19721	0.19685	0.19491	-0.19962	0.18302	0.19357	0.18948	0.1819	-0.17317	0.20004	-0.19067	0.19641	0.19082	-0.18689
		0.90662	0.71979	-0.57761	0.45651	-0.40486	0.35012	0.31592	0.28697	0.26925	-0.24536	0.25163	0.22972	0.21034	0.20102	0.19732	-0.19711	-0.19515	0.20014	-0.18327	0.19402	-0.18992	-0.18194	-0.1734	0.20036	0.19091	-0.19668	-0.19093	-0.18726
		0.90689	0.72073	0.57763	-0.45673	0.40532	-0.35091	0.3166	0.28704	-0.26966	0.2458	0.25188	-0.23004	0.21036	0.20126	0.19746	-0.19746	-0.19517	0.20045	0.18332	-0.19404	-0.19029	-0.18197	0.174	0.20045	-0.19138	0.19679	0.19122	0.18764
		0.91152	0.72212	0.57977	0.45682	-0.4055	0.35163	-0.31677	-0.28803	0.27026	0.24582	0.2521	0.23067	0.21043	0.20128	-0.19757	0.19758	0.19552	-0.20053	0.18339	-0.19428	-0.19103	-0.18205	0.17411	0.20055	0.19151	-0.19713	-0.19124	-0.18784
		0.91208	0.72256	0.58343	0.45777	0.40592	-0.3517	-0.31678	0.28828	0.2703	-0.24693	0.2524	0.23177	0.21113	0.20135	0.19761	0.19772	-0.19579	-0.20104	-0.18355	-0.19465	0.19112	-0.18209	-0.17417	0.20095	0.19154	-0.19714	-0.19157	-0.18795
		0.91387	0.72581	0.58392	-0.45803	0.40693	-0.35232	0.31718	-0.28924	0.27041	-0.24713	0.25299	0.23249	-0.21159	-0.20198	0.19762	0.19778	-0.19608	0.20123	0.18359	-0.19468	-0.19214	-0.18234	0.17443	0.20143	0.19166	-0.19776	-0.19198	0.18822
		0.91392	0.72931	0.58475	0.4585	0.40725	0.3527	-0.3174	0.28975	-0.27062	0.24718	0.25349	0.23266	0.21196	-0.20226	0.19793	-0.19804	-0.19617	0.20201	-0.18363	-0.19479	-0.19258	-0.1831	0.17445	0.2017	0.19188	0.1978	0.19208	0.18833
		0.91416	0.72979	0.58734	-0.4606	0.40731	-0.35276	-0.31773	-0.28984	0.2723	-0.24718	0.25355	-0.23268	0.21213	-0.20247	0.19796	0.19847	-0.19623	0.20201	-0.18398	-0.19506	-0.19261	-0.18402	0.17468	-0.20182	0.1927	-0.19813	0.1922	0.18876
		0.91674	0.73	0.5874	0.46208	0.40732	0.35314	-0.31867	-0.29031	0.27234	-0.24764	0.25385	-0.23269	0.21249	-0.20298	-0.19903	-0.1986	0.19698	-0.20263	0.18417	0.19512	-0.19303	0.18454	-0.17529	-0.202	0.19287	-0.19862	0.19231	0.18939
		-0.91736	0.73013	-0.58805	0.46289	0.40797	0.35338	0.31892	-0.29046	0.27276	0.24794	-0.25422	0.2332	-0.21252	-0.20317	0.20016	0.19862	-0.19698	0.20281	-0.18433	-0.19562	-0.19335	-0.18461	0.17545	-0.20266	-0.19334	0.19934	0.19237	0.18965
		0.91792	0.73147	0.58848	-0.46289	0.40982	-0.35407	-0.3194	0.292	0.27329	0.24817	-0.25452	-0.23322	0.21398	0.2036	-0.20034	0.19898	-0.19721	-0.20319	-0.18453	0.19593	-0.19337	-0.18513	0.17557	-0.2027	-0.19334	-0.1998	-0.19247	-0.18989
		0.91836	0.73148	0.58855	0.46444	-0.41011	0.35557	0.32042	-0.2922	0.2733	0.24839	-0.25453	0.23356	0.21456	-0.20412	0.20059	-0.199	-0.19735	-0.20322	-0.18491	0.19596	0.19348	0.18534	0.17574	0.20286	0.1934	-0.20016	0.19266	0.1904
		0.91868	0.73359	0.58919	0.46449	-0.4119	0.35593	0.32116	0.2936	0.27349	0.24875	0.25466	0.23438	-0.21461	-0.20426	-0.20073	0.19932	0.19737	-0.20341	0.18544	-0.19598	0.19354	-0.18575	-0.17608	0.20292	0.19422	-0.20025	-0.19271	-0.19059
		0.91894	0.73518	0.59206	-0.46464	-0.41284	-0.35687	-0.32279	0.29437	0.27368	0.249	0.25582	-0.23441	-0.21492	-0.20463	-0.20142	-0.2006	0.19783	-0.20353	-0.18545	0.19625	0.19399	0.18597	-0.17626	-0.20366	0.19482	-0.20102	0.193	-0.19074
		0.91978	0.73903	0.5926	0.46543	-0.41299	-0.35698	0.32317	0.29464	0.27376	0.24958	0.256	-0.23456	-0.21515	0.20484	-0.20145	-0.20091	0.19813	0.20372	-0.18551	0.1965	-0.19421	0.18671	0.17701	0.20402	-0.19496	-0.20121	-0.19311	0.19076
		0.91989	0.7403	0.59328	0.46544	0.4141	0.35736	-0.32388	0.29474	-0.27397	0.25012	-0.25603	0.23459	-0.21525	0.20529	-0.20161	0.20107	0.19823	0.20388	-0.18598	-0.19718	0.19476	0.187	-0.17714	-0.20413	-0.19506	0.20157	-0.1932	-0.19092
		0.9201	0.74035	0.59362	-0.46641	0.41412	0.35745	0.32432	-0.29514	0.27401	-0.25014	-0.25637	-0.23544	0.21543	-0.20529	-0.20183	0.20111	0.19824	-0.20474	-0.18605	0.19734	0.19478	0.18759	-0.17738	-0.20446	0.19514	0.20171	0.19332	0.19097
		0.92133	0.74167	0.59464	0.46656	0.41463	-0.35775	-0.32442	-0.29539	0.27678	-0.25047	-0.25645	-0.23547	0.21551	-0.20541	-0.20205	-0.20238	-0.19983	0.20505	0.18656	0.19747	0.19508	-0.18781	-0.17754	-0.20509	-0.19541	0.20236	-0.19347	-0.1911
		0.92192	0.74178	0.59503	0.46661	-0.4149	0.35781	-0.32442	-0.29568	-0.27682	0.25065	-0.25655	-0.23556	0.21584	-0.20588	-0.2026	-0.2034	-0.20032	-0.20583	-0.18699	0.19749	0.19535	0.18797	0.17792	-0.2054	-0.19584	-0.20252	-0.19355	0.19133
		0.92256	0.74267	-0.59764	-0.46747	-0.41606	-0.35797	0.32465	-0.29594	-0.27684	0.25106	0.25669	0.23609	-0.21595	-0.20642	-0.20268	0.20425	-0.20055	0.20596	0.18729	0.19787	-0.1966	0.18803	-0.17859	0.20541	-0.19612	0.20272	0.19371	-0.19229
		0.92378	0.74488	0.59799	-0.46839	-0.41742	-0.35996	-0.3247	0.29606	0.27853	-0.25154	0.25822	0.23624	-0.21641	-0.20653	0.20305	0.2044	0.201	0.20635	0.18748	0.19787	-0.19698	-0.18805	0.17864	-0.2056	-0.19614	-0.2028	0.19415	0.19279
		0.92396	-0.74556	0.59943	0.46942	0.41863	-0.36152	0.32499	0.29612	0.27858	-0.25178	-0.25829	0.23635	-0.21697	0.20656	0.20317	0.20473	-0.20122	-0.20636	0.18752	-0.19787	-0.19701	-0.18854	-0.17908	-0.20595	0.19617	0.20281	-0.1949	-0.19287
		0.92459	0.74603	0.59956	-0.46979	0.42046	0.3623	0.32657	0.29619	0.27902	0.25249	-0.25852	-0.23669	0.21699	0.20757	-0.2033	-0.20485	0.20142	0.20661	0.18756	-0.19844	-0.19726	0.18892	0.17933	0.2062	0.19621	-0.20328	-0.19569	0.19349
		0.92542	0.7465	-0.60036	0.47115	-0.42173	-0.36238	-0.32659	0.29622	0.27912	-0.25285	0.25907	0.237	-0.21709	-0.20813	0.20332	-0.20501	-0.20148	0.20706	-0.1876	-0.19913	0.19757	-0.18892	0.17941	0.20637	-0.19704	-0.2033	0.19572	0.19379
		0.92846	0.74981	-0.60265	0.47139	0.4224	0.36303	0.32707	-0.29653	-0.28003	0.25287	0.25974	0.2372	0.21724	-0.20859	0.2035	0.20518	-0.20152	0.20755	-0.18832	-0.19957	0.19764	0.18938	0.17955	-0.20693	-0.19733	0.2035	0.19661	-0.19403
		0.92991	0.75031	0.60316	0.47218	0.42346	0.36321	0.32772	-0.29683	0.28165	0.25396	-0.25979	0.23744	0.21727	0.2086	-0.20392	-0.20535	0.20187	0.20767	0.18887	0.19969	-0.19783	0.18939	0.17977	0.20721	0.198	-0.20435	-0.1967	-0.19407
		0.93012	0.75038	0.60341	0.47267	-0.42474	0.36324	0.32876	0.29697	-0.28177	-0.25436	0.25983	-0.23767	0.21749	-0.2088	0.2042	0.20541	0.20194	-0.2092	-0.18954	0.1998	-0.19802	0.1895	0.18023	-0.20762	0.19811	0.20449	0.19681	0.19433
		0.93151	0.7514	-0.60453	0.47389	0.42582	0.36445	-0.3288	0.29748	0.28227	-0.25455	-0.26068	0.2378	0.21777	-0.20947	0.2048	-0.2058	-0.20333	-0.20943	-0.18984	-0.2001	-0.19805	-0.18973	0.18043	0.2077	-0.19888	-0.20481	-0.1969	-0.19473
		0.93156	0.75158	0.60454	-0.47456	0.42677	-0.36471	0.32929	-0.29775	-0.28373	0.25466	-0.26073	-0.23782	0.21826	-0.20996	0.20497	0.20605	0.20344	0.20994	0.19025	-0.2001	0.19841	-0.19034	0.18093	0.20777	-0.19896	-0.20505	0.19694	-0.19473
		0.93183	0.75173	0.60501	-0.47535	0.42721	0.3651	-0.32995	0.29828	-0.28417	0.25519	-0.26085	0.238	-0.21831	0.21062	0.20505	-0.20625	-0.20348	0.21042	-0.19063	0.20036	0.19926	0.1904	-0.18122	0.20798	0.19908	-0.20534	-0.19743	0.19498
		0.93202	0.75218	0.6054	0.47574	0.42793	0.36686	0.33062	0.29838	-0.28419	0.25537	-0.26101	-0.23916	0.2184	-0.21069	-0.20521	-0.20743	-0.20355	0.21074	0.19088	-0.20062	0.19939	-0.19063	0.18147	0.20811	-0.19912	-0.20542	0.19745	-0.19556
		0.93341	0.75357	0.6057	0.47598	0.42916	-0.36874	-0.33141	-0.29838	-0.28477	0.25608	0.26188	-0.23958	-0.21925	0.21096	0.20569	0.20751	0.2036	0.21099	0.19113	-0.20085	0.19954	-0.19141	-0.18201	0.20829	0.19956	0.20606	0.19772	-0.19565
		0.93356	0.75488	0.6065	-0.47633	0.42917	0.36964	-0.3316	-0.29853	0.2849	0.25608	-0.26253	-0.24023	-0.21953	-0.21162	-0.20571	0.20801	0.20425	-0.21101	-0.19192	0.20097	0.20004	0.19154	0.18217	-0.20851	0.19969	-0.20637	-0.19776	0.19573
		0.93393	0.75529	0.60724	-0.47756	-0.42923	-0.37045	0.33165	0.29873	-0.28492	0.2565	0.26281	-0.24029	0.21955	-0.21176	0.20643	-0.20802	0.20427	0.21121	-0.19203	0.20136	-0.20032	0.19164	0.18217	-0.20875	-0.19979	0.20661	-0.19791	-0.19582
		0.93441	0.75684	0.60743	0.47911	0.43073	0.37258	-0.33274	-0.29938	0.2851	0.25684	0.26312	-0.24059	0.22008	0.21215	0.20654	-0.20804	-0.20443	0.21256	0.1921	0.20304	-0.20033	-0.19188	-0.18249	0.20934	-0.20009	0.2068	0.19853	0.19598
		0.93603	0.7583	0.60787	0.47911	-0.4316	0.37351	-0.33277	-0.30037	0.28551	-0.25706	0.26359	-0.24072	0.22066	0.21308	0.20674	-0.20823	0.20497	-0.21291	0.1923	-0.20311	0.20085	0.19198	-0.18277	-0.20966	-0.2001	0.20726	0.1986	0.19614
		0.93627	0.75922	0.60917	0.47993	0.4318	-0.37438	0.33426	-0.30122	0.28563	0.25709	0.26368	0.24085	0.22083	-0.21328	0.2069	-0.20827	-0.20545	-0.21296	-0.19339	-0.20324	-0.20092	0.19301	0.18306	0.20985	-0.2006	-0.20742	-0.19889	-0.19615
		0.93643	0.76122	0.61003	0.48169	-0.43184	-0.37512	0.33454	0.3019	-0.28592	0.25747	-0.26376	0.24106	0.2211	0.21338	-0.20696	-0.20841	0.20602	0.21384	-0.19347	0.20359	-0.20104	-0.19378	-0.18333	0.20994	-0.20064	0.20751	0.19925	0.19626
		0.93757	0.7613	0.61162	0.48247	-0.43249	0.37517	0.33459	0.30212	0.28608	0.25756	-0.26385	0.24176	0.22155	0.21347	0.207	-0.20841	0.20608	-0.2142	-0.19387	-0.20366	-0.20112	0.19404	0.1835	-0.21012	-0.20104	-0.20754	-0.19939	0.19654
		0.93832	0.76145	0.6117	0.48286	0.43288	-0.37666	0.33463	0.30258	0.28669	-0.25767	-0.26421	0.24191	0.22162	0.21347	-0.20716	0.20852	-0.20627	0.21435	0.1946	0.20368	0.20131	-0.19409	0.18366	-0.21036	0.20149	0.20789	-0.19988	0.19714
		0.9391	0.76149	0.61219	0.48432	0.43293	-0.37684	0.33481	-0.3029	0.28697	0.25774	0.26446	0.24214	-0.22169	0.21384	0.20736	0.20922	0.20635	0.21479	-0.19499	-0.20525	0.2017	0.19427	0.18447	0.21055	-0.20153	-0.20792	0.19997	0.19773
		0.94002	0.76179	0.61306	-0.48451	0.433	0.37694	0.33501	0.30295	0.28722	-0.25791	0.26515	0.24256	-0.22222	-0.21408	-0.20741	-0.20988	0.20695	0.21495	0.19525	-0.20589	0.20185	0.19568	0.18457	0.21059	0.20185	-0.20806	-0.20001	0.19799
		0.9414	-0.76194	0.61415	0.48464	0.4333	0.37699	0.33546	0.30325	-0.28757	0.258	0.26585	-0.2426	-0.22228	-0.21411	-0.20759	0.21074	-0.20732	0.21505	-0.19585	-0.20597	-0.20215	0.196	0.18464	0.21138	0.20272	0.20862	-0.20007	0.19801
		0.94306	-0.76218	0.61523	0.48512	0.43406	-0.37781	0.33572	0.30358	0.28931	-0.2585	-0.26586	-0.24356	-0.22265	0.2146	-0.20761	-0.21123	-0.20739	0.21565	0.19597	-0.20602	0.20239	0.1962	0.18503	-0.2121	0.20326	-0.20866	0.2003	0.19867
		0.9432	0.76255	0.61627	0.48562	0.43414	-0.37873	0.33793	0.30366	-0.28949	-0.25892	0.26596	0.24373	0.22267	0.21472	-0.2078	0.21124	0.20786	0.21597	0.196	0.20605	0.20247	-0.19638	-0.18516	0.21221	0.20392	0.20884	-0.20061	-0.19884
		0.94669	0.76413	0.61651	0.48568	0.43448	0.37903	0.33932	-0.30546	0.29107	-0.25986	0.26606	0.24381	-0.22282	0.21506	-0.2079	-0.21141	0.20811	0.21649	-0.1964	-0.20606	0.20416	-0.19651	0.18527	0.21228	0.20399	-0.20899	-0.2017	-0.19916
		0.9479	0.76416	-0.61752	0.486	0.43492	-0.37929	-0.33951	-0.3058	0.29125	-0.26079	-0.26628	-0.24439	-0.22285	0.21637	0.20802	0.21149	-0.20844	0.21664	0.19668	-0.20645	-0.2046	-0.19658	-0.18556	-0.21239	-0.20403	-0.20911	-0.20181	0.19961
		0.95135	0.7664	-0.61767	0.48652	0.43636	-0.37973	-0.33975	-0.30622	-0.29145	0.261	-0.26776	-0.24474	-0.22289	-0.21663	0.20809	0.2117	0.20868	-0.21666	0.19709	0.20653	-0.20477	-0.19665	-0.18566	0.21285	-0.20455	0.20919	-0.2021	0.20005
		0.95305	0.76696	0.61772	0.48671	-0.43637	0.38028	0.3414	-0.30653	-0.2919	-0.26116	0.26781	0.24493	-0.223	0.21668	-0.20813	-0.21181	-0.20874	0.21735	0.19724	-0.20696	-0.20479	0.19689	-0.18607	-0.21287	-0.20495	-0.20941	-0.20211	-0.20035
		0.95366	0.76738	-0.6182	0.48814	0.43813	0.38037	0.34141	-0.30826	-0.29212	0.26127	0.26858	-0.24551	0.22325	-0.21684	0.20819	-0.21257	0.20892	0.21764	-0.19738	0.20734	-0.20485	-0.19708	0.18616	-0.21302	0.20517	-0.20947	-0.20213	0.20045
		0.9547	0.76767	0.62079	0.48855	0.44058	0.38041	-0.34141	0.30834	-0.29222	-0.26186	0.2686	-0.2456	-0.22344	-0.21698	0.20831	-0.21272	0.20905	0.21765	0.19762	-0.2076	0.20547	0.19723	0.18619	-0.21309	0.20578	0.20991	0.20226	0.20074
		0.95524	0.76796	0.62293	0.49257	-0.44075	0.38122	0.34369	0.30885	0.29338	0.2622	0.26968	0.24565	0.22462	0.21703	0.20831	0.21277	-0.20957	0.2179	0.19765	0.20762	0.20554	-0.19748	-0.18749	-0.21318	-0.20587	-0.21005	0.20279	0.20079
		0.95556	0.76917	0.62488	0.49263	0.44094	-0.38124	0.34381	0.30906	0.2935	-0.26245	-0.26985	0.24579	0.22472	0.21751	-0.20843	0.21279	-0.20994	-0.21803	0.19814	0.20791	0.20614	-0.19754	0.18757	0.21328	-0.20589	0.21019	0.20337	-0.20085
		0.95595	0.7692	0.62704	0.49294	-0.44125	-0.38179	0.34392	-0.30946	0.29354	-0.26267	-0.27017	0.24579	0.22477	-0.21758	-0.20875	0.21318	0.21021	0.21833	0.1982	0.20807	-0.20615	0.19768	-0.18787	-0.21345	0.2065	0.21024	-0.20359	-0.20112
		0.95615	0.76953	0.62717	0.49447	-0.44202	0.38249	0.34393	-0.30952	0.29357	0.26328	0.27026	-0.24583	-0.22499	-0.21857	0.20885	-0.21377	-0.21064	0.21835	-0.19852	-0.20822	-0.20647	0.19782	0.18794	-0.21348	0.20662	0.21041	-0.20383	-0.20123
		0.95798	0.77005	0.6274	0.49504	0.44253	-0.38276	-0.34393	0.30984	0.29371	0.26333	0.27037	-0.24584	-0.225	0.21957	-0.2091	0.21394	0.21075	-0.21839	-0.19894	-0.20826	0.20655	-0.19816	0.18819	-0.21375	-0.20689	0.21082	0.20403	-0.20129
		0.95895	0.7701	0.62943	0.49556	0.44409	0.38357	-0.3442	0.31052	0.294	0.26348	0.27145	-0.24592	0.226	0.21985	-0.20947	0.21428	0.21077	-0.21846	-0.19963	0.20878	-0.20721	-0.19915	-0.18848	-0.21426	0.20709	0.21109	-0.20421	0.20133
		0.95969	0.7722	0.62947	0.4956	0.44457	0.38377	-0.34432	-0.31076	-0.29436	-0.26428	0.27152	0.24614	0.22648	-0.22059	0.20958	0.21452	0.2108	0.21869	-0.19986	-0.20921	0.20731	0.19984	-0.18865	-0.21431	0.20719	0.21141	0.20422	0.20185
		0.96046	0.77429	0.63082	0.49589	0.44486	0.38425	0.34442	0.31173	0.2964	-0.265	0.27164	0.24621	-0.22685	0.22076	-0.20972	0.21502	0.21086	-0.21888	0.20029	-0.20976	0.20775	0.2005	-0.18966	0.21478	0.20723	-0.21145	-0.20446	-0.20212
		0.96091	0.77467	0.63093	0.49644	-0.44651	-0.38453	-0.34528	-0.31201	-0.29643	0.26595	0.27189	0.24659	0.22693	-0.22103	-0.20999	-0.21538	-0.21107	-0.21911	-0.20055	-0.20981	-0.20793	-0.20087	0.18973	0.21488	0.20804	0.21158	-0.20449	0.20281
		0.96133	0.77488	0.63094	-0.49664	0.44658	-0.38555	0.3453	0.31373	0.2969	0.26634	-0.27211	0.24668	-0.22709	0.22195	-0.21005	-0.21545	-0.21128	-0.21918	-0.20084	0.21039	-0.2081	0.20142	-0.18999	-0.21492	-0.20833	0.21201	0.20453	-0.20335
		0.96166	0.77506	0.63128	0.49677	0.44665	-0.38648	0.34533	-0.3138	-0.29705	0.26654	-0.27225	0.24697	-0.22716	-0.22209	-0.21038	0.21554	0.21138	0.21948	-0.20086	0.21048	-0.20842	-0.20187	-0.19115	0.21562	-0.20846	0.21217	-0.20515	-0.20351
		0.96279	0.77616	0.63148	-0.49696	0.44699	0.38833	-0.34617	0.31382	0.29743	-0.26666	0.27228	-0.24756	-0.22727	0.22225	-0.21048	-0.21594	-0.21216	0.21982	-0.20114	0.21056	-0.20843	-0.20234	-0.19165	-0.21562	-0.20866	0.21224	-0.20525	-0.20428
		0.96559	0.77728	0.63298	0.4978	-0.44718	-0.38878	0.34661	0.31478	0.2985	-0.26696	-0.27236	0.24759	0.22739	-0.2225	0.21072	0.21639	0.21232	-0.21982	0.20126	0.21073	0.20907	0.20276	0.19194	-0.21573	-0.20872	0.21224	-0.20526	-0.20436
		0.96603	0.77961	0.63335	0.4985	-0.44768	0.38916	0.34676	0.3148	-0.29856	0.2672	0.27275	-0.24804	0.22801	-0.22254	0.21091	0.21654	-0.21265	-0.21986	0.20138	0.21107	0.20921	-0.20323	0.19325	-0.21595	-0.20877	-0.21263	0.20541	0.20448
		0.96614	0.77973	0.63484	0.49922	0.44797	0.38975	0.34682	0.31497	-0.29862	0.26759	-0.27294	0.24827	0.22804	0.22278	0.21107	-0.21664	-0.21292	0.21989	0.20142	0.2111	0.20938	-0.20343	0.19357	-0.21604	0.20883	0.2135	-0.20613	-0.20472
		0.96643	0.78012	0.63514	0.49923	-0.44904	-0.39018	-0.3473	0.31513	0.29971	-0.2679	0.27385	-0.24839	0.2281	0.2228	0.21192	0.21694	-0.21301	0.21991	0.20148	-0.2111	0.21027	-0.20353	0.19372	0.21621	0.20901	-0.21402	0.20684	-0.2054
		0.96662	0.7809	0.63625	-0.49976	0.44936	0.39109	0.34852	0.31577	-0.29975	0.26807	0.27401	-0.2485	0.22839	-0.22309	-0.21319	0.21725	0.21319	-0.22019	0.20149	0.21193	0.21031	-0.20372	0.19393	0.21685	-0.20926	0.21412	0.20698	-0.20648
		0.96726	0.78094	0.63646	0.49993	0.44954	0.39237	0.34874	-0.31583	-0.30019	0.26824	-0.27403	0.24873	0.22927	-0.22317	-0.21342	-0.21733	-0.21325	-0.22021	-0.20149	0.21195	-0.21031	0.20376	-0.19417	-0.21719	0.20978	0.21463	0.20699	0.2065
		0.9685	0.78301	0.63797	-0.50078	0.45033	-0.39275	-0.34907	0.31595	-0.30052	0.26861	0.2745	-0.24877	-0.22937	0.22345	-0.21347	-0.21794	0.21402	0.22032	0.2017	0.21311	0.21052	0.2038	0.19441	0.2174	0.21019	-0.21496	-0.20725	-0.20709
		0.97015	0.78309	0.63822	-0.50122	0.45135	0.39277	0.34908	0.31608	-0.30075	0.26925	-0.27457	-0.24887	-0.22954	0.22352	-0.21396	0.21796	0.21408	-0.2206	0.20214	-0.21322	-0.21054	0.20405	0.19508	-0.21752	0.2105	0.21497	0.20746	-0.20711
		0.97125	-0.78403	0.63825	0.50161	0.45202	0.39282	0.35067	0.31715	0.30144	-0.26936	0.27484	-0.24891	0.2303	0.22371	0.21484	-0.21803	-0.21417	-0.22123	-0.20253	0.2139	0.21077	-0.2044	0.19525	0.21768	0.21151	0.21512	0.20752	-0.20714
		0.97478	0.78521	0.63906	0.50214	0.45207	-0.39291	-0.35161	0.31725	0.30149	-0.26945	-0.2758	-0.24908	0.2304	0.22385	0.21504	0.21918	0.2142	-0.22155	-0.20292	0.21401	0.21123	-0.20444	-0.19526	0.2178	0.21153	0.21516	-0.20772	-0.20785
		0.97598	0.78626	0.64134	-0.50248	0.45282	0.39304	0.35418	0.31863	0.30182	0.26948	-0.2761	-0.24974	0.2307	-0.22437	-0.21545	-0.21948	0.2142	-0.22259	0.20304	-0.21448	0.21145	-0.20455	0.19555	-0.21933	-0.2122	0.21521	0.20818	0.20843
		0.9765	0.78661	0.64144	0.50271	0.45306	-0.39304	0.35423	0.31874	-0.30192	-0.26951	0.27679	0.25006	-0.2325	0.22511	0.21601	0.21971	-0.21422	-0.22267	0.20371	-0.21487	0.2117	0.20536	0.19566	-0.2196	-0.21247	-0.2153	0.20858	0.20881
		0.97696	0.78725	0.64185	0.5029	0.45651	-0.39511	0.35433	0.31878	0.30204	-0.26965	0.27694	-0.25009	-0.23252	-0.2255	-0.21606	-0.22004	0.21434	0.22282	0.20403	-0.215	-0.21171	0.20543	0.19614	0.22002	0.21317	0.21572	0.20888	-0.20924
		0.97744	0.78756	-0.64203	-0.50351	0.45703	0.39567	-0.35467	0.31971	-0.3023	-0.26985	0.27717	0.25049	0.23263	0.2257	-0.21671	-0.22036	-0.21494	0.22291	-0.20441	0.2152	0.21178	-0.20578	-0.1962	0.22006	0.21323	0.21579	-0.20928	-0.20965
		0.97756	0.7888	0.64233	0.50372	0.45772	0.39846	0.35549	0.31985	0.30279	-0.26985	0.27717	-0.25055	0.23318	0.22578	0.21694	-0.2207	0.21514	-0.22297	0.20469	0.21535	-0.21223	0.20579	0.19653	-0.22028	0.21337	-0.21624	-0.20993	-0.21085
		0.97787	0.78892	0.64351	0.50526	0.45788	0.39932	0.35626	0.31992	-0.30328	-0.27046	0.27783	-0.25119	-0.23359	-0.22673	-0.21694	-0.22077	0.21542	0.22308	0.20497	0.21556	0.2123	0.20669	-0.19749	0.22038	0.21387	0.21685	0.20999	-0.21122
		0.97878	0.78933	0.64373	-0.5056	0.45872	0.39987	0.35647	0.32028	0.30339	-0.27134	-0.27783	-0.25123	-0.23398	0.22676	0.21699	0.22101	0.21567	-0.22405	0.20531	-0.21559	-0.21255	-0.20709	-0.19801	0.22054	0.21388	0.21687	-0.21045	-0.21142
		0.98107	0.7908	0.64392	-0.50561	0.45919	0.40036	0.35653	0.3204	-0.30399	0.27187	0.27787	-0.25182	0.23412	0.22772	0.21712	0.22122	-0.21569	-0.22416	0.20543	-0.21571	0.2129	0.20727	-0.19846	-0.22114	0.21413	0.21707	0.21047	0.21188
		0.98311	0.79081	0.644	-0.50606	0.46089	0.40039	-0.35667	0.3214	0.30456	-0.27242	-0.27904	0.25184	0.23489	-0.22786	0.21718	0.22123	-0.21604	-0.22448	-0.20569	0.21592	-0.2131	0.20734	0.19983	-0.22125	0.21421	0.2173	-0.21065	0.21207
		0.98313	0.79271	0.64404	-0.50705	0.46285	0.40083	-0.35677	0.32157	0.30466	-0.2725	-0.27969	0.25196	-0.23505	0.22823	0.21721	0.22134	0.21627	0.22449	0.20577	0.21593	0.21312	0.20749	0.19998	0.22133	-0.2144	-0.21733	-0.21185	0.21211
		0.98356	0.79287	0.64409	0.50749	0.46319	0.40156	-0.3568	-0.32158	0.30481	-0.27284	0.28051	0.25287	-0.23507	-0.22877	-0.2173	0.22175	0.21632	0.22508	0.20589	0.21626	-0.21373	-0.20765	-0.20025	0.22135	-0.21477	-0.21806	-0.21205	0.21223
		0.98366	0.79287	0.64427	0.50755	-0.46328	0.40164	0.35681	0.32163	-0.30493	0.27321	-0.28074	0.25341	0.23511	0.22886	-0.21732	-0.22181	0.21671	0.22526	-0.20603	0.21631	-0.21394	-0.20787	-0.20059	0.22163	-0.21517	0.21809	0.21228	-0.21261
		0.98387	0.79467	0.6454	0.50803	0.4635	0.40252	-0.35745	0.32208	0.30514	0.27336	-0.28174	-0.25371	-0.2353	0.22908	-0.21749	0.22182	0.21691	0.22533	-0.20624	0.2168	0.21421	-0.20826	-0.20066	-0.22191	-0.21567	-0.21832	-0.21275	-0.21311
		0.98536	0.79497	0.64618	0.50827	-0.46366	0.40288	-0.3576	0.32334	0.30536	0.27344	-0.28196	-0.25397	-0.23592	0.22921	-0.21761	0.22251	0.21734	-0.22534	-0.20652	0.21755	-0.2147	0.20846	0.20076	0.22239	0.21628	0.21838	-0.21315	0.21322
		0.98592	0.79838	0.64696	-0.50833	-0.46465	0.40296	0.35937	-0.32334	0.30607	-0.27371	0.2823	-0.25456	-0.23625	-0.22954	0.2181	-0.22283	0.21752	0.22537	0.20756	-0.21767	-0.21509	0.20856	0.20082	-0.22243	-0.21633	-0.21906	-0.21319	0.21352
		0.98704	0.80007	0.64722	0.50852	0.46548	0.40352	-0.35956	-0.32352	0.30627	-0.27407	0.28261	-0.25526	-0.23705	0.22959	-0.21813	0.22291	-0.21756	0.22652	-0.20778	0.21768	0.21516	-0.20871	0.20139	-0.22273	0.21649	0.22026	-0.21361	0.21353
		0.98752	0.80121	-0.64979	-0.50885	0.46564	0.40372	0.36082	-0.32402	0.30644	0.27452	-0.28334	0.25623	0.23764	0.2297	-0.21817	0.22301	0.21762	0.22657	0.20783	0.21875	0.2152	-0.2089	-0.20145	0.22336	0.21655	-0.22027	0.21364	0.21376
		0.98794	-0.80157	0.65138	0.50927	0.46664	0.40374	0.36119	-0.32433	0.3066	0.27571	0.28358	0.25631	-0.23788	-0.23003	0.2184	0.22325	0.21812	0.22671	-0.20791	-0.21916	0.2156	-0.20938	0.20159	0.22361	0.21666	-0.22034	0.21368	-0.21377
		0.99336	0.80672	0.65332	0.50952	-0.46751	0.40391	0.3612	-0.32443	-0.30718	0.2759	-0.28387	0.25671	0.238	0.23099	0.21851	-0.22373	-0.2182	0.22702	-0.20793	0.21959	0.21587	-0.20945	0.20159	0.22393	0.21706	0.22056	-0.21426	-0.21382
		0.99408	0.80674	-0.65423	0.50998	-0.46758	-0.40408	0.36148	0.32528	-0.30752	-0.27619	0.28415	0.2574	0.23807	-0.23101	-0.21883	0.22393	-0.21917	-0.22748	-0.20802	-0.21976	0.21596	0.20973	-0.20162	0.22426	0.21738	0.22057	-0.21482	-0.21405
		0.99446	0.80675	0.6546	0.51043	-0.46857	0.40464	-0.36222	0.32534	0.30794	0.27662	-0.28482	0.25783	0.23814	-0.23142	-0.21894	0.22403	-0.21927	-0.22757	-0.2089	-0.21983	0.21626	-0.21016	0.20177	0.22433	0.21748	0.22057	-0.21493	-0.21498
		0.99597	0.80807	-0.6549	0.51118	-0.46868	-0.4056	-0.36224	-0.32539	0.30847	-0.27753	0.28559	-0.25799	0.23892	-0.23143	-0.21897	0.22433	-0.21963	-0.22815	0.20906	0.22078	-0.21692	-0.21024	0.2023	-0.22444	-0.21791	-0.22084	0.21513	-0.21534
			0.80808	0.65611	0.51134	0.46885	-0.40593	0.36238	0.32578	-0.30921	0.27761	0.28567	0.25827	0.24065	0.2317	0.21931	0.22445	0.21975	-0.22825	0.21011	-0.22098	-0.21697	0.21077	-0.2023	-0.22479	-0.21808	-0.22087	0.21566	0.21561
			0.80924	0.65649	-0.51185	0.47094	0.40622	0.3632	0.32695	0.30998	0.27787	-0.28602	0.25934	-0.24072	0.23187	0.21933	0.22455	-0.21999	0.22836	0.21015	0.2211	-0.21708	-0.21096	0.20235	0.22494	0.2185	-0.22092	0.21616	0.21562
			0.80971	0.65651	0.51202	-0.47248	0.40661	0.3633	-0.32704	0.31	0.27858	0.28614	-0.25953	0.2408	-0.23232	0.22035	0.22463	0.22047	-0.22914	0.21078	-0.22121	-0.2174	-0.21101	0.20237	0.22549	0.21859	-0.22179	-0.21665	-0.21592
			0.81009	0.65673	0.51258	-0.47474	-0.40703	0.36372	-0.3271	0.3109	0.27866	0.28615	0.25958	-0.24122	0.23251	0.2205	0.22469	-0.22048	0.22959	-0.21092	-0.22147	-0.21811	0.21112	-0.20244	0.22624	-0.21878	0.22226	-0.21681	-0.21611
			0.81043	0.65684	0.51342	0.47533	-0.40788	-0.36446	0.32713	0.31139	-0.27912	-0.28741	0.25963	0.24123	-0.23295	0.22057	-0.22493	0.22157	-0.22962	0.21126	-0.22148	0.21817	-0.21125	0.20247	-0.22656	-0.21883	0.22332	-0.21688	-0.21648
			0.81068	0.65719	-0.51343	0.47663	-0.40825	0.36548	0.32715	0.31152	0.27913	0.28786	0.25996	-0.24188	0.23373	0.22173	-0.2258	0.22174	0.22968	0.21127	0.2222	0.21855	-0.21172	0.20256	-0.2267	0.21928	-0.22355	0.21704	-0.21651
			0.81235	-0.65724	0.51382	0.47664	0.4086	-0.36678	0.32885	0.31244	-0.27923	0.28807	-0.2608	-0.24208	0.23424	0.22188	0.22583	0.22176	0.22982	0.21129	-0.22259	0.21856	-0.21182	-0.20271	-0.22679	0.21929	-0.22363	-0.21712	0.21671
			0.81288	0.65845	-0.5154	0.47676	-0.40873	0.36843	0.3289	-0.31266	-0.27942	0.2889	0.2613	0.24211	0.23444	-0.22194	-0.22609	0.22201	0.23014	-0.2119	-0.22266	0.21866	0.21208	0.2028	-0.22737	0.21951	-0.22372	-0.2172	0.21725
			0.8129	0.65889	-0.51658	-0.4769	-0.40984	-0.36899	-0.32914	-0.31276	0.27956	-0.28926	0.26217	0.24219	-0.2346	0.22205	0.22642	-0.2223	-0.23019	0.21236	-0.22318	0.21884	-0.21242	-0.20361	0.22741	0.21985	0.22383	-0.21738	-0.21747
			0.813	-0.659	0.51738	0.47716	0.41015	-0.3694	0.33026	-0.31286	0.27979	-0.28939	0.26219	-0.24226	-0.23516	0.22207	0.22645	-0.22234	0.23021	-0.2139	-0.22361	0.21909	0.21275	0.2044	-0.2276	-0.21999	-0.2239	0.21759	0.21759
			0.81339	0.65918	0.51806	0.47847	-0.41057	0.37014	-0.3304	0.31387	0.28106	0.28951	-0.26221	-0.24277	0.23563	0.22253	-0.22683	0.22237	0.23058	0.21447	0.22396	-0.21917	0.213	0.2047	-0.22787	0.22035	0.22401	0.21794	-0.21768
			0.81342	0.65951	0.51914	0.4786	0.41074	0.37021	-0.33054	-0.31412	-0.28115	0.28958	0.26225	0.24285	-0.23599	0.22266	0.22802	-0.22287	-0.23059	0.21465	-0.22408	0.21935	0.21311	0.20482	0.22799	-0.22064	0.22459	0.21935	-0.21769
			0.81492	0.65971	0.51987	0.47911	0.41078	-0.37204	0.33059	0.31422	-0.28152	0.28979	-0.26332	-0.24288	0.23618	-0.22271	-0.2282	0.2229	-0.23156	0.21511	0.22425	-0.21943	-0.21316	-0.2053	-0.2282	-0.22113	0.22484	0.21938	0.21788
			0.81541	-0.65983	0.52021	0.47964	0.41089	0.37243	0.33083	-0.31442	0.28187	-0.28979	0.2634	-0.24301	0.23618	0.22286	-0.22834	-0.223	0.23158	-0.21537	0.225	0.21952	-0.21322	-0.206	-0.22828	-0.22113	0.22494	-0.21948	-0.218
			0.81612	0.66062	0.52083	-0.48011	0.41236	0.37299	-0.33152	-0.31468	0.28244	-0.28983	0.26388	0.24349	0.2364	0.22389	-0.22837	0.22325	-0.23168	-0.21612	-0.22525	0.21963	-0.21381	-0.20628	-0.22834	0.22115	0.22495	0.22015	-0.2184
			0.81737	-0.6619	0.52131	0.48082	-0.41252	0.374	0.33202	-0.31486	-0.28279	0.28986	0.26397	0.24365	0.23652	-0.22431	0.22857	-0.22355	0.23175	-0.2169	0.22542	0.21973	-0.21399	0.20632	-0.22886	-0.22127	0.22511	-0.22023	-0.21842
			0.82057	0.66202	0.52175	-0.48088	-0.41375	-0.37451	-0.3326	0.31497	-0.28295	-0.29015	-0.26406	0.24481	-0.23691	-0.22527	0.22862	0.22423	0.23213	-0.2169	0.22548	-0.21977	0.21464	-0.20697	-0.22896	-0.22143	-0.22537	-0.2207	-0.21856
			0.82155	0.66263	-0.52213	0.48301	0.41422	0.37468	-0.33279	0.31563	-0.2835	-0.29036	-0.2642	-0.24481	0.23699	-0.22619	-0.22893	-0.22423	-0.23226	-0.21693	0.22559	-0.22022	-0.21474	0.20763	0.22898	0.22212	-0.22553	0.22073	-0.21926
			0.8219	-0.66301	-0.52267	-0.48312	0.4154	-0.37539	0.33326	-0.31595	-0.28432	-0.29102	-0.26425	0.24529	-0.23721	0.22675	-0.22895	-0.22455	-0.23234	-0.2171	0.22631	-0.22053	0.21485	0.20785	-0.22958	0.22222	0.22563	-0.22123	-0.21989
			0.82214	0.66371	-0.5229	-0.48346	0.41612	-0.37542	0.33341	-0.31646	0.28453	-0.29152	0.26448	0.24562	0.23731	-0.22684	-0.22937	-0.22484	-0.23262	-0.21715	0.22644	0.22118	0.21485	-0.20791	0.22987	-0.22358	-0.22567	-0.22167	0.21995
			0.82377	0.66377	-0.52299	0.4835	0.41625	0.37577	0.33386	-0.31675	-0.28472	-0.29196	-0.26462	0.24606	0.23737	-0.22707	-0.22963	-0.22511	0.23344	-0.21728	-0.2272	-0.22125	0.21514	-0.20815	-0.22995	0.22369	0.22606	-0.22196	0.22047
			0.82453	0.66527	0.52441	0.48358	0.41654	0.37584	-0.33393	-0.31686	-0.28503	0.29211	-0.2649	-0.24635	-0.23782	0.22746	-0.2297	-0.2252	0.23372	0.21742	0.2281	-0.22148	0.21565	-0.20819	0.2302	-0.2239	0.22623	-0.22203	0.22055
			0.82522	-0.6667	0.52471	-0.4845	-0.41711	0.3762	0.33434	-0.31727	-0.28531	-0.29231	0.26499	0.24674	0.23861	-0.22763	0.22989	-0.22575	0.23384	0.21752	0.22814	-0.2215	0.21568	-0.20882	-0.23053	-0.22438	0.22626	-0.22302	0.22081
			0.82551	0.66773	0.52548	-0.48516	0.41757	0.37633	0.33494	-0.31743	-0.28555	0.29297	0.26565	-0.24682	0.23864	0.22811	0.22999	-0.2259	0.23393	-0.2178	0.22818	-0.22152	0.21575	-0.20928	-0.2323	0.2244	-0.22648	-0.22326	-0.22121
			0.8266	0.66985	0.52607	-0.48551	0.41845	0.37648	0.33522	0.31771	0.28624	-0.2931	0.26581	0.24695	0.23878	-0.22825	-0.23001	-0.22594	-0.23476	-0.21835	0.22821	0.22158	-0.21578	0.20941	0.2324	-0.22447	-0.22652	-0.22335	0.22171
			0.82691	0.6711	-0.52638	0.4863	0.41927	0.37651	-0.33544	-0.31783	-0.28769	-0.29316	0.26598	0.24695	-0.23894	0.22849	-0.23135	0.22641	-0.23476	0.21856	-0.22896	-0.222	0.21758	-0.20965	-0.23253	-0.22522	-0.22661	-0.22415	0.22183
			0.82727	-0.67114	0.52782	0.48657	0.41928	0.3779	0.33562	-0.31911	0.28814	0.29343	0.26615	0.24757	-0.23923	0.22869	-0.23162	0.22646	0.23489	-0.21858	-0.22932	-0.2223	0.2179	0.20986	-0.23265	0.22551	-0.22662	-0.2244	-0.22185
			0.82885	0.67152	-0.52828	0.48695	0.41955	-0.37861	0.33571	-0.31936	-0.28866	-0.29395	0.26701	0.2479	0.2396	-0.22913	0.23206	0.22653	-0.23506	0.21901	0.22933	0.2226	0.21792	-0.2099	-0.23288	0.22588	-0.22749	0.22473	0.22198
			0.82922	0.6728	0.52879	0.48706	0.41957	-0.37873	-0.33607	0.32021	0.28958	-0.29463	-0.26737	-0.24827	0.23965	0.22958	-0.23228	0.22656	-0.23518	-0.21926	-0.2295	0.2233	0.21803	-0.21006	-0.23291	0.22719	0.22786	0.22501	-0.22198
			0.82936	0.67283	0.52984	0.48769	0.41994	-0.37892	-0.33616	0.32025	-0.2896	0.29544	-0.26801	-0.24866	-0.23968	-0.22989	-0.2323	0.22657	-0.23523	0.21955	-0.22952	0.22348	-0.21834	-0.2101	-0.23294	-0.22754	0.2279	-0.22503	0.22294
			0.82954	0.67307	0.53	-0.48769	0.42025	0.37911	0.3362	0.32046	0.28963	-0.29587	-0.2682	-0.24878	-0.2399	0.22997	0.23237	0.22719	0.23534	0.21956	-0.22959	-0.22353	0.21893	-0.2102	-0.23339	0.22772	-0.22909	0.22559	0.22336
			0.82965	-0.67323	0.53016	0.48925	0.4221	-0.38069	0.33671	0.32098	0.29056	0.29615	0.26831	0.24881	0.24002	0.23004	0.23249	0.22739	-0.23602	0.21957	0.22985	0.22377	-0.21894	-0.21026	-0.23361	0.22775	0.2292	-0.22569	-0.22366
			0.83025	0.67385	0.53054	0.48954	0.42321	-0.38081	0.33762	-0.321	-0.29122	0.29626	0.26834	-0.24912	-0.24047	0.2303	-0.23256	0.2276	-0.23602	0.22008	0.22986	0.22383	0.21919	-0.21035	0.23363	-0.22797	-0.22953	0.22608	-0.22375
			0.83139	0.67396	0.53088	0.49001	0.42353	0.38103	-0.33773	-0.32127	-0.29129	0.29639	-0.26839	0.24935	0.24048	0.2305	0.23282	-0.22774	0.23624	-0.22041	0.22993	-0.22408	0.22046	0.21048	0.23445	-0.22803	-0.22989	0.22693	-0.22387
			0.83175	0.67645	0.53121	0.49032	-0.42375	0.3812	-0.33854	0.32146	0.29297	-0.29657	0.26944	-0.2494	0.24072	0.23089	-0.23339	0.22784	0.23647	0.22063	0.22994	0.22422	0.22049	-0.21059	0.23448	-0.2281	0.22991	0.2276	0.225
			0.83245	0.6771	0.5321	0.49049	0.42417	0.38128	0.33888	-0.32169	-0.29566	0.29677	0.26948	-0.24951	0.24075	0.23116	-0.2336	0.22808	-0.23674	0.22066	0.23048	-0.22435	-0.22077	0.21062	-0.23464	0.22813	-0.22992	0.22782	-0.22515
			0.83302	-0.67823	0.53226	0.4908	0.42418	0.38133	-0.3393	0.32262	0.29603	0.29723	0.26952	-0.24952	-0.24128	0.2315	-0.23389	0.22823	0.23714	0.22074	-0.23051	-0.22462	-0.2212	-0.21066	-0.23503	0.22824	-0.23012	0.22786	0.22526
			0.83467	0.67834	0.53243	0.49222	0.42462	0.38171	0.33943	0.32277	0.29608	0.29737	0.27003	-0.2496	0.24158	-0.23187	-0.23426	0.22852	0.23722	0.22096	-0.23055	0.22477	-0.22133	0.21113	-0.23503	0.22824	0.23059	0.22816	-0.22528
			0.83467	0.67837	-0.53263	0.49262	0.42496	0.38211	0.33945	0.32309	0.29613	-0.29848	-0.27051	-0.24968	-0.24243	-0.23303	-0.23432	0.22909	0.23766	0.22136	-0.23094	0.22487	0.22134	0.21118	-0.23593	-0.22859	0.23084	0.22836	-0.22537
			0.83549	0.67842	0.53295	0.49311	0.42507	0.38223	-0.33957	-0.32328	-0.2964	0.29854	-0.27056	0.24969	0.24287	0.23425	-0.23441	0.2292	-0.23795	0.22146	-0.23137	0.22497	0.22161	-0.21153	0.2363	-0.22878	-0.23148	0.22872	0.22561
			0.83574	0.68026	0.53368	-0.49342	-0.42583	-0.38281	0.34119	0.32375	0.29674	-0.29865	0.2706	0.24973	0.24313	-0.23448	0.23452	0.22926	-0.23804	0.22146	-0.23175	-0.22601	0.22178	0.21196	0.23638	0.22884	0.23169	-0.22883	0.22576
			0.8362	-0.68028	0.53406	0.4939	-0.42595	0.38376	0.34139	-0.32457	-0.29699	0.299	0.271	0.24977	0.24314	-0.23481	-0.23467	0.22974	0.23807	0.22183	-0.23175	0.22618	0.22224	-0.21219	-0.23654	-0.22931	-0.23208	0.22889	0.22598
			0.83732	0.68064	0.53431	-0.49481	0.42621	-0.38466	-0.34194	-0.32473	0.29877	-0.29941	0.27103	-0.25039	-0.24326	0.23572	-0.23552	0.22981	-0.23816	-0.22192	0.23196	0.22638	-0.2224	-0.21246	-0.23664	-0.22934	0.23225	0.22919	0.22603
			0.83748	0.68089	0.53572	0.49499	-0.42642	0.38523	0.34218	0.32576	-0.29902	0.29992	0.27121	-0.25092	0.24353	0.23585	0.23584	-0.22981	0.23855	0.22236	0.232	0.22654	0.22256	-0.21345	-0.23667	0.22971	-0.23277	0.2292	-0.22636
			0.83777	0.68186	0.53632	-0.49542	-0.42652	-0.38592	-0.34246	-0.3265	-0.29925	-0.29996	0.27148	-0.25102	-0.24358	-0.2359	-0.23647	-0.23011	-0.2387	-0.22246	-0.2321	-0.22669	0.22277	-0.21387	0.23687	-0.22971	0.23278	-0.22923	-0.22645
			0.84222	0.68322	0.53723	0.49628	-0.42655	0.38617	-0.3425	0.32682	-0.29998	-0.30054	0.27171	0.25158	0.24362	0.23638	-0.23718	-0.2302	-0.23871	-0.22255	0.23305	0.22675	-0.22289	-0.21397	0.23691	-0.22978	0.2329	0.2296	-0.22678
			0.84315	0.68406	0.53797	0.49722	0.42694	0.38655	-0.34275	-0.32719	0.30153	0.30096	-0.27176	0.25161	0.24388	0.23645	0.23728	-0.23025	-0.23935	-0.22255	0.23315	-0.22691	-0.22307	-0.21476	0.23706	-0.22981	0.2331	-0.22963	-0.22685
			0.84403	0.68454	0.5383	0.49828	0.42702	0.38656	-0.34278	0.32768	0.30175	-0.30102	-0.27224	0.25181	0.24399	-0.23651	0.23735	-0.23063	0.23968	0.22295	0.23317	-0.22729	0.22333	-0.21484	0.23739	-0.22994	-0.23318	0.22974	0.22698
			0.84459	0.6849	0.53929	0.49924	0.42861	0.38678	0.34351	0.32793	0.30316	0.30164	-0.27255	0.25193	0.24427	0.23658	-0.23804	0.2307	-0.23999	-0.22305	-0.23351	-0.2275	0.22409	0.21491	-0.2375	0.23002	0.23348	0.23034	0.22705
			0.8446	0.68493	0.53929	0.49935	0.42874	-0.38795	0.34404	0.32868	0.30336	-0.30167	0.27276	-0.2525	0.24464	0.23662	0.23827	-0.23088	-0.24001	0.22311	-0.23394	0.22751	-0.22454	-0.21503	0.2377	0.23013	-0.2335	-0.23052	0.22764
			0.84558	0.68493	0.53936	0.49939	0.42911	0.38865	0.34414	-0.32888	0.30342	-0.30175	-0.27304	-0.25301	-0.24506	0.23705	0.23829	-0.23101	0.24002	-0.22319	-0.23398	0.22801	0.22459	0.21539	0.23783	-0.23045	0.23353	0.23054	-0.22777
			0.84659	0.6858	0.53941	0.50119	0.42932	-0.38878	0.34457	0.32905	0.30343	-0.30183	0.27317	0.25343	-0.24528	-0.23748	-0.23833	0.23142	-0.24002	0.22383	-0.23505	-0.22833	0.22483	-0.2155	0.23807	-0.23061	-0.23379	-0.23102	-0.22864
			0.84714	0.68638	0.54165	0.50179	0.42958	0.38923	-0.34484	-0.32917	-0.30387	-0.30213	-0.27394	0.25359	0.24586	0.23761	0.23856	0.23162	-0.24017	-0.22392	-0.23517	0.22865	0.22486	-0.21575	-0.23864	0.23098	0.23389	0.23115	0.22871
			0.84869	0.68648	0.5421	0.50232	0.43004	0.38941	0.34503	0.32955	-0.30408	-0.30218	-0.27398	-0.25362	0.24708	0.23824	-0.23857	-0.23189	-0.24062	0.22483	-0.2359	-0.22971	0.22489	0.2164	0.23885	0.23136	0.23416	-0.23138	-0.22965
			0.84928	0.68673	0.54268	-0.504	-0.43048	-0.38969	0.34525	0.32963	-0.30418	-0.30223	-0.2746	-0.25374	0.24762	0.23896	0.23858	-0.23191	-0.2407	-0.22532	-0.23681	0.23004	-0.2252	-0.21676	0.23903	0.23137	0.23455	-0.23142	0.22979
			0.84959	0.68675	0.54311	0.5042	0.43069	0.39061	-0.3454	-0.32979	-0.30437	-0.3041	-0.27461	0.25379	0.24801	0.2396	0.23864	0.23269	-0.24095	0.22537	0.23713	-0.23008	0.2253	-0.21697	0.23903	0.23149	-0.23457	0.23169	-0.23006
			0.85136	0.68685	0.54345	0.50527	0.4307	0.39111	0.34596	0.33165	-0.30566	0.30454	-0.27479	-0.25426	-0.24873	-0.23992	0.23883	0.23273	-0.24098	-0.22563	-0.23738	0.23021	0.22595	-0.21751	-0.23981	0.2317	-0.23458	0.23176	-0.23017
			0.85162	0.68756	-0.54387	-0.50551	0.43108	0.39157	0.3464	0.33166	-0.3061	-0.30504	0.27523	0.25487	-0.24954	-0.24082	-0.23936	-0.23303	0.24141	-0.22568	-0.23756	0.23024	-0.22606	-0.21796	-0.23987	0.23171	0.23462	-0.23198	-0.23084
			0.85356	0.6888	0.54654	0.50616	-0.43119	0.3918	-0.34721	-0.3322	0.30664	0.30573	0.27591	-0.2552	-0.2498	0.24093	0.2395	0.23315	0.24141	-0.22575	0.23767	0.23027	-0.22695	-0.21857	0.24014	0.23173	0.23485	-0.23199	0.23092
			0.85404	0.69029	0.54789	-0.50723	0.43156	0.39218	0.34796	0.33221	0.30756	0.30646	0.27594	0.25523	0.24982	0.24105	0.23992	-0.23321	-0.24213	-0.22579	-0.23787	0.23034	-0.22701	-0.21904	-0.2403	0.23194	-0.23512	0.23204	0.23126
			0.85483	-0.69034	0.54789	0.50728	-0.43156	-0.39231	-0.34813	-0.33299	-0.30766	-0.30668	0.27604	-0.25527	0.24986	0.24125	0.24001	0.23338	0.24223	0.22581	0.23843	0.23045	-0.22708	0.21914	0.24048	-0.23222	0.23539	-0.23215	-0.23184
			0.85536	0.69132	0.54888	0.50785	-0.43304	-0.39246	0.34843	-0.33323	0.30774	0.30672	0.27656	0.25555	-0.2499	-0.24155	-0.2401	-0.23342	0.24238	-0.22656	-0.23905	0.23047	-0.22808	-0.21935	-0.24099	0.23225	0.23542	-0.23229	-0.23224
			0.85821	0.6926	0.55006	0.50811	0.43328	0.39482	-0.34855	0.33385	-0.30806	-0.30716	-0.27699	0.25638	-0.2505	0.24173	0.24047	-0.23344	-0.24257	-0.22666	0.23911	-0.23074	-0.2281	-0.22022	0.24106	0.2323	0.23567	-0.23248	-0.23229
			0.85895	0.69341	0.55097	0.50812	0.43684	-0.39497	0.34904	0.33398	-0.30812	-0.30727	0.27773	-0.25646	0.25051	-0.24186	-0.24058	0.23375	0.24282	-0.22697	0.23912	0.23088	-0.22814	0.22046	0.24159	0.23293	-0.23599	0.23307	0.23302
			0.85947	0.69356	0.55142	0.50881	0.43735	0.39503	0.34913	-0.33526	0.30848	0.30794	0.27782	-0.25655	-0.25072	0.24211	0.24128	-0.23391	-0.24302	0.22698	-0.2394	0.23121	-0.22854	0.22153	0.24183	-0.23306	-0.23609	0.23316	-0.23302
			0.85989	0.69364	0.55152	0.50951	-0.43769	0.39586	-0.34973	0.33587	0.30859	-0.30826	0.27822	0.25701	0.25165	0.24283	-0.24182	-0.23394	-0.24302	-0.22704	0.23959	-0.23128	-0.2286	0.22195	0.24193	-0.23309	0.23655	0.23349	0.23318
			0.86138	0.69574	-0.55161	0.51144	0.43805	0.39692	0.34983	-0.33627	0.30998	-0.30875	0.27835	-0.25703	0.25191	-0.24284	-0.242	0.23492	0.24357	0.22739	0.2398	0.23133	-0.2292	-0.22208	0.24198	-0.23318	-0.23683	0.23356	0.23319
			0.86248	0.69691	-0.55198	0.51152	-0.43805	0.39716	-0.35005	0.33693	0.31007	-0.309	0.27843	0.25722	0.25263	-0.243	-0.24224	0.23497	-0.2439	0.22746	-0.24004	-0.23141	0.22979	0.2223	0.24212	0.23382	-0.23729	-0.23366	0.23443
			0.86303	-0.69709	0.55254	0.51155	0.43827	0.39746	-0.35009	-0.33735	0.31046	0.30935	0.27855	0.25738	0.25312	-0.24324	0.24231	0.23551	0.24407	-0.22806	-0.24051	-0.23161	-0.23051	-0.22245	-0.24214	0.23424	0.23766	0.23367	0.23513
			0.86357	-0.69728	0.55279	0.5121	0.43916	0.39777	0.35082	-0.3375	0.3108	-0.31021	0.28052	0.2577	0.25336	-0.24326	0.24236	0.23574	0.24502	0.22832	0.24058	-0.23179	0.23128	0.22246	0.24234	-0.23438	-0.23779	0.23445	0.23523
			0.86478	-0.69808	-0.55358	-0.51296	-0.44047	-0.39818	-0.3524	-0.33757	0.31099	0.31071	0.28094	0.25773	-0.25363	0.24328	-0.24261	-0.23617	-0.24506	-0.22869	-0.24088	0.23188	0.23155	-0.22306	-0.24323	0.23445	0.23867	-0.2346	-0.23526
			0.86505	0.69952	0.5538	0.51405	-0.44142	0.39836	-0.35319	0.3385	-0.31133	0.31124	-0.28095	-0.25798	-0.25469	0.24374	-0.24261	0.23623	-0.24604	-0.22895	0.24093	0.2319	0.23214	0.22366	0.24337	-0.23463	0.23872	0.23475	-0.23582
			0.86673	0.70166	-0.5544	0.5148	-0.44182	-0.39848	0.35329	-0.33861	0.31173	-0.31173	-0.28125	-0.2583	-0.25476	0.24382	-0.24265	0.23623	0.2464	0.22956	-0.24145	-0.23204	0.2324	0.22377	0.24347	-0.23544	0.23883	-0.23515	0.23665
			0.86809	0.70274	-0.55443	-0.51523	0.44252	0.39856	-0.35369	0.33878	-0.31198	-0.31186	0.28132	-0.25907	-0.25508	0.2441	0.2427	0.2364	-0.24645	0.22979	0.24162	-0.23225	-0.23258	0.22396	-0.2435	-0.2357	0.2393	-0.23532	0.23735
			0.86974	0.70282	-0.55563	0.51589	-0.443	-0.39878	0.35407	0.33927	0.31231	-0.31216	0.28138	-0.25947	0.2557	0.24415	0.24304	0.23641	-0.24655	-0.23013	-0.24162	0.23235	-0.23278	-0.22466	-0.24354	0.23571	0.23934	0.23547	-0.23738
			0.8698	0.70328	0.55684	0.51707	0.44324	0.39887	0.35418	0.33939	-0.31307	-0.31221	-0.2814	-0.26049	0.2558	0.24447	-0.24333	-0.23643	-0.24662	0.23031	0.2423	0.23306	-0.23309	-0.22469	-0.24355	0.23602	0.2396	-0.23598	0.23774
			0.86984	0.70415	0.55898	0.51752	0.44327	0.39947	-0.35478	-0.3396	0.31312	0.31254	-0.28154	-0.26062	0.25676	-0.24502	-0.24338	-0.23657	-0.24691	0.23038	0.24251	-0.23315	0.2333	-0.2249	-0.24374	0.23627	-0.24003	-0.23609	0.23786
			0.87072	0.70661	0.55905	0.51844	0.44362	0.39954	0.35528	-0.33992	-0.31328	0.31278	-0.28164	0.26091	0.25732	0.2455	-0.2436	0.23666	0.24771	0.23044	-0.24291	0.23317	0.2341	-0.22529	0.24383	-0.23674	-0.24049	-0.23638	0.23825
			0.87075	-0.70732	0.55959	0.51885	-0.44366	-0.39971	0.3553	0.34039	0.31335	0.31322	0.28189	-0.26113	0.25737	0.24553	-0.24361	-0.23749	-0.24802	-0.23087	0.24295	0.2333	0.23424	-0.22554	0.24388	0.23696	-0.24063	-0.2365	0.23829
			0.87179	0.70758	0.55963	0.51961	0.44523	-0.39988	-0.35561	-0.34137	0.31339	-0.31384	-0.28266	0.26118	-0.25768	0.24598	0.24377	-0.23768	-0.24808	-0.23098	0.24311	0.2333	0.23518	0.22566	-0.24433	0.23704	-0.24081	0.23657	0.23836
			0.87222	0.70846	-0.55963	-0.51965	0.44599	-0.40021	0.35675	0.34202	-0.31355	0.3142	0.28309	0.26154	0.25784	-0.24601	0.24382	0.23774	-0.24839	0.23115	-0.24352	0.23407	-0.23603	0.2258	-0.24444	0.2371	0.24087	-0.23723	-0.23938
			0.87295	0.70907	0.56022	0.52123	0.44624	0.40075	0.35698	0.34223	0.31383	0.31434	0.28342	-0.2616	0.25791	0.24621	0.24433	0.23924	-0.24857	0.23115	0.24401	0.23421	0.23609	-0.2262	0.2447	-0.23724	-0.24092	0.23763	0.23941
			0.87334	0.7096	0.56171	-0.52464	0.44878	0.40099	0.35745	0.34239	0.31455	-0.31467	-0.28378	-0.26162	-0.25836	-0.24818	-0.24461	-0.23946	0.24861	0.23131	0.24404	0.23429	-0.23612	-0.22672	0.24509	0.23732	-0.24108	-0.23801	0.23987
			0.87392	0.71017	0.56211	0.52473	0.4488	0.40118	0.35785	0.34246	0.31533	0.31479	0.28389	-0.26228	0.25856	0.24838	-0.24472	0.23952	-0.24894	0.23159	0.24419	0.2344	0.23631	-0.22678	0.24513	0.23756	0.24154	0.23844	0.24002
			0.87422	0.71109	0.56428	0.52486	0.44887	0.40155	-0.35795	-0.343	-0.31614	0.31497	0.28446	-0.2623	0.25869	-0.24868	-0.24579	-0.23975	0.24897	-0.23221	-0.24446	-0.23448	0.23645	-0.22712	-0.24513	-0.23756	-0.24172	0.23903	0.24012
			0.87563	0.71192	0.56432	0.52562	0.44912	0.40167	0.35845	-0.34306	-0.31683	0.31568	0.28449	0.26231	0.26	0.2487	-0.24591	0.24088	0.24936	0.23248	0.24459	0.23487	-0.23664	0.2272	0.24527	-0.23776	-0.24197	0.2392	-0.24018
			0.8758	0.71255	0.56706	-0.52653	0.44915	-0.40196	-0.36	0.34439	0.31702	0.31586	-0.28456	-0.26231	0.26014	0.24898	0.246	-0.24107	0.2494	-0.23287	0.24557	0.23497	0.23674	0.22826	0.24536	-0.23779	-0.24221	-0.23939	0.24031
			0.87614	0.71263	0.56722	0.52695	0.44979	-0.40234	-0.36002	-0.34444	-0.31702	-0.31639	0.28476	0.26232	-0.26016	-0.24928	0.24702	0.24115	0.24957	-0.23292	0.24564	0.235	0.23714	-0.2283	-0.24569	0.2378	-0.24254	0.23951	-0.24134
			0.87669	0.71276	0.56823	0.5278	0.44988	0.40264	-0.36037	0.34447	0.31707	-0.31649	-0.28518	0.26238	-0.26021	-0.24936	-0.24746	-0.24145	-0.24983	-0.23305	-0.24565	-0.23553	-0.23717	0.2287	0.24598	-0.23821	-0.2431	0.24044	0.2414
			0.87676	0.71291	-0.56877	0.5281	0.45132	0.40272	0.36112	-0.34596	-0.31764	-0.31714	0.28536	-0.26245	-0.26035	-0.24981	0.24755	0.24146	-0.25012	-0.23315	-0.24602	-0.23592	-0.23746	-0.22976	0.24637	-0.23849	0.24391	-0.24052	-0.24169
			0.8773	0.71308	-0.56927	0.52828	-0.45226	0.40369	0.36118	-0.34709	-0.31783	0.31726	-0.28537	-0.2625	0.26042	-0.25004	0.24777	-0.24199	-0.25024	0.23348	0.24664	-0.23595	0.23791	0.22997	-0.24657	0.2385	-0.24463	-0.24055	0.24177
			0.87739	0.71489	0.56968	0.52928	-0.45347	-0.40498	0.36156	-0.34739	0.31789	-0.31762	-0.28552	0.26254	-0.26058	-0.25033	0.24779	0.24216	0.25058	0.23374	0.24671	0.23604	-0.23803	-0.23016	0.24709	0.2387	-0.24484	0.24061	-0.24206
			0.87839	0.71643	0.57002	-0.52956	0.4535	0.40523	0.36207	0.34778	-0.31807	0.31764	-0.28585	-0.26262	-0.26182	-0.25101	0.24798	-0.24244	0.25067	0.23421	-0.24675	-0.23619	-0.2381	0.23018	0.24714	-0.23873	0.24534	0.24121	0.24231
			0.87858	0.71697	0.57063	0.53019	0.45356	-0.4053	0.36251	-0.34794	0.31813	0.31788	-0.28589	-0.26268	0.26231	0.25129	0.24814	0.24287	-0.25069	0.2346	-0.2468	-0.23643	-0.23814	0.23038	-0.24717	0.23874	-0.24537	0.24123	0.2426
			0.87865	0.71705	0.57115	-0.53022	0.4538	0.40545	0.36263	0.34867	0.31843	0.31808	-0.28618	0.26279	-0.26236	0.25159	0.24821	0.24299	-0.25139	-0.23507	-0.24691	0.23668	0.23837	-0.23078	-0.24778	0.23883	-0.24584	-0.24165	-0.24269
			0.87886	0.7173	0.57301	0.53083	0.4539	0.40572	0.36321	-0.34891	0.31957	-0.31817	0.28625	0.26287	-0.26258	0.25206	0.24875	0.24309	-0.25155	0.23531	-0.24745	-0.23696	-0.23842	-0.23099	0.24829	-0.2391	-0.24645	0.24174	-0.24374
			0.87938	-0.71741	0.57318	0.53205	0.45695	-0.40597	0.36324	0.35017	0.32075	0.31864	0.28691	0.26299	-0.26277	0.25234	-0.24943	-0.24315	0.2517	0.23556	0.24762	0.23815	-0.23856	0.23144	0.24841	0.23927	-0.24661	0.24215	0.24417
			0.87949	-0.7177	0.57328	-0.53217	-0.45714	0.40758	-0.36334	-0.35067	-0.3217	-0.3189	0.28703	0.26315	0.26323	0.25248	-0.24972	-0.24323	0.25203	-0.23557	0.24796	0.23835	0.23977	0.23157	-0.24842	-0.23938	0.24662	-0.24223	-0.24469
			0.88028	0.719	0.57395	0.53226	-0.45794	-0.4076	-0.36519	0.35071	0.32328	-0.31906	0.28704	-0.26352	-0.26332	-0.25257	-0.24975	0.24431	0.25225	-0.23567	0.24806	0.23888	-0.23983	0.23162	-0.24859	0.2397	0.24668	-0.24271	-0.24469
			0.88088	0.71938	-0.57559	-0.53248	0.4594	0.40766	0.3659	0.35073	0.32335	0.31937	0.28706	0.2636	0.26394	-0.2529	-0.24976	-0.24435	-0.25243	0.23593	0.24877	0.23891	-0.23988	0.23176	-0.24887	-0.24021	0.24671	0.24279	0.24507
			0.88103	0.71969	0.57595	-0.53339	0.46083	0.4082	-0.36665	0.35109	0.32393	0.31949	0.28773	0.26442	0.26399	0.25319	-0.24994	-0.24436	0.25415	-0.23636	-0.24881	0.23892	-0.24009	0.23214	0.24889	-0.24028	0.24703	0.2429	-0.24512
			0.88179	0.71977	0.57637	0.53492	-0.46088	0.4092	-0.36682	0.35121	-0.32458	0.32026	-0.28798	0.26487	-0.26405	0.25343	0.25014	0.24471	-0.25432	-0.23656	0.24906	-0.23896	-0.24012	-0.2322	-0.24938	-0.24029	0.2473	0.24304	-0.24539
			0.8818	0.72016	0.57642	0.53516	0.46282	0.40927	-0.36704	0.35131	0.32591	0.32034	0.28814	0.26489	-0.26419	0.25345	0.25022	0.24514	-0.25443	0.23657	0.24957	-0.23909	-0.24015	-0.23248	-0.24961	0.24042	0.24739	0.2433	0.24577
			0.88231	0.72233	0.57722	0.53554	0.46351	0.40989	-0.36817	0.35156	0.32712	0.32059	-0.28826	0.26549	-0.26428	0.25407	0.25076	-0.24522	0.25449	-0.23682	0.24984	-0.23928	0.24027	0.23285	0.24983	-0.24043	0.24795	-0.2438	-0.24602
			0.88314	0.72282	-0.57723	0.53657	0.46409	0.40991	0.3684	0.35214	0.32757	-0.3211	0.28844	-0.26557	0.26453	0.25447	-0.25123	-0.24531	-0.25459	-0.23698	-0.24998	-0.23972	-0.24043	-0.23299	-0.24986	0.24046	0.24804	-0.24396	0.24604
			0.88376	0.72341	0.57911	0.537	-0.46525	-0.41027	-0.36876	0.35241	0.32799	0.32111	0.28871	-0.2657	0.26455	0.25464	0.25209	0.24535	-0.25463	-0.23702	0.2503	0.23978	-0.2405	-0.23351	-0.24991	0.24054	0.24864	-0.24404	-0.24632
			0.88516	-0.72448	0.57979	0.53709	0.46538	0.4106	-0.36887	-0.35264	-0.32837	-0.3212	-0.28889	0.26652	0.26507	-0.25528	-0.25252	0.24538	0.2547	0.23745	0.25098	-0.24048	-0.24052	0.23371	-0.25018	0.24076	-0.24886	0.24437	0.24657
			0.8853	0.72524	0.58061	0.53741	0.46603	0.41105	-0.36891	0.35331	-0.32879	-0.32125	0.28894	-0.26655	0.26513	-0.25558	-0.2531	0.24548	0.25528	0.23747	0.25124	0.24054	-0.24054	0.23401	-0.25097	-0.24099	-0.24894	-0.24437	0.24674
			-0.88783	0.72531	0.58062	0.53773	0.46694	0.41106	0.36956	0.35342	-0.32952	0.32153	0.28906	-0.2667	0.26543	-0.25562	-0.25342	-0.2457	0.25543	-0.23779	-0.25126	-0.2406	0.24057	-0.23405	0.25136	0.24109	0.24927	-0.24523	0.24713
			0.88861	0.72564	0.58066	0.53845	-0.46747	-0.41107	-0.36994	0.35343	0.32993	0.32169	0.28907	-0.2668	0.26573	-0.25602	0.25348	0.24598	0.25547	0.23791	-0.25147	0.24071	-0.24068	-0.23412	0.25144	0.24134	0.24938	0.24538	0.24733
			0.88871	0.72596	0.58114	-0.53885	0.46829	0.41198	0.37209	-0.35382	0.33053	-0.32187	0.28927	-0.26705	0.26591	-0.25645	-0.2536	-0.24671	0.25585	0.23876	-0.25184	-0.24081	-0.24088	0.23518	0.25146	-0.24135	-0.24989	0.24609	-0.24734
			0.88919	-0.72636	-0.58238	0.53956	-0.46884	0.41223	0.37284	-0.35385	-0.33065	0.32231	-0.2894	-0.26739	-0.26599	-0.25672	0.25388	0.24703	-0.25607	0.23899	0.25186	0.24134	-0.24099	-0.23549	-0.25172	0.2415	-0.25022	0.24654	-0.24753
			0.89079	0.72744	0.58248	-0.53998	-0.46904	-0.41316	-0.37404	-0.35402	0.33097	-0.32276	-0.28983	0.26774	0.26619	0.25737	0.25418	0.24729	-0.25614	0.23903	0.25194	-0.24137	0.24113	0.23573	-0.25217	-0.2418	0.25034	-0.24682	0.24763
			0.89182	0.72885	-0.58282	0.5402	-0.46912	0.41319	0.37521	-0.35453	-0.33107	0.32277	0.28987	-0.26856	0.26647	-0.25749	-0.25418	-0.24743	0.25631	0.23932	-0.25198	0.24156	-0.24161	0.23652	-0.2522	-0.2424	-0.25078	0.24692	0.24817
			0.8919	0.72966	0.58408	0.54033	-0.46988	-0.41337	-0.37639	-0.35497	-0.33135	-0.32354	-0.28989	-0.26858	-0.26669	-0.25793	-0.25435	0.24773	0.25692	-0.23944	-0.25209	-0.24161	-0.24162	-0.23667	0.25275	0.24246	0.25093	0.24699	0.24869
			0.89273	0.73191	0.58503	0.5405	0.47014	0.41357	-0.37781	-0.35505	0.33178	0.32389	-0.29047	0.2687	0.26675	0.2582	-0.25481	-0.24778	-0.2584	0.23956	0.25234	0.24246	-0.24191	-0.23679	0.2529	-0.24309	-0.25192	0.24784	-0.24915
			0.89354	0.73269	-0.58578	-0.54068	0.47124	0.41446	-0.37858	-0.35583	0.33226	0.32416	0.29078	-0.26872	0.26682	0.25889	0.25503	0.24803	0.25871	-0.23962	0.25236	0.24274	0.24192	-0.2368	-0.25331	-0.24333	-0.25201	-0.24814	0.24972
			0.89487	-0.73341	-0.58607	0.54083	0.47334	0.41509	0.37864	0.35614	0.33239	-0.3245	-0.29088	-0.26884	-0.26684	-0.25959	0.25528	0.2492	0.25885	0.23998	0.25256	-0.2436	-0.24195	0.23686	-0.25332	-0.24379	0.25202	-0.24958	0.24991
			0.89527	0.73424	0.58676	0.5415	0.47356	0.41516	0.37896	0.35628	-0.33282	0.32468	0.29115	0.26924	-0.26693	-0.25974	-0.25536	0.24933	0.25904	-0.24029	0.25273	0.24367	0.24203	0.23748	0.25364	0.24389	-0.25203	-0.24972	-0.24991
			0.8967	0.73453	0.58696	0.5415	0.47364	-0.41526	-0.379	0.35632	-0.33301	0.32471	0.29136	0.26942	-0.26718	0.25979	-0.25559	0.24956	0.25953	-0.24055	-0.2528	-0.24372	0.24229	-0.23754	-0.25374	-0.24427	0.25225	0.24998	0.25022
			0.89811	0.73661	0.58727	-0.54157	0.47422	0.41654	-0.37919	0.35637	-0.33354	-0.3248	0.29206	0.26942	-0.26723	-0.26	0.25685	0.24957	-0.26007	0.24066	0.2529	0.24407	0.24336	-0.23754	0.2539	-0.2449	0.25232	0.25009	0.25035
			0.90025	0.7382	-0.58789	0.54182	0.47507	0.41665	-0.37936	-0.3567	0.33368	-0.32491	-0.29217	0.27011	0.26748	-0.26124	-0.25692	0.24961	0.26074	-0.24119	-0.2531	0.24445	-0.244	-0.23764	0.25436	0.24566	-0.2528	-0.25031	-0.25036
			0.9025	0.73842	0.58913	0.54269	0.4755	0.41668	-0.38007	0.35765	0.33373	-0.32508	-0.29235	0.27018	-0.2677	-0.26135	0.25776	0.24969	0.26083	0.24136	0.25514	0.24454	-0.244	0.23774	-0.25491	0.24576	0.25317	0.25037	0.25041
			0.90251	0.73867	0.58914	0.54271	0.47559	0.41717	0.38009	0.35784	0.33394	0.32519	-0.2925	0.27034	0.26772	-0.26181	-0.25785	-0.2497	-0.26104	0.24141	0.25526	-0.24477	0.24469	-0.23856	0.25495	0.24602	-0.25345	-0.25061	-0.2507
			0.9033	0.73923	0.59052	-0.54305	0.47563	0.41727	0.38028	0.35794	0.33477	0.3258	0.29287	-0.27077	-0.2678	-0.26192	-0.25791	-0.24993	-0.26137	0.24172	0.2556	0.24495	-0.24527	-0.23899	-0.2556	0.24602	0.25361	0.25089	0.25094
			0.90394	0.73955	0.59124	0.54425	0.47608	-0.41864	0.38038	-0.35824	-0.33485	-0.32593	0.29303	0.27166	0.26784	-0.26201	0.25794	0.25013	-0.26191	0.24216	0.25567	-0.24499	0.24547	0.23903	-0.25575	-0.24603	-0.25373	-0.25089	0.25094
			0.90417	0.73988	0.59153	0.54434	0.47659	-0.4193	0.38042	0.35864	-0.33576	0.32595	0.29404	-0.27186	0.26808	-0.26217	-0.25815	0.2503	0.2622	0.24227	-0.25605	-0.24528	0.24549	0.23924	-0.25594	-0.24628	-0.25375	-0.25136	0.25106
			0.90656	0.74019	0.59173	0.54528	-0.47789	0.41932	-0.38091	0.35872	-0.33596	-0.32598	0.29475	0.27223	0.2681	0.26312	0.25834	0.25058	-0.26239	-0.24268	0.25623	-0.2453	-0.24562	-0.23948	0.25601	0.24639	0.25381	0.25175	-0.25109
			0.90779	0.74056	-0.59322	-0.54529	-0.47902	-0.41955	-0.38097	-0.35955	-0.33598	0.32603	0.29478	0.27233	0.26811	0.2633	0.25887	0.25071	-0.26267	0.24296	0.25627	0.24542	-0.24679	-0.23953	0.25639	-0.2471	-0.25381	-0.252	-0.25115
			0.90859	-0.74143	-0.59374	0.54622	0.47959	0.42011	-0.3812	0.35962	-0.33608	0.32614	-0.29478	0.27252	0.26861	0.26357	0.25896	-0.25099	-0.26285	-0.2434	-0.25648	-0.24579	0.24694	-0.24009	-0.25656	-0.24738	0.25395	0.25202	0.25134
			0.9087	0.74162	0.59576	0.54667	-0.48012	0.42032	-0.38144	-0.36125	0.33616	0.32624	-0.29504	0.2735	0.26908	-0.26358	-0.25907	-0.2513	-0.26353	0.24373	-0.25706	0.24587	0.24697	0.24025	-0.25681	-0.24739	-0.25414	-0.25207	-0.25173
			0.9089	0.74314	-0.59585	0.5474	0.48023	0.42064	0.38155	-0.36158	-0.33616	-0.32629	0.2955	0.27475	0.26946	-0.26385	0.25955	-0.25136	-0.26364	-0.24408	0.25738	0.24592	-0.24721	-0.24029	-0.257	-0.24758	-0.25423	0.25208	-0.25174
			0.90926	-0.74328	0.59586	-0.54746	0.48107	0.42106	0.38321	0.3618	0.33662	-0.32689	-0.29696	0.27476	0.26948	0.26401	-0.26016	0.25156	0.26369	-0.24408	-0.25801	-0.24595	0.24732	-0.24103	-0.25724	-0.24768	-0.25437	0.25215	0.25181
			0.90949	0.74351	0.59612	0.54947	0.48159	0.42109	0.38344	0.36297	0.33823	-0.32695	0.29699	0.27495	0.26957	0.26433	-0.26064	-0.25194	-0.26413	0.24411	-0.25821	-0.24636	-0.24791	0.24115	-0.25735	-0.24772	-0.25446	0.25228	-0.25185
			0.90964	0.7444	0.59689	-0.55	0.48188	0.42126	-0.38402	-0.36333	-0.33829	-0.32712	0.29877	0.27515	0.26979	0.2644	0.2608	0.25212	0.26434	-0.24439	-0.25865	-0.24649	-0.24803	-0.24143	0.25737	0.24795	-0.25532	-0.25268	-0.25258
			0.91061	0.74467	0.59733	-0.5504	0.48204	0.42171	0.38439	0.36378	-0.33846	0.32732	-0.29878	-0.27532	-0.26979	-0.2644	-0.26129	0.2525	0.26442	-0.24444	-0.25884	0.24672	-0.2481	0.24185	-0.25746	0.24808	-0.2557	0.25382	-0.25292
			0.91065	0.74503	0.59756	0.55068	0.48257	-0.4219	0.38525	0.36391	-0.3389	-0.3276	-0.2988	-0.27618	-0.2699	-0.26446	-0.2614	-0.25278	0.26449	-0.24545	0.25885	0.24676	0.24817	0.24199	-0.25774	-0.24835	-0.25575	0.25388	0.25321
			0.91141	0.74658	0.59834	0.55097	0.48261	-0.42244	-0.38642	-0.364	0.33971	0.32773	-0.29926	0.27654	0.27028	-0.26455	-0.26207	0.2533	-0.26453	-0.2457	0.25941	-0.24683	0.24832	0.24219	-0.25823	0.24848	-0.25609	0.2539	0.25327
			0.91372	0.74718	0.59906	-0.55203	-0.48272	0.42259	0.38709	0.36444	0.33979	-0.32773	0.29992	0.27661	-0.27062	-0.26457	-0.26222	0.25342	0.26499	0.24575	0.25982	0.24699	-0.24941	-0.24286	-0.25869	-0.2496	0.25691	0.25404	0.25387
			0.91376	0.74758	-0.59981	0.55271	0.48327	0.42404	-0.38767	-0.3652	0.33993	-0.32801	-0.30041	0.27667	0.27063	0.26471	0.26239	0.25377	-0.2652	-0.24639	-0.2603	0.24709	-0.24946	0.24294	-0.25896	-0.24975	0.25692	0.25437	-0.25422
			0.91424	-0.74856	0.60032	0.55421	-0.48345	0.42417	-0.38771	-0.36533	0.34017	-0.32984	0.30069	0.2775	0.27086	-0.26555	-0.26244	-0.2539	0.26598	0.24653	-0.2604	-0.24719	-0.24963	0.24305	-0.2592	-0.25041	-0.2575	0.25458	-0.25439
			0.91642	0.74874	0.6013	0.5551	-0.48448	-0.42427	0.3882	-0.36559	-0.34038	-0.32984	0.30097	-0.27762	-0.2711	-0.26563	-0.2626	-0.254	0.26601	-0.24665	-0.26103	-0.24756	0.24977	0.24337	-0.25958	0.25045	0.25885	0.25474	-0.25498
			0.91756	0.74923	0.60148	0.55542	0.48536	0.42461	-0.38834	-0.3658	-0.34048	-0.33165	-0.30135	-0.27773	0.27151	0.26574	0.26288	0.25412	0.26615	-0.24693	-0.26229	0.24758	0.24984	0.24364	-0.26	-0.25056	0.25911	0.25484	0.255
			0.9185	0.74947	0.60188	0.55633	0.48542	0.42497	0.38852	0.36581	0.3406	-0.33184	0.30138	0.27795	-0.27246	0.26617	-0.26341	-0.25462	0.26618	0.24714	-0.26278	-0.24798	0.25002	-0.24469	0.26134	-0.25076	0.25918	-0.25545	0.25533
			0.91907	-0.74978	0.60214	-0.55685	0.48542	0.42538	0.39015	0.36612	-0.34124	0.33185	-0.30165	-0.27799	-0.27279	-0.26618	0.26342	0.25499	0.26619	0.24733	-0.26331	-0.24815	-0.25112	0.24476	0.26147	-0.25107	0.25943	0.25637	-0.25581
			0.92038	0.75065	0.60269	0.55761	-0.48545	-0.42546	-0.39029	0.36696	-0.34187	0.33185	0.30194	-0.27811	0.27284	0.26637	-0.2636	-0.25511	0.26622	-0.24764	0.26344	-0.24816	0.25126	0.24496	0.26185	-0.25112	-0.25946	0.257	0.2559
			0.92058	0.7515	0.60361	-0.55882	-0.48555	0.42577	0.39048	0.36699	-0.34218	-0.33229	-0.30244	0.27828	-0.27323	0.26642	0.26386	-0.25537	0.26702	-0.24785	0.26348	-0.24872	-0.25132	-0.24498	0.2619	-0.25124	0.25987	0.2572	0.25604
			0.92076	0.75161	-0.60552	0.55974	0.48694	0.42635	-0.39064	0.36699	-0.34223	-0.33293	-0.30335	0.27872	-0.27402	0.26661	0.2644	-0.25556	-0.26709	0.24837	0.26355	0.24875	0.25176	-0.24512	0.26208	-0.25151	-0.26021	-0.25749	0.25667
			0.92325	0.75211	0.60661	-0.56047	0.48723	0.4268	-0.39071	0.36714	-0.34299	-0.33302	-0.30355	0.27874	0.27413	0.26665	0.26443	-0.25592	-0.26735	0.24854	0.26365	0.24879	0.25197	0.24547	0.26231	-0.25198	0.26062	0.25782	0.25693
			0.92329	0.75271	0.60662	0.56087	0.48734	-0.42687	0.39096	-0.36716	0.34302	-0.33302	0.30389	-0.27904	0.27455	-0.26671	-0.26481	0.25595	0.26737	-0.24873	0.26375	-0.24883	0.25197	0.24548	0.26248	0.25222	-0.26066	-0.25795	0.25695
			0.92362	0.75362	-0.60734	0.56176	0.48749	-0.42702	0.39096	0.36753	0.34352	-0.33329	0.30477	-0.27917	0.27498	0.26729	-0.26519	0.25595	-0.26739	0.2489	0.26385	0.24917	0.25208	0.24628	-0.2627	-0.25243	-0.26085	0.258	-0.25753
			0.92369	0.7539	-0.60876	0.56248	0.48749	-0.42789	-0.391	-0.36753	0.34368	-0.33393	-0.30533	-0.27917	0.27528	0.26781	-0.2653	0.25602	-0.26766	0.2489	-0.26406	0.24962	0.25258	-0.24648	0.26288	0.25259	0.26097	-0.25803	0.25765
			0.92378	0.75581	0.60882	0.56277	-0.48769	-0.4284	0.39136	-0.36759	0.34393	0.33411	0.30541	-0.27974	-0.27607	-0.26805	0.26545	0.25622	0.26769	0.24897	0.26428	0.2498	-0.25298	0.24663	0.26369	0.25269	-0.26155	0.25978	-0.25775
			0.92425	-0.75638	-0.60906	-0.56316	0.4882	0.429	-0.39238	-0.36797	0.3443	0.3342	0.30652	0.28058	0.27638	-0.26814	-0.26617	-0.2563	-0.26788	-0.24909	-0.26457	0.24984	-0.25314	0.24665	0.26471	-0.25349	0.26199	0.26013	0.25848
			0.92601	0.75656	0.60931	0.56345	0.4882	0.42969	0.39257	-0.36806	0.34486	0.33426	-0.30691	-0.28087	-0.27659	-0.26817	-0.26629	0.25632	0.26802	0.24944	0.26471	0.25001	-0.25334	0.24681	0.26475	-0.25361	0.26215	0.26018	-0.25874
			0.92765	0.75748	0.61025	0.56375	-0.48905	-0.43044	0.39275	-0.36809	-0.34549	-0.33454	0.30701	0.28108	-0.27787	-0.26826	-0.26643	-0.25641	0.26812	0.24973	0.26504	0.2502	-0.2534	0.24726	-0.26475	-0.25362	-0.26225	-0.26028	-0.26004
			0.92814	0.75753	0.61068	-0.56498	0.48906	-0.43053	-0.39382	-0.36829	-0.3456	0.33488	-0.30705	0.28146	0.27798	-0.26863	-0.26659	0.25697	0.26906	-0.2499	-0.26513	0.25071	-0.25372	0.24748	-0.26478	-0.25374	-0.26243	-0.26042	-0.26024
			0.92907	0.7586	0.61082	0.56552	0.48982	-0.43115	-0.3944	0.36863	0.34672	0.33554	-0.30732	0.28174	0.278	-0.26938	-0.2666	0.2576	0.26909	-0.24996	0.26601	0.25089	-0.25376	-0.24762	0.26517	-0.25374	-0.26247	-0.26046	0.2604
			0.92929	0.75941	0.61111	0.56572	-0.48996	0.43135	0.39455	0.3689	0.34678	0.33589	-0.30764	-0.2819	-0.27809	-0.26961	0.26713	0.25775	-0.26914	-0.25006	-0.26609	0.251	0.2545	0.248	-0.26549	0.25457	0.26271	-0.26047	-0.26133
			0.92954	0.76088	0.61138	0.56736	0.49032	-0.43135	0.39617	0.36993	0.34744	0.33594	0.30768	0.2822	-0.27809	-0.26993	0.26764	-0.25794	0.26948	0.25042	-0.26652	-0.2511	-0.2547	0.2483	0.26561	0.25484	-0.26353	-0.26074	-0.2618
			0.92957	0.76164	0.61185	0.56809	-0.49081	-0.43157	0.39702	0.37021	0.34772	0.33616	-0.30807	-0.28237	0.27861	0.27026	-0.26773	0.25803	-0.26954	-0.25044	0.26663	-0.25142	0.25481	0.24842	-0.26611	0.2549	0.26358	0.26085	-0.26187
			0.9301	0.76248	0.61437	0.56857	0.49198	-0.43168	-0.39702	-0.37049	0.34822	-0.33619	0.30812	-0.28315	-0.27879	0.27069	-0.26806	-0.25811	-0.2696	-0.25045	0.26678	-0.25192	-0.25481	-0.24874	0.26683	-0.25528	-0.26403	-0.26103	0.26192
			0.93191	-0.76386	0.6146	-0.569	0.49354	-0.43238	0.39851	-0.37102	-0.34914	-0.33689	0.30826	0.28351	-0.27882	-0.2712	-0.26924	0.25825	0.27005	0.25066	0.26723	-0.25291	-0.25514	-0.24879	0.26729	-0.25529	0.26412	-0.26207	0.26207
			0.93193	-0.76398	-0.61479	0.56913	0.49589	0.43283	-0.39927	0.37132	-0.34948	-0.3383	0.30886	-0.28361	0.27892	-0.27178	0.26941	-0.2596	-0.27064	0.25129	0.26785	0.25364	0.25518	0.24943	-0.26749	-0.25557	-0.26429	0.26225	0.26215
			0.93255	0.76442	0.61521	-0.56996	0.49692	0.43288	-0.3993	0.37341	-0.34956	-0.33851	0.3089	0.28366	-0.27896	0.27199	-0.27038	0.26107	0.27069	-0.2514	-0.26788	0.25412	0.2553	0.24991	-0.26886	0.25561	0.26447	0.26358	-0.26298
			0.93283	-0.76473	0.61575	-0.57125	0.49705	-0.43302	0.39946	0.37523	0.34975	-0.33857	0.30898	0.28372	-0.27902	0.27236	-0.27039	-0.26153	-0.27085	-0.2515	0.26815	-0.25425	0.25543	0.25017	0.26894	0.25596	0.26448	-0.2636	0.26321
			0.93287	0.76605	0.61615	0.57156	0.49754	0.43306	0.39957	-0.37536	0.3503	0.33871	0.3095	0.28411	-0.27919	0.27333	-0.27041	0.26186	-0.27089	0.25221	0.26867	0.25455	0.25548	0.25017	0.26926	-0.25614	-0.2646	-0.26393	0.26326
			0.93349	0.76605	0.61626	-0.57186	0.49818	0.43315	0.39974	0.37577	-0.35105	0.3389	-0.30992	0.28515	-0.2797	-0.27339	-0.27045	-0.26217	-0.27093	-0.253	-0.26883	-0.25476	0.25584	0.25025	0.27029	0.25653	-0.26469	-0.26411	0.26347
			0.93372	0.76696	0.61698	0.5726	0.49824	0.43395	0.40016	0.37598	-0.35128	0.33912	-0.31004	0.2856	-0.27977	-0.27374	-0.2708	-0.26255	0.27127	-0.25348	-0.26891	0.25507	0.25598	-0.25037	-0.27077	-0.25668	-0.26504	0.26414	-0.26369
			0.93397	0.76735	-0.61829	0.57344	0.49912	-0.43415	0.40102	0.37655	0.35168	-0.33923	0.31014	-0.28568	0.27978	-0.27444	0.27081	0.26261	-0.27128	0.25467	-0.26897	-0.25546	-0.25611	0.25056	0.27084	-0.25686	0.26517	0.26454	-0.26392
			0.93549	0.76789	0.62043	0.57365	0.49922	0.43468	0.40105	0.37669	0.35193	-0.33961	0.31028	-0.28579	0.27984	0.27452	0.27178	-0.26263	-0.27151	0.25467	-0.26914	-0.25556	0.25634	-0.25079	-0.27106	0.25715	-0.26543	-0.26471	-0.26409
			0.93599	0.76796	0.62107	0.57371	0.49926	0.43516	0.4011	0.3768	0.3527	-0.34073	-0.31066	0.28593	-0.28036	-0.27455	0.272	-0.26266	0.27167	0.25489	0.26926	0.25574	-0.25652	-0.2509	0.27136	0.25745	0.26594	-0.26487	-0.26455
			0.93615	0.76832	0.62221	0.57417	0.4997	-0.43657	0.40148	-0.37707	-0.35291	-0.34075	-0.31078	0.28627	-0.28043	0.27458	-0.27314	-0.26286	0.27293	-0.25547	-0.26948	-0.25583	0.25697	0.25134	-0.27142	0.25763	-0.26613	0.26524	0.26536
			0.93631	0.76835	0.62252	0.57556	0.4998	0.43677	0.40159	0.37868	0.35327	-0.34091	-0.31084	-0.28697	-0.28069	0.27473	0.27361	0.26342	-0.27319	-0.25581	-0.26962	-0.2566	-0.25732	0.25138	-0.27167	0.25798	0.26683	-0.26546	-0.26601
			0.93693	0.76855	0.62277	-0.5757	0.50036	-0.43742	-0.40181	-0.37907	-0.35386	-0.34103	0.31113	-0.28747	0.28082	0.2749	0.27362	-0.26348	0.27341	-0.25602	0.26977	0.25685	0.25766	0.25138	0.27203	0.25833	0.26687	0.26553	0.2663
			0.93731	0.76934	0.62314	0.57572	0.50099	0.43788	-0.40201	0.37909	-0.35394	-0.34127	-0.31113	-0.28752	-0.28083	0.27552	0.27389	0.26435	-0.27347	-0.25653	-0.2698	0.25696	-0.258	0.25139	0.27247	-0.2586	0.26733	-0.2657	-0.2664
			0.9379	0.76971	-0.62443	0.57573	-0.5024	-0.43815	0.40363	-0.37998	0.35461	0.34322	0.31119	-0.28774	0.28096	-0.27553	0.27398	-0.2652	-0.27363	-0.25666	0.26986	0.25763	0.25839	-0.25156	0.27274	-0.25893	-0.26757	0.26572	0.26658
			0.93852	0.76987	-0.62561	-0.57637	-0.50392	0.43833	-0.40426	0.38057	0.35487	0.34333	0.31157	0.28842	-0.28157	-0.27601	-0.27403	0.26525	0.27372	-0.25682	0.27023	0.25788	-0.25875	0.25174	0.27289	-0.25906	-0.26776	-0.26586	-0.26666
			0.93898	-0.77158	0.62573	0.57677	-0.50411	-0.43847	0.40437	0.38058	0.35553	0.34348	0.31192	0.28855	0.2819	0.27617	-0.27404	0.26531	0.27425	-0.2572	-0.2714	0.2581	-0.25878	0.25192	-0.27335	0.25911	-0.26785	-0.266	0.26667
			0.93901	0.77202	0.62648	0.57688	-0.50424	0.43887	0.40544	0.38162	0.35599	-0.34363	0.31198	-0.28883	-0.28198	-0.27642	0.27552	-0.26533	0.27515	-0.25753	-0.27153	-0.25818	-0.25917	-0.25211	0.27337	0.25931	-0.26809	-0.26613	-0.26677
			0.93956	0.77365	0.62743	0.57726	0.50444	0.43926	-0.40613	0.38228	0.35615	0.3439	0.31211	0.28889	0.28206	-0.27711	-0.27558	-0.26558	0.27538	-0.25769	-0.27164	-0.25839	-0.25919	-0.25354	0.27337	-0.25959	-0.26883	-0.2663	0.26718
			0.9402	0.77385	0.62771	0.5788	0.50502	0.43972	-0.40657	-0.38289	0.35644	-0.34573	-0.31292	-0.28891	0.28211	-0.27742	-0.27562	-0.26583	0.27554	-0.25858	0.27168	0.25856	-0.25926	0.25406	0.27345	-0.25988	0.26917	-0.26667	0.26733
			0.94081	0.77393	0.62789	0.57925	-0.50533	-0.4403	-0.40691	-0.38296	-0.35671	0.34594	0.31322	-0.28896	-0.28231	-0.27792	-0.27592	-0.26584	-0.27606	-0.25985	-0.27247	-0.25862	0.25935	-0.25411	-0.27456	-0.26047	0.2692	0.26778	-0.2675
			0.94085	0.77442	0.62803	-0.57932	0.50686	0.44071	0.40729	0.38302	-0.35682	0.34606	-0.31343	-0.28898	0.28379	0.27835	-0.27606	0.26604	-0.2765	0.26021	0.27259	0.25927	-0.26062	-0.25485	0.27502	-0.2605	0.2692	0.2678	0.26757
			0.94242	0.77461	0.62856	0.57957	-0.50697	-0.4425	0.40794	-0.38304	0.35834	-0.34614	-0.31375	-0.28907	0.28395	0.27836	0.27615	0.26613	0.27851	0.2607	-0.27269	0.25928	0.26064	-0.25492	0.27503	-0.26065	-0.26974	0.26796	-0.26772
			0.94268	0.77478	0.62892	-0.58039	-0.50743	0.44329	-0.40818	0.38345	0.35859	-0.34654	0.31383	0.29001	-0.2842	0.27944	-0.27647	0.26621	0.27854	-0.26115	-0.27276	0.25959	-0.26085	0.25507	0.27548	0.2607	-0.27003	-0.26857	-0.26783
			0.94357	0.77485	-0.6294	0.58066	0.50809	-0.44333	-0.40881	0.38351	-0.3587	-0.34725	-0.31395	0.29108	-0.28433	-0.27944	-0.277	0.26648	0.27865	0.26171	0.27313	-0.26023	-0.26106	-0.25528	0.27569	-0.26109	-0.27034	-0.26879	-0.26806
			0.9459	0.77502	0.63049	0.58139	-0.50958	0.44413	0.40939	0.38366	-0.35893	0.34796	0.31399	-0.2918	0.2846	-0.27969	-0.27709	-0.26725	0.2787	-0.26175	0.2733	0.26025	-0.26123	-0.25596	0.27576	-0.26137	-0.2708	-0.26886	0.26838
			0.94729	0.77534	0.63061	0.58376	0.50969	0.4449	0.40953	0.3838	0.35913	-0.34894	-0.31463	-0.29231	0.28543	0.27996	0.27714	0.26726	-0.27872	-0.26197	0.27369	0.26026	-0.2613	-0.25606	-0.27605	-0.26158	-0.27094	0.27023	0.26946
			0.95335	0.77551	0.63096	0.58418	0.50982	0.44509	-0.40962	0.3843	-0.35936	-0.34941	0.31515	-0.29243	0.28561	-0.2803	-0.27751	-0.26727	0.27897	0.26215	-0.27392	-0.26068	0.26161	-0.25607	-0.27645	0.26159	0.27208	-0.27045	0.26964
			0.95364	0.77617	-0.63116	0.5843	0.51191	0.44512	-0.4111	0.38431	0.35941	0.34975	0.31526	-0.29258	-0.28609	-0.28033	0.27794	-0.26737	-0.27925	-0.26234	0.27397	0.26147	0.26164	0.25643	-0.27705	-0.2618	-0.27243	-0.27053	0.27002
			0.95403	0.7763	0.63196	0.58474	0.51203	-0.44552	-0.41127	0.38479	0.35999	0.35069	-0.31567	0.29259	-0.28663	-0.28077	-0.27842	-0.26737	-0.27926	0.26273	0.27494	-0.26182	0.26224	-0.25655	0.27737	0.26193	-0.27271	0.27087	-0.27046
			0.9553	0.7772	0.63233	-0.58537	0.51292	0.44626	0.41205	0.38506	0.36027	0.35075	0.31593	-0.29269	-0.28723	0.28117	-0.27849	0.2675	0.27984	0.2629	-0.27496	-0.26194	-0.26305	-0.25655	0.27766	-0.2621	0.27283	0.27091	-0.27052
			0.95631	0.77733	0.63238	-0.58592	0.5132	0.44632	-0.41254	-0.38544	-0.3605	-0.3508	0.3161	-0.29319	-0.28771	0.28154	-0.27974	-0.26926	-0.27987	-0.26357	-0.2752	0.26301	0.26317	-0.25668	0.27767	0.26212	-0.27287	-0.271	0.27074
			0.95686	0.77753	-0.63321	0.58737	0.51339	0.44656	0.41282	-0.3863	-0.36081	0.35132	-0.31635	0.29374	0.28826	0.28163	-0.27975	-0.2693	-0.28103	-0.2644	0.2758	-0.26427	0.26326	0.25713	-0.2789	-0.26217	0.27364	0.27182	0.27131
			-0.95807	0.7781	0.6335	0.58776	-0.51343	-0.44669	0.41282	-0.38645	-0.36114	0.35154	0.31704	0.2938	-0.28854	-0.28176	-0.2801	0.27012	-0.28105	-0.26445	0.27615	0.2644	-0.26326	0.25719	-0.27908	0.26289	-0.27392	0.27191	-0.27208
			0.95879	0.77918	0.63412	0.58889	0.51457	-0.44861	0.41282	-0.38664	0.36126	0.35159	-0.31726	-0.29506	0.28957	0.28201	0.28059	-0.27061	0.28121	0.26449	-0.27635	0.26447	-0.26332	0.25737	-0.27924	-0.26309	0.2749	-0.27203	0.27254
			0.96206	0.77924	0.6346	0.58948	0.5146	0.44873	0.41343	-0.38696	0.36138	0.35163	0.31789	0.29518	0.28982	0.28252	0.28087	-0.2708	-0.28154	0.26501	0.27668	-0.26464	0.26371	0.25782	-0.27965	-0.2634	0.27533	0.27209	0.27258
			0.96572	0.77956	-0.6347	0.5897	-0.51505	0.44913	-0.414	-0.38711	0.36143	-0.35187	-0.31795	0.2959	0.28991	0.28344	0.28122	0.2712	-0.28188	-0.26548	0.27675	-0.26489	-0.26432	0.25805	-0.27974	0.26341	0.27567	0.2725	0.27279
			0.96581	0.77969	0.637	-0.58995	-0.51551	0.45031	0.41417	0.38749	-0.36175	0.35231	-0.31823	-0.29593	-0.29008	-0.28367	-0.28287	0.27175	0.282	0.26549	-0.27727	0.26506	0.26623	0.25806	0.27977	-0.26344	-0.27593	-0.27434	0.27319
			0.96912	0.77991	0.63717	0.59095	-0.51552	0.45109	-0.41457	0.38761	0.36181	0.35284	0.3183	-0.29671	0.29021	-0.28369	-0.28304	-0.27187	0.28259	-0.26567	-0.27732	0.2653	0.26624	0.25835	0.27982	0.26426	0.27595	-0.2746	0.27329
			0.96986	0.78248	-0.63765	-0.5915	-0.51558	-0.45121	-0.41525	0.38799	-0.36185	0.35335	-0.31862	0.29706	0.29053	0.28393	-0.28311	0.27217	-0.28261	0.26572	-0.27763	-0.26558	0.26636	-0.25843	-0.28023	0.26452	0.27607	0.27473	0.2733
			0.97026	0.78278	0.63766	-0.59167	-0.5163	0.45122	0.41527	0.38808	0.36239	0.35338	-0.31884	-0.29735	0.29056	-0.2847	0.28346	-0.2722	-0.28317	-0.26616	0.27825	0.26587	0.26639	0.25846	-0.28061	0.26462	-0.27646	0.27495	-0.27348
			0.97455	0.78298	0.6383	0.59253	-0.51631	0.45223	0.4154	-0.38821	-0.36304	-0.35387	0.31914	0.29744	0.29071	0.28481	0.28363	0.27261	-0.28324	0.26633	-0.27849	-0.26635	0.26664	0.25847	0.28069	0.26465	-0.27682	0.2751	0.27406
			0.97831	0.78377	0.63885	0.5933	0.5169	0.45273	-0.41715	0.38849	-0.36307	-0.35598	0.31921	0.29758	0.29085	-0.28618	0.28426	0.27264	0.28326	-0.26703	-0.27857	-0.26681	-0.26694	-0.2599	0.28077	-0.26478	0.27729	-0.27515	0.2741
			0.98097	0.78428	-0.64071	0.59363	0.51741	0.45276	-0.41715	-0.38877	-0.36394	-0.35618	0.31998	0.29765	0.29104	0.28625	0.28437	-0.27276	-0.2833	0.26711	0.27884	0.2671	-0.26698	-0.26006	0.28082	-0.26518	-0.27759	-0.27515	0.27418
			0.98125	0.78561	0.64072	0.59394	0.51831	0.4529	0.41729	0.38893	0.36434	-0.35671	0.31999	-0.29815	0.29107	-0.28653	0.28486	-0.27288	-0.28334	0.26722	-0.27899	0.26746	-0.26719	0.26033	-0.28114	0.26572	-0.27827	-0.27519	0.27425
			0.98376	0.78562	0.64101	0.59502	-0.51928	0.45297	0.41732	-0.38904	0.36502	-0.35688	-0.32025	-0.29893	-0.29135	0.28664	0.28547	0.2737	-0.28409	-0.26854	0.27922	-0.26757	-0.26728	0.26048	0.28123	-0.26575	0.27833	0.27543	0.27426
			0.98468	0.7864	0.64241	0.59515	0.51956	-0.45375	0.41774	0.38941	-0.36556	0.35691	0.32061	0.299	0.29148	-0.28709	0.2857	0.27438	0.28446	-0.26869	-0.27924	0.26836	0.26765	-0.26048	0.28185	-0.26607	-0.27891	-0.27547	0.27449
			0.98619	0.78681	0.64258	0.59525	0.51999	0.45388	0.4179	-0.38947	0.36559	-0.35774	-0.32081	-0.2991	0.2921	0.28734	0.2857	-0.27491	-0.28459	-0.26896	-0.27972	0.27016	-0.268	0.26058	0.28205	0.26663	-0.27909	-0.27596	0.27469
			0.98747	0.78696	0.64398	0.59528	0.52009	-0.4542	0.41813	0.38968	0.36569	-0.35978	0.32097	-0.29912	0.29249	0.28853	0.28593	-0.27529	0.28472	-0.26939	-0.2799	-0.27017	0.26867	0.26106	-0.28248	0.26665	0.27931	0.27605	0.27479
			0.98986	0.78774	0.64398	-0.59547	0.521	0.45441	-0.41816	0.39002	-0.36606	-0.35984	0.32189	-0.29954	0.29298	0.2889	-0.28617	0.27558	-0.28475	-0.26979	0.27994	0.27022	-0.26889	-0.26119	-0.28303	-0.26693	-0.27948	-0.27658	0.27486
			0.99274	0.78819	0.64402	0.59553	0.52154	-0.45451	0.41818	0.39011	0.36637	-0.36001	-0.32235	0.30001	-0.29311	0.28895	0.2862	-0.2756	-0.28482	0.27002	0.28008	-0.27131	0.26898	0.26149	0.28304	-0.26698	-0.27948	-0.27728	-0.27505
			0.99288	0.78871	0.6445	0.59602	0.52168	0.45476	-0.41886	-0.39056	0.36667	0.36062	-0.32271	-0.30024	-0.29349	0.28991	0.28643	-0.27568	0.28497	0.27003	0.28026	-0.27185	0.26923	-0.26179	0.28398	0.26719	0.27987	-0.27731	0.27603
			0.99421	-0.78877	0.64501	-0.59626	0.5219	-0.45497	0.41916	0.39152	-0.36712	0.36232	0.32276	0.30032	0.29369	-0.29044	0.28666	0.2759	0.28529	-0.27012	-0.28027	0.27234	0.26926	-0.26202	-0.2843	0.26757	-0.27987	-0.27745	0.27627
				0.79027	0.64574	-0.59706	0.52222	0.45501	-0.41976	-0.3918	0.36737	0.36295	-0.32297	-0.30106	-0.2937	-0.29062	0.28675	-0.27593	0.28533	0.27041	0.2815	0.2726	-0.2695	-0.26239	-0.28461	0.26781	-0.28001	0.27785	0.27627
				0.7903	0.64675	0.59739	0.52233	0.45506	0.42029	-0.39199	0.36759	-0.36301	0.32324	0.30135	0.29394	0.29067	0.28763	0.27607	0.28586	0.27042	-0.28155	0.27263	-0.2698	-0.26314	-0.28492	0.2682	-0.28017	0.278	0.27631
				0.79051	0.64758	0.59809	0.52247	0.45523	0.42035	0.39243	-0.36762	0.36309	0.32329	0.30138	-0.29414	0.29067	-0.28859	0.27644	-0.28602	-0.27043	-0.28209	-0.27264	-0.27043	0.26331	0.28506	-0.26908	-0.28028	-0.27804	-0.27697
				0.79132	-0.64976	0.59839	-0.52252	0.45591	-0.42057	-0.39245	-0.36778	0.36339	0.32333	0.30167	0.2942	0.29096	-0.28879	0.27703	-0.28625	-0.27049	0.28245	-0.27282	-0.27072	0.26338	0.28601	0.2691	-0.2806	0.27827	0.27707
				0.79168	0.65023	0.59863	-0.52263	0.456	0.42104	-0.39256	0.3683	-0.3641	0.32435	-0.30171	0.29533	-0.29128	-0.2894	0.2776	-0.28747	-0.27066	-0.28245	-0.27284	0.2709	0.2637	0.28626	-0.26972	0.28092	0.27832	-0.27727
				0.79236	0.65161	-0.59984	0.52278	0.45664	-0.42106	-0.3931	-0.36842	-0.36435	0.32487	0.30174	-0.29551	0.2917	0.28964	-0.27792	0.28775	-0.27073	0.28293	0.27361	-0.27123	-0.26399	-0.28629	0.26982	-0.28104	-0.27861	-0.27772
				-0.79237	0.65227	-0.60043	-0.52319	0.45703	0.42173	0.39331	-0.36908	0.36439	0.32505	-0.30246	0.29576	-0.29172	0.29016	0.27854	-0.28781	-0.27083	0.28294	-0.27413	-0.27201	0.26418	-0.28636	-0.27049	0.28124	-0.27889	0.27781
				0.79275	0.6534	0.60068	-0.52399	0.45704	-0.42174	-0.39344	-0.36919	0.36441	0.32506	0.30313	-0.29614	0.2919	-0.29023	0.27867	-0.28785	0.27093	0.28297	0.27415	0.27218	0.26455	-0.28638	-0.27049	-0.28149	0.27906	0.27791
				0.79303	0.65352	0.60087	0.52437	0.45705	0.422	-0.39405	0.3694	-0.36464	0.32513	0.30366	0.29631	-0.2919	-0.29042	0.27886	-0.28812	-0.27157	0.28315	0.27457	-0.27224	-0.26467	0.28647	-0.27111	-0.28195	-0.27913	-0.27886
				0.79311	0.65394	-0.60113	-0.52481	0.4574	-0.42222	0.39414	0.36962	-0.36481	-0.32533	0.30439	-0.29641	0.29267	0.29045	-0.27893	0.28813	0.2719	-0.28324	0.2747	-0.27259	0.26483	0.28681	0.27135	-0.28207	0.27918	0.279
				0.7936	0.65402	-0.60194	-0.52505	0.45748	0.42229	-0.39519	0.36976	0.36623	0.32587	0.30504	-0.29675	-0.29282	0.2908	-0.27922	-0.28852	-0.2719	0.28352	-0.27473	0.27272	0.26484	-0.28704	-0.27148	0.28211	0.2794	-0.27907
				-0.79548	-0.65443	0.60204	-0.52607	-0.458	0.42245	-0.39581	0.37012	0.36654	-0.32607	0.30538	-0.29685	-0.29372	-0.29121	-0.27924	-0.28942	0.27216	-0.28423	-0.27513	0.27306	-0.26565	0.2871	-0.27202	0.28219	0.27941	0.27918
				0.79563	0.6546	-0.60356	0.52685	0.45821	0.42442	0.39599	0.37069	0.36723	0.32666	-0.30598	-0.2969	-0.29389	0.29136	-0.27926	0.29009	-0.27226	-0.28439	0.27604	-0.27319	0.26575	-0.28715	-0.2723	-0.28277	-0.27975	-0.2792
				0.79571	0.65647	-0.60416	0.52721	-0.45837	0.42447	0.39648	-0.37072	-0.36747	0.32667	-0.3066	0.29747	0.29403	0.29173	-0.27949	0.29041	-0.27246	0.28445	0.27609	-0.27319	0.26579	-0.28716	0.27236	-0.28294	-0.2798	-0.27921
				0.79669	0.6581	0.60476	-0.52807	-0.45868	0.42512	-0.39678	0.37075	0.36752	0.32742	0.30706	-0.29761	-0.2942	-0.29212	0.27978	-0.29061	0.2734	-0.28447	-0.27612	-0.27351	-0.26632	-0.28753	0.27297	-0.28388	0.28004	-0.27928
				0.79739	0.65901	0.60493	0.52987	-0.45887	-0.42573	-0.3968	-0.37159	0.36773	-0.32757	-0.30743	0.29823	-0.29463	0.29233	0.28021	-0.29147	-0.27366	0.28463	0.27687	0.2736	-0.26654	0.28756	-0.27367	-0.28391	-0.28057	0.27929
				0.79866	0.65937	-0.6053	-0.52995	-0.45942	0.42637	0.39721	-0.37187	-0.36833	0.32786	0.3079	0.29827	-0.29559	-0.29264	0.28029	-0.29178	0.27411	-0.2849	-0.2769	0.27397	-0.26657	-0.28771	-0.27368	-0.28408	0.28074	-0.27984
				0.8012	0.66107	0.60548	0.53002	0.45977	0.42652	-0.39732	-0.37189	-0.36926	-0.32828	-0.30812	-0.29957	-0.29637	-0.29266	-0.28053	0.2918	-0.27426	-0.28523	0.27711	0.27479	-0.26682	-0.28793	-0.27378	0.28414	-0.28173	0.28007
				0.80199	0.6619	-0.6061	-0.53039	0.46014	0.42734	-0.39763	-0.37274	0.36942	0.32849	0.30834	0.29981	-0.29679	0.29299	-0.28068	-0.29189	0.27435	0.28552	-0.27729	0.27503	-0.26686	-0.2883	-0.27388	0.28419	-0.28189	-0.2803
				0.80258	0.6631	0.60613	0.53237	-0.46067	-0.42813	0.39769	0.37279	-0.3699	0.32853	-0.30848	0.30038	0.29691	0.29406	-0.2807	-0.29202	-0.27472	-0.28554	-0.27734	0.27547	0.267	0.28831	-0.27443	0.2842	0.28225	-0.2805
				0.8028	0.66436	-0.60672	0.53246	0.46108	0.42846	0.3981	-0.37296	-0.3699	-0.32867	-0.30909	-0.3004	-0.29714	0.29472	0.28076	-0.29203	0.27477	0.28627	-0.27741	0.27555	-0.26713	-0.28839	0.27488	-0.28426	-0.28261	-0.28129
				0.80303	-0.665	-0.60719	0.53251	0.4613	-0.42872	-0.39912	0.3733	-0.37008	0.32914	0.30927	0.30092	-0.29726	-0.2952	-0.28106	0.29221	-0.27534	-0.28675	0.27763	-0.27561	-0.26718	0.28874	-0.27511	-0.28433	0.28279	0.28172
				0.80387	0.66587	0.6072	0.53344	-0.46214	-0.42884	-0.39941	0.37384	0.3702	-0.32964	-0.31004	-0.30112	-0.2974	0.29538	-0.28132	0.29349	-0.27574	-0.28681	0.27788	0.27563	-0.26727	-0.28907	0.27596	-0.28436	0.283	0.28174
				0.8039	0.66747	0.60763	0.53385	0.46227	0.42909	0.39963	-0.37427	0.37141	0.33072	0.31056	-0.3013	0.2977	0.29547	-0.28132	-0.29358	-0.27576	0.28729	-0.27792	-0.27604	-0.26774	0.28912	0.27625	0.28493	0.28358	0.28188
				0.80481	0.66793	0.60772	-0.53437	-0.46275	-0.43015	0.39972	0.37432	0.37167	-0.33076	-0.31056	-0.30194	-0.29782	0.29547	-0.28143	-0.2941	-0.27584	0.28813	0.27809	0.27613	0.26776	0.28914	-0.27641	-0.285	-0.28394	0.28208
				0.80499	0.66923	0.6079	0.53475	0.463	0.43027	0.40017	0.37475	0.37202	-0.3313	-0.31081	0.302	-0.29802	0.29585	-0.28266	-0.29477	0.27602	-0.28814	-0.2782	0.27629	-0.26782	-0.28925	-0.27662	-0.2852	-0.28413	0.28406
				0.80507	0.66928	0.60859	0.53482	-0.46309	0.43057	0.40029	-0.37501	-0.37211	0.33203	-0.31095	0.30217	0.29812	-0.2967	0.28324	-0.29486	-0.27625	0.28824	0.27829	-0.27629	-0.26837	-0.29006	-0.27692	0.28544	-0.2842	0.28409
				0.80513	-0.66997	0.60914	0.53521	0.46311	0.4307	0.40049	0.37532	0.37234	0.33224	-0.31102	0.30243	0.29836	0.29676	-0.28366	0.29492	0.27649	-0.28875	0.27838	-0.2767	-0.26884	-0.29044	-0.2776	-0.28547	0.28445	-0.28425
				0.80601	0.67158	-0.60963	-0.53556	-0.46311	0.43084	-0.40073	0.37561	0.3726	0.33286	0.31103	-0.30266	-0.29853	-0.29703	-0.28458	0.29507	0.277	0.28878	-0.27847	0.27712	-0.26995	-0.29083	-0.27795	0.28569	0.28477	-0.28506
				0.80671	0.67185	0.60974	0.53593	0.46401	0.43095	0.40111	-0.37635	-0.37278	0.33326	0.31157	-0.30297	0.29871	0.29766	0.28464	0.29509	-0.27742	-0.28927	0.2786	0.2772	0.27022	0.29116	0.27803	0.28599	0.28492	0.28617
				0.80729	0.67299	-0.61042	0.53604	-0.46505	0.43099	-0.40156	0.37692	-0.37298	-0.3335	-0.31165	0.303	-0.29906	-0.29772	-0.28495	-0.29515	0.27749	0.28972	0.27864	0.2775	0.27058	0.29124	-0.27816	-0.28609	0.28495	-0.2864
				0.80758	0.67582	0.61151	0.53608	0.46565	0.43116	0.40269	-0.37708	0.37308	0.33383	0.31171	0.30358	0.2991	0.29807	0.28523	-0.29524	-0.27796	-0.29012	0.27868	-0.27762	0.27123	-0.29143	0.27818	-0.2863	0.28563	0.28672
				0.80796	0.67776	0.6125	0.53639	-0.46647	0.43125	0.40321	-0.3774	0.37333	-0.33386	0.31196	-0.30366	0.29986	-0.29824	-0.2853	-0.2955	-0.27801	-0.29048	0.2789	0.278	-0.27123	-0.29146	-0.27826	-0.28657	-0.2858	0.28673
				0.80836	0.67805	0.61274	0.53663	-0.46651	0.43131	-0.40374	0.37784	0.37341	-0.33406	0.31322	0.30411	-0.3	-0.2984	0.28535	0.29562	0.27811	-0.29067	-0.27913	-0.27809	-0.27228	0.29169	0.27856	0.28669	-0.28587	-0.28713
				0.80897	0.67837	0.61298	-0.5367	0.4672	-0.43144	0.40409	-0.37831	0.37371	-0.33465	0.31323	0.30424	0.30005	0.2989	0.28599	-0.29614	-0.27828	-0.29147	-0.27916	0.2783	0.2724	0.2919	-0.27864	-0.2867	-0.286	0.2874
				0.80961	0.6784	0.61359	0.53688	0.4673	-0.43163	-0.40473	0.37927	0.37398	-0.33488	0.314	0.30477	0.30007	0.29926	0.28601	0.29646	-0.27829	-0.29182	-0.27934	0.2785	-0.27244	-0.29209	0.27866	0.28676	-0.28607	0.28748
				0.80977	0.6795	0.61511	0.53811	0.46733	-0.43183	-0.40492	0.3794	0.37406	0.33503	0.31424	-0.30612	0.30047	-0.29926	0.28604	0.29675	0.27835	0.29202	0.28035	-0.27851	-0.27244	-0.29235	0.27899	-0.28694	-0.28622	-0.28769
				0.8101	0.67965	0.61609	0.53956	-0.46754	0.43285	0.40578	-0.3795	0.37448	0.3351	-0.31424	0.3067	-0.30052	-0.29944	-0.28629	-0.2971	0.27868	-0.29215	-0.28044	0.27858	-0.27343	-0.29283	-0.27963	0.28705	0.28626	0.28805
				0.81035	0.67965	-0.61738	0.53988	0.46779	-0.4331	-0.40598	-0.38011	0.3752	-0.33529	-0.31494	0.30725	0.30103	0.29995	0.2863	-0.29713	-0.27934	-0.2923	0.2808	0.27867	-0.27359	0.2941	0.27996	0.28705	-0.28632	0.28857
				0.81241	0.67989	0.6174	-0.5401	0.46798	0.43518	0.40624	-0.38046	-0.37544	0.33574	0.31498	0.30726	0.30105	-0.30009	0.28666	-0.29733	0.27938	0.29258	-0.28094	0.27903	-0.27382	-0.2941	-0.27997	0.28718	0.28633	0.28866
				0.81242	-0.68006	0.61769	0.54101	0.46821	0.43536	0.40628	0.38089	-0.37603	-0.33594	-0.31553	-0.3073	-0.30131	0.30136	0.28731	0.29741	0.27942	-0.29271	0.28117	0.27906	-0.27382	-0.29413	-0.28002	0.28737	0.28654	0.2887
				0.81283	-0.68245	0.61806	0.54224	0.46822	0.4356	-0.40636	0.38102	0.37657	0.33604	0.31586	0.30835	0.30136	0.30178	-0.28774	0.29832	0.27955	0.29298	-0.28139	-0.27969	0.274	-0.29449	-0.28067	0.2875	0.28673	0.28876
				0.81306	0.68318	0.61812	-0.54278	-0.46918	-0.43626	-0.40698	0.38116	0.377	-0.33642	-0.31659	0.30856	0.30187	0.3024	0.28776	0.29871	-0.27961	-0.29305	0.28191	0.27975	0.27421	-0.29464	0.28091	0.28758	-0.28677	-0.28907
				0.81391	0.68367	-0.62369	0.54279	-0.46946	-0.43775	0.40752	0.38156	-0.37702	-0.33645	-0.31707	-0.30863	-0.302	0.30274	-0.28802	-0.2988	-0.27997	0.29326	0.28197	-0.28056	-0.27446	0.29509	-0.28133	0.2877	-0.28703	0.28927
				-0.81396	0.68464	0.6239	-0.5428	0.46954	0.43842	0.40762	0.3818	-0.3771	-0.33711	0.31765	-0.30877	-0.30233	0.3031	0.28894	0.29902	-0.28015	-0.29327	-0.28199	0.28071	-0.27461	-0.29537	-0.28139	-0.28819	0.28715	0.2895
				0.81533	0.68556	-0.62432	0.54474	0.46965	0.43933	0.40833	0.38245	0.37774	0.33723	0.31772	-0.3098	0.30239	-0.30338	0.28897	0.29923	-0.28044	0.29336	0.28387	0.28072	-0.27472	-0.2957	-0.28141	-0.28912	0.28728	-0.28987
				0.8156	0.68694	0.62471	0.54576	0.47063	0.43938	0.40848	0.38315	0.37802	-0.33729	-0.31777	-0.31061	-0.30245	0.3035	0.28901	0.29948	-0.28054	0.29341	0.28448	0.28087	0.2757	0.29587	0.28216	0.2895	-0.28825	0.28991
				0.81624	0.68893	-0.62494	-0.5458	0.47235	0.4403	-0.40853	-0.38322	0.37802	0.33739	-0.31783	-0.31101	0.30273	-0.30388	0.28942	0.29952	0.28096	0.29376	-0.28448	-0.28097	-0.2758	0.2967	-0.28244	-0.28958	-0.28857	0.29008
				0.81626	0.69073	0.62502	0.54581	0.47301	-0.4404	-0.4087	0.38383	0.37806	0.33811	0.31826	0.31109	-0.30289	-0.30438	-0.28946	-0.30042	-0.28101	0.29413	-0.2845	0.28108	-0.27598	-0.29681	0.28246	0.28965	0.2887	-0.29025
				0.81648	0.69076	0.62522	0.54629	-0.47321	0.44085	0.40991	0.38396	0.37842	0.33844	-0.31883	0.31127	-0.30306	-0.30451	0.28963	0.30088	0.28154	-0.29444	-0.28499	0.28125	0.27655	0.29682	-0.28259	0.29008	-0.28873	-0.29035
				0.81821	0.69131	0.626	0.54709	0.47325	0.44106	0.41026	-0.38402	0.37844	0.33845	-0.31912	-0.31178	0.30344	-0.30453	0.28963	-0.30089	-0.2816	0.29458	0.28569	0.2815	-0.27657	0.29686	-0.28259	-0.29009	-0.2889	0.29038
				-0.81863	0.69213	0.62698	-0.54712	0.47398	0.44114	-0.41044	0.38436	0.37848	-0.33888	0.31957	-0.31197	0.30424	0.30505	-0.2898	-0.30104	0.28181	-0.29478	0.28576	0.28177	-0.27675	0.2973	-0.28263	-0.2908	0.28925	-0.29046
				0.81865	-0.69279	0.62762	0.54721	0.47453	-0.44126	0.41069	-0.38472	0.3785	-0.33907	0.31972	-0.31203	-0.30424	-0.30536	-0.29043	-0.30106	-0.28198	0.29491	-0.28728	0.282	-0.27699	-0.2982	-0.28265	0.29102	-0.2898	-0.29188
				0.81963	0.69363	0.62794	0.54753	0.47549	0.44145	0.41083	0.385	-0.37853	0.33956	-0.31985	0.31204	0.30447	0.30671	-0.29044	0.3012	-0.28199	-0.29497	-0.28786	-0.28208	-0.27739	-0.29914	0.28275	0.29107	-0.29004	-0.29195
				0.8198	0.69453	0.62883	-0.54782	0.47631	0.44226	0.41135	-0.38547	0.37858	0.34047	-0.32057	0.31255	-0.30486	0.30695	-0.29047	-0.3013	0.28217	-0.29504	0.28815	0.28212	-0.27746	0.29924	0.28323	0.2911	0.29007	-0.2922
				0.81981	0.69473	-0.62921	0.54798	0.47665	-0.44239	0.41268	0.38576	0.37869	-0.34052	0.32078	-0.31255	0.30603	0.30697	-0.29076	0.30137	-0.283	0.2951	0.28817	0.2822	0.27752	-0.29938	0.28325	0.29112	0.29013	-0.2924
				0.82017	0.69579	0.62937	-0.54806	0.47674	-0.4426	0.41457	-0.38583	0.37968	-0.34117	0.3211	0.31265	-0.30621	0.30708	-0.29098	0.30148	0.28304	-0.29544	0.28824	-0.2823	-0.27768	-0.29944	-0.28332	-0.29114	0.29042	-0.29252
				0.82179	0.69639	0.63067	-0.54887	0.47691	0.44306	-0.41488	0.38586	0.38005	0.34199	0.32143	0.31374	0.30677	0.30721	-0.29119	0.30152	0.28331	-0.29555	-0.28844	0.28235	-0.27776	-0.29963	-0.28335	-0.29122	0.2912	-0.29252
				0.82514	0.69658	0.6324	0.54894	0.47872	0.44315	0.4152	0.38733	0.3817	-0.34208	-0.32199	-0.31414	-0.30682	-0.3075	0.29128	-0.30217	-0.2837	0.29594	0.28895	-0.28272	-0.2781	-0.29982	0.2837	0.29128	-0.29129	0.29273
				0.82558	0.69707	-0.6326	-0.54907	0.47877	-0.44349	-0.41573	0.3874	0.38177	-0.34246	0.32207	-0.31476	0.30723	-0.30791	-0.29189	-0.3025	0.28412	-0.29608	-0.29003	-0.28273	-0.2781	-0.30047	-0.28405	0.29213	-0.29198	0.29303
				0.82581	0.69744	-0.63448	0.55003	0.47877	0.4444	0.41594	0.38752	0.3819	-0.34261	-0.32262	0.31504	-0.30807	0.30843	-0.292	0.30254	0.28423	0.2961	0.29133	0.28283	-0.27843	0.30058	-0.28423	-0.29233	-0.29237	-0.29351
				0.82721	0.69769	0.63505	0.55031	0.47945	0.44452	0.41605	0.38866	0.38195	-0.34266	0.32432	0.31518	0.30986	0.30844	0.29225	0.30289	0.2843	0.2962	-0.29152	-0.2831	0.27865	0.30104	0.28478	0.29259	-0.29244	-0.29379
				0.82814	0.69854	0.63529	0.5505	0.47978	0.44476	-0.41664	0.39005	-0.38261	0.343	0.32458	-0.31534	0.31008	0.30856	0.29239	0.30293	0.28437	0.29647	0.29175	0.28325	0.27894	0.3015	0.28545	-0.29277	-0.29268	0.29399
				-0.82861	0.69858	-0.63562	0.5505	0.47998	0.44503	0.41759	-0.39023	0.38266	0.34419	0.32466	-0.31536	-0.31063	0.3087	-0.29247	0.30297	-0.28451	-0.2969	0.29188	0.28354	-0.2792	-0.30184	0.28588	-0.29284	0.29285	0.29458
				0.82902	0.69862	-0.63598	0.55124	-0.48007	-0.44635	-0.41818	0.3903	-0.38269	0.3442	0.32475	-0.3162	-0.31237	0.30911	0.29342	-0.30336	-0.28482	0.29759	0.29226	0.28357	0.27921	-0.30188	0.28628	-0.29326	0.29304	-0.29462
				0.83044	0.69923	0.63618	-0.55135	0.48051	0.44637	0.41833	0.39061	0.38277	-0.34441	-0.32513	0.31679	-0.31279	-0.30912	-0.29342	-0.30338	0.28569	0.29778	0.2924	-0.28396	-0.27928	0.30194	0.2868	-0.29327	-0.29312	0.29518
				0.83141	0.70086	0.6362	0.55241	0.48052	0.44671	0.4191	-0.39063	0.38287	-0.34475	-0.32554	0.31701	-0.31292	0.30941	0.29359	0.30377	0.28601	-0.29778	-0.29243	0.284	-0.27954	-0.30203	0.28741	-0.29377	0.29323	-0.29544
				0.83188	0.70098	0.63714	0.55248	0.48055	-0.44732	0.41939	0.39104	0.38315	-0.34477	-0.32618	-0.31715	0.31375	-0.30943	0.2939	-0.30407	-0.28607	0.29797	-0.29253	-0.284	-0.27967	-0.30256	-0.28751	0.29412	0.29324	-0.29563
				-0.83531	0.70288	-0.6373	-0.55264	-0.48081	0.44774	0.41998	0.39149	0.38369	-0.34546	-0.32633	0.31716	-0.31443	0.3098	0.29392	-0.30413	0.2864	0.29842	-0.29281	-0.28482	0.27991	0.30263	-0.2877	0.2944	0.29328	0.29615
				-0.83581	0.70317	0.6377	-0.55281	0.48163	0.44788	-0.42044	0.39203	-0.38442	0.34547	0.32672	-0.31716	0.31456	0.31029	0.29422	-0.30446	0.2869	-0.29846	-0.29284	0.28518	-0.28019	-0.30351	0.28785	0.29467	-0.29334	0.29638
				0.83647	0.70384	0.63876	0.55291	-0.48165	-0.44828	0.42052	0.39212	-0.38462	0.34611	-0.32735	0.31737	0.31533	-0.31051	-0.29454	0.3046	0.28716	-0.29866	-0.29286	-0.28523	0.2802	-0.30392	0.28814	-0.29534	0.29384	-0.29665
				0.83883	0.70404	0.63916	0.55305	0.4822	-0.44885	0.42079	0.39235	-0.38466	-0.34633	0.32769	0.31759	0.31533	-0.31149	-0.29563	-0.30461	0.2873	0.29892	0.29298	0.28537	0.28137	-0.30402	0.28815	-0.29537	-0.29393	0.29743
				0.84083	-0.70455	0.63975	0.55308	-0.48305	0.44896	0.42205	-0.39253	0.38467	0.3468	0.32823	0.31887	0.31557	0.31188	0.29716	0.3048	-0.28748	-0.29907	0.29316	-0.28577	-0.2815	0.30412	0.2883	0.29551	0.29402	0.29753
				0.84085	0.70504	-0.6407	-0.55357	-0.48314	0.44964	-0.4224	0.39292	0.38517	0.34711	0.32829	0.31958	0.31566	-0.31205	-0.29721	-0.30551	-0.28773	-0.29918	0.29331	0.28612	-0.28153	-0.30443	0.28861	0.29584	-0.29403	-0.29754
				0.84105	0.70511	0.64136	0.55427	-0.48338	0.45026	0.4226	0.39307	-0.3855	0.3475	-0.32872	0.32015	-0.31635	0.31224	-0.2975	0.30639	0.28796	-0.29946	0.29349	0.28716	0.28159	0.30512	-0.28953	-0.29587	-0.29428	-0.2983
				0.84145	0.70606	0.64139	-0.55455	0.48448	0.45083	0.42341	-0.39349	0.38639	0.34756	0.33041	-0.32041	0.31665	-0.31225	-0.29759	-0.30653	0.28804	-0.29951	-0.29399	0.28718	-0.2816	0.30513	0.28978	-0.29596	0.29478	-0.29843
				0.84149	0.70658	0.64177	-0.55462	-0.48483	-0.45099	0.42354	0.39377	0.38682	0.34787	0.33062	-0.32044	-0.31665	-0.31255	-0.29776	0.30709	0.28822	-0.29959	0.29425	-0.2873	0.28174	0.30519	-0.29026	0.29609	0.2948	-0.29844
				0.84193	0.70662	-0.642	0.55494	0.48517	0.45135	-0.42412	0.39392	0.38687	-0.34902	-0.33129	-0.32071	-0.31666	0.31257	0.29812	-0.30714	0.28836	-0.29999	-0.29441	-0.28732	0.28238	0.30539	0.29032	0.29618	-0.29517	0.29889
				0.84197	0.70719	0.64331	0.55517	0.48537	0.4518	0.42451	-0.39509	0.38755	-0.34914	-0.33138	0.32137	-0.31667	-0.31257	-0.29824	0.30776	-0.28863	-0.30049	-0.29444	-0.2878	0.28297	-0.30568	0.29069	0.29632	0.29538	-0.29927
				0.84264	0.70728	-0.64405	0.55519	0.48551	-0.45184	0.42512	0.39539	-0.38761	0.35036	0.33197	0.32148	-0.317	0.31266	-0.2984	-0.30784	-0.28894	0.30076	-0.29453	0.28785	0.28302	0.3058	-0.29078	0.29651	0.29549	0.30034
				0.84446	0.70887	0.64554	-0.55592	0.48559	0.4519	0.42604	0.39539	0.38774	0.35129	0.33266	0.32163	0.3175	-0.31303	0.29856	0.30807	-0.28905	-0.30124	0.29479	0.28849	-0.28319	0.30587	-0.29084	-0.29655	0.29626	0.3005
				0.84505	-0.70943	0.64589	0.5573	0.48616	0.45272	-0.42674	-0.39598	0.3883	0.35144	0.33309	0.32183	-0.31774	-0.31325	0.299	0.3083	0.2892	0.30127	-0.29479	0.28881	-0.28325	0.30622	0.29089	0.29679	-0.29632	-0.30051
				-0.84649	0.71099	0.64617	0.55738	0.48652	-0.45286	0.42686	-0.3964	0.38847	-0.35158	-0.33333	-0.32225	0.31789	0.31343	0.29921	-0.30854	-0.28932	-0.30224	-0.29493	0.28883	0.28338	-0.30623	0.29093	-0.29715	-0.29646	-0.30057
				0.84702	0.71157	0.64751	0.55782	0.4866	0.45301	-0.42741	-0.39663	0.38867	0.35161	-0.33363	-0.32236	0.31853	0.31372	0.29926	0.30956	-0.28964	0.30226	0.29559	-0.28906	-0.28338	-0.30629	0.29098	0.29751	0.29664	0.30109
				0.8479	0.71161	-0.648	0.55829	-0.48696	0.45378	-0.42758	-0.39686	-0.38873	-0.35207	0.33411	-0.32237	-0.31864	0.31398	0.29949	0.31043	-0.28993	-0.30331	-0.29592	-0.28953	-0.28346	0.30645	-0.29125	0.29794	0.29728	-0.30128
				0.84881	-0.71167	0.64841	0.55851	0.48716	0.4539	0.42763	0.39731	-0.38876	0.35233	-0.33441	0.32285	-0.31885	-0.31525	-0.29966	0.31048	0.28997	-0.30337	-0.29592	-0.2898	0.28353	-0.30648	-0.29169	-0.29851	0.29751	-0.30133
				0.84941	-0.71179	0.65096	0.55866	0.48776	0.45462	-0.42835	0.39876	0.38906	-0.35249	0.33447	0.32315	-0.31922	-0.31549	0.30026	-0.31101	-0.29039	0.30356	-0.29628	-0.29028	0.28364	0.3065	-0.29178	0.29874	-0.29766	0.30169
				0.8498	0.71192	0.65248	0.55965	-0.48869	0.45469	-0.42864	0.39891	0.38912	-0.35255	-0.33477	0.32324	-0.31968	0.316	0.30083	0.31108	0.29064	-0.30375	-0.29671	0.29057	-0.28394	-0.30684	-0.29178	-0.29876	0.29776	0.30214
				0.84991	0.71237	0.65354	0.56051	0.48872	-0.4547	-0.42928	0.39933	-0.38953	-0.35271	0.33507	0.32325	-0.31997	0.31633	-0.301	0.31124	-0.29076	-0.30378	-0.29704	0.29137	-0.28406	-0.30782	0.29204	-0.29905	-0.29778	0.3022
				0.85215	0.71369	0.65363	0.56081	0.48946	0.45522	0.42933	-0.40012	0.38958	0.35334	0.33509	0.32398	-0.31999	-0.31659	0.3012	0.31125	-0.29133	-0.30385	-0.29716	0.29145	0.28419	0.30804	0.29231	-0.29909	-0.29804	0.30363
				-0.85233	0.71444	0.65401	0.5622	0.49021	0.45542	-0.4294	-0.40075	0.38971	-0.35371	-0.33534	0.32412	0.32016	0.31662	0.30201	0.31142	0.29143	-0.304	0.29719	-0.29175	-0.2844	-0.30839	0.29311	0.29919	0.29812	-0.30383
				0.85247	0.71489	0.65428	0.56263	0.49046	-0.45559	-0.42974	0.40121	0.39022	-0.35376	-0.33536	0.3244	-0.32101	0.31665	0.3021	-0.31175	-0.29144	0.30415	0.29763	0.29194	0.28503	0.30844	-0.29334	0.29931	0.29834	-0.30391
				0.85357	0.71497	0.65482	0.56272	0.49064	0.45591	0.42976	0.40126	-0.39049	0.35381	0.33544	0.32527	0.32113	0.31676	0.30232	0.31232	0.29152	-0.30458	-0.29834	0.29209	0.28525	0.30909	0.29402	0.29981	0.29871	-0.30405
				0.85381	0.71541	-0.65522	0.56331	0.49133	0.45647	0.43013	-0.40154	-0.39086	0.35423	0.33576	0.32573	0.32137	0.31682	0.30232	-0.31266	-0.29155	0.30466	-0.29906	-0.29212	-0.28622	0.30933	0.29408	0.30007	-0.29914	0.3042
				0.85488	0.71568	0.65684	-0.56338	0.49134	0.45701	-0.43055	0.40158	0.39097	0.35529	0.33586	0.32597	0.32168	-0.3182	0.30264	-0.31271	0.29221	0.30477	-0.29987	0.29248	0.28663	-0.30946	-0.29435	-0.30022	-0.29992	0.30442
				0.85499	0.71615	0.65702	0.5634	0.49172	0.45709	-0.43081	0.40165	0.39127	0.35581	0.33601	-0.32678	0.32176	-0.31906	0.30287	-0.31285	-0.29225	0.30499	0.30023	-0.29257	-0.28667	0.3096	0.29464	-0.30064	0.30017	-0.30454
				0.85633	0.71767	0.65849	0.5648	0.49217	-0.45712	0.43174	0.40175	0.39154	0.35626	-0.33657	-0.32717	0.32238	-0.31938	-0.30289	0.31297	0.29262	0.30501	0.30024	-0.2927	0.28696	0.30972	-0.29467	-0.30064	-0.30024	-0.30464
				0.85689	0.71767	0.65895	-0.5653	-0.49239	0.45724	0.43198	-0.4022	0.39258	0.3564	-0.33664	0.32724	-0.32239	0.31953	-0.30389	0.31347	0.29322	0.30514	0.30052	-0.29314	-0.2874	-0.30978	-0.29504	0.30075	0.3008	0.30474
				0.85734	0.71781	-0.65972	0.56541	-0.49255	-0.45738	0.43236	0.40223	0.39296	0.35649	-0.337	-0.3273	0.32259	-0.31999	-0.30401	-0.31372	0.29332	-0.30531	-0.30111	-0.29347	-0.28746	-0.30996	-0.29594	-0.30121	0.30113	-0.30476
				0.85837	0.71787	-0.66013	0.56569	0.49344	0.45812	0.43254	0.40262	-0.39403	0.35653	-0.33719	0.32758	-0.32259	-0.32003	0.30418	0.31387	-0.2934	-0.30541	-0.30135	0.2935	0.28756	-0.31027	0.29616	0.3013	-0.30144	-0.30488
				0.86014	-0.71799	-0.66021	0.56655	0.49352	0.45903	-0.43298	0.40303	0.39438	-0.35688	0.33736	-0.32765	-0.32293	0.3201	-0.30449	0.31414	-0.29343	0.30609	0.30153	-0.29363	0.2878	-0.31047	0.29637	0.30147	-0.30149	0.30508
				-0.86115	0.71875	-0.66028	0.56708	0.49404	-0.45905	-0.43398	0.40321	-0.39444	-0.35751	0.33887	0.32815	-0.32307	-0.32047	-0.30455	-0.31462	0.29405	0.30633	-0.30157	-0.2938	-0.288	-0.3109	-0.29663	0.30168	-0.30169	0.30553
				0.86259	0.71939	0.66108	0.56804	0.49417	0.45916	-0.4347	-0.40363	0.39471	0.35803	-0.33896	0.32824	0.3231	-0.32105	0.3046	0.3155	0.29417	0.30657	0.30187	-0.29386	-0.2882	-0.3111	-0.29678	0.30189	-0.30188	0.30625
				0.8633	0.72022	-0.66194	0.56807	0.49448	0.46023	-0.43477	0.4039	-0.39489	-0.35836	0.33943	-0.32836	0.32341	-0.32109	-0.30469	-0.31559	-0.29489	-0.30731	-0.30224	-0.29418	-0.28829	0.31132	0.29744	0.30191	-0.30251	-0.30628
				0.86389	0.72255	0.66235	-0.5684	0.49493	-0.4603	0.43623	0.40405	-0.39506	-0.35841	0.33947	0.3291	0.32388	0.32152	-0.30493	-0.31584	0.29512	0.30735	-0.30244	-0.29472	-0.28852	-0.31154	-0.29745	0.30193	0.30325	0.30653
				0.86395	0.72275	0.66319	0.56867	-0.4963	0.4604	0.43628	0.40422	0.39515	-0.35882	0.34051	-0.32946	0.3242	-0.32169	0.30595	0.31631	0.29582	0.30736	-0.30248	0.29513	-0.28935	-0.31194	0.29752	0.30224	0.30371	0.30667
				0.86444	0.72314	-0.66353	0.56879	-0.49667	0.46097	-0.43642	0.40453	0.3953	-0.35904	0.34053	-0.32952	-0.32456	-0.3222	0.30608	0.31638	0.29608	-0.30755	-0.30285	-0.29558	0.28982	-0.31204	0.29775	0.30231	-0.30372	-0.30727
				0.86514	0.72422	0.66436	0.56917	0.49716	0.4611	-0.43644	-0.40477	0.39535	0.35929	0.34064	-0.32985	-0.32484	0.32261	0.30616	0.31705	0.29636	0.30759	0.3029	-0.29612	-0.29	0.31222	0.29863	0.30342	0.30426	-0.30733
				0.8652	0.72429	0.66555	0.56918	-0.49767	0.46115	-0.4366	0.40503	0.39544	0.35984	0.34065	-0.3301	0.32528	-0.32267	0.30618	0.31714	0.29652	0.30778	0.30292	-0.29615	0.29014	0.31242	-0.29895	0.30344	-0.30448	-0.30775
				0.86566	0.72506	0.66629	0.57065	0.4986	0.46122	-0.43717	-0.40525	0.39546	0.3604	-0.34103	-0.33014	-0.32549	0.32283	-0.30625	-0.31714	0.29693	0.30785	0.30309	-0.29651	-0.29029	0.31269	-0.29913	-0.30388	0.30484	0.30821
				0.86645	0.72531	-0.66736	0.57175	0.49866	0.46233	-0.43763	-0.40692	0.39548	0.36052	-0.34212	0.33015	-0.32611	0.32334	0.30662	-0.31726	-0.29695	0.30826	-0.30351	-0.29715	-0.29033	0.31304	-0.30012	0.30418	0.30493	-0.30826
				-0.86819	-0.72551	-0.66846	0.57182	0.49984	0.4625	-0.43882	-0.40732	-0.39555	-0.36056	-0.34228	-0.33039	-0.32645	-0.3236	0.30666	0.31733	0.29764	0.30862	0.30445	-0.29732	-0.29144	0.31307	-0.30058	0.3053	0.30528	-0.30826
				0.86848	0.7265	0.66918	-0.57328	0.50037	-0.46327	0.44096	0.40743	0.39564	0.36077	-0.34233	0.33074	-0.32665	0.32404	-0.3067	-0.31801	0.29771	-0.30871	0.30446	0.2975	0.29145	-0.31342	-0.30093	0.30538	-0.30581	-0.30863
				0.86952	0.72759	0.67138	0.57517	-0.50065	0.46343	0.44136	-0.40744	0.39576	-0.36166	-0.34258	0.33078	0.32696	0.32429	0.3071	-0.31809	0.29784	0.30895	-0.30468	0.29771	-0.29238	-0.31343	-0.30113	0.30556	-0.30603	-0.30881
				0.87028	0.72797	0.67157	0.5758	0.5007	0.46374	-0.44138	-0.40756	-0.39598	0.36252	0.34281	-0.33162	-0.32702	-0.32434	-0.30712	0.31832	0.29802	0.3094	-0.3047	-0.29816	-0.29312	-0.31431	0.30132	0.30614	-0.30636	0.30917
				0.87037	0.72814	0.67159	0.57605	-0.5013	0.46395	-0.44168	0.40763	-0.39625	-0.36262	0.34341	0.33182	0.32738	-0.32468	0.30761	-0.31846	-0.29811	0.30974	0.30479	-0.29817	-0.29327	0.31456	-0.30141	-0.30719	0.30761	-0.30945
				0.87072	0.72847	-0.67171	-0.57623	-0.50316	0.46438	-0.44255	0.40823	0.39629	-0.36298	-0.34341	0.33328	-0.32738	0.32479	-0.30842	0.31906	-0.29814	-0.3098	0.30524	0.29992	0.29349	0.31499	0.30178	-0.30728	-0.30776	0.30959
				0.87098	0.72874	0.67184	-0.57624	-0.50341	0.46447	-0.44266	0.40842	0.39632	0.36349	0.34381	0.33356	-0.32752	0.32528	-0.30915	-0.31913	0.29822	0.31027	-0.30573	0.30006	0.29397	0.31593	-0.30223	0.30733	0.30821	-0.30964
				0.8736	-0.72978	-0.6741	0.57976	-0.50349	0.46449	-0.44305	0.40911	0.39665	0.36351	-0.34385	0.33374	0.3278	-0.32531	-0.30972	-0.31957	-0.29858	0.31039	0.30576	-0.30082	0.29404	0.31597	-0.3031	-0.30794	0.30847	0.31004
				-0.87369	0.73052	0.67428	-0.57989	-0.50353	0.46464	0.44307	0.40924	0.39709	0.36417	0.34392	-0.33406	-0.32796	0.32564	-0.30988	0.31967	0.2987	-0.31057	-0.30585	-0.30259	0.29488	-0.31626	-0.30337	0.30835	0.30859	-0.31009
				0.87409	-0.73095	0.67488	-0.58192	-0.50354	0.46557	0.4433	0.40937	0.39823	-0.36417	-0.34409	-0.33421	0.32893	-0.32602	0.31004	-0.32016	0.30005	-0.31078	-0.30604	0.3027	0.29519	0.31656	-0.30344	-0.30845	-0.30866	-0.31018
				0.87497	-0.73232	0.67557	0.58203	-0.50374	0.46559	0.44491	0.40968	-0.39868	0.36418	0.34436	0.33442	0.329	0.32603	0.31026	-0.3209	-0.30008	-0.3108	0.30644	-0.30302	0.29533	0.31687	-0.30388	-0.30879	-0.30871	-0.31025
				0.87591	0.73301	0.6757	-0.58242	-0.50386	-0.46655	-0.44496	0.41003	0.3994	0.36419	-0.34438	-0.33479	-0.32906	-0.32605	-0.31033	0.32106	0.30072	-0.31094	-0.30666	-0.30354	0.29553	0.31693	-0.30395	0.3088	0.30894	-0.31037
				0.87632	0.73338	0.67601	0.58256	0.50412	0.467	-0.44685	-0.41014	-0.39947	-0.36468	0.3449	0.33501	0.32915	-0.32638	0.31095	-0.32133	-0.30096	-0.31109	0.30711	-0.30371	0.29576	0.31712	-0.30454	-0.30885	-0.30928	0.31081
				0.87746	0.73352	0.67619	-0.58313	0.50466	-0.46731	0.44688	-0.41062	0.39955	-0.36536	0.34517	0.33518	0.32963	0.32686	0.31129	-0.32143	-0.3011	-0.3116	-0.30718	-0.30376	0.29666	0.31721	0.30465	-0.30947	-0.30932	-0.31091
				0.87749	0.73456	0.67668	-0.58327	-0.50508	-0.46734	0.44771	0.41067	0.39963	0.36609	0.34533	-0.33543	-0.32969	0.32721	-0.31168	0.32212	0.30117	0.31179	0.30762	0.30382	0.29689	0.31766	0.30466	0.30955	-0.30937	-0.31096
				0.87822	0.73462	0.6767	0.58365	0.50533	-0.46747	0.44778	-0.41069	-0.39975	0.36676	-0.34543	-0.33586	-0.33029	-0.32739	-0.3117	-0.32233	0.3012	-0.31234	0.30786	0.3039	0.297	0.31809	0.30478	0.31004	-0.30992	0.3114
				0.87837	0.73517	0.67717	0.58455	0.50538	-0.46756	-0.44783	-0.41069	0.40072	0.36696	0.34554	0.33603	-0.3303	-0.32809	0.31172	-0.3228	0.30129	0.31246	0.30794	0.30426	0.29845	-0.31839	0.30493	0.31005	-0.30996	-0.31162
				0.87993	0.73556	0.67756	-0.58621	-0.50543	0.46761	0.44808	-0.41195	0.40081	0.36735	0.34579	-0.33648	-0.33045	-0.32895	-0.31189	-0.32286	-0.30139	0.31252	-0.30798	-0.30433	0.29868	0.3185	0.30499	-0.3101	0.31019	0.31201
				0.87998	0.7359	0.67776	0.58622	0.50584	0.46771	0.44815	-0.41218	-0.40163	0.3674	0.34615	0.33652	-0.33086	-0.32929	-0.31205	-0.32289	0.3014	0.31335	0.30809	-0.30436	0.29918	0.31929	-0.30535	0.31042	-0.31085	0.31248
				0.88	0.73659	-0.67849	0.58648	-0.50591	0.46866	0.44824	0.41229	0.40183	0.36748	-0.34617	-0.33678	-0.33101	-0.32946	0.31228	0.32314	-0.30186	0.31352	0.30851	0.30452	0.29922	-0.31934	-0.30541	-0.31094	-0.31124	-0.31248
				0.88182	0.73682	-0.67883	-0.58655	-0.50606	-0.46875	0.4499	-0.41244	0.40263	0.36753	-0.34664	0.33698	-0.33113	-0.32958	-0.31234	-0.32338	-0.30188	0.31383	-0.30852	0.3047	-0.29949	0.31936	-0.30561	-0.31118	0.31221	-0.31272
				0.88207	0.73724	-0.67909	0.5878	0.5069	-0.46911	0.45016	0.41274	-0.40308	-0.36892	0.34726	-0.33731	0.33157	-0.33002	0.31248	0.32358	0.30198	-0.31384	0.30862	0.30478	0.29955	-0.31984	-0.30567	-0.31131	0.31274	-0.31275
				0.88465	-0.73854	0.67943	0.58849	0.5077	0.46933	-0.45083	-0.41315	0.40399	0.3692	0.34786	0.33743	0.33157	0.33004	0.31362	-0.32363	-0.30267	0.31394	-0.30869	0.30496	-0.30003	0.31989	-0.30573	0.31147	-0.31285	0.3138
				0.88494	0.73893	0.68215	0.58861	0.50772	0.46969	-0.45122	0.41334	0.4041	0.3705	-0.34818	0.33751	-0.33268	0.33029	0.314	0.32383	0.30283	-0.31415	0.30886	-0.30585	-0.30018	0.32007	-0.30578	0.31177	-0.31322	-0.31385
				0.88598	0.73909	0.68226	0.58903	0.50866	0.47123	0.45192	0.41385	-0.40427	-0.37174	0.3482	0.33831	0.33299	0.33081	-0.31442	-0.32408	0.30422	0.31439	-0.30939	-0.30593	-0.3003	-0.32011	0.30611	-0.31201	0.31332	0.31439
				0.88603	0.73972	0.68276	0.58904	0.50893	-0.4714	0.4521	-0.41392	0.40445	0.3726	0.34823	-0.33852	-0.33316	0.33111	0.31531	0.32465	-0.30502	-0.31491	0.30952	-0.30596	-0.30049	-0.32044	-0.30634	0.31227	-0.31413	0.31472
				0.88659	0.7398	0.68426	0.59004	-0.50893	0.47155	0.45314	-0.41399	0.4045	-0.37264	0.34923	-0.33899	0.33322	0.33159	0.31536	0.32477	-0.30519	0.31492	-0.30953	0.30612	-0.30062	0.3205	-0.30657	0.31244	0.3145	0.31475
				0.88795	0.74031	0.68469	0.59039	0.50942	0.47177	-0.45343	-0.41422	0.40472	-0.37277	0.34939	0.33902	0.3334	0.3318	0.31544	0.32478	-0.30557	-0.31506	-0.31035	0.30636	-0.30131	0.32058	-0.30712	0.31385	0.31458	-0.31482
				0.88797	0.74049	0.68487	0.59066	0.50943	0.47368	0.4541	0.41452	-0.40498	0.37369	-0.34992	-0.33911	0.334	-0.33211	0.31545	0.32481	0.30559	-0.31525	-0.31058	0.30661	-0.30136	0.32128	0.30751	0.31408	0.31486	0.31506
				0.89002	0.7405	0.68578	0.59104	0.51015	0.47371	0.45446	0.41546	-0.40581	0.37385	-0.35014	0.33915	-0.33403	-0.33227	0.31549	0.32582	0.30572	-0.31574	-0.31068	0.30704	-0.30237	0.32136	-0.30764	0.31435	0.31545	0.3156
				0.89026	0.74071	0.68627	-0.5913	0.51173	-0.47372	0.45466	0.41595	-0.40586	-0.3739	0.3502	0.3399	-0.33417	0.33245	-0.31573	0.32612	-0.30612	0.31583	0.31078	-0.30705	-0.30264	0.32186	0.30771	0.31454	0.31545	-0.31565
				0.89121	-0.74094	0.68695	-0.59169	0.51215	-0.47521	0.45468	0.41673	-0.40611	-0.37416	0.35048	0.34041	0.33422	-0.33281	0.31587	0.32618	-0.30612	-0.31607	-0.31094	-0.30711	-0.30273	0.32226	-0.30814	0.3146	-0.31594	-0.31604
				0.89123	0.74194	0.68769	0.59233	0.51239	0.4755	0.45471	0.4181	-0.40627	0.37443	-0.35103	0.34078	0.33468	-0.33306	-0.31591	0.32654	0.30665	0.31616	0.31098	0.30717	-0.30352	-0.32229	-0.30818	-0.31503	0.31607	-0.31622
				0.89306	0.74221	0.68772	0.59248	0.51244	0.47554	-0.45498	0.4194	-0.40635	-0.37448	-0.3513	0.34136	0.33493	-0.33313	-0.31612	0.32664	0.30669	-0.31625	0.31161	0.30724	-0.30352	0.32239	-0.30868	-0.31509	-0.31661	-0.31635
				0.89325	0.74269	0.68791	0.59354	-0.51282	0.47587	0.45516	0.42024	0.40664	-0.37459	0.35274	0.34179	0.3353	-0.33358	0.31618	-0.32717	-0.30699	-0.31705	0.31165	0.30727	0.30395	0.32282	0.3088	-0.31544	-0.317	0.31639
				0.89408	0.74523	-0.68792	-0.59379	0.51348	-0.47592	0.45519	0.42024	-0.40679	-0.37501	-0.35338	0.34225	0.33536	-0.334	0.31624	0.32722	-0.30821	0.31713	-0.31207	-0.30732	-0.30399	-0.32355	0.3088	0.31605	-0.31727	-0.31657
				0.89547	0.74582	-0.68809	0.59474	0.51428	0.47651	0.45659	-0.42085	0.40684	0.37537	0.35339	0.34287	0.33541	-0.33404	-0.31625	0.32757	0.30822	0.31828	0.31224	-0.30812	0.30417	0.32385	-0.30924	-0.31681	0.31745	0.3168
				0.89645	0.74798	0.68824	0.59477	0.51458	0.47652	-0.45735	-0.42136	-0.40685	-0.37552	0.35361	-0.34319	0.3355	-0.33454	0.3163	-0.32781	-0.30839	0.31863	0.31269	-0.30837	-0.30427	-0.32434	0.30956	0.31696	-0.31776	0.31738
				-0.89836	0.74814	0.68886	0.59507	0.51506	0.47713	0.45746	0.42159	-0.40693	0.37557	0.35381	-0.34346	0.33552	0.33462	-0.31655	0.32787	-0.30868	0.3197	0.31285	0.309	0.30444	0.32442	-0.30972	0.31697	0.3179	0.31759
				0.89897	0.74822	0.68899	-0.59534	0.51604	0.47753	0.45912	-0.42169	0.40802	-0.37643	-0.35429	0.34359	-0.33566	0.33468	0.3168	-0.32811	-0.309	-0.31978	-0.31308	0.30952	0.30594	-0.32479	0.30974	0.31706	0.31802	-0.31773
				0.89959	0.75005	0.6896	0.59562	-0.51643	0.47765	0.45943	0.42233	-0.40808	0.37669	0.35532	0.34364	0.33587	-0.33469	0.31686	-0.32836	-0.30909	-0.31999	-0.3133	0.31012	0.30632	0.32483	-0.31118	-0.31727	0.31818	0.3179
				0.90039	0.75086	0.69022	-0.59564	0.51719	-0.47831	-0.4599	0.42395	0.40838	0.37686	0.35568	0.34373	0.336	0.33507	-0.31724	0.32845	-0.3095	0.32037	-0.31332	-0.3102	0.30643	0.32504	-0.3117	0.31743	-0.31844	0.31794
				0.90112	0.75193	0.69044	0.59613	-0.51729	0.47873	0.46069	0.42411	0.409	0.37691	-0.35595	0.34382	0.33711	0.33512	0.31726	-0.32911	0.3098	-0.32089	0.31335	-0.3104	-0.30655	0.32506	0.31177	-0.3177	-0.31905	-0.31796
				0.90176	0.75208	0.69189	0.59727	0.51763	0.47888	0.46075	-0.42544	-0.40901	-0.37761	0.35628	-0.344	0.33712	-0.33518	0.31752	0.32943	0.30982	0.32107	0.31345	0.31071	0.30736	0.32545	0.31219	0.31783	-0.31931	-0.31818
				0.90384	-0.75403	0.69231	0.59771	0.51778	-0.47909	0.46084	0.42607	0.41033	0.37833	0.35634	0.34402	-0.33715	-0.33534	0.318	-0.32943	-0.30988	-0.32192	-0.31355	0.31099	-0.30853	0.32557	-0.31226	-0.31806	0.31941	-0.31825
				0.90409	0.75496	0.6931	0.59774	0.51851	0.47924	-0.46091	0.42677	-0.41072	0.3784	-0.35636	0.34442	-0.33765	0.33573	0.31836	0.32958	-0.3099	0.32202	0.31358	-0.31101	-0.3086	0.32557	0.31231	0.31864	-0.31993	-0.31828
				-0.9047	0.75505	0.69312	-0.59839	0.51997	0.47934	-0.46126	0.4274	-0.41076	0.3792	-0.35639	0.34452	0.33838	-0.33615	0.31848	0.32961	0.3104	0.32214	-0.31387	-0.31107	0.30875	0.32575	-0.31245	-0.3187	-0.32	0.31862
				0.90525	0.75536	-0.69561	0.59895	0.52077	0.47943	-0.46134	-0.4282	0.41079	-0.37989	0.35652	-0.34474	0.33843	-0.33686	0.31858	0.33012	-0.3104	0.32236	0.31398	0.31181	0.30883	-0.32611	0.31246	-0.31876	0.32008	0.31896
				0.90659	0.75542	0.69682	0.59905	0.52088	0.4801	0.46176	0.42853	0.41082	-0.38036	0.35658	-0.34493	0.33844	-0.33716	-0.31917	0.33062	0.31059	-0.32242	-0.31415	0.31254	-0.30885	-0.32643	0.31272	-0.31908	0.3201	-0.31929
				0.90674	0.7556	0.69764	0.59945	-0.52187	0.48061	-0.46201	0.42854	0.411	0.38039	0.35719	0.34522	0.33938	0.33826	-0.3193	0.33063	0.31089	-0.32408	0.31419	0.31265	-0.30918	0.32644	-0.31279	0.31922	-0.32052	-0.31953
				0.90786	0.75584	0.69786	0.59953	-0.52224	-0.481	-0.46247	0.42884	0.41112	-0.38047	-0.3572	0.34524	-0.34013	-0.3383	-0.31962	0.33079	-0.31095	-0.3243	-0.31437	-0.31276	0.30937	0.32672	-0.31297	-0.31955	-0.3214	0.31956
				0.91125	0.75731	0.69803	0.60021	0.52227	-0.48181	0.46278	-0.42901	0.41144	0.38058	-0.35755	-0.34526	0.34014	0.33833	-0.31995	0.33107	-0.31103	0.32432	0.31478	-0.31308	0.30937	-0.32682	0.31318	0.32014	0.32162	0.31986
				0.91174	0.75733	0.69883	-0.60024	-0.52257	-0.48197	-0.46294	-0.42949	0.41298	-0.38067	0.35797	-0.34554	-0.34138	-0.33848	0.32067	0.33147	0.31126	0.32494	-0.31492	0.31317	0.31021	-0.32724	0.31335	0.32021	-0.32185	-0.32114
				0.91189	0.76059	0.69946	0.60091	-0.52333	0.48233	-0.46308	-0.43043	0.41403	-0.38098	0.35861	0.34558	0.34212	0.3385	-0.32137	-0.33177	0.31134	0.32497	0.31546	0.31379	-0.3115	-0.32741	0.31366	-0.32036	-0.32225	-0.32125
				0.91198	0.76206	0.70079	-0.60175	-0.52369	-0.48241	-0.46365	0.43098	-0.4141	-0.38173	-0.35862	-0.34595	-0.34259	0.3386	0.32148	0.33212	-0.31136	-0.32532	-0.31559	-0.31482	0.31154	-0.32797	0.31379	0.32151	0.32248	0.32153
				0.91217	0.76252	0.70148	0.60319	0.52524	0.48261	-0.46439	-0.43133	0.41527	0.38181	0.35882	0.34612	-0.3432	-0.33886	-0.32267	0.33339	-0.31141	0.32559	-0.3159	0.31492	-0.31156	0.32801	0.31437	0.3219	-0.32279	0.32162
				0.9125	0.76253	-0.70239	0.60348	0.5254	0.48306	-0.46509	0.43153	-0.41542	-0.38187	0.35946	-0.34667	0.34321	-0.3394	-0.32311	-0.33368	-0.31171	-0.32563	-0.31593	-0.31516	0.31172	0.32846	0.31451	-0.32207	0.32307	0.32235
				-0.91437	-0.76394	0.70361	0.60374	0.52652	0.48307	0.46754	0.43158	-0.41544	-0.38234	0.35998	-0.3469	-0.34321	0.33954	0.32376	-0.3341	0.31194	0.32616	0.31656	-0.31527	0.31181	-0.3285	-0.3153	0.32236	0.32311	0.32275
				0.91454	0.76443	0.70428	-0.60388	-0.52674	0.48319	0.46765	-0.43166	-0.4155	0.38245	-0.36039	0.3472	-0.34396	0.33984	-0.32394	-0.33431	-0.31205	0.3269	-0.31696	0.31562	-0.31197	-0.32856	0.31632	0.32292	-0.32312	-0.32326
				0.91591	0.76462	0.70508	-0.60412	0.52681	0.48446	0.46786	-0.43166	-0.41556	-0.38349	0.36077	-0.34725	0.34423	0.33992	0.32418	0.33434	0.31213	-0.32754	-0.31704	-0.31587	0.31217	0.32861	-0.31634	0.32318	0.3236	0.3234
				0.9183	0.76511	0.70533	0.60413	0.52746	-0.48605	-0.46806	0.43181	0.41558	-0.38353	0.36089	0.34726	-0.34424	-0.34004	0.3243	0.33439	0.31225	-0.32812	0.31723	0.31608	-0.31282	0.32867	0.31674	-0.32352	0.3237	-0.3242
				0.91835	-0.76517	0.70561	-0.60526	0.52819	0.48627	-0.46958	-0.43227	0.4157	0.38367	0.36131	-0.34735	0.34483	0.34013	0.32446	0.33442	0.31246	0.32886	0.31767	-0.31611	-0.31337	-0.32893	-0.3169	-0.3236	-0.32385	-0.32473
				0.92055	0.76547	0.70596	0.60531	0.52841	0.48734	-0.47044	0.43248	0.41629	-0.38491	0.36153	0.3474	-0.34531	-0.34015	-0.32463	-0.3351	-0.31266	-0.32893	-0.31809	0.31691	-0.3134	-0.32896	-0.31711	0.32386	-0.32435	0.3251
				0.92087	0.76582	0.7062	0.6068	-0.52959	-0.4881	-0.47063	0.43293	0.41673	-0.38493	-0.36171	0.34748	-0.34549	0.34026	0.3249	0.33576	-0.31277	0.32895	0.31825	0.31692	-0.31341	0.3292	-0.3172	-0.32389	-0.32436	0.32582
				0.92095	0.76734	-0.7063	0.60766	-0.5312	-0.48835	-0.4714	0.4333	0.41716	0.38509	-0.36249	-0.34787	-0.34595	-0.34039	-0.32497	-0.33588	-0.31306	0.32903	-0.3183	-0.31705	-0.31397	-0.32925	-0.31722	-0.32435	0.32455	-0.32602
				-0.92096	0.76895	0.70652	0.60853	-0.53125	-0.48889	0.47168	-0.43344	0.41751	-0.38523	0.36369	0.34828	0.34607	0.34047	0.32527	0.33671	-0.31324	-0.32918	0.31844	-0.31714	0.31404	-0.32934	0.31766	0.32448	-0.32489	0.32627
				0.9225	0.76981	-0.7069	0.60886	0.53187	-0.48894	-0.47189	0.43363	0.41752	-0.38582	-0.36379	-0.3483	0.34625	-0.34056	0.32565	0.33789	0.31325	-0.3293	0.31881	0.31722	0.3143	-0.3297	-0.31795	-0.32462	-0.32504	-0.32761
				0.92265	0.76998	0.70749	-0.609	0.53201	-0.48943	-0.47203	-0.4352	-0.41754	-0.38707	-0.36404	-0.34905	-0.34645	0.34058	0.32573	0.33799	0.31327	-0.32953	-0.3193	-0.31726	-0.31434	0.33	0.31809	0.32472	0.32508	0.32774
				0.92321	0.77005	0.70853	0.60922	-0.5322	0.49022	0.4734	0.43525	0.41769	0.38752	-0.36418	-0.35005	0.34683	-0.34085	0.32665	-0.33814	-0.31342	0.32958	0.31938	-0.31728	0.31443	0.33017	-0.3181	-0.32495	0.32528	0.32825
				0.92563	0.77043	0.70961	-0.60956	0.53331	0.49062	-0.47377	-0.43543	0.41789	-0.38759	0.36421	0.35035	-0.34733	0.34175	-0.32681	0.3389	-0.3136	-0.32964	-0.31961	0.31751	0.31472	0.3303	-0.31825	-0.32522	0.32627	0.3284
				0.92592	-0.77076	0.71039	0.60966	0.53364	0.491	-0.47438	0.43553	0.41807	0.38831	-0.36425	-0.35046	-0.34757	-0.34185	-0.32739	0.33928	0.3138	0.32988	0.31981	-0.31773	0.31473	0.33061	-0.31851	0.32536	-0.32643	-0.32863
				0.92667	0.77186	-0.71082	0.61145	0.53367	0.4917	0.47526	-0.43575	0.4183	0.38868	0.36462	0.35116	-0.34759	0.34234	0.32874	0.33954	-0.3138	-0.33101	0.31989	0.31781	-0.31474	0.3308	-0.31872	0.32538	0.32651	-0.32876
				0.9268	0.77497	-0.71123	-0.6118	0.53427	0.49224	0.47552	0.43601	0.41844	-0.38877	0.36521	0.35134	-0.3478	-0.34312	0.32904	-0.33984	-0.31415	-0.33115	0.32025	-0.31781	-0.31516	0.33105	0.31896	-0.3256	0.32654	-0.32925
				0.92698	0.77571	-0.71189	-0.61322	0.53476	0.49255	0.47555	0.43661	-0.41874	0.38883	0.36752	0.35195	0.34781	-0.34317	-0.32908	-0.34003	-0.31416	-0.33121	0.32085	0.31801	-0.31598	-0.33123	0.31915	0.32561	-0.32695	-0.3294
				0.92737	0.77606	-0.71219	0.6133	-0.53488	-0.49257	0.47566	0.43699	-0.41885	0.38932	0.368	-0.35247	0.34825	0.34341	-0.3296	-0.34041	-0.31439	-0.33143	-0.32105	0.31801	0.31607	0.33125	0.31934	-0.32597	0.3272	0.32967
				0.92766	-0.77656	0.71291	0.61369	0.53632	0.49292	0.47583	0.43756	0.41932	0.38967	-0.36813	0.35248	-0.34851	0.34373	-0.33054	-0.34064	0.31464	0.33232	-0.32122	0.31837	0.31618	0.33157	-0.31985	-0.32604	-0.3274	-0.33093
				0.92789	0.77685	0.71341	0.61383	0.53716	0.49308	-0.4766	0.43796	0.41972	-0.38983	0.36851	-0.35301	0.34859	-0.34385	0.33074	0.34074	-0.31481	0.33243	-0.32134	-0.31858	0.31647	-0.3316	-0.3199	-0.32609	0.32758	-0.33136
				0.92908	0.78034	0.71393	0.61445	0.53721	-0.49314	0.47668	0.43797	0.41978	0.38999	0.36854	0.35399	0.34861	0.344	0.33108	-0.34147	-0.31591	-0.33247	-0.32146	0.3191	0.31679	0.33276	0.32019	0.32654	0.32792	0.33145
				0.92924	0.78117	0.71409	0.6149	0.53731	0.49348	0.47727	0.43801	0.42105	-0.39	-0.36955	0.3541	0.34865	-0.34407	-0.3311	-0.34238	0.31596	0.33259	0.32147	0.31949	-0.31688	0.33337	0.32104	0.3267	0.32804	-0.33157
				0.92965	0.7818	0.71471	0.61707	-0.53801	0.4936	-0.47788	0.43815	0.42132	-0.39045	0.36958	0.3541	-0.34868	0.34448	-0.33118	-0.3424	0.31635	-0.33285	0.32155	0.31992	0.31696	-0.3335	0.32121	-0.32818	-0.32879	-0.3316
				0.93116	0.78218	-0.71493	0.61716	0.5392	-0.49421	-0.47797	0.43844	0.42165	0.39048	-0.37001	-0.35422	-0.34908	-0.34452	-0.33164	-0.34267	-0.31708	-0.33339	-0.32208	-0.32006	0.31724	-0.33353	0.32128	0.32823	0.32898	0.33259
				0.93282	0.78241	-0.71499	0.61822	-0.5395	-0.49421	0.47828	0.43876	0.42182	-0.39068	-0.37003	-0.35485	0.34933	-0.34467	0.33167	0.34292	0.31819	-0.33346	-0.32239	-0.32023	-0.31798	0.33386	0.3223	0.3288	0.32904	0.33291
				0.93438	-0.78349	-0.71519	0.61839	0.53979	-0.49443	-0.4787	-0.43938	-0.42228	0.39104	0.37012	-0.35517	0.34939	-0.34509	-0.33195	-0.34313	-0.31843	-0.33421	0.32296	-0.32028	0.31823	0.33395	-0.32236	0.32948	0.32907	-0.33308
				0.93507	0.78376	0.71542	0.6192	-0.54041	-0.49457	0.47893	-0.43968	0.42271	0.39128	-0.37024	-0.35542	0.34952	-0.34514	0.3324	0.34319	-0.31892	0.33439	0.32297	-0.3203	0.3183	-0.33412	0.32265	0.33001	-0.32961	-0.33323
				0.93568	0.78483	0.71563	-0.61988	0.54044	-0.49468	0.47933	-0.44082	0.42312	0.39145	0.37095	0.35551	-0.34979	-0.34561	-0.33275	0.34328	0.31924	0.33472	0.32367	0.32037	0.31909	0.33418	-0.32293	0.33007	-0.3297	-0.33348
				0.93668	0.78505	0.71611	0.62	-0.5408	-0.49492	-0.47999	-0.44091	0.42319	0.39344	-0.37192	0.35575	0.34991	-0.34653	0.33294	0.34334	0.31926	0.33513	0.32391	-0.32071	0.31998	-0.33426	0.32385	0.33078	-0.32977	-0.33355
				0.93715	0.78545	0.71696	-0.62016	0.54082	0.49509	0.48026	0.44102	0.42321	0.39412	0.37208	-0.35575	0.35004	0.34731	0.33329	0.34538	-0.32012	0.33516	0.32417	0.32073	-0.32005	0.33436	0.32416	0.33132	0.32995	-0.33472
				-0.93785	-0.7871	-0.71742	-0.62091	0.54082	0.49542	-0.48083	0.44123	0.42331	-0.39449	-0.37226	0.35679	0.35042	-0.34754	-0.3333	0.34616	-0.32055	0.33531	-0.32445	-0.32094	-0.32005	0.33524	-0.32472	0.33145	-0.33072	0.33474
				0.93953	0.79009	-0.71781	0.62093	0.54152	0.49554	0.48095	0.44125	0.42336	0.39478	-0.37274	-0.35683	-0.35048	0.34767	0.33351	0.3462	0.32061	0.33546	-0.32458	-0.32095	-0.3208	-0.33609	0.32477	-0.33159	-0.33077	0.33485
				0.94161	0.79035	0.71838	-0.62187	0.54215	0.49588	0.48095	0.44195	-0.42338	0.39507	0.37303	-0.35695	0.35124	0.34796	-0.33436	-0.34639	0.32087	-0.33558	0.32483	-0.32099	0.32081	0.3364	-0.3249	-0.33213	0.33096	-0.3351
				0.94175	0.79122	-0.71855	-0.6224	-0.54265	0.49648	-0.48102	0.44319	-0.42376	-0.39511	0.37342	-0.35726	0.35142	-0.34886	-0.33465	0.34651	-0.32149	-0.33572	0.32541	0.32121	0.32103	0.33657	0.32531	0.33232	0.33098	0.3354
				0.94199	0.79224	0.71891	0.6236	0.54271	0.49649	0.48107	0.44388	0.42451	0.39526	0.37393	0.35728	-0.35216	0.34905	-0.33468	0.34725	0.32175	0.33582	0.32566	0.32137	0.3212	0.33657	0.32549	0.33255	0.33104	0.33571
				0.94235	0.79292	0.71933	0.62523	-0.54326	0.49707	-0.48198	0.44401	0.42519	-0.39566	0.37414	0.3574	0.35272	-0.34907	-0.33513	-0.34743	-0.32182	-0.33588	0.32584	-0.32168	0.32128	-0.33658	0.32554	0.33277	-0.33122	0.33642
				0.94252	0.79305	0.72	0.62544	0.54557	0.49728	-0.48216	0.44444	-0.42537	0.39649	-0.37475	-0.35763	-0.35297	0.34946	-0.33514	0.34751	-0.32187	-0.33614	-0.3261	0.32171	0.322	-0.33669	0.32578	-0.33282	-0.33172	0.33656
				0.94296	0.7932	0.72043	0.6257	-0.54627	-0.49778	0.48242	0.44458	0.42555	-0.39651	-0.37544	-0.35787	0.35305	-0.35009	0.33525	-0.34811	0.32207	-0.33714	0.32666	-0.32181	-0.32249	0.33692	-0.32587	0.33361	0.33196	-0.33668
				0.94431	0.79351	0.72049	0.62639	-0.54723	0.49866	0.48358	0.44464	0.42629	-0.39711	0.37579	-0.35818	-0.35331	-0.35033	0.33546	0.34831	-0.32227	-0.33827	0.32687	-0.32201	0.32271	-0.33709	0.32604	-0.33401	0.33236	-0.33712
				0.94505	0.79373	-0.72071	0.62737	-0.5473	-0.49916	0.48384	0.44495	0.42674	0.39758	-0.37581	0.35837	0.35358	0.35086	0.33547	-0.34839	0.3224	0.33902	0.32732	-0.32205	-0.32303	-0.33711	0.32691	-0.33497	0.33286	0.33727
				0.94531	0.79382	0.72089	0.62838	0.54741	-0.49932	0.48389	0.4467	0.42695	0.39783	-0.37587	0.35892	0.35363	0.35086	-0.33563	-0.3485	0.32252	0.33904	0.3275	0.32215	0.32305	-0.33727	0.32724	-0.33535	0.33306	0.33734
				0.94714	0.79408	-0.7215	0.62882	0.54761	0.49938	0.48457	0.44683	0.42744	-0.39793	-0.37592	0.36012	0.35389	0.35099	0.33567	0.34898	0.32284	-0.3393	-0.32756	0.32289	0.32329	-0.33739	-0.32728	-0.33637	-0.33314	0.33791
				0.94834	0.79425	0.7216	-0.62883	0.54819	0.49954	-0.48474	0.44694	0.42802	-0.39823	0.37595	-0.36012	0.35452	0.3512	-0.33602	0.35016	0.32383	-0.33931	0.32789	0.32331	-0.32343	-0.33751	0.32759	-0.33653	-0.33324	-0.33882
				0.95127	-0.79443	0.72322	0.62891	-0.54906	-0.49964	-0.48478	-0.44709	-0.42834	0.39844	0.37606	-0.36024	0.35478	0.35131	0.33637	-0.35043	-0.32416	0.33951	-0.32794	-0.32344	0.32365	0.3376	-0.32849	0.33655	0.33326	0.33966
				0.9514	0.79461	-0.72372	0.62914	0.54929	-0.49989	0.48554	0.44724	0.42858	0.39909	-0.37606	0.36118	0.355	0.35131	0.33642	0.35069	-0.32452	0.33976	0.32885	0.32394	-0.32373	0.33793	0.32852	-0.33662	0.33346	0.33969
				0.95803	0.79505	-0.72394	0.62928	-0.55026	-0.50021	0.48563	-0.44729	-0.42934	-0.39988	0.37616	-0.36137	-0.35546	-0.35139	-0.3367	-0.351	-0.32479	0.33994	0.32894	0.32394	0.32426	-0.33799	0.32874	0.33711	-0.33371	-0.34004
				0.9605	0.79597	0.72425	0.63031	0.5505	0.50037	-0.48631	0.4474	-0.42943	-0.40144	-0.3763	0.3614	-0.35592	0.35153	0.33672	0.35124	-0.32513	0.34008	-0.32904	0.3244	-0.32431	-0.33799	-0.32961	-0.33711	0.33383	-0.34119
				0.96477	0.79606	-0.72444	0.6304	0.55054	0.50087	0.48653	-0.44792	0.43004	0.40185	0.37657	0.36197	0.35637	0.35169	0.33673	-0.35142	0.32522	-0.34056	-0.32904	-0.32468	-0.32462	-0.33837	-0.32982	0.33733	-0.33391	0.34133
				0.96728	0.79746	0.7247	0.63139	0.55069	0.50155	-0.48756	0.4482	0.43026	0.40198	0.37709	-0.36216	0.35709	-0.35213	0.33761	-0.35142	0.32531	-0.34096	0.32912	0.32477	0.32487	0.33847	0.33031	-0.33738	-0.33391	0.3416
				0.96781	-0.79757	0.72474	-0.6329	0.55103	0.50183	-0.48884	-0.44823	-0.43047	-0.40215	0.3771	0.36229	0.3589	0.35223	-0.33856	-0.35155	0.32565	0.34114	0.32912	0.32477	-0.32625	0.3386	0.33092	0.33742	0.33415	0.34162
				0.96837	0.79824	0.72536	0.63303	0.5517	0.50184	-0.48887	-0.44825	-0.43054	0.40235	-0.37768	-0.36234	-0.3592	-0.35255	0.33885	-0.35251	0.3258	0.34147	-0.3293	0.32499	-0.32652	-0.33894	0.33101	-0.33745	0.33427	-0.34174
				0.96976	0.79849	0.72597	0.6333	-0.55193	0.5024	-0.48888	0.44843	-0.43174	-0.40254	-0.37768	-0.36245	-0.3592	-0.35268	0.33889	0.35278	0.32639	0.34152	-0.32937	-0.32581	-0.32653	-0.33959	-0.33124	-0.33791	0.33448	0.34175
				0.97001	0.79912	0.72646	-0.63341	0.55254	0.50281	0.48897	-0.44882	0.43177	-0.40311	-0.3778	-0.3633	-0.35995	0.35283	0.33923	-0.35343	-0.32655	0.3416	0.32967	0.32599	-0.32739	-0.33991	0.33136	-0.33792	-0.33511	0.34211
				0.97078	0.79955	0.72793	-0.63361	-0.55303	0.50488	0.489	0.44889	0.43183	0.40364	-0.37799	0.36356	-0.36053	-0.35295	0.33942	-0.35343	0.32658	0.34167	-0.32982	-0.32608	0.32773	-0.34028	0.33148	0.33845	-0.33539	0.34216
				0.97102	0.80022	-0.73432	0.63404	0.55331	0.50546	0.48952	0.4491	0.43216	0.40514	0.37863	-0.36397	-0.36068	-0.35406	0.33963	0.35352	0.32679	0.34207	-0.3299	-0.32655	0.32832	-0.34057	-0.3321	-0.3386	-0.33599	0.34247
				0.97222	0.80109	0.73624	0.6343	0.55348	0.50559	0.48978	0.44913	0.43247	0.40526	-0.37912	0.36504	-0.36078	0.35414	-0.33969	-0.35365	0.32708	0.34211	-0.33019	-0.32665	0.32833	-0.34057	0.33216	0.33866	0.33706	0.34302
				0.97293	0.80151	0.73648	-0.63455	0.55384	0.50691	0.49083	-0.44932	-0.43253	0.40539	0.37946	0.36512	0.36108	-0.35436	0.33994	-0.35366	-0.32721	0.34224	0.33032	-0.32669	-0.32903	0.34201	-0.33267	0.33884	-0.33723	-0.34311
				0.97675	0.80184	0.73673	-0.63462	0.55447	-0.50707	-0.49206	0.44937	0.43261	0.40573	0.38013	0.36536	-0.36133	-0.35453	0.34011	0.35459	-0.32722	-0.34231	0.33067	-0.32679	-0.32968	-0.34217	-0.33322	-0.33953	-0.33728	-0.3432
				0.97747	0.80198	-0.73697	-0.6351	0.55453	0.50713	-0.49223	-0.44937	0.43279	0.40582	-0.38073	0.36543	-0.36134	-0.35491	0.34028	0.35495	0.32752	0.34273	-0.33104	0.32705	0.33039	0.34259	0.33347	0.33982	0.33735	-0.3433
				0.97788	0.80337	0.73785	0.63545	0.55689	0.50767	0.49235	0.44957	0.43285	-0.40613	0.38088	0.3658	0.3614	0.35508	0.34067	-0.35525	-0.32816	0.34298	-0.33173	-0.32741	-0.33101	-0.34291	0.33423	0.33987	0.33772	0.34361
				0.98193	0.8054	0.73872	0.6356	0.55695	-0.50778	-0.493	0.44977	-0.43362	0.40634	0.38101	0.36592	0.3625	-0.35509	-0.34111	0.35567	-0.32862	0.34354	0.3318	-0.32776	-0.33174	0.34326	0.3344	0.34023	-0.33782	-0.34388
				0.98252	0.80645	0.73874	0.63586	0.55727	0.50806	-0.49311	0.44983	-0.43367	0.40643	0.3811	0.36623	-0.36265	0.35645	-0.34156	0.35572	0.32869	-0.34382	0.33185	-0.32815	0.3322	0.3433	-0.33466	-0.34047	-0.33784	0.34437
				0.9826	0.80679	-0.73892	0.63612	0.55747	-0.50831	0.49373	-0.44987	0.4337	0.40644	0.38128	-0.36679	0.3629	0.35671	-0.34169	-0.35578	0.32961	0.34425	-0.33201	-0.32885	0.33227	0.34331	-0.33468	-0.34056	0.33811	0.34456
				0.9827	0.80823	0.73947	0.63612	-0.55795	0.50921	-0.49411	0.45042	0.43384	0.40653	-0.38142	-0.36722	0.36298	-0.35787	-0.34203	-0.35606	-0.32964	-0.34431	0.33235	0.3291	0.33309	-0.34344	-0.3347	0.34061	-0.3387	-0.34469
				0.98605	0.80829	0.74053	0.63717	-0.55825	-0.50928	0.49413	-0.45139	-0.43469	-0.40837	0.38174	-0.36798	-0.36324	0.35797	-0.34225	0.35609	-0.32971	0.34444	-0.33243	0.33006	0.3336	-0.34351	-0.33497	-0.34061	-0.3387	0.3448
				0.98847	0.81171	-0.74116	0.63736	0.55913	0.50944	0.49415	0.45183	0.43522	-0.40884	0.38188	0.36835	0.36326	0.35798	-0.34313	-0.35612	0.33052	0.34475	-0.33267	-0.33021	0.33364	-0.34371	0.3354	-0.34103	-0.33919	-0.34536
				0.9887	0.81171	0.74178	0.63747	0.55974	-0.5096	0.49416	-0.45199	-0.43564	-0.40892	-0.38203	-0.36844	-0.3633	-0.35809	-0.34318	-0.35667	-0.33079	-0.3451	0.33309	-0.33109	-0.33385	-0.34445	-0.3355	0.3412	-0.33954	0.34546
				0.99121	0.81196	0.74232	0.63761	0.56038	0.50969	0.49476	0.45258	0.43592	0.40966	-0.38218	-0.36912	0.36337	-0.35816	0.34334	-0.35722	0.3309	-0.34552	-0.33352	-0.33153	0.33427	0.3445	0.3356	0.34135	-0.33987	0.3456
				0.9925	0.81468	0.7425	0.63934	0.56049	-0.51167	0.4948	0.45282	-0.43647	0.40972	-0.38245	0.36918	-0.36349	-0.35818	0.34336	0.35758	0.33134	0.34573	-0.33379	-0.33154	0.3344	-0.34459	0.33606	0.34172	-0.34001	-0.34613
				0.99523	0.81702	0.74318	0.63936	-0.56072	0.51168	-0.49526	-0.45286	-0.43673	-0.4102	-0.38274	-0.36992	0.36377	-0.35822	0.3435	0.35781	-0.3316	-0.34578	0.33403	-0.33186	-0.33461	0.34482	-0.3362	-0.3418	0.34033	-0.34631
					0.81804	0.74357	0.64073	0.56093	0.51212	0.49561	-0.45362	-0.43702	0.41037	-0.38274	0.36998	0.36383	-0.35836	-0.34374	-0.35792	-0.33264	-0.346	0.33442	-0.33206	0.33467	-0.34514	0.33687	-0.34216	-0.34078	-0.34729
					0.8185	0.74416	0.64251	0.56232	0.51253	0.49578	0.45368	0.43715	0.41055	-0.38367	-0.37002	-0.36461	-0.35903	0.34409	0.35871	-0.33372	-0.34698	-0.33468	0.33231	0.3353	-0.34547	-0.33699	-0.34235	0.34099	-0.34764
					0.81882	0.74418	-0.64358	0.56235	0.5126	-0.49621	-0.45384	0.43793	0.41091	-0.38371	-0.37015	0.36481	0.35937	-0.34501	0.35893	-0.33374	0.34792	-0.335	0.33243	-0.33532	0.3455	-0.33743	-0.34245	-0.34178	0.34793
					0.81981	-0.74425	0.64392	0.56246	0.51286	0.49625	0.4541	0.4381	-0.41145	0.38393	0.37019	-0.36527	0.35969	-0.34535	-0.35961	-0.33381	0.34812	-0.33512	-0.33276	-0.33579	-0.34563	0.33768	0.34253	-0.34183	0.3491
					0.82034	0.74483	-0.6449	0.56263	0.51304	0.4974	0.45509	0.43824	0.41168	0.38414	0.37061	-0.36559	0.35983	-0.34621	-0.35974	-0.33394	0.34901	-0.33518	0.33299	0.33665	0.34589	-0.33804	0.34305	0.34218	-0.3493
					0.82093	0.7449	0.64523	0.56328	0.51426	0.49744	0.4552	0.43848	0.41193	0.38493	-0.372	0.36619	0.36013	-0.3467	-0.35985	-0.33424	0.34934	-0.33544	0.33355	-0.33675	0.34595	0.33853	-0.34428	0.34256	-0.34948
					0.82241	0.74498	0.64549	-0.5639	-0.51483	0.49752	0.45525	0.43872	0.41247	-0.38533	-0.37277	0.36646	0.36014	0.34677	-0.36	0.33439	-0.35011	-0.33566	0.33371	0.33733	0.34619	0.33882	0.3444	-0.34263	-0.34951
					0.82361	0.74514	0.64687	0.56437	0.51486	0.49754	0.45575	0.4394	0.41269	-0.38593	0.37285	-0.36699	-0.36028	-0.34677	0.36023	-0.33463	0.35013	0.33569	0.33384	-0.33757	0.34628	0.33924	0.34466	-0.34264	0.35043
					0.82447	-0.74633	0.64703	0.56462	-0.51523	0.4979	0.45593	-0.44014	-0.41321	0.38595	-0.37285	-0.36799	0.36036	-0.34711	0.36029	0.33518	-0.35039	-0.33607	-0.33385	-0.33762	-0.34654	0.33942	-0.3451	-0.34329	0.35047
					0.82826	0.74635	0.64711	0.56572	-0.51569	0.49821	0.45616	0.44023	-0.4139	0.38643	0.37298	0.36815	0.36046	0.34747	0.36079	0.33521	0.35065	-0.33631	-0.33414	0.33788	-0.34696	-0.33943	0.34514	-0.34337	0.35073
					-0.82839	0.74646	-0.64728	0.56649	-0.51592	-0.49852	-0.45634	0.44061	-0.41444	0.38646	-0.37335	0.36831	0.36055	-0.3488	0.36083	-0.33551	0.35067	0.33639	0.33418	0.33797	0.34705	-0.33965	0.34518	-0.34393	0.35079
					0.82897	0.7466	0.64772	-0.56793	0.51674	-0.49942	0.45703	-0.44067	0.41477	0.38746	0.37347	0.3689	-0.36067	0.34932	0.36101	0.33564	0.35069	-0.33821	0.33418	0.3387	-0.34756	0.33974	0.34527	0.34399	0.35088
					0.83015	0.74971	-0.64776	-0.56876	0.51684	0.49999	-0.4575	0.44095	0.41494	0.38818	-0.37362	-0.36897	-0.36164	-0.34955	-0.36174	0.33678	-0.35115	-0.33829	0.33429	0.33908	-0.34759	-0.34052	0.34556	0.34452	-0.35094
					0.83041	0.75084	-0.64786	0.5692	-0.51685	0.50073	0.45798	0.4411	0.41511	-0.38847	0.37372	-0.36968	0.36173	-0.34998	0.36205	-0.33703	0.35139	0.33832	-0.33433	-0.33925	0.34768	-0.34059	0.34559	-0.34459	0.35103
					-0.831	-0.75175	-0.64797	0.5693	-0.517	0.50109	0.45956	0.44155	0.4156	0.38909	-0.37428	0.37005	0.36204	0.35011	0.36214	-0.33706	-0.35158	0.33838	-0.33494	-0.33963	-0.34786	0.3406	-0.34609	0.34486	-0.35179
					0.83183	0.75234	-0.64907	0.56986	0.51762	0.50115	0.45971	0.44175	0.41571	-0.38953	-0.37441	-0.37014	-0.36254	-0.3502	-0.36222	-0.3374	0.35168	-0.33906	-0.33501	0.33994	-0.3479	-0.34076	0.34668	-0.34527	-0.35227
					0.83187	0.75262	-0.6491	0.57077	0.51794	0.50128	0.46005	-0.44185	0.41636	0.38956	0.37449	-0.37019	0.36301	0.3504	-0.36226	-0.33751	-0.35168	-0.33926	0.33503	0.34021	-0.3481	0.34134	0.34681	0.34581	0.35239
					0.83322	0.75285	0.65003	0.57086	-0.5182	-0.50173	0.46007	0.44219	0.41645	-0.3906	-0.37476	-0.37062	0.36333	-0.3509	-0.36232	0.33776	-0.3517	-0.33989	0.3351	0.34036	0.34841	0.34163	0.34683	0.34608	0.35262
					0.83418	0.75293	0.65032	-0.57089	0.51831	0.50218	0.4601	-0.44239	0.4166	0.39086	0.37486	-0.37063	0.36452	0.35132	-0.36268	0.33786	0.35213	0.33995	0.33554	0.34039	0.34844	0.34166	-0.34713	0.34625	0.35332
					-0.8346	0.753	0.65078	-0.57133	0.51888	0.50257	0.46069	0.44259	-0.41661	0.39148	0.37505	0.37149	-0.36458	-0.35139	0.36286	0.33796	0.35287	0.34013	-0.33583	-0.34065	0.34853	-0.34231	-0.34718	-0.3466	0.35353
					0.83508	0.75628	-0.65209	0.57173	0.51939	0.50268	0.46087	-0.44289	0.41731	0.39195	0.37544	-0.37185	0.36512	0.35226	-0.36295	0.33804	0.35371	0.34033	0.33608	0.3408	-0.34874	0.34269	0.34738	-0.347	-0.35355
					0.83518	-0.75784	0.65332	-0.57218	-0.51963	0.50317	-0.46216	0.443	-0.41739	-0.39327	-0.37659	0.37214	0.3653	-0.35268	-0.36299	0.33811	-0.35392	-0.34056	0.33608	0.34141	0.34875	-0.34303	0.34759	-0.34717	0.35362
					0.83536	0.75801	0.6546	0.5738	-0.52075	0.50354	-0.46246	0.44363	-0.41755	-0.39335	0.37676	-0.37246	-0.36558	-0.35332	-0.36311	0.33821	-0.3547	-0.34087	-0.33656	-0.34199	0.34876	0.34315	-0.34759	0.34722	0.35374
					-0.83571	0.75819	0.65784	0.57386	0.52147	0.50364	-0.463	0.44392	0.41772	0.39386	0.3768	-0.37315	0.36623	0.3536	0.36366	-0.33824	0.35471	0.3411	-0.33729	0.34273	0.34894	0.34338	0.34768	-0.34736	0.35384
					0.83598	0.75899	0.65795	0.57412	-0.52191	0.50372	-0.46316	0.4451	-0.41896	-0.39386	0.377	0.37343	0.36645	0.35428	0.36374	0.33861	-0.35471	-0.34162	-0.33755	0.34277	-0.34905	-0.34377	0.34778	0.34832	0.35389
					0.83701	-0.75937	-0.65796	0.57468	0.52196	-0.5039	0.46338	-0.4461	-0.41914	-0.39401	-0.37735	0.37382	-0.36703	0.35428	0.36421	-0.33885	0.35537	0.34222	-0.33784	0.34282	0.34942	0.3438	0.34823	-0.34838	-0.35396
					0.83761	0.76057	0.65851	0.57476	0.52284	-0.50403	0.46371	0.44632	0.41987	0.39404	0.3782	-0.37454	0.3673	-0.35429	0.36438	0.3395	-0.35556	0.34257	0.33797	-0.34289	0.34952	0.34395	0.34838	0.34864	-0.35435
					0.83791	0.76088	0.65855	0.57489	0.52301	0.50466	-0.4639	-0.44633	-0.42009	0.3945	0.37858	0.37533	0.36756	0.35438	0.36451	0.33988	0.35601	0.34269	-0.33799	-0.3432	-0.34969	0.34416	0.3484	-0.34867	-0.35484
					0.83803	0.76156	0.66083	-0.57505	-0.52306	0.50508	-0.46462	0.44648	0.42024	-0.39477	0.37897	0.37539	0.3678	0.35465	-0.36471	-0.33993	0.35643	-0.34311	-0.33812	0.3433	0.34979	-0.34416	0.34841	-0.34925	-0.35489
					0.83871	0.76235	-0.6612	-0.57512	-0.52333	0.5054	-0.4652	0.44655	-0.42037	0.39523	0.37973	-0.37566	0.36828	0.35465	-0.36487	-0.34007	0.35655	0.34312	-0.3382	0.34335	-0.3502	-0.34446	0.34868	-0.34941	0.35493
					-0.83886	0.76256	0.66215	-0.57555	0.52337	-0.50571	0.46564	0.44677	0.4213	0.39552	-0.38012	0.37671	0.36847	-0.35486	-0.36504	0.34049	0.35685	0.34321	-0.3384	0.34339	0.35052	0.3452	-0.34893	0.3497	-0.3556
					0.84034	0.76263	0.66222	0.57596	-0.5235	0.50644	0.46663	-0.44677	-0.42232	0.39579	-0.38034	0.37716	0.36857	-0.3549	0.36511	0.3406	0.35705	0.34335	0.33859	-0.34357	0.35085	0.34602	0.34931	-0.34973	0.35574
					0.84172	-0.76265	0.66258	-0.57614	0.52439	-0.50657	-0.46679	0.44746	-0.42236	0.39586	0.38096	-0.3775	0.36912	-0.35497	-0.36532	-0.34079	0.35765	0.34339	-0.33863	-0.34369	0.35142	-0.34609	0.34972	-0.34984	-0.3563
					0.84363	0.76327	0.6634	0.57617	0.52506	-0.50657	0.46689	0.44764	0.42292	-0.39626	0.38101	-0.37791	0.36918	0.35514	-0.36623	-0.34199	-0.35765	0.34355	-0.33907	-0.34408	-0.35157	0.34616	-0.34988	0.35	0.35631
					0.84388	-0.76352	0.66389	0.57645	0.52542	0.5072	0.46716	-0.44773	0.42293	0.39631	0.38145	-0.37827	0.36957	0.35526	-0.36627	-0.34213	0.35789	0.34358	-0.33908	0.34437	0.35171	-0.34626	0.35	0.35021	0.35677
					0.84483	-0.7646	0.66447	-0.57655	-0.52549	0.50772	-0.46731	0.44844	0.42352	0.39671	0.38202	0.37846	0.37	0.35563	-0.3664	-0.34229	-0.35795	0.344	-0.33911	-0.34441	0.35201	0.34641	-0.35034	-0.3503	0.3568
					-0.84548	-0.7647	0.66533	0.57678	0.52589	0.50805	-0.4677	-0.44865	-0.42355	0.39735	-0.38241	0.37859	0.37025	-0.35574	0.36687	0.34286	-0.35836	0.34404	0.3393	-0.34487	-0.35201	0.34649	0.35045	0.35126	-0.35729
					0.84664	0.76638	0.66572	0.57709	-0.52596	-0.50838	-0.46772	0.44875	-0.42359	0.39751	0.38253	0.37875	-0.37038	-0.3559	0.36713	-0.34305	0.35844	0.34439	0.33934	-0.34551	0.35204	0.34654	-0.3507	-0.35136	0.35738
					0.84752	0.76654	0.66701	0.57751	-0.52678	-0.50846	0.46786	-0.44879	0.42402	-0.39763	0.38285	0.37889	-0.3707	-0.35622	-0.36725	-0.34333	-0.35862	0.34472	0.33983	0.34613	-0.35258	-0.34665	0.35105	-0.35159	-0.3574
					0.84841	-0.76672	0.66708	0.57812	-0.52725	0.51013	0.46858	0.44922	0.42435	0.39785	-0.38352	-0.37896	-0.37073	-0.35632	-0.36733	-0.34335	0.35868	0.34485	0.3401	-0.34632	-0.35327	0.34715	-0.35117	0.35236	-0.35741
					0.84855	0.76719	0.66749	0.57822	0.52738	0.51076	0.46934	0.45017	-0.42466	-0.39856	0.38606	0.37965	0.37081	0.35711	0.36762	0.3437	-0.35873	-0.34496	0.34059	0.34634	0.3535	-0.34729	0.35135	-0.35241	-0.35833
					0.84897	0.76841	0.6675	0.57862	0.52755	0.51123	-0.46955	0.45036	0.42512	-0.3996	-0.38641	0.37967	-0.37118	-0.35711	0.36765	-0.34382	0.35883	0.34497	0.34063	0.3466	-0.35359	0.34871	0.35139	0.35266	0.35936
					0.85022	0.76912	-0.66766	-0.57909	0.52794	-0.5113	0.47002	-0.45053	-0.42531	0.39972	0.38653	-0.37973	0.37159	-0.35737	-0.36798	-0.34385	0.35887	0.345	-0.34078	0.34671	0.35365	-0.34902	0.35143	-0.3529	-0.3599
					0.85077	0.77089	0.6685	0.57921	0.52883	-0.5115	-0.47009	0.4511	-0.42535	-0.39987	0.38668	0.37978	-0.37167	-0.35772	-0.36818	0.34425	-0.35942	0.34513	0.34102	0.34712	-0.35403	0.34912	-0.35146	0.3531	-0.36011
					0.85181	0.77156	0.66899	0.57951	-0.52938	-0.51153	-0.47028	-0.45141	0.42536	0.39998	0.38678	-0.3803	0.37184	0.35773	0.36823	0.34434	-0.3598	0.34526	0.34122	0.34749	0.35419	-0.34913	-0.35152	-0.35333	0.36031
					0.85245	0.77221	0.6692	0.58107	-0.52955	0.5123	-0.47039	-0.45146	-0.42709	-0.40003	-0.38754	-0.38271	-0.37299	-0.35801	-0.36834	0.34439	0.3599	-0.34573	-0.34197	0.34783	0.35433	0.34926	0.35173	-0.35342	0.36053
					0.8535	0.77274	0.67163	-0.58224	-0.53011	-0.51304	0.47044	-0.4522	0.42803	0.40012	0.38782	-0.38287	0.37394	0.35978	0.36847	0.3446	-0.35996	0.34607	0.34214	-0.34784	0.35435	0.35025	-0.35176	0.35396	-0.36092
					0.85374	0.77419	-0.67203	0.58268	-0.53042	0.5132	0.47069	-0.4529	0.42805	-0.40034	0.38857	-0.38325	0.37425	-0.36009	-0.36871	-0.34533	-0.36011	-0.34608	-0.34253	0.34849	-0.35538	-0.35032	-0.3524	-0.35399	-0.36131
					0.85454	0.77479	0.67238	-0.58422	0.53092	-0.5141	0.47079	-0.45292	0.4282	0.40035	0.38935	0.38326	0.37431	0.36023	-0.36907	-0.34574	-0.36014	0.3463	0.34341	-0.34855	-0.35574	-0.35075	0.35276	0.35434	0.36154
					0.85598	0.7755	0.67248	0.58438	-0.53102	0.5147	-0.471	-0.45327	0.42836	-0.40118	0.38989	-0.38355	0.37505	-0.36045	0.36936	0.34591	-0.36026	0.34656	0.3436	0.34913	-0.35604	0.35078	0.35313	0.35435	0.36164
					-0.85715	0.77639	0.67256	0.58464	-0.53123	0.51549	0.47107	-0.45394	-0.42857	0.40237	0.39009	-0.38355	-0.3751	0.36057	0.36971	-0.34612	0.36041	0.34674	0.34381	0.34945	0.35614	-0.35109	-0.35356	0.35442	0.36188
					0.85717	0.77731	0.67356	0.58481	0.53133	-0.51566	0.47109	0.45477	-0.42931	0.40259	-0.39061	0.38381	-0.37514	0.36099	-0.36992	0.34615	0.36067	-0.34759	-0.34389	0.34958	0.35617	-0.35132	0.35389	-0.35504	-0.36229
					0.85728	0.77849	0.67386	0.58558	0.53213	-0.51571	0.4714	0.4553	-0.42933	0.40315	0.39062	-0.38424	0.37566	-0.36147	0.37004	0.34675	0.36128	-0.3482	-0.34396	0.35024	-0.35625	0.35154	-0.35391	-0.35513	0.36243
					0.85752	-0.77872	0.67475	-0.58591	0.53248	0.51586	0.47168	0.45592	0.42944	-0.40343	0.39069	-0.38545	0.37572	-0.36245	0.37021	0.34692	0.3613	-0.34883	-0.34398	0.35039	0.35639	-0.35186	-0.35433	0.3552	-0.3629
					0.86	0.77958	0.67582	-0.58601	0.53412	0.51642	0.47202	0.45603	-0.42966	0.4041	0.39076	0.38568	-0.37594	-0.3625	-0.37022	-0.34701	-0.36158	0.34895	0.34448	0.3505	-0.35643	0.35202	0.35452	-0.35606	-0.36302
					-0.8602	0.77962	0.67656	0.58602	-0.53412	0.51673	-0.4721	0.45635	0.42992	0.40529	0.39102	0.3857	-0.37599	0.36252	-0.37057	-0.34705	0.36165	0.34895	-0.34463	-0.35073	0.35681	-0.35217	-0.35499	-0.35647	-0.36302
					0.86062	0.78029	0.6773	0.58629	0.53433	0.51676	0.47219	-0.45646	0.42998	-0.40532	0.39108	-0.38612	0.37627	0.36267	0.37067	0.34728	-0.36261	0.34961	-0.3448	0.35086	-0.35681	0.35248	0.35528	0.35662	0.36352
					0.86165	-0.78102	0.67845	0.58659	-0.53434	-0.51699	-0.4726	0.45775	-0.43024	0.40552	0.39171	-0.38651	0.37636	0.36289	-0.37091	-0.34777	0.36271	0.34963	-0.34482	0.35103	0.35691	-0.35255	0.35555	0.35684	-0.36367
					0.86248	0.78143	0.67908	0.58765	0.53456	-0.51739	0.47333	-0.45789	-0.43076	0.4056	-0.39175	0.38676	0.37639	-0.36307	0.37138	-0.34814	-0.36293	-0.35001	0.34522	0.3514	0.35712	0.35279	0.35563	-0.35708	0.36478
					0.86253	0.78187	0.67952	-0.58815	0.53459	-0.51774	-0.47344	0.45817	-0.43081	0.40563	0.39179	0.38715	0.37667	0.36324	0.37166	-0.34827	-0.36298	-0.35047	0.34539	-0.35224	0.35809	-0.35291	-0.35577	0.35733	-0.36489
					0.86331	-0.78188	0.68102	0.58834	0.53492	-0.51774	-0.47364	0.45895	0.43085	0.40574	-0.39201	-0.38729	0.37678	-0.3637	0.3722	-0.34833	0.36325	0.35074	0.34577	-0.3528	0.35849	0.35298	0.35587	-0.35733	0.36507
					0.86338	0.78199	-0.68152	-0.58917	0.53603	0.51804	0.47406	0.45901	-0.43134	0.40578	-0.39213	0.38746	-0.37757	0.36387	-0.37277	0.34837	-0.36345	-0.35079	0.34597	0.35292	0.35879	0.35337	-0.35719	-0.35762	0.36507
					0.86373	-0.78268	0.68174	0.58939	0.53604	0.5184	-0.47484	0.45986	0.43151	-0.40615	0.39214	0.38766	0.37842	-0.36393	0.37285	0.34879	-0.36376	0.35082	-0.34677	-0.35326	-0.3591	0.35349	0.35727	-0.35771	-0.3651
					0.8638	0.78278	0.68199	0.58956	0.53616	0.51841	-0.47488	0.45988	-0.43214	-0.40632	0.39227	-0.38849	-0.37883	-0.36424	0.37308	0.3489	0.36377	0.35095	-0.34679	-0.35338	0.35943	0.35378	-0.35773	-0.35795	0.36533
					0.86384	0.78319	-0.68202	0.58957	-0.53671	0.51851	0.47498	0.46022	0.43274	-0.40654	0.39243	0.3897	0.37937	-0.36458	-0.37358	-0.34895	-0.36385	-0.35097	0.34727	-0.35343	0.35943	0.35394	-0.35776	0.35826	-0.3654
					0.86448	0.7836	0.68219	-0.58958	0.53687	0.51868	0.47538	-0.4609	0.43313	0.4068	0.39246	0.38975	-0.37938	0.36486	-0.37385	0.34911	0.36421	0.35125	-0.3473	0.35345	-0.35982	-0.35413	-0.35794	-0.35915	-0.36592
					0.86513	0.78418	0.68277	-0.58975	0.53822	0.51909	-0.47552	-0.46129	-0.43319	0.40719	0.3926	0.39035	-0.37949	-0.36492	0.3741	-0.34914	-0.36433	-0.35147	-0.34747	0.35417	-0.36004	-0.3544	-0.35816	0.35933	-0.36604
					0.86536	0.78455	0.68317	0.59026	0.53854	-0.51919	-0.47583	0.46153	0.43367	0.40736	0.39308	0.39063	0.3799	0.365	-0.37449	0.34998	-0.36495	0.35167	-0.34885	-0.35502	-0.36016	0.35477	0.35852	-0.35963	0.36615
					0.86558	0.78462	-0.68358	0.59204	0.53955	0.51932	-0.47586	-0.46157	-0.43371	0.4077	-0.39314	-0.39083	-0.37992	0.36537	0.3751	-0.35005	0.36497	-0.35176	0.34953	-0.35519	0.36024	-0.35491	0.35873	-0.35972	-0.3665
					0.8664	0.78467	0.68472	0.59253	-0.5396	0.52051	-0.47599	0.46233	0.43408	0.40805	-0.39425	-0.39096	0.38027	0.36581	0.37531	-0.3504	-0.365	-0.35191	0.34969	0.3553	0.36071	-0.35506	-0.35877	0.3601	0.36732
					-0.86779	0.78472	0.68519	0.59285	0.53987	-0.52072	0.47622	-0.46298	-0.43448	-0.40831	-0.39448	0.39118	-0.38045	0.36589	-0.37547	-0.35045	0.36521	0.35195	-0.35012	0.3555	0.36073	0.35531	-0.35885	-0.36063	0.3677
					0.87042	0.7849	-0.6862	0.59321	0.54026	0.52094	0.47649	0.46354	-0.43461	-0.40855	-0.39517	0.39218	-0.38079	0.366	0.37566	-0.35083	-0.36523	-0.35236	-0.35059	-0.35577	0.36082	0.35577	-0.3594	0.36065	-0.3679
					0.87103	0.78608	0.68654	0.59447	0.5404	0.52141	0.47669	-0.46384	-0.43489	0.40859	0.39599	0.39288	0.38083	-0.36622	0.37581	-0.35093	0.36586	0.35338	-0.35061	-0.356	-0.3609	0.35577	0.36043	-0.36106	-0.36793
					0.87228	0.7873	0.68681	0.59466	0.5421	-0.52172	0.47712	0.46403	0.43502	-0.40878	-0.3973	0.39312	-0.38184	0.36644	0.37668	0.35097	0.36612	-0.35372	0.35128	0.35719	-0.36095	0.35628	0.36061	-0.36141	-0.36812
					0.8736	0.78742	0.68716	-0.59508	0.54225	-0.52177	-0.4772	0.46411	-0.43568	0.4089	0.39797	-0.39322	0.38206	0.3668	0.37697	0.35136	0.36616	-0.35377	0.35159	-0.35722	0.36097	0.35669	-0.3607	-0.36206	0.36822
					0.87417	0.78746	0.68723	-0.59581	-0.54249	0.52273	0.47815	-0.46418	0.43577	0.40902	0.39883	0.39415	0.38225	0.36699	-0.37703	-0.35136	0.36688	-0.35392	-0.35184	-0.35729	0.3614	-0.35691	-0.36077	-0.36213	-0.36838
					0.87465	0.78753	0.6875	-0.59628	0.54307	-0.52375	0.47826	0.46423	0.436	0.40927	-0.39897	0.39426	-0.38292	0.36734	-0.37733	0.35251	0.36737	-0.35448	0.35222	-0.35758	-0.36162	0.357	0.36079	0.36273	0.36841
					0.87648	0.78794	-0.68756	0.59826	-0.54319	-0.52384	-0.47898	0.46445	-0.43606	0.4097	0.3993	0.39459	-0.38301	-0.36747	0.37795	-0.35277	-0.36764	-0.35452	0.35241	0.35794	0.36181	-0.3571	-0.36082	-0.36294	-0.36883
					0.87659	0.78898	0.68825	0.59839	0.54503	0.52466	-0.47978	0.46542	-0.43608	0.41044	0.3995	0.39476	0.38326	-0.3678	0.37797	-0.35314	0.36765	0.3546	-0.35241	-0.35818	-0.36191	0.35718	-0.36098	-0.36312	0.36921
					0.87665	0.78921	0.69008	0.59846	0.54583	0.52518	0.4799	0.4662	0.43628	0.41085	0.40053	0.396	0.38353	0.3682	0.3788	0.35322	0.36782	0.35508	-0.35293	-0.35852	-0.36244	0.35731	0.36101	0.36324	-0.36981
					0.87665	0.78943	0.69051	0.60111	-0.54608	-0.5255	-0.4803	0.4664	0.43785	0.411	0.40068	0.39649	-0.38364	0.36825	0.37887	-0.35327	-0.36873	-0.35511	0.35298	0.35862	-0.36262	-0.35735	0.36119	-0.36339	0.36992
					0.87745	0.79	0.69052	-0.60225	0.54634	0.52566	0.48121	-0.46689	-0.43806	-0.4113	0.40107	0.39666	-0.384	0.36831	-0.37891	0.35339	0.36933	0.35524	0.35341	0.35922	-0.36268	0.35862	-0.36128	0.36346	-0.37058
					0.87764	0.79037	-0.69053	0.6025	-0.54754	-0.52599	-0.48136	0.4672	-0.43832	-0.41152	0.40108	0.39668	-0.38414	-0.36851	0.37937	0.35356	0.36941	0.35607	0.35396	-0.35932	0.36289	-0.3589	-0.36131	0.36364	0.37082
					-0.88026	0.7906	-0.69134	0.60297	0.5478	0.52616	0.48184	-0.46743	0.43835	-0.41205	0.40134	0.39764	0.3842	-0.37085	0.37979	-0.35382	-0.36947	-0.35655	0.35418	0.3596	0.36343	-0.35911	-0.36138	-0.36386	0.37145
					0.88086	0.79065	0.69197	-0.60397	0.54785	-0.52702	-0.48201	0.46815	-0.43892	0.41228	-0.40206	0.39778	-0.38462	0.37102	0.37987	0.35404	-0.36985	0.35696	-0.35469	0.35972	0.36345	0.35919	-0.36146	-0.36417	-0.37172
					0.88086	0.79335	-0.69206	0.60468	0.54837	0.52747	0.48217	-0.46853	0.43933	0.4124	0.40215	-0.39779	0.3848	-0.37118	0.38005	0.35435	0.36988	-0.35696	-0.35471	-0.36024	0.36353	0.35964	0.36192	0.36435	0.37199
					0.88103	0.7942	0.69303	-0.60477	0.54896	-0.52781	-0.48284	-0.46889	-0.43935	0.41285	0.40221	-0.39794	0.38577	-0.37163	0.38015	-0.35493	0.36988	-0.35715	-0.35486	-0.36067	0.36371	0.35974	0.36199	-0.36446	-0.37222
					0.88141	0.79436	0.69333	-0.60488	0.54905	0.52793	0.48312	0.46916	-0.43997	-0.41318	0.40235	0.39804	0.38588	0.3717	-0.38028	-0.35498	0.36994	-0.3575	0.3552	-0.36087	-0.36376	-0.36006	-0.36199	0.36454	-0.37309
					0.88141	0.79476	0.69363	-0.60494	-0.55002	0.52793	-0.48352	0.4692	-0.44045	-0.41331	0.40246	0.39811	0.3859	0.37191	-0.3804	0.35535	-0.37028	0.35885	0.35536	-0.36088	-0.36393	0.36007	-0.3621	-0.3646	-0.37325
					0.88178	0.79498	-0.6947	-0.60528	-0.55063	-0.52859	-0.48356	-0.4692	0.44063	0.41399	0.40255	-0.39862	0.38609	0.37194	-0.38067	-0.35567	0.37074	0.35928	0.35554	-0.3609	0.36421	-0.36018	-0.36274	0.36471	0.37377
					0.88201	0.79566	-0.69495	-0.60642	-0.55145	0.52861	-0.48372	0.46929	0.44065	0.41449	-0.40295	-0.39876	-0.3862	-0.3722	-0.38091	0.35578	0.37088	-0.35929	0.35597	0.36143	0.36428	0.36043	0.36292	0.36488	0.37471
					0.88348	0.7961	0.6962	0.60685	0.55177	-0.52995	0.48378	-0.46931	-0.44068	0.41458	0.40404	0.39912	0.3867	-0.37238	0.38099	0.35632	0.3712	0.35962	-0.35619	-0.36168	0.36438	0.36051	-0.36313	0.3652	-0.37519
					0.88368	0.79627	-0.69644	-0.6082	-0.55188	-0.53031	0.48381	0.46932	-0.44089	-0.41467	-0.40427	0.39923	0.38692	-0.37289	-0.3816	0.35689	0.37129	0.35962	0.35627	0.36171	-0.36438	0.36059	-0.36331	0.3653	-0.37543
					0.88486	0.79757	0.69819	0.61028	-0.55217	-0.53059	0.48387	0.47048	0.44094	0.41488	-0.40429	0.39955	0.38764	-0.37326	0.38185	0.35726	0.37152	-0.36045	0.35647	0.36179	-0.3644	-0.36108	0.36364	0.36549	-0.37552
					0.88512	-0.79815	0.69962	0.61108	0.55218	0.53066	-0.48424	-0.47072	-0.44127	0.4154	-0.40448	0.40015	0.3882	-0.37326	-0.38211	-0.35752	0.37157	0.36059	0.35682	-0.36203	-0.3647	-0.36127	0.36369	-0.36581	0.37574
					0.88743	0.79905	-0.70038	-0.61216	0.55219	0.5307	0.4845	-0.47103	0.44187	0.41554	-0.40467	0.40064	-0.3882	-0.37354	0.38219	0.35776	-0.3722	0.36079	0.35711	0.36355	-0.3648	0.36131	0.36376	0.366	0.37597
					0.88772	0.79915	0.70053	0.61305	-0.55219	0.53072	-0.4845	0.47115	0.44245	-0.41559	0.40496	-0.40081	0.3886	-0.37429	0.38243	0.35786	0.37236	0.3616	0.35718	0.36374	-0.36512	0.36172	0.36381	-0.36602	0.37597
					0.88783	0.79938	0.70075	0.61313	0.55267	0.5311	0.48464	0.47121	0.44256	0.41564	0.4052	-0.40086	0.38878	-0.37469	0.38285	-0.35828	-0.37252	-0.36197	-0.35742	0.36381	0.36692	-0.36244	0.36433	-0.36605	-0.37604
					0.88803	0.79949	0.70089	0.61339	0.55306	0.53136	-0.48468	0.47123	-0.44351	0.41568	0.40531	0.4015	-0.38941	-0.37513	0.38307	-0.3583	0.37253	-0.36249	-0.35771	0.36381	-0.36701	0.3626	0.36523	-0.36652	-0.3764
					0.88861	0.79973	0.70161	0.6136	0.55356	0.53156	0.48473	-0.47146	-0.44356	0.41705	-0.40548	-0.40154	-0.38991	0.37537	-0.38362	-0.35836	-0.3727	-0.36271	0.35797	-0.36392	0.36729	0.36334	0.3653	0.36655	0.37756
					0.88948	0.80242	0.7025	0.61417	0.55409	0.53171	-0.48521	-0.47181	-0.44411	0.41707	-0.40565	0.40155	0.39024	0.37591	0.38408	0.35843	-0.37294	-0.36289	-0.35801	-0.36414	-0.36804	0.36352	0.36539	0.36689	0.3777
					0.89017	0.8025	-0.70311	0.6145	-0.55451	0.53194	0.48527	0.47226	-0.44476	0.4174	0.40589	-0.40246	0.39054	0.37691	0.38416	-0.35843	-0.37336	-0.36289	0.35849	0.36415	0.36887	-0.36379	-0.36574	0.36689	0.37797
					0.89045	0.80303	0.70421	0.61595	0.55452	0.53208	-0.48579	0.47259	0.44522	0.41741	0.40625	0.40341	-0.39123	0.37744	-0.38447	-0.35904	0.37446	0.36298	0.35866	0.36437	-0.369	-0.36443	0.36602	-0.36708	-0.37811
					0.89279	0.8032	0.70454	0.61628	-0.55458	0.53313	-0.48662	-0.47292	-0.4453	0.41763	-0.40706	0.40356	0.39166	0.37785	0.38466	-0.35907	-0.37451	0.36415	-0.3587	-0.36438	-0.36905	0.36488	-0.36609	-0.36781	0.37844
					-0.89438	0.80455	-0.70568	0.6163	-0.55556	-0.53441	0.48678	0.4731	0.44538	-0.41782	0.40751	0.40386	-0.39189	-0.37785	-0.38489	-0.35951	0.37474	-0.3642	-0.35907	0.36464	0.36924	0.36495	-0.36653	0.36784	0.37855
					0.89662	0.80465	0.70669	0.61756	-0.55558	-0.53499	-0.48706	0.47313	0.44554	0.41833	-0.4076	0.40404	0.39207	-0.37791	0.38518	0.36008	-0.37535	-0.36453	0.35917	0.36476	0.36982	0.36516	-0.36702	0.36818	-0.37879
					0.89705	0.80491	-0.70697	0.61798	0.55567	-0.5353	0.4877	0.47396	0.44558	-0.41925	0.40793	-0.40411	0.39279	-0.37792	-0.38527	-0.3602	0.37537	-0.36483	0.35939	0.36495	-0.37051	-0.36544	-0.36735	0.36833	0.379
					0.89718	0.80494	0.70783	0.61861	0.55573	0.53606	0.48781	0.474	0.44559	0.41997	-0.40804	-0.40422	0.39312	0.37799	0.38539	0.36078	0.37566	-0.36484	-0.35941	0.36512	-0.37115	0.36559	-0.36767	0.36859	-0.3794
					0.89759	0.80538	0.70817	0.61909	0.55629	-0.53704	-0.48785	-0.47426	-0.44562	-0.42012	0.40814	-0.4046	-0.3932	0.37812	0.3863	0.36103	-0.37573	-0.36525	-0.35966	0.36619	-0.37145	-0.36737	0.36775	0.369	-0.37993
					0.89964	0.80572	0.70821	0.61937	0.55766	0.53808	0.48844	0.47481	0.44618	-0.42073	0.40846	-0.40486	0.39373	0.37818	0.38681	-0.36153	0.37574	0.36573	-0.35986	0.3665	0.37156	-0.36742	0.36828	0.36996	-0.3801
					0.89996	-0.80644	0.70837	-0.62041	0.5581	0.53822	-0.4886	0.47508	-0.44683	-0.42202	-0.40862	-0.4049	-0.39381	-0.37835	-0.38683	0.36198	-0.37605	0.36633	-0.36054	-0.36733	-0.37166	0.36812	0.3683	0.37072	0.38068
					0.90052	-0.80921	0.70868	-0.62156	0.55874	0.53833	0.48886	0.4751	-0.44692	-0.42234	-0.40895	-0.40492	0.3949	0.37978	-0.38724	0.36236	0.37669	0.3666	0.3606	-0.36736	-0.3717	-0.3682	0.36872	0.37114	-0.38083
					-0.9008	0.80927	0.70906	0.62171	-0.55951	0.53848	0.48897	0.47514	0.44739	0.42235	0.40951	-0.40498	-0.39497	0.37993	0.38791	-0.36238	0.37678	-0.36663	0.36065	-0.36753	-0.37171	-0.36838	-0.36888	-0.37135	-0.38086
					0.90102	-0.80984	0.70993	0.62202	0.56	0.53928	-0.48937	-0.47538	-0.44744	0.42341	-0.40968	0.40505	0.39622	-0.38012	-0.38821	-0.36271	-0.37715	0.3667	-0.36089	0.36781	0.37184	0.36872	-0.36908	0.37166	-0.38151
					-0.90173	0.8101	0.71006	0.62268	-0.56079	-0.53972	0.48945	-0.47665	0.44823	0.42341	-0.4097	-0.40533	0.39685	0.38028	-0.38912	0.36276	-0.37726	-0.3677	-0.36108	-0.36824	0.37189	0.36891	0.36927	-0.37169	0.38164
					0.90219	0.81044	-0.71014	0.62319	0.56118	-0.54005	-0.4902	-0.47701	0.44833	0.42438	-0.40978	-0.40538	0.39723	-0.38103	0.38985	0.36286	0.37766	-0.36772	-0.36115	-0.36832	-0.3719	-0.36909	0.36953	-0.37206	0.38184
					0.90296	0.81132	0.71031	0.62325	0.56139	-0.54156	-0.49042	-0.47731	-0.44834	-0.42441	0.40997	-0.40574	0.39789	-0.38104	-0.3899	0.36318	-0.37792	0.36783	-0.36154	0.36856	-0.37191	0.36911	-0.36958	-0.37292	0.38184
					0.90319	0.81138	0.71047	0.62365	0.56185	0.54199	-0.49055	0.47739	0.44846	-0.4249	-0.41043	0.40615	-0.39811	0.38142	-0.3906	0.36351	-0.37857	0.36809	0.36172	0.36919	-0.37219	0.36934	0.36975	0.37382	0.38189
					0.90349	-0.81267	-0.71197	0.6242	0.56245	-0.54207	0.49334	-0.47762	-0.44876	-0.42495	0.4105	0.40625	-0.39811	0.38145	0.39114	0.36363	0.37909	-0.36814	-0.36203	-0.36956	0.37228	-0.36988	-0.36988	0.37446	-0.38239
					0.90388	0.81299	0.71216	-0.62667	0.56249	0.5422	-0.49354	0.47822	-0.44952	0.4254	0.41057	-0.40643	-0.39834	0.38175	0.39163	-0.36382	0.3791	0.36818	-0.36234	-0.36957	0.37261	0.37002	-0.3702	-0.3752	0.38255
					0.90517	0.81316	0.71297	0.62724	0.5636	-0.54253	0.49376	-0.47826	-0.4504	0.42605	-0.41065	-0.40652	0.3986	0.38248	-0.39212	0.36472	-0.37933	-0.36837	-0.36299	0.3697	0.37277	0.37034	-0.3703	-0.37521	-0.38287
					0.90554	0.81338	0.71353	-0.62728	0.56376	-0.54276	0.49497	0.47831	0.45049	-0.42615	0.41081	-0.40718	-0.39884	0.38285	0.3923	0.36554	0.37972	0.3686	0.36301	0.3701	0.37326	-0.37064	0.37057	-0.37531	-0.38318
					0.90561	0.81396	-0.71406	0.62742	0.56407	-0.54322	0.49512	-0.47839	0.45067	0.42705	0.41107	-0.40784	-0.39981	-0.38303	-0.39344	0.36593	-0.37985	-0.36881	0.36319	0.37016	0.37338	0.37112	-0.37073	0.37558	0.3833
					0.90575	0.81402	0.71463	0.62755	0.56428	-0.54354	0.49526	-0.4785	-0.45083	-0.4271	-0.41109	0.40814	0.40004	0.38338	-0.39374	0.36624	0.38049	0.36887	-0.36325	0.3702	-0.37433	0.37152	-0.37097	0.37559	-0.38352
					0.90699	0.81426	0.71473	0.62821	-0.56527	0.54362	0.49555	0.47897	-0.45098	0.42797	0.41118	-0.40875	-0.40019	0.38338	0.39384	0.36638	0.38079	-0.36905	0.36368	0.37067	0.37495	-0.37152	-0.37112	0.37572	-0.38364
					0.90821	0.8143	0.71486	0.62874	0.56531	-0.54413	0.49653	-0.48022	-0.45157	0.42799	0.41134	0.4089	0.40021	-0.38377	0.39395	0.36686	0.3813	0.36983	-0.36389	-0.3707	-0.37542	-0.37177	0.37123	-0.37575	0.38387
					0.90931	-0.81471	0.71498	0.62875	0.56635	0.5444	-0.49725	0.48066	0.45164	0.42821	-0.41166	0.40918	0.40027	-0.38448	-0.39404	0.36695	0.38131	-0.36993	-0.36407	0.37094	0.37551	-0.37235	0.37126	0.37596	-0.3839
					0.91023	0.81533	0.71591	0.6291	0.56638	-0.54485	0.49744	0.48261	0.45197	-0.42848	0.41229	0.40921	0.40083	0.38458	0.39405	0.36715	-0.38162	0.37022	-0.36409	0.37096	-0.37575	0.37239	0.37147	0.3761	0.38403
					0.91049	0.81568	-0.71602	0.62925	0.56786	0.54486	-0.49747	0.48269	-0.4528	0.4287	0.41236	0.40945	0.40123	0.38506	0.39417	-0.3678	0.38164	0.37072	0.36448	0.37133	-0.37595	0.37315	0.37158	0.3763	-0.38434
					0.91098	0.81617	0.71619	-0.62935	0.56798	0.54492	0.49797	0.483	0.45383	0.4292	-0.41255	0.40946	0.40138	0.38524	-0.39422	0.36839	-0.38219	0.37125	-0.36452	0.37158	-0.37599	-0.37412	0.3716	-0.37644	0.3844
					0.91195	-0.81701	-0.71685	0.6295	0.568	0.54536	-0.49863	0.48308	0.45445	0.4293	-0.41289	0.40975	-0.40143	0.38548	-0.39428	0.36951	0.38247	-0.37137	0.36582	0.37162	-0.37605	-0.37426	0.37181	-0.37646	-0.38481
					0.9138	0.82019	0.71741	0.62978	-0.56872	0.54552	0.49897	-0.4836	-0.45469	-0.42939	-0.41388	0.41012	-0.40163	0.38562	-0.3943	-0.37024	0.38253	-0.37144	-0.36586	0.3717	0.37636	0.37506	0.37198	-0.37704	-0.38489
					0.91499	0.82048	0.71759	0.6308	0.56938	-0.54556	0.49915	0.4837	0.45471	0.42953	0.41421	0.41038	-0.40192	-0.38574	0.39461	-0.3715	0.38279	0.37164	0.36613	0.37192	-0.37741	-0.37525	-0.3727	0.37723	0.38506
					0.91622	0.8216	0.71767	-0.63098	-0.5695	0.54563	-0.49927	-0.48413	-0.45472	-0.4297	-0.41481	0.41042	-0.40212	0.3858	0.39468	0.37251	0.38307	-0.37168	-0.36642	-0.37194	0.37755	-0.37548	0.37277	0.37735	0.38529
					0.91802	-0.82191	0.71888	0.63109	0.56957	-0.54571	-0.50004	0.48416	-0.4557	-0.43025	0.41534	0.41068	0.40258	0.38642	0.39472	0.37326	-0.38332	0.37224	-0.36699	-0.37219	0.37765	-0.37574	0.37284	-0.37757	-0.38588
					0.92253	0.8221	-0.71978	0.63123	0.56958	0.54578	-0.50023	0.485	-0.4557	0.43029	-0.41657	-0.41084	0.40286	0.38648	0.39473	-0.37351	-0.38346	0.37232	0.36731	-0.37252	0.37799	-0.37584	0.37337	0.37774	0.38604
					0.92394	0.82212	0.72002	0.63125	0.5696	-0.54631	-0.50039	0.48508	-0.45572	0.43084	0.41714	0.41105	-0.40353	-0.38682	0.39488	0.37379	0.38368	0.37249	0.36771	0.37253	-0.37813	0.37597	-0.3736	-0.37785	0.38605
					0.924	0.82236	-0.72095	0.63149	-0.57025	0.54641	0.50073	0.48508	0.45575	0.43084	-0.41715	-0.41116	0.40402	-0.38721	0.39527	-0.3739	0.3847	-0.37256	-0.36857	-0.37253	-0.37877	-0.37663	-0.37438	0.37792	-0.38666
					0.9241	-0.8232	0.72116	0.63162	0.57046	0.54654	0.50158	0.48508	-0.45612	-0.43089	0.4174	0.41197	-0.40405	0.38733	-0.3956	0.37433	0.38492	-0.37277	-0.36981	-0.37279	0.37883	-0.37665	0.37441	-0.37801	-0.38682
					0.92561	0.82389	0.72163	-0.63207	0.57261	0.54657	-0.50174	-0.4855	-0.45613	0.43091	-0.41793	-0.41245	-0.40457	0.3875	-0.39563	-0.37447	-0.3856	-0.37303	0.36984	0.37327	-0.37905	-0.37745	0.37451	0.37804	-0.38683
					0.93043	0.82476	0.72312	0.63258	0.57486	-0.54661	-0.50237	-0.48565	0.4562	-0.43093	0.41795	-0.41269	0.40468	-0.3875	0.39579	-0.37476	0.38609	-0.3731	0.37018	-0.37337	0.37927	-0.37753	0.37583	-0.37839	-0.38741
					0.93262	-0.82682	0.72319	0.63347	0.57551	-0.5467	-0.50288	-0.48609	0.45713	-0.4319	0.41823	-0.41294	0.4047	-0.38764	0.39592	0.37531	-0.38615	-0.37415	0.37028	0.37354	-0.37953	0.3778	0.37693	-0.37851	-0.38802
					0.93291	-0.82718	0.72331	0.63521	0.57555	0.54713	-0.50464	0.48642	-0.45719	0.43201	-0.41828	-0.41387	-0.40477	-0.38826	-0.39642	0.37611	-0.38693	-0.37456	0.37029	0.37358	0.3799	0.37796	0.37701	-0.3786	-0.38812
					0.93429	0.82727	0.72359	-0.63541	0.57578	0.54737	0.50477	0.48673	-0.4572	0.43206	-0.41865	0.41389	-0.40526	-0.38856	-0.39671	-0.37623	0.38709	0.37514	0.37067	0.3741	-0.37996	-0.37802	0.37701	-0.37864	-0.38822
					0.93723	-0.82738	0.72421	0.63579	0.57655	0.54789	-0.5048	-0.48762	0.45751	-0.4323	0.41955	0.4139	-0.40539	-0.38882	-0.39734	0.37646	-0.38721	-0.37514	-0.37229	0.37415	0.38036	-0.37826	0.37736	-0.37882	-0.38834
					0.93756	0.82915	0.72504	0.63762	-0.57715	-0.54789	0.50546	-0.48874	-0.4576	-0.43249	-0.41956	-0.4142	0.40551	0.38903	0.39796	0.37656	0.38754	-0.37541	-0.37265	-0.37515	0.38072	0.37852	-0.37762	0.37978	-0.38851
					0.93797	0.8296	0.72557	-0.63838	0.57719	0.5479	-0.50567	-0.49072	0.458	-0.43285	0.41961	-0.41459	-0.40557	0.38917	0.39805	0.37693	0.38774	-0.3758	-0.37319	-0.37554	0.38107	-0.37857	0.37795	-0.38008	0.38854
					0.93813	0.83096	0.72562	0.63859	0.57789	0.54885	0.50598	0.49093	0.45806	0.43323	0.41991	0.41503	0.40597	0.38934	-0.39829	0.37701	0.38816	-0.37588	-0.37327	0.3761	-0.38147	0.37858	-0.37845	-0.38011	-0.38862
					0.94013	0.83115	0.72611	-0.63865	0.57844	0.54886	0.50602	0.49176	-0.45848	0.43446	-0.41995	0.4159	-0.40613	0.39073	0.39928	0.3771	0.3883	-0.37593	-0.3734	0.37618	-0.38147	0.37888	0.37855	0.38014	-0.38887
					0.94029	0.83191	0.72652	0.63879	-0.57964	0.54919	-0.50625	-0.49207	0.45865	0.43579	0.41997	0.41667	0.40646	0.39083	-0.39932	0.37726	0.38878	0.37612	-0.37341	0.37661	0.38161	-0.3789	-0.37856	0.3804	-0.38895
					0.94147	0.83195	0.72703	0.63905	0.5806	0.54923	0.50639	0.49211	0.4588	-0.43601	0.41999	-0.41699	0.40676	0.39122	-0.39952	-0.37728	-0.38914	-0.37639	-0.37408	-0.37669	-0.38175	-0.37994	-0.37869	-0.38048	0.38907
					0.94282	0.83249	0.72713	-0.63939	0.5806	0.54957	-0.50676	-0.49233	-0.45881	-0.43607	-0.42012	-0.41788	-0.40724	-0.39204	0.39956	-0.37761	-0.38967	0.37649	0.3748	0.37671	-0.38226	0.38081	0.37896	-0.38066	-0.38946
					0.94333	0.83316	0.72738	-0.6395	0.5809	-0.5497	0.50823	0.49235	-0.45905	0.43641	0.42017	-0.41794	-0.40739	0.39216	-0.39983	-0.37779	0.38993	0.37688	0.37493	0.37693	-0.38311	0.3809	-0.37911	-0.38086	-0.38956
					0.94372	0.83349	0.72783	-0.63963	0.5813	0.55034	-0.50838	-0.49277	-0.45908	0.43682	0.42022	0.41882	-0.4075	0.3924	-0.39993	-0.37801	-0.39011	0.37694	-0.37533	-0.37695	0.38324	0.38114	-0.37915	-0.38113	0.39018
					0.94437	0.83503	0.72806	-0.6407	0.58146	0.55065	-0.50879	-0.49301	-0.45922	0.43688	-0.42033	-0.41938	0.4077	0.39265	0.40047	0.37912	0.39021	-0.37724	0.37563	-0.37763	0.38328	-0.38155	-0.37942	-0.38141	-0.39042
					0.94588	0.83515	0.72813	0.64109	-0.58178	0.5509	-0.50932	-0.49336	0.45936	0.43693	-0.42061	-0.41961	0.40782	0.39334	-0.40047	-0.37923	-0.39078	-0.37754	-0.37571	-0.37797	0.38329	0.38174	-0.37954	0.38164	0.39068
					0.94669	0.8354	0.7283	0.64252	0.58221	0.55142	-0.51007	0.49386	-0.45953	0.43715	-0.42227	-0.42044	0.40859	-0.39365	0.40093	0.37943	0.39133	-0.37776	0.37633	-0.37797	-0.38348	0.38228	-0.38024	-0.3819	0.3909
					0.94704	0.83545	-0.72872	0.64435	0.58367	0.55146	0.51029	0.4942	0.45954	-0.43732	-0.42265	-0.4208	-0.40865	-0.39403	0.40094	0.37984	0.39164	0.37833	-0.37751	-0.37807	-0.38354	-0.38283	0.38032	0.38207	0.39119
					0.94777	0.83556	0.72891	-0.64539	0.58379	-0.55155	-0.51164	0.49427	0.45965	0.43803	0.42268	-0.4214	-0.40866	-0.39433	-0.40124	0.38027	0.3934	0.3785	-0.37807	0.37875	0.38417	0.38286	0.38037	0.38291	0.39153
					0.94817	0.83649	-0.72953	0.6454	-0.58401	0.55186	0.51181	0.49471	0.4597	0.43814	-0.42301	-0.42145	-0.40953	0.39538	0.40176	0.38036	0.39349	-0.37863	0.37876	-0.37888	-0.38423	-0.38287	0.38158	-0.38297	-0.39169
					0.94955	0.83987	0.73021	0.6464	0.58557	0.55197	-0.51272	0.49476	0.45974	-0.43816	-0.42317	0.42171	0.40962	0.39588	0.40178	0.38045	-0.39351	0.37931	0.37894	-0.37949	0.3848	0.38315	-0.3817	0.38323	-0.39191
					0.95229	0.84111	0.73038	-0.64717	0.58752	-0.5528	0.51297	-0.49483	0.46006	-0.43982	0.42349	-0.42173	0.40981	-0.396	-0.40183	0.38108	0.39374	0.37943	-0.37932	0.37967	-0.38519	0.3835	0.38254	0.38328	0.3924
					0.95468	0.84145	-0.73093	0.64738	-0.58818	-0.55354	-0.51303	0.49499	0.46037	0.43986	0.42358	0.42233	-0.41007	0.3961	-0.40208	0.38125	-0.39448	-0.37977	0.37941	0.37982	-0.38596	-0.384	0.38257	0.38362	-0.39246
					0.95562	0.84157	0.73158	-0.6477	0.58885	0.55422	0.51442	-0.49502	-0.4606	0.44024	0.42377	0.42253	0.4106	0.39612	-0.40235	-0.38129	-0.39463	0.37984	0.37945	0.38001	0.3863	0.38433	-0.38309	0.38372	-0.3926
					0.95658	0.84166	0.73202	0.64781	0.58902	0.55557	-0.5145	0.49509	-0.46127	-0.44031	-0.42462	0.42319	-0.41072	0.3968	0.40244	-0.38155	0.39511	0.37993	0.37993	-0.38053	0.38704	-0.38448	-0.38354	-0.38376	0.39262
					0.9572	0.84333	0.73275	-0.64793	0.58909	-0.55776	0.51464	-0.49527	0.46128	0.44112	-0.42511	-0.42402	-0.41082	0.39689	-0.40252	-0.38198	-0.39526	0.38	0.38063	0.38097	-0.38705	0.38468	0.38397	0.38378	0.39287
					0.95877	0.84335	0.73304	0.64846	0.58955	-0.55796	0.51527	0.49559	0.46132	0.44157	-0.42521	0.42426	0.41155	0.39702	-0.4029	-0.38225	0.39534	0.38047	0.38074	0.3817	0.38732	-0.3847	-0.38482	0.38382	-0.39339
					0.95941	0.84426	0.73311	-0.64861	-0.58994	-0.55845	-0.5153	0.49598	-0.46136	-0.44215	-0.42732	0.42434	0.41184	-0.39723	0.40322	-0.38294	0.39536	-0.38093	0.38086	-0.38365	-0.38743	0.38534	0.38521	0.38414	0.3941
					0.96204	0.8446	0.73644	0.64931	0.59028	-0.55865	0.51571	0.49674	-0.46142	0.44227	0.42847	0.42483	-0.4122	0.39765	0.40419	0.38322	0.3954	0.38105	0.38088	0.38378	0.38793	-0.3854	-0.38566	-0.38414	0.39411
					0.96392	0.84526	0.73653	-0.64942	0.59093	-0.55906	-0.51574	0.49716	-0.46225	-0.44266	-0.42865	-0.42536	-0.41231	0.39782	-0.4046	-0.3833	0.39543	0.38106	-0.38113	-0.38391	-0.3881	-0.38553	0.38595	-0.38433	0.39423
					0.96526	0.84546	0.73665	0.65084	0.59148	-0.55927	-0.51636	-0.49741	0.46228	-0.44299	0.42994	-0.4257	0.41268	-0.39807	0.40537	-0.38405	0.39615	-0.38162	0.38153	-0.38408	0.38861	-0.38635	-0.38637	-0.38477	0.39462
					0.96593	0.84682	0.73693	0.65189	0.59299	0.55963	0.51655	-0.49749	-0.46299	-0.44313	-0.43038	-0.42624	-0.41278	-0.39832	0.40549	-0.38462	-0.39646	-0.38199	-0.38204	-0.38411	-0.38937	0.38664	-0.38668	0.38504	0.39499
					0.96609	-0.84683	0.73726	0.65213	-0.59361	-0.55976	-0.51748	-0.49783	-0.46311	0.44346	0.4306	0.42629	-0.4128	-0.39863	0.40576	0.3847	0.39671	0.38273	-0.38227	-0.38419	0.38946	0.38687	0.38706	0.38545	0.39546
					0.96808	0.84824	0.73731	0.6526	-0.59431	0.55979	-0.51768	-0.49826	0.46319	0.44411	0.43064	0.42631	-0.41315	0.39882	0.40596	0.38473	0.39675	-0.38352	-0.38241	0.38434	0.38973	-0.38688	0.38737	-0.38563	-0.39572
					0.96996	0.84828	-0.73814	0.65295	0.59454	0.5603	0.51812	0.4989	-0.46397	0.44432	-0.43064	-0.42634	-0.4132	0.39959	0.40629	0.38479	-0.39706	0.38422	-0.38291	-0.38498	-0.38977	0.3872	-0.38794	-0.38585	-0.3959
					0.97052	0.84881	-0.73869	0.65314	0.59467	0.56039	0.51862	0.49898	0.46408	-0.44512	0.43096	0.42662	0.41323	-0.39969	-0.40629	-0.38484	0.39749	0.38445	0.38315	-0.38525	0.39013	-0.38727	-0.38822	0.38596	0.39628
					0.97101	0.84916	0.73957	0.65373	0.59528	-0.56168	-0.5193	-0.49911	0.46457	0.44629	0.4317	-0.42669	-0.41337	0.40162	0.4064	0.38502	-0.39797	0.38455	-0.38368	0.38554	0.39049	-0.3875	0.38841	-0.38698	-0.39649
					0.97121	0.84942	0.73968	-0.65399	0.59545	0.56204	-0.51984	0.49938	0.46459	0.4465	0.43215	0.42688	0.41344	0.40237	0.40689	0.38521	0.39811	0.38529	0.38392	0.38586	-0.3907	-0.38763	0.38869	-0.38708	-0.39666
					0.97208	0.85006	0.73978	0.65541	0.5955	0.56285	0.52002	-0.49954	0.46477	0.44714	0.43218	-0.42689	0.41367	0.40349	0.40718	0.38538	-0.39822	0.38558	0.38414	-0.38603	0.39111	-0.38779	0.38885	0.38728	0.3972
					0.98073	0.85086	0.7408	0.65624	0.59592	-0.56458	0.52048	0.49977	0.46529	-0.44727	0.4323	-0.42689	-0.41408	-0.4036	-0.40751	0.38606	-0.39832	0.38635	-0.38465	-0.38643	0.39123	0.38793	0.38889	0.38732	0.39726
					0.98239	0.85088	0.7417	-0.65671	0.59649	0.56507	0.52059	0.4998	-0.46531	0.44744	-0.4323	-0.42709	0.41507	-0.40413	0.40817	0.38607	-0.39877	-0.38655	0.38478	-0.38645	0.39127	0.38802	-0.3889	-0.38738	-0.39769
					0.98307	0.85149	0.74201	-0.65678	-0.59649	0.5652	0.52068	-0.49998	-0.46592	-0.4478	0.43249	-0.42725	0.41531	-0.40427	0.40823	-0.38612	-0.39893	-0.38692	0.38529	0.38646	-0.39162	0.38805	0.3891	0.38764	-0.39804
					0.98371	0.85262	-0.74322	0.65705	0.597	0.56521	-0.52099	0.50132	0.46597	0.44809	0.43291	0.42861	0.41544	0.40445	0.40825	-0.38677	0.39911	0.3872	0.386	0.38661	0.3919	-0.38805	0.38933	0.38791	0.3982
					0.98549	0.85364	0.7438	0.65785	-0.59703	0.56661	0.52133	0.50163	-0.4662	0.44843	-0.43311	-0.42962	0.41551	-0.40447	0.40846	0.38678	-0.39968	-0.38793	-0.38623	0.38698	-0.39253	0.38851	-0.38986	0.38799	-0.3985
					0.98585	0.85432	0.74452	0.65823	0.59767	0.56661	0.52159	0.50164	-0.46644	-0.44917	-0.43331	-0.42995	0.41574	0.40453	-0.40864	0.3871	0.40009	0.38828	-0.38674	-0.38731	-0.39256	-0.38854	-0.39036	0.38816	0.39884
					0.98593	0.85602	0.74499	-0.66041	0.59802	0.56701	0.52268	0.50164	0.46729	0.44954	-0.4334	0.43007	-0.41763	-0.40459	0.40925	0.38788	0.40011	-0.38844	-0.38685	0.38735	0.39271	0.38861	-0.39061	0.38855	-0.39892
					0.98701	0.85654	0.74513	-0.6607	0.59822	0.56775	0.52329	0.50165	0.46762	0.44983	-0.43348	0.43011	0.41774	0.40472	0.40947	0.38811	-0.40042	-0.38845	0.38689	0.38755	-0.39315	0.38862	0.39066	-0.38878	-0.39953
					0.9879	-0.85735	0.7453	-0.66173	-0.5991	0.5678	-0.52361	-0.5018	0.46843	0.45023	0.43374	0.43033	0.4178	-0.40502	-0.40976	-0.38882	0.40057	-0.38846	0.38784	-0.38764	0.39339	-0.38918	0.39071	0.38881	-0.40011
					0.98901	0.85798	0.74532	-0.66211	0.59947	-0.5681	-0.52379	0.50252	-0.46931	0.45056	-0.43375	0.43051	-0.41783	0.40556	-0.4099	0.38964	-0.40083	0.38853	0.38801	-0.38769	0.39376	0.38927	0.39087	-0.38916	-0.40018
					0.98975	0.85816	0.74558	0.66271	0.59979	-0.56822	0.52407	-0.5026	0.46955	-0.45058	0.43387	-0.43056	-0.41787	0.40568	-0.41002	-0.38995	0.40091	0.38941	0.38802	-0.38852	-0.39407	-0.38937	-0.39094	-0.38919	0.40019
					0.98979	-0.8582	0.74625	0.66377	0.5998	0.56858	0.5241	-0.50305	0.46957	-0.45109	-0.43388	0.43065	-0.41824	-0.40581	0.41026	-0.39003	-0.40127	-0.39073	0.38804	-0.38855	0.39408	-0.39002	-0.39102	-0.38925	0.4002
					0.99049	0.86073	0.74776	0.66387	-0.5998	-0.56887	0.52429	0.50322	-0.46962	-0.45113	0.4339	0.43073	-0.41833	-0.40615	0.41036	-0.39036	0.40131	0.39087	-0.38808	0.38878	0.39427	-0.39005	-0.39213	-0.38956	-0.40022
					0.99323	0.86119	-0.74795	0.665	0.59987	-0.56959	-0.52441	0.50359	0.4697	0.45132	0.43441	0.43079	0.41843	0.40721	-0.41074	0.39042	-0.40197	-0.39174	-0.38837	-0.38895	-0.39427	-0.3902	-0.39215	0.38961	-0.40028
						0.86209	0.74839	-0.66588	-0.60009	-0.56975	0.52566	-0.50368	-0.46972	0.45151	-0.43559	0.43082	0.41858	-0.40734	-0.41156	0.39068	-0.40198	0.39189	-0.38876	0.38897	-0.39435	0.39024	-0.39221	0.38966	0.40031
						0.86222	0.74852	-0.66633	-0.6004	-0.56978	0.52632	0.50378	0.46984	0.45185	-0.43573	-0.43084	-0.41862	0.40758	-0.4116	-0.39071	0.40229	-0.39229	0.38897	-0.38909	-0.39435	0.39068	-0.39312	0.38972	-0.40047
						0.86235	0.75019	-0.66674	0.60054	-0.56999	0.52848	0.5038	0.46997	0.45207	0.43576	0.43122	-0.41963	-0.40765	0.41209	-0.39071	0.40233	-0.39241	0.38904	0.38968	-0.39442	0.39099	-0.39338	-0.38973	0.40107
						0.86261	-0.75076	0.667	0.60073	-0.57005	0.52953	0.50414	0.47037	0.45234	-0.43597	-0.43137	-0.4198	-0.40769	0.41257	0.39118	0.40275	-0.39314	0.38928	-0.38979	-0.39449	-0.39119	0.39376	-0.38973	0.40134
						0.8628	0.75095	0.66808	-0.60123	0.57014	0.53122	0.5042	-0.47046	0.45276	-0.43616	-0.43164	-0.41985	-0.40771	0.41261	0.3914	0.40351	0.3932	-0.38932	-0.3899	-0.39467	0.39135	0.39382	0.38998	0.40287
						0.86315	0.75172	0.66816	-0.60125	0.57081	-0.53125	-0.50436	0.47121	-0.45298	-0.4364	-0.43197	-0.4204	0.40787	0.41267	0.39179	-0.4047	0.39328	0.39022	0.39012	0.39577	0.39157	-0.39403	-0.39048	-0.40288
						0.86319	0.7524	0.66874	-0.60142	0.57109	0.53161	-0.50506	0.47193	-0.45379	0.43641	-0.43266	0.42046	-0.4079	-0.41267	-0.39185	-0.40484	-0.3933	0.39065	-0.39017	0.39584	-0.39165	0.39412	-0.39057	0.40301
						0.86342	-0.75373	0.66897	-0.6027	0.57125	0.53179	0.50517	0.47255	0.45441	0.43671	0.43284	-0.42074	-0.40795	0.41337	0.39199	-0.40495	0.39364	-0.39084	0.39058	0.39608	0.39238	0.39455	-0.39169	-0.40301
						0.86407	-0.75374	0.66944	0.60311	0.5716	0.53208	0.50562	0.47285	-0.45484	-0.4368	0.43298	-0.42096	0.40815	0.41367	0.39295	-0.40543	0.39379	-0.39104	-0.39069	-0.39702	-0.3927	-0.39506	0.39215	-0.40302
						0.86666	-0.75493	-0.66966	0.60319	0.57188	-0.53221	0.50582	0.4738	-0.45506	0.43699	0.43326	0.42129	-0.4091	0.41392	0.39307	0.40604	0.39389	-0.39117	0.39098	0.39715	0.39278	-0.39522	-0.39231	-0.40336
						0.86686	0.75556	0.67028	0.60332	0.57365	0.53287	0.5059	-0.47462	0.45532	0.43742	0.43364	-0.4214	0.40939	-0.41407	0.39308	0.40622	0.39389	-0.39139	0.39129	0.39735	0.39353	0.39539	0.39346	-0.40351
						0.86715	-0.7559	-0.6703	0.60339	0.57403	-0.53299	-0.50599	0.47476	0.45594	0.43824	0.43368	0.42177	0.41042	0.41409	-0.39366	0.4067	-0.39391	0.39162	-0.39132	0.39757	-0.39376	0.39562	-0.39358	-0.4037
						0.86873	0.75609	0.67041	-0.60388	0.5743	-0.53359	0.50617	0.47508	-0.45643	-0.43838	-0.43391	0.42192	0.41067	0.41421	0.39369	-0.40692	-0.39401	-0.39173	0.39139	0.39767	-0.39389	0.39573	0.39401	0.40433
						0.86959	0.75622	0.67094	-0.60445	-0.57496	-0.53397	0.50626	-0.4753	-0.4566	-0.43854	0.43398	0.42215	0.41076	-0.41428	0.39512	-0.407	0.39436	-0.39188	0.39165	0.3977	-0.39425	-0.39674	0.39419	0.40479
						0.87102	0.75779	0.67281	0.60462	-0.57512	0.53447	0.50743	0.4762	-0.45664	-0.43869	0.43402	-0.42251	0.4111	0.41467	0.39516	0.40721	-0.39496	0.39253	-0.3925	-0.39788	0.3943	-0.39707	0.39423	-0.40502
						-0.87154	0.76005	0.6731	0.6048	0.57574	-0.53571	0.50772	-0.47623	0.45668	0.43919	-0.43415	0.42262	0.41114	0.41479	-0.39532	-0.40798	0.39499	0.39312	0.39258	0.39793	-0.3944	0.39714	-0.39449	-0.40523
						0.8736	0.7606	0.6731	0.60487	0.57715	0.53647	0.50781	0.47652	0.45676	0.43948	-0.43481	-0.42276	0.41115	-0.41497	0.39554	0.40809	0.3955	0.39316	0.39273	0.39799	0.39455	0.39726	-0.39459	0.40556
						0.87414	0.76092	0.67312	0.60525	0.57716	-0.53677	-0.50817	-0.47655	0.45745	0.43955	-0.43509	-0.4228	0.41145	-0.41598	-0.39661	0.40841	0.39553	0.3936	0.39285	-0.39801	0.39497	-0.39744	-0.39475	-0.40578
						0.87446	-0.76149	0.6732	0.60556	-0.57795	0.53686	0.50902	0.47663	-0.45765	-0.44057	-0.43518	0.42322	0.41195	0.41603	0.39669	-0.40847	-0.39594	-0.39432	0.39331	0.39804	0.39502	-0.39762	-0.3958	-0.40622
						0.87478	0.76214	0.67335	0.606	-0.57844	-0.53713	0.50944	-0.4775	-0.45765	-0.44074	0.43534	0.4235	0.41275	-0.41653	-0.39684	0.40859	-0.39638	0.39441	0.39334	0.39804	0.39503	0.39773	-0.39598	-0.40727
						0.87573	0.76226	0.67397	0.60676	-0.57854	0.53765	-0.51057	0.47899	-0.45779	-0.44144	0.43602	0.42364	-0.41283	-0.41654	0.39693	-0.40865	-0.39643	-0.39447	-0.3934	0.39805	-0.39526	0.39823	-0.39644	0.40779
						0.87674	0.76263	-0.67471	-0.60745	0.57894	0.53779	0.51136	-0.47928	0.45819	0.44152	0.43675	0.42374	0.41386	-0.41688	-0.39709	0.40935	-0.39643	-0.39451	-0.39367	0.39811	0.39527	-0.39827	0.39669	-0.40837
						0.87676	0.76334	-0.67497	-0.60768	0.57955	-0.5379	0.51181	0.47955	0.45898	-0.44232	-0.43711	-0.42437	-0.41396	-0.41717	-0.39804	-0.40937	-0.3965	-0.39469	0.39403	-0.39815	0.39567	-0.39856	-0.39712	-0.40864
						0.87765	-0.76342	-0.6752	0.60782	0.58	-0.54025	0.5125	0.47965	0.45949	-0.44236	0.43718	-0.42485	0.41402	0.41721	0.39835	0.40973	-0.39671	0.39543	0.39426	0.39858	0.39626	0.39876	0.39753	-0.40887
						0.8782	0.76423	-0.67534	0.60831	0.58004	-0.54045	0.51266	0.47976	-0.45972	-0.44247	-0.43769	0.42529	0.41456	0.41812	-0.39845	0.40983	0.39681	0.39553	0.39468	-0.39902	0.39637	-0.39878	-0.39838	0.40925
						0.87829	0.76441	0.67651	0.60907	0.58057	0.54088	-0.51269	0.47994	0.4599	-0.44251	0.43782	0.42569	0.416	-0.41835	-0.39859	-0.40994	0.39745	0.39562	0.39489	-0.39917	0.39652	-0.39941	-0.39925	-0.41007
						0.8783	0.76512	0.67667	0.60958	0.58115	-0.5414	0.51315	-0.48053	0.46	-0.44266	-0.43843	-0.42595	0.41607	-0.41839	0.39876	-0.41007	-0.39769	-0.39564	-0.39508	-0.39958	0.39677	-0.39947	0.39933	0.41012
						0.87919	0.76612	0.67731	0.60983	-0.58135	0.5424	0.51329	-0.48054	-0.46014	-0.44297	-0.43895	0.42604	0.41648	0.41853	-0.39925	0.41031	-0.39771	0.39587	-0.39509	0.39964	-0.3968	0.39974	0.39998	-0.41014
						0.8792	0.76638	-0.67744	-0.61058	0.58158	0.54251	0.51468	-0.48066	0.46015	0.443	0.43921	0.42625	-0.4165	-0.41858	0.39935	-0.41055	-0.39793	-0.39619	0.39541	-0.39964	0.39688	-0.39992	-0.40013	0.41048
						0.87982	0.7675	-0.67797	0.61068	-0.5817	-0.54264	-0.51473	-0.48081	0.46019	-0.44305	0.43999	-0.42659	0.41697	0.41863	-0.39957	0.41171	-0.39809	-0.39645	-0.39547	0.39981	-0.39698	0.39997	0.40021	-0.41052
						0.87994	0.76942	0.67816	0.61098	0.58188	0.54273	0.51476	-0.48081	0.46164	-0.44307	-0.44052	0.42706	-0.41741	-0.41975	-0.39964	0.41186	0.39934	0.39678	0.39744	-0.4	-0.3971	-0.40047	0.40031	0.41068
						0.88057	0.76975	0.68018	0.61121	0.58347	-0.54323	-0.51569	0.48087	-0.46188	-0.4441	-0.44132	-0.4272	0.41745	-0.41989	0.39974	0.4119	-0.39965	-0.39705	0.39772	0.40026	-0.39733	-0.40132	-0.4007	-0.41087
						0.88103	-0.77073	-0.68044	0.61125	0.58375	0.54333	0.51579	-0.48117	-0.46365	0.44414	0.44167	-0.42749	0.41747	-0.42007	0.40019	0.41199	0.39981	0.39835	0.39804	0.40032	-0.39764	-0.40143	-0.40087	-0.41091
						0.88312	0.77101	0.68106	0.61132	-0.58394	0.5435	0.51584	0.48158	-0.46375	-0.44425	0.44167	0.42775	-0.41772	0.42024	0.40026	0.41219	0.40026	0.3989	0.39813	-0.40038	0.39856	0.40181	0.401	0.41104
						0.88431	0.77181	0.68117	0.61173	0.58431	-0.54372	-0.51612	-0.48161	0.464	0.44488	0.44203	0.42785	-0.41809	0.42031	-0.40095	0.41228	-0.40026	-0.39933	-0.39853	-0.40059	-0.39862	-0.40195	0.40133	-0.41123
						0.8846	0.77219	0.68127	-0.61202	0.58442	0.54467	-0.51618	-0.48161	0.46401	-0.44529	0.44206	0.42797	-0.4185	0.42044	-0.40148	0.41244	0.40038	0.39949	0.39863	0.40063	-0.39867	-0.40327	-0.40147	0.41132
						0.88503	0.77233	-0.68191	0.613	0.58464	-0.54507	0.51656	-0.482	0.46447	0.44537	0.44269	-0.42868	0.41862	0.42047	0.40191	-0.41256	-0.40041	0.39951	0.39889	0.40063	0.3988	0.40348	0.40193	0.41135
						0.88533	-0.77301	-0.68329	0.61308	0.58494	0.54538	0.51719	0.48203	0.46452	0.44616	-0.44295	-0.42939	-0.41922	-0.4219	0.4024	-0.41282	0.40044	-0.39971	0.39901	-0.40063	-0.39926	-0.40435	-0.40201	-0.41169
						0.8876	0.77438	0.68361	-0.61312	0.58639	-0.54548	0.51802	0.48214	-0.4646	-0.44625	-0.4431	0.43004	-0.41999	-0.42305	0.40244	-0.41289	0.40109	-0.39985	-0.39948	0.40086	-0.39927	0.40454	0.40238	0.41217
						0.88835	0.77444	0.68378	0.61412	0.58723	0.54646	0.51825	0.48222	-0.46461	-0.44649	-0.44313	0.43043	0.4202	-0.42342	-0.40256	-0.41319	0.40127	0.39988	0.39966	0.40156	-0.39941	0.40471	0.40304	0.41235
						0.88957	0.77447	0.68433	0.61415	-0.58735	0.54678	-0.51833	0.48236	-0.46542	-0.4466	-0.44405	0.43049	0.42071	-0.42351	-0.40363	-0.41473	0.4015	0.40003	0.40003	0.40157	-0.39956	0.40479	-0.4033	0.41246
						-0.88984	0.77578	0.68549	0.61437	0.58746	-0.5468	-0.51854	0.48256	0.4657	0.44667	-0.44474	-0.43081	-0.42077	-0.42356	-0.40397	0.41502	-0.40159	-0.4002	-0.40046	0.40199	-0.39969	-0.40482	-0.40333	0.41267
						0.89056	-0.77653	0.6861	0.6144	0.58771	-0.54782	0.51863	0.4829	-0.46601	0.44682	0.44479	0.43115	0.42086	0.424	-0.40412	0.41518	-0.40192	-0.40022	0.40054	-0.40213	0.39989	0.40516	0.40351	-0.41281
						0.89178	0.77701	-0.68612	-0.61478	0.58783	0.54896	0.51896	0.48369	-0.46634	0.4473	0.44487	-0.43126	-0.42136	0.42407	0.40451	-0.41544	-0.40253	-0.40024	-0.40078	0.40214	-0.40024	0.40714	-0.40351	0.41387
						0.89209	0.77722	-0.68672	-0.61502	-0.58795	0.54896	0.51945	-0.48394	0.46649	-0.44749	-0.44489	-0.43145	-0.42175	-0.42475	-0.40455	0.41547	0.40343	-0.40054	-0.40163	0.40247	0.40069	0.40796	0.40395	0.41429
						0.89266	0.77772	0.68712	0.61511	0.58836	-0.54896	0.51954	0.48459	0.46649	0.44797	0.44542	-0.43147	-0.42183	0.42488	0.40462	-0.41563	0.40373	-0.40101	-0.40165	0.40273	-0.4009	0.40824	0.40407	-0.41451
						0.89287	-0.77806	0.68747	0.61535	-0.58904	0.54968	0.51988	0.48519	0.46659	0.44824	0.44547	0.43162	-0.42212	0.42489	0.40497	-0.41627	-0.40387	0.40108	0.40166	-0.40289	0.40096	-0.40856	0.40423	0.4155
						0.89403	0.77814	0.68773	-0.61558	-0.59019	0.55018	-0.52045	0.48551	0.46751	-0.44832	0.44586	0.4317	0.4223	0.42497	0.40517	-0.4171	0.40421	0.40124	-0.40168	0.4029	0.40126	-0.4087	0.40429	-0.4155
						0.89459	0.7798	0.68913	0.61561	-0.59063	0.55051	0.52087	-0.48553	-0.46796	-0.4486	-0.44594	-0.43186	-0.42236	-0.42499	-0.40547	0.4176	-0.40429	-0.40125	0.40219	0.40313	-0.40175	0.40873	-0.40458	-0.4157
						0.89528	0.77998	0.68943	0.61564	0.59131	-0.551	0.521	-0.48609	0.46939	0.44874	-0.44596	0.43379	0.4224	-0.42508	0.40549	0.41773	0.40433	0.40146	0.40234	-0.40318	-0.40182	0.40873	-0.40458	-0.41574
						0.89556	0.78042	0.69004	-0.61592	0.59183	0.55111	0.52104	-0.48616	-0.46955	-0.44874	-0.44603	0.43379	0.42282	-0.42512	0.40591	-0.4178	-0.40452	0.40154	0.40247	0.40322	0.40234	0.40881	0.40475	0.41616
						0.89648	0.78065	0.69096	-0.61678	0.59189	0.55136	0.5213	-0.4862	0.46963	-0.44899	0.44605	0.43454	-0.423	0.42606	0.40615	-0.41818	-0.40461	-0.40213	-0.40258	0.40326	-0.40249	-0.40919	-0.40475	-0.41618
						-0.89793	-0.78077	0.69129	0.6174	-0.59203	0.55148	-0.5214	0.48643	0.47012	0.44918	0.44651	-0.43466	-0.42343	0.4262	-0.40636	0.41854	-0.40518	-0.40222	0.40317	0.40346	0.4025	0.40923	0.40536	-0.41656
						0.89802	-0.78125	-0.69132	-0.61798	-0.59332	0.55155	-0.52174	-0.48657	0.47019	0.4492	0.44662	0.4348	0.42426	-0.42641	0.40721	0.41857	0.4054	0.40225	-0.40356	0.40351	-0.40289	-0.40962	-0.40545	0.41673
						0.89806	0.78151	0.69175	0.61805	0.59344	-0.55228	0.52226	-0.48699	0.47047	-0.44955	-0.44669	0.43512	-0.4245	0.42642	0.40748	-0.41866	-0.40555	-0.40228	-0.40448	-0.40351	0.40294	-0.40983	0.40552	0.41679
						0.90253	0.78179	0.69254	0.62048	-0.59354	0.55231	0.52252	0.48706	0.47057	0.4498	0.44704	0.43519	-0.42451	-0.42723	-0.40799	-0.41893	0.40561	0.4025	-0.40504	-0.40353	0.40313	-0.41006	0.40574	0.4168
						0.90303	0.78194	0.69297	-0.62081	0.5939	0.55273	0.52291	-0.48776	0.47069	-0.44997	-0.4472	0.43549	-0.42502	0.42738	0.40804	0.41896	-0.40599	-0.40321	-0.40533	-0.40362	-0.40348	-0.41062	0.4061	-0.41707
						-0.90328	0.78222	0.69306	0.62124	0.59424	0.55284	0.52297	-0.48778	-0.47118	-0.45032	0.44748	0.43572	-0.42623	0.4274	-0.40806	-0.41916	0.4063	0.40337	-0.40576	0.40429	0.4035	-0.41072	-0.40638	0.41792
						0.90363	0.78238	0.69374	0.62152	0.59444	-0.55297	-0.52316	-0.4879	-0.47121	0.45034	0.44752	-0.43624	0.4263	-0.42747	0.40809	0.41938	0.40699	-0.40359	0.4059	0.40486	-0.40377	-0.41124	0.40642	0.4193
						-0.90398	-0.78246	0.69376	0.62157	0.59465	0.55342	-0.52319	-0.48861	0.47129	0.45034	0.44798	0.43631	-0.42637	-0.42747	-0.40818	-0.41948	0.407	0.40421	0.40608	-0.40543	-0.4038	-0.41153	-0.40677	0.41948
						0.90444	0.78279	0.6938	0.62238	0.59517	0.55472	0.52403	-0.48908	-0.47129	-0.45044	-0.44817	-0.43634	0.42658	-0.4275	-0.40864	-0.41981	0.40717	0.40428	-0.40632	-0.40556	0.40382	0.41203	0.40717	-0.41949
						0.90849	0.78281	-0.69404	0.62353	-0.59526	-0.55486	0.52435	-0.48945	0.47215	0.45066	-0.44845	0.43636	0.42708	0.42757	0.40865	-0.4202	-0.40736	-0.40468	0.40665	0.406	-0.40384	-0.41206	0.40747	-0.42007
						0.9086	-0.78298	0.69459	-0.62358	-0.5953	0.55523	0.52493	-0.48948	-0.47215	-0.45104	0.44865	0.4364	0.42759	0.42893	0.40879	0.42025	0.40739	0.40515	-0.40671	0.40642	-0.40388	0.41208	-0.40755	-0.42026
						0.91464	0.78378	-0.6946	-0.62396	-0.59608	0.55633	0.52519	-0.48996	-0.47301	0.45175	-0.44865	-0.43696	-0.42764	0.42908	-0.40879	0.42037	-0.40748	0.40544	0.407	-0.40657	-0.40411	-0.41215	-0.40803	-0.42051
						0.9177	0.784	0.69482	0.62435	-0.5965	0.55749	0.52531	-0.49004	-0.47309	0.45203	0.44899	-0.43699	0.42777	0.42921	0.4088	-0.42057	-0.40758	0.4055	-0.40733	0.40721	0.40422	-0.41257	-0.40807	-0.42068
						0.91785	-0.78444	-0.69486	-0.6254	0.59651	-0.5582	-0.52594	0.49073	0.47401	-0.45239	0.44904	-0.43704	0.42781	-0.42931	-0.40881	0.42071	-0.40815	-0.40596	0.40738	0.40723	0.40431	0.41277	-0.40862	0.42083
						0.91844	0.7845	0.6952	0.62569	0.59692	0.55823	0.52605	-0.49088	0.47412	0.45272	-0.44926	-0.43755	0.42785	0.4297	-0.40915	-0.42095	0.40843	0.40612	0.40771	-0.40726	0.40468	0.41298	0.40885	-0.4209
						0.91937	0.7847	0.69526	0.62601	-0.59719	-0.55847	-0.52627	-0.49093	0.47552	-0.45291	0.4494	-0.43781	0.42816	-0.43065	0.40934	-0.42101	0.40844	0.40673	-0.40874	0.40761	0.40508	-0.41472	0.40917	0.42108
						0.91979	0.78528	0.6955	0.62635	0.59746	0.55897	0.52632	-0.49117	0.4767	0.45295	0.44964	0.43791	-0.42839	0.43072	0.41016	0.42122	-0.40896	-0.40747	-0.40935	0.40782	0.40588	-0.41488	-0.40926	0.42149
						0.92105	0.786	-0.6955	0.62719	-0.59751	0.5592	-0.52694	-0.49123	-0.47685	0.453	-0.44991	-0.43794	0.42851	0.43095	0.41041	0.42135	-0.4092	0.40779	0.40975	0.40868	-0.40615	-0.41488	0.4098	-0.42163
						0.92196	0.78629	0.69556	0.62766	0.59864	-0.56002	0.5271	-0.49131	-0.47703	-0.45562	-0.45037	-0.4381	0.42867	-0.43103	0.41056	0.42135	-0.40962	0.40784	0.41015	0.40911	0.40635	-0.41492	0.40981	0.42186
						0.92255	0.78648	0.69582	0.62834	0.59873	0.56031	0.52725	0.49164	-0.47809	0.45579	-0.45058	0.43814	-0.42879	-0.43109	0.41132	0.42192	-0.40978	0.40808	0.4102	-0.40977	-0.407	-0.41493	-0.4101	-0.42223
						0.92257	0.78659	-0.69682	-0.62836	0.59958	0.56094	-0.52751	0.4917	0.47816	-0.45648	-0.45071	0.43886	0.42884	-0.43112	-0.41208	0.42198	-0.41011	0.40813	-0.41107	0.41002	0.4073	0.41528	-0.41054	0.4225
						0.92263	-0.78665	0.69687	0.62845	0.6	0.56123	0.52759	-0.49178	0.4783	0.45674	-0.45108	0.43887	0.42893	0.43127	-0.41226	-0.42232	0.41016	-0.40846	-0.41115	0.41019	0.40827	-0.41546	0.41067	-0.42301
						0.92547	0.78676	0.69714	-0.6285	0.60052	0.56252	-0.5277	0.4923	0.48099	-0.45714	0.45147	-0.43935	-0.42949	0.43187	0.41256	-0.42232	0.4103	-0.40862	-0.41136	0.41021	-0.40908	0.41567	0.41187	0.42312
						0.92949	0.78726	-0.69717	0.62855	0.6021	0.56266	-0.5277	0.49262	0.48105	0.45806	0.45203	0.43937	0.42951	-0.43254	-0.41304	0.42262	0.41043	-0.40883	-0.41144	-0.41022	0.40922	0.41568	0.41243	-0.42337
						0.93028	0.78729	-0.69771	0.62964	0.60299	-0.56347	-0.52804	0.49285	0.48131	-0.45828	0.45229	-0.43957	-0.43092	-0.43278	-0.41375	-0.42279	0.41093	-0.4089	0.41163	0.41034	-0.40956	0.41587	-0.41261	0.4235
						-0.93125	0.78791	-0.69786	0.63043	-0.60307	-0.56357	-0.52808	-0.4932	0.48142	0.45838	0.45244	-0.43973	0.43098	-0.43285	-0.41435	0.42387	-0.41113	0.4092	0.41169	-0.41049	-0.40992	-0.41595	0.413	0.42367
						0.93148	-0.78872	0.69842	0.6306	-0.60313	0.56365	-0.52961	0.49455	-0.48183	0.45901	-0.45314	-0.43983	0.43152	-0.43287	-0.4145	0.42488	0.41119	0.40921	-0.41218	-0.41102	0.41025	0.41638	-0.413	-0.42413
						0.93234	0.78873	0.69843	0.63136	0.60348	-0.56384	-0.52982	-0.49478	-0.48217	0.45905	-0.45366	-0.44069	-0.43186	0.43311	0.41469	-0.42529	0.41135	-0.40936	0.41299	0.41201	0.41064	0.41644	0.41329	0.42471
						0.93396	0.78909	0.69911	-0.63137	0.60411	0.56385	-0.53042	0.49496	0.4836	-0.45913	-0.45386	0.44112	0.43225	0.43374	-0.41503	-0.42636	0.41226	0.40952	-0.41301	0.41234	-0.41119	0.41683	0.41389	0.42472
						0.93463	0.78945	0.70056	0.63169	0.60519	-0.56475	-0.53123	0.49584	-0.48419	0.45938	0.45412	-0.44131	0.4331	-0.43413	-0.41558	-0.42656	-0.41267	-0.40958	0.41312	0.41247	-0.41134	-0.41685	0.41419	-0.42486
						0.93468	0.78957	0.70075	0.63184	0.60626	0.56842	0.53139	-0.49758	0.48512	-0.46001	-0.45429	-0.44131	0.43353	-0.43444	-0.41565	-0.42666	0.41271	-0.41018	-0.41324	0.41285	0.41165	-0.41735	0.41437	0.42502
						0.93654	-0.78986	0.70082	0.63236	0.60642	0.56988	0.53154	0.49766	0.48542	0.4606	-0.45457	-0.44134	0.43383	0.43477	0.41613	-0.42671	-0.41404	-0.41048	0.41349	0.41294	-0.41173	0.41738	-0.41439	0.42517
						0.93654	0.79153	0.70107	-0.63261	0.60713	-0.57012	0.53158	-0.49768	0.48548	0.46094	0.45463	0.4416	-0.43427	0.43591	0.41624	-0.42688	-0.41529	-0.41057	-0.41386	0.41294	0.41211	0.41751	0.41442	0.42531
						0.938	-0.79236	0.70114	-0.63278	-0.60728	-0.57041	-0.53233	0.49772	0.48585	-0.461	0.45463	0.44165	0.43435	-0.43601	-0.41624	-0.42691	-0.41606	0.4109	0.41403	0.41374	0.41216	0.41754	-0.41498	0.42563
						0.94029	0.79416	0.70259	0.63506	-0.6073	-0.57054	0.5324	0.49839	0.48592	0.46121	-0.45472	0.44175	-0.4348	-0.43622	-0.41628	0.42714	0.41616	-0.41162	0.41425	0.4138	0.41226	0.418	0.41533	0.42566
						0.9439	0.79491	-0.70384	0.63594	0.60793	0.57058	0.53254	-0.49849	0.48593	-0.4615	0.45506	0.44213	0.43492	-0.43684	0.41632	0.4276	-0.41633	0.4117	0.41436	0.41389	-0.41233	0.41808	-0.41536	-0.42585
						0.94493	-0.79543	0.70393	0.63704	-0.60811	0.57071	-0.53272	0.49858	-0.48599	0.46152	0.45536	0.44269	0.43558	-0.43692	0.41691	0.428	0.41642	0.41174	-0.41444	0.41397	0.41274	-0.41811	-0.41563	-0.42611
						0.94548	0.79566	0.70538	0.63741	0.60863	-0.57181	-0.53274	-0.49912	0.48609	0.46178	-0.45552	0.44288	0.43577	0.43713	0.41749	-0.4285	-0.41694	0.41214	0.41495	0.41416	-0.41306	0.41815	-0.41564	-0.42646
						0.94616	0.79579	0.70604	-0.63768	-0.60884	0.57186	0.53392	-0.49929	-0.48761	0.46206	0.45617	0.44324	-0.43629	-0.43786	0.4176	0.42882	0.41703	0.41219	-0.41534	0.41459	0.41322	0.41846	-0.41583	-0.42684
						0.9489	-0.79703	0.70607	0.63798	0.60885	0.5719	0.53443	0.49971	0.48818	-0.46299	0.45727	-0.4435	-0.43692	0.43788	-0.41813	-0.42908	0.41709	-0.41235	0.41535	0.41503	-0.41338	-0.41871	0.41598	0.42692
						0.9494	0.79739	0.70619	-0.63904	0.60896	-0.57196	0.53481	-0.50086	0.48855	0.46363	0.45737	-0.44367	-0.43692	0.43802	-0.41859	0.42926	0.41711	-0.41239	0.41536	-0.41522	0.41339	-0.41887	0.41716	0.42701
						0.94953	0.79945	0.70678	-0.63969	-0.60921	-0.57202	0.53506	-0.50096	0.48874	-0.46364	0.45834	-0.44442	0.4371	-0.43815	-0.41865	0.42954	-0.41711	-0.41258	0.41538	0.41541	-0.4136	-0.41899	-0.41742	0.42881
						0.9512	0.79986	-0.70742	0.64052	0.60971	0.57261	-0.53513	0.50118	0.48947	-0.46394	0.45839	0.44449	-0.43774	-0.43823	-0.4193	0.42957	0.41724	0.41262	-0.41557	-0.41558	-0.41362	-0.41975	-0.41805	-0.42931
						0.9527	0.80088	0.70776	0.64079	-0.61005	-0.57277	-0.53527	0.50158	0.4897	0.464	-0.45854	0.44449	0.43871	0.43836	-0.41945	-0.42957	0.41777	0.41272	-0.41633	-0.41564	-0.41374	0.42057	-0.41835	-0.42938
						0.95502	0.80182	0.70831	0.64083	0.61043	-0.57301	-0.53555	0.50246	0.48996	0.46476	-0.45869	0.4446	0.43899	0.43868	-0.41945	-0.42963	0.41852	-0.41327	0.41656	0.41652	0.41456	-0.42058	-0.41867	0.42974
						0.95665	0.80221	0.70894	-0.64128	-0.61143	-0.57388	0.5362	0.50272	0.48998	-0.46488	-0.45878	0.44488	-0.43926	0.43908	0.41972	-0.43017	0.41951	0.41414	-0.41663	-0.41653	0.41472	0.4209	-0.4189	-0.42992
						0.95815	-0.80233	-0.70894	0.64135	0.61159	0.57425	0.53623	0.50301	-0.49029	-0.46499	0.45917	0.4449	0.44017	0.43959	-0.42007	0.43018	0.42004	-0.41447	0.41664	0.41702	0.41487	0.42102	0.41899	-0.43049
						0.96043	0.80237	-0.70915	0.64166	0.61161	-0.57471	0.53667	0.50382	-0.49116	0.46514	0.45945	0.44493	-0.44026	0.43971	0.42061	-0.43031	-0.42008	0.41474	0.41712	0.41713	0.4151	-0.42121	0.41934	0.4306
						0.96199	0.80487	-0.70928	0.64167	0.61165	0.57487	0.537	0.50471	0.49208	0.46535	0.45968	0.44505	-0.44033	-0.43975	-0.42075	-0.43062	0.42023	0.41491	0.41759	-0.41716	-0.41592	-0.42192	-0.41937	-0.43062
						0.96325	0.80597	-0.70932	0.64193	0.61203	-0.57506	-0.53739	-0.50477	0.4922	-0.466	-0.45988	0.44525	0.44035	0.4398	0.42085	0.43105	0.42038	0.41532	0.41786	0.4173	-0.41634	0.42212	-0.41945	-0.43076
						0.96346	0.80682	0.70984	-0.64222	-0.61257	0.57714	0.53741	0.50501	0.49235	0.46684	-0.46013	-0.44547	0.44038	0.44088	-0.42119	-0.43118	-0.42049	-0.41537	-0.41795	-0.41764	0.41661	-0.42218	0.41953	-0.43105
						0.97058	0.80756	0.71136	-0.64227	0.61263	0.5784	0.53762	0.50585	0.49245	-0.46695	0.46033	-0.44654	0.44062	-0.44138	-0.42148	-0.43143	0.42072	-0.4155	0.41797	0.41833	-0.41702	0.42278	0.4196	0.43127
						0.97131	0.80906	0.71173	0.64244	-0.61307	-0.57847	0.53784	-0.50612	0.49254	-0.46735	-0.46056	0.44679	-0.44128	0.44178	-0.4215	-0.43155	0.42084	0.41557	0.41855	-0.4192	-0.41705	0.42289	0.41974	-0.43134
						0.97146	0.8098	0.71236	0.64261	0.61335	0.57866	-0.53935	-0.50626	0.49322	0.46838	-0.46084	-0.4473	0.44134	0.44183	0.4216	0.43213	-0.42129	0.4157	-0.4187	-0.41978	-0.41726	-0.42303	-0.41975	0.4317
						0.97166	-0.81019	0.71275	0.64381	0.61338	-0.57868	-0.53947	-0.50626	0.49331	0.46857	-0.46114	-0.44745	0.44152	-0.44188	0.42209	-0.43213	-0.42148	-0.41597	-0.41916	-0.41995	0.41732	0.4234	0.41977	0.43184
						0.97199	-0.81101	0.713	-0.64412	-0.61413	0.5787	0.53972	-0.5071	-0.49386	-0.46864	0.46124	-0.44761	0.44163	0.44236	0.42263	0.43232	-0.42192	0.41616	0.4192	0.42042	0.41779	0.42343	0.41987	-0.43185
						0.97439	0.81164	-0.71319	0.64528	0.61422	0.57876	-0.54145	0.50787	-0.49451	-0.47094	0.46198	0.44762	-0.44194	-0.44251	-0.42291	-0.43275	0.4225	-0.41634	0.41995	-0.42076	-0.41794	-0.42362	0.42002	-0.43212
						0.97708	0.81182	-0.71434	0.64561	0.61424	-0.57922	0.54152	-0.50847	-0.49471	-0.47101	-0.46239	-0.44827	0.44222	-0.44273	0.42294	-0.43309	0.42282	-0.4168	0.42009	-0.42165	-0.41821	-0.42476	-0.42022	0.43287
						0.99008	-0.81195	-0.71474	0.64573	0.61433	-0.57937	0.54153	-0.50857	0.49491	-0.47107	-0.46293	-0.44838	0.44287	-0.44346	0.42323	-0.43378	-0.4242	-0.41707	-0.42039	-0.42219	0.41842	0.42478	0.42057	0.43328
						0.99069	-0.8122	0.71592	0.64622	-0.61468	-0.5797	0.54167	0.51074	0.49551	0.47201	-0.46321	0.44885	0.443	0.44376	-0.42333	0.43384	-0.42465	-0.4173	0.42067	-0.42221	0.41846	-0.4254	0.42188	0.43354
						0.99311	0.81292	0.71595	0.64655	0.6151	0.57975	0.54173	-0.51165	0.4961	-0.47237	0.46337	0.44898	-0.4431	0.44483	0.42346	0.43423	0.42537	-0.41791	-0.42082	0.42226	-0.41855	0.42561	-0.42219	0.43368
						0.99329	0.81295	0.71596	0.64712	-0.61522	-0.58019	0.54179	-0.5121	0.49746	-0.47249	-0.46409	0.44931	-0.44351	-0.44488	-0.42355	-0.43466	0.42541	-0.41829	0.42153	-0.4224	-0.41861	0.42571	0.42223	0.43388
						0.99428	0.81428	0.71628	0.64716	-0.61582	0.58035	-0.54302	0.51259	0.49751	0.47306	0.46524	0.44954	0.44469	0.44494	0.42365	0.43467	0.42623	0.41844	-0.42153	-0.42292	0.41865	-0.42589	-0.42253	0.43515
							0.81451	0.71648	0.6475	0.61637	0.58052	0.54347	0.51278	0.49756	-0.47328	0.46676	-0.44986	0.44482	-0.44496	0.42367	-0.43472	-0.42694	-0.41863	0.42176	-0.42295	0.41884	-0.42641	0.42259	-0.43584
							0.81584	0.71672	-0.64798	0.61676	-0.58232	0.54363	-0.51339	-0.49761	0.47355	0.46715	0.45005	0.44494	-0.4453	0.42424	0.43474	0.4271	0.41962	-0.42182	0.42305	0.41889	0.42658	0.42276	0.43624
							0.81619	-0.7176	0.64829	0.61725	0.5825	0.5438	-0.5134	0.49819	-0.47397	-0.46746	-0.45018	-0.44494	0.44534	-0.42486	-0.43493	0.4276	0.41985	-0.42188	0.42347	-0.419	0.42664	-0.42287	0.43625
							0.81628	0.71824	0.64834	-0.61749	0.58268	0.54414	0.51366	0.49837	-0.47428	-0.46764	0.45021	-0.44496	0.44539	-0.42492	0.43496	0.42782	-0.41999	0.42197	-0.4237	-0.41946	-0.42813	0.4242	-0.43648
							0.81631	-0.7193	0.64866	0.61771	-0.58337	0.54451	0.51374	0.49938	0.4743	0.46821	0.45123	0.44517	-0.44549	-0.42525	-0.43505	0.42894	-0.42011	-0.42236	0.4239	0.41965	-0.42823	0.4244	0.43651
							-0.81645	-0.7197	0.64898	0.6181	0.58341	0.54476	0.51377	-0.4998	-0.47451	0.46833	0.45139	0.44522	0.4457	0.42538	-0.43507	0.42942	0.4203	-0.42272	-0.42457	-0.41966	0.42853	-0.42449	0.43651
							-0.81646	-0.72013	0.64925	-0.61831	-0.58341	-0.54477	-0.51445	0.49986	0.47456	0.46859	-0.45159	0.44528	0.44634	0.42548	0.43593	0.42948	0.42037	0.42273	0.42469	0.42002	0.42885	-0.42464	-0.43746
							0.81933	0.72045	0.64934	0.6185	0.58358	0.54481	-0.51447	0.50044	-0.47464	0.46903	0.45258	0.44533	0.44664	0.42552	0.43676	0.42978	0.42066	0.42301	0.42489	-0.42002	-0.42904	0.42475	-0.43751
							0.81997	-0.72068	0.64946	0.61911	-0.58414	-0.54483	0.5146	0.50045	0.4764	-0.46934	0.45274	0.44535	0.44667	-0.42566	0.43701	0.4304	0.421	0.42308	-0.42509	0.42017	-0.42953	0.42496	0.43768
							0.82119	0.72077	0.64956	0.61935	0.58476	-0.54483	0.51616	0.50065	0.47676	0.46942	0.45275	0.44543	0.44713	0.42583	0.4375	0.43072	0.42112	-0.42326	-0.42533	0.42035	0.42972	0.42581	0.43777
							0.82266	0.72118	0.64986	-0.61968	0.58503	-0.54492	-0.51616	-0.50093	-0.47678	-0.47031	0.45295	-0.44572	-0.44727	0.42598	-0.43778	0.43147	-0.42113	-0.42342	0.42614	-0.42098	0.42994	0.42585	-0.43795
							0.8228	0.72127	0.6503	0.61999	0.58552	0.54493	-0.51635	0.50097	0.47704	0.47097	0.45295	0.44599	0.44769	0.4264	0.43831	-0.43191	-0.42124	0.42366	0.42643	0.421	0.42999	0.42597	0.43833
							0.82294	0.72151	0.65106	0.62015	-0.58638	0.54497	-0.51648	0.50188	0.47732	-0.47198	0.45341	0.44638	0.44824	-0.42655	-0.43838	0.43202	0.42132	0.42399	-0.42651	-0.42121	0.43037	0.42609	-0.43889
							0.82302	-0.72225	0.65149	0.62062	0.58676	0.54535	0.51682	-0.50193	-0.47746	0.47225	0.45363	-0.44682	0.44833	-0.4268	0.43959	0.43217	-0.42178	0.42405	-0.42694	0.42159	0.43041	-0.42675	-0.43974
							0.82482	0.72245	0.652	-0.62062	0.5871	-0.5454	-0.51706	-0.50261	-0.47748	-0.47274	-0.45416	0.44712	0.44838	0.42732	-0.43975	-0.43239	-0.42186	0.42407	0.42703	0.42208	0.43066	-0.42746	0.43977
							0.82529	0.72354	-0.65203	0.62082	-0.58749	-0.54572	0.51767	0.503	0.47799	-0.47431	-0.45501	-0.44761	0.44838	-0.42739	0.43988	-0.4326	0.42192	0.42477	0.42716	0.42218	-0.43136	-0.42803	0.43986
							0.82775	-0.72386	0.65225	-0.62094	0.58796	0.54575	0.51846	0.50321	0.47799	0.47502	0.45511	-0.44773	0.44876	-0.42773	-0.44011	-0.43269	-0.42226	-0.42519	0.42814	0.4226	0.43154	-0.42817	-0.43999
							0.82823	0.72428	-0.65266	-0.62108	-0.58819	-0.5458	-0.51883	0.50376	-0.47823	0.47513	-0.45515	0.44834	0.44912	0.42776	-0.44051	0.43294	-0.4223	-0.42531	0.42838	0.4226	0.43186	0.42825	-0.44025
							0.82825	0.72434	0.65275	0.62129	-0.58837	0.54582	0.51904	-0.50559	0.47878	0.47535	-0.4561	0.44875	-0.44918	-0.42781	-0.44091	-0.43386	-0.42262	0.4254	0.42875	-0.42262	0.4321	0.429	0.44044
							0.82917	-0.72434	0.65281	-0.62153	0.58885	-0.5464	0.51924	-0.50622	-0.47906	-0.47536	-0.45611	0.44897	0.44942	-0.42788	0.44135	0.43485	-0.42266	-0.42551	-0.42906	-0.42268	-0.43232	0.42905	-0.4417
							-0.83004	0.72436	-0.65314	-0.62173	-0.58917	-0.54669	-0.51993	-0.50642	-0.47932	-0.47567	0.45622	0.44959	0.44958	0.42827	0.44157	0.43495	0.42316	0.42591	0.42958	-0.42289	0.43267	0.42966	0.44184
							0.8302	0.72445	0.65509	0.62284	0.58922	0.54705	0.51997	0.50648	-0.47982	0.47616	0.45678	-0.45	-0.4496	0.42839	-0.44161	0.43597	-0.42324	0.42622	0.43012	0.42335	0.43283	-0.42968	-0.44193
							0.83121	0.72469	0.65543	-0.62362	0.58937	0.54723	-0.52006	-0.50649	0.48004	0.47654	0.45685	0.45027	0.45026	0.4286	-0.44192	-0.43599	-0.42342	0.42632	-0.4306	-0.42365	-0.43283	0.42969	-0.44231
							0.83205	0.72471	0.65577	0.62504	0.58972	0.54798	0.5204	-0.50681	0.48052	0.47675	0.45749	-0.45031	-0.45031	-0.42866	0.44223	-0.43603	-0.42425	0.42703	-0.43061	0.42385	-0.43423	0.42972	0.44239
							0.83254	0.72473	0.65597	-0.62524	-0.5898	0.54808	-0.52175	-0.50695	0.48149	-0.47679	0.45751	0.45052	0.45056	0.42921	-0.44315	-0.43616	0.42452	-0.42712	0.43084	0.42421	-0.43431	0.42973	-0.44291
							0.83347	0.72533	-0.65607	-0.6254	0.59002	0.54839	-0.52192	0.50704	0.48228	0.4771	0.45753	0.45061	-0.45141	0.42944	0.44338	0.43655	-0.42544	0.42715	0.43138	0.42544	-0.43437	0.43007	0.44305
							0.83352	0.72626	0.65675	0.62543	-0.59015	0.54876	0.52197	0.50753	0.48265	-0.47844	0.45754	0.451	0.45144	0.42955	-0.44349	0.43697	-0.4255	0.42755	-0.43141	0.42554	0.43451	-0.43036	0.44324
							0.83352	-0.72663	-0.65789	-0.62555	0.59064	0.54928	0.52213	-0.50838	0.48286	0.4785	0.45772	-0.45126	0.45171	-0.4297	0.44364	-0.43706	-0.42551	0.42755	0.43159	0.42558	0.43457	-0.4306	0.44357
							-0.83412	0.72807	-0.65809	-0.62589	0.59115	-0.54994	0.52229	0.50849	-0.48287	-0.4786	0.45788	0.45136	-0.45229	0.42992	0.44376	-0.43826	-0.42559	-0.42777	-0.43221	0.42602	0.43508	-0.43073	-0.4436
							0.83437	0.72976	0.66055	0.62592	-0.59225	0.55024	0.52268	-0.50877	-0.48304	0.47911	0.45791	-0.45145	0.45234	0.431	0.44383	-0.43832	-0.42588	-0.42817	0.43222	-0.42641	-0.43585	0.43138	0.44369
							0.83441	0.73048	0.66077	-0.62604	0.59282	0.55089	0.52298	0.50878	-0.48382	-0.47926	0.45797	-0.45212	-0.45235	0.43146	0.44388	-0.43864	-0.42602	0.42834	0.4324	-0.42641	-0.43602	-0.4314	-0.4438
							0.83492	0.73054	0.66197	0.62805	-0.59309	-0.55101	0.52307	0.50887	-0.48506	0.47945	0.45797	-0.45233	-0.4528	-0.43152	-0.44406	0.43877	-0.42614	-0.42871	-0.4324	-0.42646	0.43681	0.43178	0.44407
							0.83573	0.73158	-0.6625	-0.62862	0.59329	0.55112	0.52329	0.50887	0.48648	0.48012	0.45815	0.45246	0.45288	0.43177	0.44409	0.43915	-0.42639	-0.42883	-0.43275	0.42649	0.43683	0.43182	-0.44409
							0.83575	0.73197	-0.66296	0.62863	0.59336	0.55255	-0.52346	0.50949	0.48657	0.48015	-0.45844	0.4529	0.45302	-0.43216	0.44536	0.43922	0.42644	-0.42979	-0.43285	-0.42673	-0.43691	-0.43215	-0.44447
							0.83607	-0.7325	-0.66398	0.62871	0.59412	-0.55267	-0.52358	0.50975	0.48694	-0.48027	-0.45926	0.45297	0.45303	-0.43224	0.44581	-0.43957	-0.42761	-0.42995	0.43364	0.42674	-0.43775	-0.4327	0.44452
							0.83646	0.73322	0.66402	-0.62879	0.59418	-0.5528	0.52455	-0.51002	-0.48706	0.48042	-0.45933	0.45352	-0.45307	0.43341	-0.4466	0.4396	0.42765	-0.42998	0.43432	0.42699	-0.43813	-0.43281	-0.44462
							0.83663	-0.73412	-0.66408	0.62891	-0.59464	0.55366	-0.52464	-0.51003	0.48731	0.48052	-0.4598	0.45381	0.45387	0.434	-0.44675	-0.44004	0.42834	-0.43034	-0.43476	-0.42736	-0.4384	-0.43296	0.44482
							0.83724	0.73455	0.66467	0.62892	0.59511	-0.55458	0.52522	-0.51009	-0.48765	-0.4806	0.46014	0.45406	-0.45427	-0.43453	-0.44766	0.44017	-0.42882	0.43054	0.43525	-0.42762	0.43843	0.43309	-0.44492
							0.83757	0.73496	0.66531	0.62922	0.59558	-0.5548	-0.5253	0.51032	-0.48766	-0.48128	0.46037	-0.45412	0.45435	-0.43551	0.44833	-0.44056	0.42889	-0.4311	0.43561	0.42779	-0.43888	-0.43315	0.44527
							0.83837	0.73568	-0.66632	-0.62939	-0.5961	0.5552	-0.52561	0.51087	0.4878	0.48138	-0.46038	-0.45443	0.45444	-0.43569	-0.44857	-0.44058	-0.42997	0.43124	0.43614	-0.42806	0.43946	-0.43323	-0.44537
							-0.83994	0.73652	0.66664	-0.62967	0.59614	-0.55534	0.5261	-0.51129	0.48923	-0.48144	0.46146	0.45579	-0.45493	-0.43573	0.44865	0.44065	0.4304	-0.43126	0.4366	-0.42837	0.43969	0.43333	0.44539
							0.84009	-0.73713	-0.66669	0.62987	0.59653	-0.55551	0.52665	-0.51135	-0.48955	0.48194	-0.46185	0.45604	0.45518	0.43577	-0.44898	0.44075	-0.4305	-0.43165	0.43671	0.42899	-0.43969	0.43422	0.44545
							0.84266	0.73721	-0.66688	0.6309	-0.59756	0.55553	0.52805	-0.51165	-0.48994	0.48198	0.46253	-0.4567	0.45531	0.43608	-0.44901	0.44111	0.43187	-0.43205	0.43682	0.42914	-0.43979	0.43446	0.44565
							0.84299	-0.73795	0.6673	0.63116	-0.59863	0.5561	0.52827	-0.51181	-0.48997	-0.48211	-0.46259	-0.45686	-0.45543	-0.43609	0.44915	0.44208	-0.43252	0.43222	0.43702	-0.42915	0.44004	0.43463	0.44633
							-0.84318	0.74004	0.66826	0.63178	0.59864	-0.55621	0.52831	0.51198	0.49023	0.48284	-0.46373	0.45731	-0.45546	-0.43619	-0.44918	-0.44224	-0.43261	0.43237	0.43756	0.42931	-0.44016	0.43501	-0.44663
							0.84348	0.74039	-0.66869	-0.63191	-0.59874	-0.55634	0.52875	0.51238	0.49044	-0.4829	-0.46393	-0.45781	-0.45626	-0.43647	-0.44952	0.44321	0.43274	0.4324	-0.43771	-0.4294	-0.44027	0.43531	0.44685
							0.84362	0.74099	0.66925	-0.6324	-0.5999	0.55666	0.52915	0.51261	-0.49046	-0.48353	0.46407	0.45806	0.45639	0.43677	-0.44973	-0.44322	0.43292	0.43248	0.43783	0.42972	0.44028	0.4355	0.44709
							0.84394	0.74181	0.66977	0.63308	-0.60006	-0.55799	0.52948	0.51353	0.49107	-0.48437	0.46438	0.45818	-0.45656	0.43693	-0.44986	0.44388	-0.433	-0.43251	-0.43794	0.42973	0.44052	0.43597	-0.44735
							0.8441	-0.74193	-0.66989	0.6331	0.60011	-0.55812	-0.52951	-0.51353	-0.49114	0.48445	0.46462	-0.45881	0.45674	-0.43727	-0.45015	-0.44429	-0.43328	-0.43271	-0.438	-0.4298	-0.44059	0.43602	0.44771
							0.84417	-0.74203	-0.67014	0.63319	-0.60064	0.55892	0.52999	-0.51391	0.49139	0.48454	0.46483	0.45933	-0.45713	0.4373	0.45119	-0.44442	-0.43354	0.43275	-0.43868	0.43015	-0.44113	0.43623	-0.44783
							0.84455	-0.74232	0.67064	-0.63356	0.60085	0.55907	-0.53091	0.51425	-0.49161	0.48459	-0.46487	-0.46019	0.45773	0.43747	0.45152	0.44461	0.43376	0.43283	-0.43881	-0.4306	0.44117	-0.43634	-0.4479
							0.84549	0.74245	-0.6714	0.63359	0.60121	-0.5592	0.53136	-0.51449	0.49227	0.48508	0.46529	-0.46084	0.45795	0.43754	0.45281	-0.44501	-0.43443	-0.43293	-0.43913	0.43061	-0.44137	0.43698	0.44816
							0.84555	0.74272	0.67155	-0.63367	-0.6013	0.55948	0.5317	0.51461	-0.49262	-0.48515	0.46529	0.46087	0.45811	-0.43764	0.45298	0.44518	0.43489	-0.43308	0.43915	-0.43092	-0.44144	-0.43711	-0.44854
							0.84557	-0.74298	-0.67231	0.63379	0.60177	-0.55977	0.53171	-0.51547	-0.49273	0.4853	0.46562	-0.46194	0.45858	-0.43774	-0.45354	-0.44528	-0.43505	-0.43316	0.43925	0.43142	0.44172	0.43734	-0.44888
							0.84732	0.74321	0.67238	0.63394	0.602	0.56206	0.53276	-0.51615	-0.49275	0.48557	0.46587	-0.46233	-0.45875	0.43816	0.45373	0.4453	0.43565	-0.43319	-0.43925	-0.43151	0.44179	-0.4377	0.44933
							0.84774	0.74362	0.67252	-0.63479	0.60298	-0.56286	-0.53318	-0.51635	-0.49349	0.48567	0.46671	0.46264	0.45888	0.43905	0.45378	0.44538	-0.43589	0.43321	0.43952	0.43169	0.44181	-0.43785	0.44988
							0.84829	0.74366	-0.67454	-0.63516	-0.60335	0.56296	0.53397	0.51649	0.49357	0.48584	-0.4669	-0.46301	0.45974	0.43944	-0.45439	-0.44546	0.43592	0.43327	0.43962	-0.43265	0.44189	0.4381	0.45071
							0.84839	0.74498	0.67631	0.63525	-0.60347	0.56328	-0.53493	0.51722	-0.49405	-0.48585	0.4672	0.46353	-0.45977	0.43954	0.45446	-0.44594	0.43606	0.43363	0.43967	0.43292	-0.44222	0.43832	-0.45078
							0.84892	0.74539	-0.67654	0.63581	0.60584	-0.56442	0.53544	0.51786	0.4942	-0.48622	-0.46791	0.46357	0.46233	0.43957	0.45471	0.44619	0.43624	0.43371	0.44013	-0.43361	0.44257	0.43843	0.45119
							0.84968	0.74546	0.67684	-0.63668	0.60642	-0.56445	0.53581	-0.51811	0.49445	-0.4863	0.4683	-0.4643	0.46247	0.44011	-0.45561	-0.44696	0.43629	-0.43393	0.44014	-0.43368	0.44334	-0.43859	0.45124
							0.85075	0.74624	0.67734	0.63712	-0.60683	0.56453	-0.53636	0.51836	-0.49448	-0.48633	-0.46837	0.46495	0.46285	-0.44032	0.45582	0.44706	0.43633	-0.43408	-0.44031	0.43372	-0.44368	-0.43864	-0.45128
							0.85256	-0.74628	0.67739	0.63763	0.60703	-0.56453	0.53697	-0.51863	0.49469	0.48655	0.4688	0.46515	0.46305	-0.44059	0.45623	0.44762	-0.43662	0.43438	0.44037	-0.4346	-0.44379	-0.43878	-0.45145
							0.8531	-0.74637	-0.67783	0.63786	0.60841	-0.56535	0.53723	-0.5204	0.49469	-0.48658	0.46913	0.46517	-0.46313	-0.44119	0.45678	-0.44776	-0.43722	-0.43465	-0.44049	-0.43513	0.44448	-0.43931	-0.45184
							0.85354	-0.7464	0.6779	0.63877	0.60842	0.56543	-0.53747	0.52072	0.4947	0.48723	0.46946	0.46525	-0.46364	0.44125	-0.45715	-0.44867	-0.43745	-0.43484	-0.44068	-0.4355	-0.44453	0.43947	0.45197
							0.85428	0.74668	0.67846	0.63917	-0.60878	0.56585	0.53788	0.52112	0.49477	0.48725	-0.46978	-0.46546	0.46408	-0.44133	0.45748	-0.4488	0.43791	-0.43515	0.44093	-0.43563	0.44455	0.43983	0.4522
							0.85585	-0.74695	0.67907	0.63931	0.60935	-0.56589	0.53795	0.52123	-0.49477	-0.48748	-0.47015	0.46558	-0.46423	0.44196	-0.45756	-0.44899	-0.43815	-0.43519	-0.44122	0.43564	0.44459	-0.43983	0.4528
							0.8561	0.7487	-0.67971	0.63938	-0.61128	-0.56673	0.53813	0.5215	0.49494	-0.4885	0.47252	-0.46568	-0.46464	-0.44273	-0.45759	0.44988	-0.43888	-0.43531	-0.44151	0.43609	-0.44468	-0.44067	0.45326
							0.85649	-0.74918	-0.67983	-0.63957	-0.61152	0.56733	0.53866	-0.52174	0.49551	0.48874	0.47254	0.46631	0.46538	0.44313	-0.45759	-0.45011	-0.43917	-0.4355	0.44209	-0.43618	0.44573	0.44104	-0.45329
							0.85658	0.75156	-0.68046	0.63987	-0.61298	0.5674	0.53871	0.52247	-0.49555	0.48994	0.47278	-0.46632	0.46572	0.44326	0.45765	0.4503	0.43918	-0.43568	-0.44221	-0.4362	-0.44582	0.44132	0.45338
							0.8567	0.75244	-0.68059	0.64066	0.6136	0.56742	0.53914	0.52282	0.49566	-0.48998	0.4728	-0.46707	-0.46584	0.44344	-0.45788	-0.45056	0.43951	0.43569	-0.44235	-0.43636	-0.44627	-0.44135	-0.45374
							0.85686	-0.75278	0.68207	0.64098	-0.61391	-0.56753	-0.53956	-0.52331	0.49648	0.4904	-0.47295	-0.46756	0.46587	0.44396	0.45815	0.45091	0.44022	-0.43594	-0.44239	-0.43652	0.44655	0.44145	-0.45395
							0.8571	-0.75284	0.68211	0.6418	0.61403	-0.56767	0.54	0.52369	-0.4966	0.49042	-0.47296	0.46758	-0.4662	-0.44415	0.45868	0.45168	-0.44037	-0.43602	0.4426	-0.43738	-0.44665	0.4415	0.45467
							-0.85854	0.75293	0.68217	0.64277	-0.61413	0.56786	-0.54044	0.52414	0.4969	0.49096	0.47411	-0.4684	0.46645	0.44424	-0.45918	-0.45194	-0.44143	0.4362	0.44294	-0.43761	0.44678	0.44175	0.45475
							-0.85862	0.75358	0.68221	-0.6431	0.61488	0.56795	0.54072	-0.52444	0.49724	0.49107	0.47421	-0.46852	0.4669	-0.44456	0.45929	0.45202	-0.44149	0.43622	0.44329	0.43762	0.44699	-0.4419	0.45491
							0.86043	0.75373	-0.68266	0.64366	-0.61499	-0.56845	0.54106	0.52491	-0.49731	-0.49108	0.47567	-0.46907	-0.46717	0.44533	0.45937	0.45254	0.44179	-0.43692	0.44341	0.43828	-0.44715	-0.44251	-0.45528
							0.86215	0.75487	0.68269	0.64513	-0.61592	0.56862	0.54115	0.52549	-0.49785	0.49175	-0.47575	-0.4691	0.46776	-0.44552	-0.45947	-0.45273	-0.44228	-0.43813	0.44343	0.43886	0.44736	-0.44293	0.45561
							-0.86241	0.75488	-0.68299	0.64581	0.61628	0.56936	0.54253	-0.52587	0.49797	0.49217	-0.47584	-0.46929	-0.46776	-0.44559	0.46051	-0.45286	0.44263	-0.43823	-0.44352	0.43928	0.44758	-0.44317	0.45568
							-0.86242	0.75516	0.68311	0.64594	0.61633	0.57058	-0.54272	0.52626	0.49839	0.49284	0.47592	-0.46968	0.46788	-0.44585	-0.46108	0.45308	-0.44305	0.43841	0.44363	0.43979	-0.4484	-0.44321	0.4564
							0.86257	0.75529	0.68315	-0.64674	-0.61634	0.57065	0.54332	0.52675	0.4987	-0.49295	0.47635	-0.47007	0.46885	0.44594	-0.46109	-0.45326	0.44354	-0.43844	0.44388	0.44049	-0.4487	-0.44332	-0.45785
							0.86269	0.75537	0.68352	0.64721	-0.61648	0.57152	0.54353	-0.5269	-0.4989	-0.49323	0.47662	-0.47017	0.46889	0.44603	-0.46113	0.45328	-0.44376	0.43871	-0.44392	-0.44089	-0.44879	0.44358	-0.45794
							0.86367	0.75561	-0.68356	0.64728	-0.61651	-0.57171	0.54363	0.52741	0.49919	-0.49384	0.47674	0.47045	0.46908	-0.44605	0.46115	0.45356	-0.444	0.43872	0.44393	-0.44093	0.44925	-0.44358	0.45824
							0.86373	0.75659	0.68387	0.64773	-0.61667	0.57186	0.54399	0.52762	-0.49926	-0.49419	-0.47676	0.47064	-0.46914	0.44625	0.46126	0.4536	-0.44445	-0.43887	-0.44394	0.44115	-0.44979	-0.44364	-0.45828
							-0.86377	0.7566	0.68403	0.64796	-0.61684	-0.57243	-0.54416	0.52844	-0.5	0.49469	-0.47681	-0.47097	-0.46933	0.44651	0.4613	-0.45381	0.4451	-0.43903	0.44571	-0.4417	-0.45004	0.44441	0.45833
							0.86471	0.75665	0.68574	-0.64804	0.61793	-0.57287	-0.54484	0.52865	0.50025	0.49492	0.47755	-0.47156	-0.46951	0.44677	-0.46142	0.45413	0.44523	-0.43993	-0.44588	0.44183	0.45015	-0.44467	-0.45833
							0.8656	0.75744	0.68591	0.64859	-0.61858	0.57303	0.54521	-0.52971	0.50059	0.49543	0.47767	0.4718	0.46964	-0.4469	0.46154	-0.45453	0.44599	-0.44067	0.44613	-0.4423	0.45034	0.4448	-0.4584
							0.86678	0.75877	0.68632	0.64974	0.61978	-0.57333	0.5453	0.53018	-0.50106	0.49544	0.47822	-0.47187	0.47013	0.44698	-0.46158	0.4549	-0.44618	-0.44095	-0.44631	0.44268	0.45079	-0.4449	0.4587
							0.86711	0.75885	0.68634	-0.65121	0.61986	0.57375	0.54567	-0.53072	0.50122	-0.49568	0.47858	0.47202	0.47047	0.44768	-0.46171	-0.45509	-0.44668	-0.44137	-0.44634	0.44273	0.45093	0.44494	0.45898
							0.86728	0.75999	0.6864	-0.65259	0.62175	-0.57438	0.54595	-0.53092	0.50163	0.4959	-0.47873	-0.47206	0.47067	0.44857	0.46174	-0.45512	-0.44687	-0.44164	0.44637	-0.44285	-0.45139	0.4457	-0.45905
							0.86789	0.76012	0.68643	0.65273	0.6218	0.57456	-0.54595	-0.53135	0.50187	-0.49593	-0.47923	0.47224	0.47091	0.44871	0.46188	0.45521	0.44722	0.4417	0.44702	-0.4429	-0.45145	0.44572	-0.45914
							0.86808	-0.76046	0.68736	0.65333	0.62246	0.57597	0.54624	0.53142	-0.50192	0.49605	-0.47936	0.47227	0.47178	0.44891	0.46209	0.45539	-0.44746	-0.44207	0.44724	-0.4432	-0.45214	-0.44581	-0.45925
							0.86827	-0.76088	0.68748	0.65333	0.62278	0.5763	0.54632	0.53189	-0.50208	-0.49639	-0.47956	0.47233	-0.47194	0.44912	-0.4623	-0.45572	-0.44791	0.44218	0.44789	-0.44327	0.45259	0.44601	-0.46016
							0.8686	0.76171	0.68783	-0.65356	0.62294	0.57675	-0.54666	-0.53293	-0.50221	0.4964	0.47964	0.47258	0.47306	-0.44993	0.46246	-0.45647	-0.44885	-0.44246	0.44823	0.44354	0.45299	-0.44622	-0.46086
							-0.86918	0.76207	-0.68814	0.65371	-0.62303	0.57686	-0.54688	0.53352	0.50305	0.4968	0.47979	0.47288	-0.47324	-0.45049	0.46264	0.45651	0.44946	0.44254	-0.44852	0.44403	0.45299	-0.44622	-0.461
							0.87125	0.76231	0.68877	0.65402	0.62319	0.57756	0.54717	-0.53353	0.5031	0.49696	0.47985	-0.47353	0.47351	0.45059	-0.46266	-0.45676	0.44981	-0.44345	0.44886	-0.4445	-0.45314	-0.44646	-0.46155
							0.87207	0.76233	0.68956	0.6541	0.62486	0.57855	0.54734	0.53359	-0.50332	0.49696	-0.48008	0.47414	0.47396	0.45087	-0.46282	-0.4569	0.44984	0.44348	-0.44952	0.44471	0.45331	-0.4472	0.46169
							0.87292	0.7634	-0.69021	-0.65446	0.62491	0.58126	-0.54831	0.53361	0.50339	0.49725	-0.48051	0.47415	-0.47447	-0.45095	0.46307	-0.45737	0.45044	-0.44435	-0.44954	-0.44553	-0.45338	-0.44739	-0.46303
							0.87325	0.76398	0.69046	0.65463	0.62512	0.58127	0.54834	-0.53414	0.50375	-0.49748	-0.48103	0.47464	0.47565	0.45132	0.46315	0.45743	0.45061	-0.44454	-0.4498	0.44595	-0.45342	0.44781	0.46332
							0.8734	0.764	0.69057	-0.65514	0.62518	-0.5813	-0.5485	-0.53453	0.505	0.49761	0.48123	0.475	-0.47583	0.45134	0.46358	-0.45752	-0.45143	0.44515	0.45	-0.44598	-0.45369	0.44804	0.46464
							0.87402	0.76491	0.69108	-0.65527	0.62558	0.58208	0.54952	0.53499	0.5052	0.49815	-0.48126	0.47514	-0.47599	0.45139	0.46388	0.45762	0.45163	-0.44518	-0.45073	0.44621	0.4537	-0.4482	-0.46464
							0.87445	-0.76508	0.69113	0.65552	0.62607	-0.58214	0.54976	0.53548	0.50526	-0.49845	0.48159	-0.47526	0.47625	0.45192	0.46395	-0.45789	0.45174	-0.44619	0.45104	-0.44644	0.45415	0.44821	-0.46482
							0.87581	-0.76524	0.692	0.65668	0.62618	0.58246	-0.54988	0.53588	0.50537	0.50002	0.48209	-0.4757	-0.47689	-0.45199	-0.46406	0.45811	0.45217	0.44622	0.45105	0.44651	0.4546	0.44829	-0.46496
							0.87582	0.76543	0.6924	0.65742	0.62645	0.58291	0.55005	0.53595	-0.50543	0.50049	0.48212	0.47587	0.47702	0.45251	0.46427	-0.45819	0.4529	0.44627	-0.4512	0.44666	0.45483	-0.44835	-0.46546
							0.87707	-0.76724	-0.69264	-0.65761	0.62672	0.58331	0.55007	0.53633	0.5069	-0.50066	-0.48221	-0.47587	0.47755	0.45253	-0.46434	0.45843	0.45325	-0.44633	0.45122	0.44673	0.45542	-0.44936	0.46601
							0.87831	0.76849	-0.69282	0.65846	-0.62711	-0.58334	-0.55029	0.53672	-0.50783	0.5008	-0.48234	0.4761	-0.47764	-0.45275	-0.46442	0.45924	0.45332	0.44672	0.45142	0.44719	0.45589	0.45176	-0.46626
							0.87846	0.76944	-0.69318	0.65852	-0.62735	0.5835	0.55041	-0.5368	0.50823	0.50098	0.48261	0.47648	-0.4778	-0.4529	0.46475	-0.45992	-0.45372	0.4468	-0.45175	-0.4476	-0.4566	-0.45198	0.4664
							0.87908	-0.76948	-0.69337	0.65873	-0.62775	-0.58427	-0.55044	0.53688	-0.50827	-0.50122	0.48262	0.47736	0.47796	-0.45302	0.46503	0.46027	-0.45431	-0.44692	0.452	0.44769	0.45668	-0.452	-0.46646
							0.8793	0.76963	0.69338	-0.65919	0.6278	0.5846	-0.5505	0.53701	-0.50836	-0.50122	0.48297	0.47756	-0.47812	0.45306	0.46519	0.46054	0.45448	0.44757	0.45234	-0.44783	-0.45686	-0.45237	0.46655
							0.87933	0.76983	0.69342	0.6592	-0.62784	0.58603	-0.55067	0.53783	0.50856	-0.50142	-0.48323	0.47839	0.47815	-0.45318	0.46523	0.4607	-0.4547	0.44764	0.45272	0.44857	0.45705	0.4526	0.46666
							0.87954	-0.77069	-0.69371	0.66077	0.62797	-0.58619	0.55166	0.53784	0.50864	-0.50156	0.48333	-0.47846	0.47833	-0.45392	-0.46552	0.46079	0.45485	-0.44775	0.45286	-0.4493	-0.45741	-0.45332	-0.46734
							0.88024	0.7713	0.6943	0.66163	0.62901	0.58646	-0.5517	-0.5385	0.50944	0.50201	0.48388	-0.47878	-0.47836	-0.45392	-0.46624	0.4609	0.45498	0.44824	-0.45289	0.44938	0.45771	-0.45336	0.46769
							0.88258	-0.77249	-0.69441	-0.66184	0.62946	0.5868	0.55226	0.53897	0.51079	-0.50234	0.48488	0.47885	0.47864	-0.45462	0.46637	0.46116	-0.45595	0.44894	0.45345	0.44946	0.45775	-0.45342	-0.46771
							0.88314	0.77312	0.69509	-0.66327	0.62985	0.58703	0.55319	-0.53927	-0.51135	0.50267	-0.48512	0.4791	0.47877	0.45496	-0.46697	0.46182	-0.45642	0.44979	0.45393	-0.44993	-0.45779	-0.45365	-0.46773
							0.88416	0.77506	0.69543	0.6639	0.63024	0.58703	0.55319	0.53935	0.51148	0.50285	0.48541	-0.47912	-0.47877	0.45532	0.46714	-0.46182	-0.45644	-0.4498	0.45412	-0.45005	0.45785	-0.45416	-0.46825
							0.88438	-0.77603	-0.6955	-0.66454	-0.63101	0.58716	0.55355	-0.53945	0.51164	-0.50347	-0.48557	0.47937	0.47914	-0.45559	0.46722	-0.46189	-0.45646	0.45071	0.45523	0.45095	0.45808	0.45427	0.46834
							0.88441	0.77675	0.69601	-0.66461	0.63103	0.58759	0.55391	0.54025	-0.51203	0.504	-0.48646	0.48095	0.48	0.45592	-0.46762	0.4619	-0.4567	-0.45073	0.45535	-0.45109	-0.45892	0.45444	0.46851
							0.88444	0.77681	-0.6966	0.66522	0.63146	-0.58772	-0.55394	-0.54031	0.51207	0.50402	0.48682	-0.48099	-0.48026	-0.4562	0.46904	0.46211	-0.45675	0.45084	-0.45535	-0.4513	-0.45913	0.45456	0.46854
							0.88445	0.77682	0.69755	0.6655	0.63164	0.58776	0.55493	0.54143	0.51219	0.50409	0.48728	-0.48132	-0.48134	0.45636	-0.4691	0.46246	-0.45707	0.45201	-0.45544	-0.45152	-0.46	-0.45483	0.46889
							0.88521	-0.77934	0.69821	0.6655	0.63177	0.58847	0.55511	0.54154	-0.51225	-0.50426	-0.48743	0.48135	0.48228	0.45645	0.46936	-0.46254	0.45729	0.4522	0.45546	0.4517	0.46005	0.4558	-0.46932
							0.88566	-0.78016	-0.69848	-0.66562	0.63214	0.5885	-0.55533	-0.54204	0.51227	0.50437	-0.4875	-0.48141	0.48288	-0.45718	0.46956	0.4637	0.45767	-0.4523	0.45557	-0.452	0.46033	-0.45626	-0.46934
							0.88604	0.78042	0.6986	-0.66574	0.63226	0.58868	0.55558	0.54291	-0.51286	-0.50438	-0.48832	0.48154	-0.48289	0.45753	0.46984	0.4637	0.45782	-0.45233	-0.456	-0.45204	0.46044	0.45695	0.47014
							0.88615	0.78043	0.69888	0.66579	0.63286	0.58889	-0.55567	0.54297	-0.51292	-0.50446	-0.48839	0.48171	-0.48302	-0.45767	0.4704	-0.46398	0.45795	-0.45234	0.45643	-0.45316	0.46071	-0.45709	-0.47029
							0.8864	-0.78138	0.69972	0.66597	0.63415	-0.58899	-0.55598	-0.54298	0.51314	-0.50464	0.48849	0.4821	0.48305	0.45777	0.47043	-0.46403	-0.458	0.4524	0.45744	-0.45442	-0.4608	0.45722	0.47042
							0.88823	0.78148	0.70114	-0.66619	0.63421	0.59053	-0.55674	0.54345	0.51374	-0.50474	-0.48852	0.48241	-0.48354	0.45808	0.47044	0.46417	-0.4586	0.4531	0.45772	0.4545	0.46082	0.45722	0.4705
							0.88928	0.78156	-0.7013	0.66726	0.63445	-0.59062	0.55709	0.544	-0.51386	-0.50491	0.48949	-0.483	-0.48357	-0.4589	-0.4711	-0.46431	0.45874	-0.45318	0.45774	-0.4547	0.46099	-0.45753	-0.47083
							-0.88998	-0.78239	0.70142	-0.66733	-0.6346	0.59069	0.55722	-0.5451	-0.51413	-0.50491	-0.49004	0.48304	0.48361	0.45901	-0.47166	0.46461	-0.459	0.45341	-0.45783	-0.45475	-0.46156	0.45795	0.47085
							0.89161	0.78288	0.70204	0.66756	0.63484	-0.591	0.55726	0.54534	0.51426	0.50494	0.49083	0.48311	-0.48362	0.45919	0.47176	-0.46466	-0.45914	0.45392	0.45814	-0.45482	-0.46182	0.45834	0.47085
							0.89188	0.78318	0.70264	0.6681	0.63523	0.59117	-0.55773	0.54573	0.51534	0.50567	0.49111	0.4854	-0.48374	0.45974	-0.47189	0.465	0.45942	0.45399	0.45824	-0.45492	-0.46197	-0.45854	0.47094
							0.89456	0.78328	0.70272	0.66867	0.63632	0.59146	-0.55785	0.54616	0.51554	-0.50591	0.49115	-0.4854	0.48386	0.46036	-0.47203	-0.46597	-0.46038	-0.45412	0.45853	0.45501	-0.46216	0.45884	0.47102
							0.89536	0.78416	0.70277	-0.66884	0.63673	0.59147	0.5579	0.54707	0.51564	0.50611	-0.49184	0.48567	0.48406	0.46094	-0.47251	-0.46652	-0.46052	0.45452	0.45868	-0.45505	-0.46242	-0.45898	-0.47199
							0.89546	0.7849	0.70286	0.67011	-0.63784	-0.59174	0.55845	-0.54712	-0.51621	0.50627	-0.49245	-0.48619	-0.48411	-0.46109	0.47276	0.46692	0.4609	-0.45516	0.45871	0.45546	-0.46299	0.45917	0.47211
							0.8955	-0.78588	0.7033	-0.67052	0.63808	-0.59255	0.55896	-0.54741	0.51647	-0.50666	0.49248	-0.48641	0.48423	-0.4612	0.47286	0.46695	0.46096	-0.45567	0.45915	0.45615	0.46304	-0.46011	0.4724
							0.89574	0.78597	0.70381	0.6709	0.63826	0.59259	0.55919	-0.54778	0.51668	-0.50678	0.49262	0.48669	0.48467	-0.46162	-0.47322	0.46706	-0.46146	0.45619	0.45974	-0.45625	0.46329	-0.46037	-0.47271
							-0.89574	0.78642	0.70391	-0.67098	0.6384	-0.59312	0.55923	0.54829	0.51692	0.50693	0.49273	-0.4874	0.48485	0.4617	0.47347	0.46884	-0.4616	0.45626	-0.45992	-0.45629	-0.46367	0.46043	-0.47295
							0.89593	0.78747	0.70413	0.67218	-0.63864	0.59334	0.55924	0.5487	-0.51727	0.50699	-0.49321	0.48907	-0.48489	0.46242	0.4735	-0.46884	-0.46176	-0.45637	0.45994	-0.45708	0.46453	0.46044	0.47325
							0.89658	0.78857	0.70694	-0.67287	-0.63875	0.59338	-0.55956	0.54946	0.51742	0.50752	0.49332	0.48919	-0.48511	0.46245	-0.47401	0.46896	-0.46233	-0.4573	-0.45996	-0.45726	0.46475	0.46045	0.47342
							0.8966	0.78896	0.70793	0.67346	0.63896	0.59361	0.55961	0.54979	-0.51743	0.50758	0.49378	0.48948	0.48541	0.46278	0.47413	-0.46899	-0.46264	0.45736	-0.46027	0.4573	0.46482	-0.46053	-0.47384
							0.89733	0.78947	0.70797	0.67363	0.63969	0.59435	0.55967	0.54983	-0.5176	-0.50867	-0.49404	-0.49113	0.48553	-0.46371	0.47609	-0.46936	-0.46288	-0.45761	-0.46036	-0.45801	-0.46501	-0.461	0.47415
							-0.89877	-0.79052	0.70823	-0.67386	0.64111	-0.59437	0.56028	0.55002	0.51776	-0.50974	-0.49432	-0.49195	-0.4856	-0.46412	0.47655	-0.46958	-0.46373	0.45768	0.46053	-0.45803	-0.46508	0.46104	-0.47438
							0.89955	0.79079	0.70857	-0.67467	0.64179	-0.59453	0.56126	0.55005	0.51806	0.51	0.49477	-0.49237	0.48755	0.4643	0.47686	-0.47028	0.46381	0.45793	0.46093	0.45812	-0.46513	0.46105	-0.47473
							0.90023	0.79219	0.7092	0.67486	0.64199	0.59466	0.56152	0.55138	0.5182	0.51045	0.4949	0.49238	0.48759	0.46451	0.47697	0.4711	-0.46405	0.4583	0.46147	0.45919	-0.46565	-0.46135	0.47514
							0.90045	0.79235	0.70922	0.6753	-0.64218	0.59566	-0.5621	-0.55165	0.51861	0.51052	-0.49543	0.4926	-0.48777	0.46476	0.47702	-0.47121	0.46428	-0.45889	-0.46161	0.45927	-0.46577	0.46139	0.4754
							0.90069	0.79287	0.70965	-0.67606	0.64226	0.5965	-0.56352	-0.55188	0.51896	0.5107	0.49571	0.4932	0.48815	-0.46521	0.47779	-0.47156	0.46428	0.45909	0.46176	0.45983	-0.46588	-0.46166	-0.4756
							0.9007	-0.79294	-0.70971	-0.67608	-0.64234	0.59659	0.56418	-0.55204	0.51913	-0.5107	0.49739	0.49411	0.48863	0.46544	0.47831	-0.47208	0.46431	0.45926	-0.46193	0.46014	-0.46661	0.46179	0.47566
							-0.90198	-0.79415	0.70982	0.6766	-0.64373	0.59676	0.5646	0.55205	0.51985	0.5109	0.49748	0.49436	-0.48863	0.46602	0.47844	0.47223	-0.46451	-0.45941	0.46288	-0.46017	0.46688	-0.46224	0.47592
							0.90221	0.79455	0.70986	-0.67685	0.64377	0.597	-0.56491	-0.55248	0.51995	0.51105	-0.4979	0.49478	0.48866	0.46624	-0.4788	-0.47273	0.46536	-0.45942	0.46302	0.46062	-0.46715	0.46275	-0.47596
							0.90372	0.79493	0.71015	0.67695	-0.64403	0.59761	0.56529	0.55256	0.52155	-0.51124	0.49798	0.49524	-0.489	-0.46663	0.47918	0.47321	0.4656	-0.46021	-0.46332	0.46108	0.46718	0.46275	0.47649
							0.90386	-0.79495	0.71031	0.67711	-0.6446	0.59817	0.56543	0.55315	-0.52171	-0.5115	0.49813	0.49528	-0.48929	0.46673	0.47933	0.4741	-0.46561	0.46028	0.4638	0.46173	-0.4673	0.4629	0.47667
							0.90467	-0.79609	0.71133	0.67741	-0.64461	0.59844	-0.5662	-0.5534	-0.52233	-0.5116	0.49839	-0.49541	0.48955	-0.46681	-0.47955	-0.4742	-0.4661	0.46037	-0.46383	-0.46203	-0.46751	-0.46346	0.47682
							0.9047	0.79666	0.71186	-0.67775	0.64527	-0.59905	-0.5673	0.55388	0.52238	-0.51202	0.49864	-0.49553	-0.4902	0.46721	0.47964	-0.47487	-0.46612	-0.46049	-0.46409	-0.46238	0.46814	0.46358	0.47691
							0.90556	0.79766	0.71193	0.67834	0.64558	0.59909	-0.56799	0.55426	0.52241	0.5123	0.49882	0.49597	0.49029	-0.46777	-0.48041	0.47504	-0.46653	-0.46063	-0.46444	0.46276	0.46818	0.46377	-0.47704
							-0.9059	0.79778	0.7121	0.67855	0.64559	0.5994	-0.56858	-0.55427	-0.5227	0.51252	0.49912	-0.49616	0.49057	0.46791	-0.48054	0.47561	-0.46714	0.46156	-0.46509	0.46294	0.46862	0.46465	0.47721
							0.90721	0.79797	0.71219	0.67879	0.64801	0.59959	-0.56882	0.55476	-0.52291	0.51362	-0.49978	0.4964	-0.49085	-0.46791	0.48059	-0.47632	0.46724	0.4616	0.4652	0.46308	-0.4687	0.46502	-0.47843
							0.90737	0.79823	0.7123	-0.67947	0.64805	-0.60015	0.56925	-0.55481	0.52325	-0.5139	0.50025	0.49644	0.49144	-0.46819	-0.48082	0.47646	-0.46792	-0.46164	0.46523	-0.46308	0.46941	-0.46518	-0.47854
							0.90767	0.79855	0.71253	0.67962	-0.65002	-0.60045	0.56989	-0.55504	0.52368	0.51393	0.50027	0.49735	0.49153	-0.46836	-0.48084	0.47763	0.46809	-0.46174	-0.46531	0.46309	-0.47015	0.46532	0.47891
							0.90868	0.79876	0.7128	-0.67986	0.65014	-0.60088	-0.57009	-0.55565	-0.52374	0.51394	-0.50101	0.49759	-0.49236	-0.4684	-0.48088	0.47771	-0.46833	-0.46256	-0.46561	0.46368	-0.47032	0.46548	0.47939
							0.90959	0.79885	0.71281	0.67992	0.65049	0.60091	-0.57016	0.55581	0.52426	0.51431	0.50118	0.49777	-0.49251	0.46841	0.4815	-0.47796	0.46844	0.46286	-0.46591	-0.46368	-0.47044	-0.46655	-0.47953
							0.90961	-0.80088	-0.71289	0.68015	0.65072	-0.60091	0.57025	-0.55697	0.52479	-0.51461	-0.50118	-0.49816	-0.49265	-0.46869	0.48155	0.47814	0.46904	-0.46327	-0.46613	-0.46409	-0.47055	-0.46672	0.47968
							0.90978	0.80091	-0.71324	0.68157	0.65277	-0.60095	0.57067	0.55727	0.52483	-0.51473	-0.50164	0.4983	0.49313	-0.46885	0.48159	-0.47939	0.46917	0.46347	-0.46661	0.46423	0.47057	0.46677	0.47979
							0.91316	-0.80102	-0.71363	0.68209	0.65328	-0.60113	-0.57071	0.55731	-0.52525	-0.51513	0.50208	0.49878	-0.49326	-0.46922	0.48171	-0.4795	0.46977	-0.46353	-0.46678	-0.46431	-0.47062	0.46688	-0.4798
							0.91351	0.80159	0.7138	0.68211	0.65415	0.60122	0.57177	-0.55739	0.52528	0.51603	-0.50248	0.49914	-0.49351	0.46935	-0.4819	0.47957	0.46991	0.46379	-0.46691	-0.46472	0.47095	0.46724	-0.4805
							0.91418	0.80258	-0.71384	0.68253	0.65417	0.6014	0.57203	0.55752	0.52531	-0.5161	0.50262	0.49922	-0.49368	-0.46967	0.48193	0.47975	0.47004	0.46382	0.46752	0.4652	0.471	-0.46736	0.48054
							0.91452	0.80338	0.71473	0.68265	0.65435	0.6015	0.57221	0.55822	-0.5261	0.51638	-0.5029	-0.49971	0.49417	0.4699	0.482	-0.47975	0.47005	0.46418	0.46762	-0.46521	-0.47103	-0.46738	0.48306
							0.91537	0.8036	0.71589	-0.68326	0.65452	0.60225	-0.57267	-0.55967	-0.52612	0.51652	-0.50303	0.49996	0.4944	0.47044	0.48206	0.47995	0.47005	-0.46429	-0.46766	-0.46525	0.47149	-0.46761	-0.48333
							-0.91543	-0.80365	0.71633	0.68392	0.6548	-0.60228	0.57278	0.55976	0.52715	-0.51752	0.50341	-0.50033	0.4949	-0.47067	0.48364	-0.48013	-0.47081	0.46434	-0.46767	0.46535	-0.4715	0.46817	-0.48338
							0.91557	0.804	0.71731	-0.68401	0.6555	0.60267	0.57285	0.55998	-0.52747	-0.51838	-0.50348	-0.50068	-0.495	0.47081	-0.48368	0.48047	0.47091	-0.46487	-0.46848	0.46599	-0.47165	0.46837	0.48343
							0.91613	0.80428	0.71773	0.68405	0.65637	-0.60278	0.57313	0.56055	0.52792	0.51842	-0.50388	-0.50097	0.4953	0.47091	0.48412	-0.48053	-0.47123	-0.46503	-0.46871	-0.46664	0.47171	-0.46848	0.48361
							-0.91614	0.80431	0.71853	0.68446	-0.65646	-0.60307	-0.57345	-0.5607	0.52808	0.51884	-0.50467	0.50101	0.49544	-0.47109	-0.48419	-0.48081	-0.47123	-0.46503	0.46902	-0.46687	-0.47202	-0.46883	0.48372
							0.91657	0.80479	0.72035	-0.68465	0.6571	0.6034	0.57381	0.56084	0.52822	0.51904	-0.50481	-0.50196	-0.49556	0.47149	-0.48437	0.48086	-0.47143	0.46521	0.46906	-0.46779	-0.47212	-0.46902	-0.48413
							0.9177	0.80482	-0.72038	0.6854	0.65723	-0.60346	-0.57383	-0.56094	0.52848	0.51904	0.50488	0.50199	-0.49573	0.47149	-0.48444	0.48161	-0.47207	0.46553	-0.46914	-0.46886	-0.47216	-0.46981	0.48417
							0.91799	0.80609	0.72133	0.6856	0.65732	0.60375	-0.57404	-0.56189	-0.52849	-0.51919	0.50496	-0.50216	0.49577	-0.47205	-0.48462	0.48177	-0.47243	0.4656	-0.4692	0.46888	0.47244	-0.47014	-0.48452
							0.91979	0.80798	-0.72193	0.68596	0.6574	-0.60425	0.57408	-0.56244	-0.52853	-0.51919	-0.50505	0.5022	0.49583	0.47268	-0.48551	-0.482	0.47281	-0.4658	-0.46983	0.46898	-0.47257	-0.47016	-0.48469
							0.91983	0.80809	0.72211	0.68616	-0.65746	-0.60432	0.57413	-0.56307	0.52888	0.51999	-0.50538	0.50285	0.49596	0.47269	-0.48556	0.48203	0.47302	-0.46625	0.4699	0.46905	0.4728	0.47091	-0.48493
							0.92032	-0.80964	0.72219	0.68696	-0.65794	0.60515	0.57503	0.56333	0.52954	0.52002	0.50562	-0.50328	0.49609	0.47269	-0.48576	0.48218	0.47346	0.46629	0.46992	-0.46905	-0.47336	0.471	0.48543
							0.92036	0.80983	-0.72259	-0.6873	0.65827	0.60556	0.5753	0.56384	0.52957	-0.52031	0.50575	0.50338	-0.49624	-0.4727	0.48589	0.48252	-0.47408	-0.46635	-0.46998	-0.46916	-0.47363	-0.4712	-0.48608
							-0.9206	0.81053	0.72326	0.68757	0.65999	0.60578	-0.5753	-0.56426	0.52972	0.52053	0.50602	0.50339	0.49656	-0.47296	0.48651	0.48265	0.47422	0.46657	0.47057	0.46951	0.47374	0.47138	0.4866
							0.92252	0.8109	-0.72399	-0.68769	-0.66138	-0.60648	0.57654	-0.56507	-0.52973	-0.52076	0.50623	0.50425	0.49676	0.47305	-0.48711	0.48302	0.47435	0.46675	0.47103	0.46993	0.47403	-0.47141	-0.48672
							0.92273	0.81183	0.72403	0.68798	0.66189	0.60651	0.57656	0.56587	-0.5298	0.52105	-0.50737	0.50435	0.49693	0.47325	-0.48714	-0.48304	0.47435	-0.46715	0.47159	-0.47004	0.4742	0.47148	-0.4869
							0.92474	0.81186	0.72408	0.68817	0.66205	0.60693	-0.5771	-0.5659	0.53117	-0.52198	-0.50761	0.50458	0.49694	0.4735	0.48721	-0.48307	0.47456	0.46719	0.47167	0.47017	0.47431	0.47148	0.48709
							0.92548	0.81216	0.72432	0.68821	0.66288	0.60747	0.57796	-0.56649	-0.53154	-0.52215	0.50782	-0.5052	0.49736	-0.47352	-0.48737	-0.48352	-0.47486	-0.46741	0.47184	0.47021	0.4744	0.47217	0.48762
							0.92625	0.81253	0.7249	0.68822	0.66315	-0.60747	0.57801	0.56672	0.53167	-0.52217	0.50806	0.50578	-0.49749	-0.47393	-0.48846	0.48359	-0.47492	0.46748	0.47281	0.47022	0.47473	0.47221	0.48762
							0.92967	0.81256	-0.72499	0.68985	0.66335	-0.60768	0.57818	0.56686	-0.53177	0.52229	0.5083	0.50588	-0.49817	-0.47485	-0.48888	-0.48408	-0.47496	-0.46815	0.47312	0.47028	0.475	-0.47281	0.48828
							0.93072	0.81335	-0.72577	0.68985	0.66374	0.608	0.5787	0.56692	0.53192	0.52236	-0.50847	0.50603	0.49825	0.475	-0.48917	-0.4843	-0.47565	0.46821	0.47317	0.47071	0.47518	-0.4733	0.48837
							0.93156	0.81352	-0.72613	0.69007	-0.6638	0.60804	-0.57879	0.56798	-0.53353	0.52324	0.50889	-0.50608	0.49836	-0.475	-0.48934	-0.48464	0.47566	-0.46863	-0.47335	-0.47075	-0.47534	-0.47334	0.48877
							0.93298	0.81386	0.72667	0.69019	0.66445	-0.60832	0.57898	-0.5696	0.53359	-0.5233	0.50948	0.50611	0.49843	-0.47506	-0.48937	-0.48487	0.4759	-0.4688	-0.47361	0.47118	0.47656	-0.4737	-0.48923
							0.93509	0.81389	0.72674	0.69033	0.66449	0.60849	-0.57919	-0.56968	-0.53385	-0.52356	-0.5097	0.50622	-0.4987	-0.47526	-0.48987	0.485	0.47596	0.46921	-0.47388	0.47184	-0.47704	0.47396	0.48955
							0.93526	0.81455	0.72676	0.69043	0.6646	-0.60872	0.57969	0.56971	0.53405	0.52369	0.50974	-0.50632	-0.49903	0.47531	0.49	-0.48567	0.47631	0.46928	-0.474	-0.47204	0.47717	-0.47421	0.48988
							-0.93682	0.81459	0.72721	-0.69043	-0.66547	0.60887	0.58039	0.56989	0.53408	0.524	0.5098	0.50639	-0.49987	-0.47558	0.49019	0.48576	0.47634	-0.46933	0.47463	0.47248	-0.47752	-0.47548	0.49037
							0.93706	0.8147	-0.72735	0.69061	0.66552	-0.61034	0.58044	-0.57042	0.53445	-0.52406	0.51022	-0.50653	0.50001	0.47572	-0.49043	-0.4863	0.47647	0.46946	-0.47486	0.47259	-0.4781	-0.47559	0.49062
							0.93781	0.81657	0.72801	0.6908	0.66557	-0.61078	-0.58116	0.57178	-0.53458	-0.5243	0.51034	-0.5068	0.50107	0.47659	-0.49045	0.48663	0.47657	0.47011	-0.47624	0.47265	0.47817	0.47566	0.49066
							0.93835	0.81711	0.72941	0.69123	-0.66575	-0.61108	0.58144	0.57186	-0.53599	-0.52569	0.51036	-0.50743	-0.50118	0.47688	-0.49057	0.48665	0.47662	0.47029	0.47647	-0.47273	0.47828	-0.47597	0.49119
							0.93921	0.81786	0.72946	0.69173	-0.66684	0.61149	-0.58169	-0.57222	-0.53603	0.52602	-0.51053	-0.50775	0.5013	0.4771	0.49066	-0.48677	0.47686	0.4705	0.47665	0.47312	0.47932	-0.47613	0.49224
							0.94008	0.81799	0.72969	-0.69186	0.66734	-0.61228	0.5818	0.57241	-0.53608	0.52603	0.51125	-0.50778	-0.50183	-0.47739	-0.49085	0.48702	-0.47693	0.4709	0.47701	-0.47334	-0.47955	0.47623	-0.49244
							0.94021	-0.81878	-0.72972	0.69241	-0.6679	0.61231	-0.58222	0.57251	0.53685	-0.52626	-0.51142	-0.50808	-0.50211	-0.47756	0.49147	-0.48725	0.47702	0.47123	0.47705	0.47367	-0.47972	0.47648	0.49315
							0.94221	0.81928	0.72974	0.69297	0.66878	0.61305	0.58251	-0.57251	0.53719	0.52636	0.51143	-0.50812	-0.50221	0.47783	-0.49162	-0.48868	0.47765	0.47164	0.47779	-0.47396	0.48025	0.47712	-0.49315
							0.94466	0.82049	0.72982	0.69472	0.67047	-0.61382	0.58267	0.57315	0.53776	-0.52649	0.51159	-0.50815	-0.50285	-0.47804	0.49239	-0.4887	-0.4786	-0.47167	0.47804	-0.4741	0.48079	0.47815	0.49323
							0.94742	0.82121	0.73043	0.69509	0.67054	0.6141	-0.58379	-0.57337	0.53865	0.52688	-0.51224	-0.50855	0.50302	-0.47821	0.49248	-0.48874	-0.4787	-0.47171	0.47833	0.47426	-0.48089	0.47828	-0.49334
							0.94896	-0.8215	0.73052	0.69529	-0.67059	0.61456	-0.58406	0.57504	0.5391	0.52719	-0.51227	0.50909	0.50306	0.47829	-0.49262	0.48886	-0.47946	0.47235	0.47844	-0.47448	0.48105	0.47834	0.49391
							0.94949	0.82212	0.73085	0.6957	0.67101	0.6147	0.58427	0.57517	0.53934	0.52723	0.5125	-0.50927	0.50336	-0.47878	-0.49265	-0.48986	0.48007	-0.47267	0.4789	0.47471	-0.48124	0.47904	0.49448
							0.95018	0.82355	0.73216	-0.6961	-0.67108	0.6148	0.5844	-0.57539	-0.53947	0.52747	-0.51254	-0.50928	-0.50342	0.47945	0.49267	-0.48986	-0.48053	-0.47273	-0.47947	0.47506	-0.48132	-0.47914	0.49488
							0.95142	0.82459	0.73291	0.69626	-0.67148	-0.61483	-0.58469	0.57562	0.53956	-0.52782	0.51297	0.50986	0.50412	-0.47945	-0.49322	-0.48997	0.48134	0.47297	-0.47948	0.47573	0.48161	0.47917	0.49559
							0.95355	0.82479	0.73332	0.69735	0.67197	0.6151	0.58489	0.57582	0.53974	0.52793	0.51303	0.5099	0.5043	-0.48005	0.4934	-0.49041	0.48203	-0.47316	0.4796	-0.47581	-0.48166	-0.47923	-0.49644
							0.95478	0.8259	-0.73364	-0.69752	-0.67263	0.61537	0.58517	0.57605	-0.53992	-0.52808	0.51348	-0.51009	-0.50443	0.48007	-0.49358	-0.49046	0.48211	0.4735	0.48027	-0.47584	-0.48172	0.47926	0.49664
							0.95805	0.82709	-0.73364	0.69824	0.67278	0.61548	-0.58531	0.57643	0.54	-0.52811	0.51377	-0.51035	-0.50475	-0.48008	0.49417	0.49062	0.48232	-0.47383	0.48042	-0.47584	-0.48208	0.47936	-0.49675
							0.95922	0.82808	0.73395	0.69916	0.67306	0.61594	-0.58572	-0.57646	0.54	0.52819	0.51414	0.51044	-0.50475	-0.48054	0.49456	-0.49065	0.48308	-0.47393	0.48065	-0.47712	0.4822	0.47937	-0.49687
							0.96015	0.82851	0.73448	-0.69934	0.6736	0.61596	0.58592	-0.57652	-0.54023	0.52825	0.5144	0.51099	0.5052	0.48067	0.49526	0.49066	-0.48363	0.47397	-0.48111	-0.47725	-0.48261	0.47939	-0.49703
							0.96057	0.82946	-0.73457	0.70122	0.67438	-0.61646	-0.58616	-0.57667	0.54069	0.52838	-0.51561	0.51141	-0.50558	0.48071	0.49619	-0.49067	0.48412	-0.47397	-0.48112	-0.47734	-0.48334	0.47951	-0.49707
							0.96086	0.82979	0.7346	0.70156	-0.67461	0.61725	-0.58691	-0.57678	0.54104	0.52856	-0.51564	-0.51161	-0.50573	0.48085	0.49625	0.4911	0.48453	-0.47422	-0.48116	0.47759	0.48371	0.47968	0.4971
							0.96412	0.83071	-0.73478	0.70156	0.67467	0.61799	0.58796	-0.57787	0.54119	-0.52859	0.51567	0.51194	0.506	0.48121	0.49634	-0.49155	-0.48487	0.47451	-0.48133	0.47803	0.48398	-0.48044	-0.49714
							0.96543	0.83122	0.73484	-0.70168	0.67488	-0.61811	0.58838	0.57877	-0.54141	-0.5287	-0.51648	-0.51247	0.50612	-0.48177	-0.4964	-0.49203	0.48663	0.47479	-0.48154	0.47819	0.48405	0.48083	0.4974
							0.96968	0.83141	0.73507	0.70224	0.6749	-0.61825	-0.58874	-0.57878	0.54146	0.52887	0.51673	0.51276	-0.50613	-0.48213	0.49642	0.49221	0.48685	-0.47484	-0.48212	0.47851	-0.48442	0.48086	-0.49817
							0.97555	0.83277	0.73522	0.70254	0.67501	0.61858	-0.58884	0.57883	0.54193	0.52898	-0.517	-0.51284	-0.50651	0.48222	0.49648	0.49253	-0.48745	-0.47509	-0.48254	-0.47854	-0.48481	0.48171	0.49863
							0.97713	0.83282	0.73522	-0.70301	0.67512	0.61891	-0.58934	-0.57956	-0.54212	-0.53055	-0.51729	0.51285	0.50727	-0.48248	0.4973	0.49271	-0.48808	0.47624	-0.48282	-0.47855	-0.48491	-0.48216	0.4988
							0.98033	0.8334	0.73529	0.70302	-0.67536	0.61905	-0.5897	0.57965	-0.54259	0.53057	0.51769	0.51303	-0.50765	0.48291	0.49781	-0.49285	-0.48827	0.47636	0.48305	-0.47864	0.48492	-0.48269	-0.49915
							0.98101	0.83447	0.73583	0.70575	0.67543	0.61993	0.58984	0.58003	0.54286	-0.53074	0.51792	-0.51303	-0.50791	-0.48313	0.49792	-0.49292	-0.48848	-0.47654	-0.48337	0.47895	-0.48555	-0.48271	0.4992
							0.98295	0.83476	0.73605	0.70593	0.67551	-0.62056	0.59003	-0.58025	-0.54304	0.53136	-0.51885	0.51317	-0.50803	-0.4839	0.4981	-0.49307	-0.48876	0.47669	-0.48345	-0.48009	-0.48562	0.48276	-0.49948
							0.98878	0.83476	0.73625	-0.70678	0.67684	-0.62102	0.59079	0.58051	0.54376	-0.53144	-0.51933	0.51331	0.50825	0.4841	-0.49836	-0.49334	-0.48877	0.47726	0.48355	0.48011	-0.486	-0.48306	-0.49967
							0.98908	0.83565	0.73627	0.70714	-0.67684	-0.62125	0.59093	0.58077	-0.54381	0.53179	-0.51957	-0.51334	0.50827	-0.48421	0.49902	-0.4935	-0.48906	-0.47734	0.48363	0.48031	-0.48607	-0.48341	-0.4997
							0.98914	0.8362	-0.73637	0.70716	0.67693	0.62194	-0.59156	0.5808	0.54395	0.5319	0.51963	-0.51334	0.50846	0.48459	-0.49906	-0.49419	0.48907	0.47736	-0.48368	0.48032	0.48613	0.48369	0.50029
							0.99418	-0.8376	-0.73642	0.70739	0.67715	0.6227	-0.59315	0.58126	0.54396	0.53203	-0.52004	0.51357	0.50909	-0.48537	0.49921	0.49489	0.48922	-0.47776	-0.48388	0.48043	-0.48621	0.48378	0.5003
							0.9975	-0.83781	0.73676	-0.70754	0.6775	0.62308	-0.59344	0.58133	0.54407	-0.53215	-0.5202	-0.51358	-0.50957	-0.48537	0.5001	0.49504	0.48923	0.47879	0.48392	0.48047	0.48663	0.48409	0.50043
								0.83805	0.73683	-0.70756	0.6781	0.62361	-0.59363	-0.58231	0.54422	-0.53307	0.52071	0.51384	0.5098	0.4856	-0.50012	0.49516	-0.48935	-0.47961	0.4844	-0.48082	-0.48684	0.48496	-0.50066
								-0.8392	0.73719	0.70866	-0.67847	0.62386	0.59365	0.58232	0.54432	0.53317	-0.52096	-0.51387	0.51059	0.48574	-0.50026	-0.49528	-0.48992	0.47976	0.48453	-0.48093	0.48685	0.48522	-0.5007
								-0.83939	0.73723	-0.70908	-0.67865	0.62418	0.59418	0.58381	0.54445	0.53329	0.52114	0.51388	0.51161	-0.48663	0.50057	-0.49616	-0.49034	-0.47986	-0.48453	-0.4816	-0.48688	0.48553	-0.50075
								0.83998	0.73723	0.70914	0.67868	-0.62601	0.5943	0.58406	0.54495	0.53342	0.52153	-0.51404	-0.51219	-0.48678	-0.50104	-0.49641	-0.49037	-0.48007	0.48454	-0.48251	-0.48703	0.48559	0.50095
								-0.84024	-0.73789	-0.7096	-0.67948	-0.62633	0.59487	-0.58453	-0.54513	-0.53402	-0.52179	-0.51431	-0.51293	-0.4869	-0.50132	0.49648	0.49044	0.48008	0.48481	0.48258	-0.48713	-0.48569	-0.5013
								0.84032	0.73801	0.70974	0.6796	-0.62636	-0.59529	0.58477	0.54529	-0.53451	-0.52184	0.51446	-0.51309	0.48733	-0.50139	0.49665	0.49058	-0.48049	0.48485	-0.48274	0.48739	-0.48575	-0.50138
								0.84067	0.73859	0.71046	0.6801	0.6267	0.59535	0.58553	-0.54535	0.53468	0.52235	-0.51477	0.51353	-0.48738	-0.5016	-0.49684	-0.49093	0.48113	-0.48487	0.48313	-0.48764	-0.48628	0.50157
								0.84185	-0.73916	0.71072	0.6801	0.62672	0.59542	0.58555	-0.54539	0.53494	0.52302	-0.51479	-0.51425	0.48757	0.50229	0.49714	0.49209	0.48133	-0.48499	-0.4838	0.48791	0.4865	0.50202
								0.84216	0.73923	0.71135	-0.68074	0.62776	-0.59643	0.58574	0.5457	0.53541	0.52336	-0.5152	-0.5145	0.48775	0.50264	0.49777	0.49222	-0.48146	-0.4853	0.48402	0.48825	-0.48694	0.50215
								0.84394	0.74074	0.71149	0.68102	0.62792	0.59708	0.58579	0.54583	-0.53562	0.52365	-0.51521	0.51523	-0.48823	0.50287	0.49876	0.49231	-0.48147	-0.48538	-0.48415	0.48846	0.48712	-0.50217
								0.84416	0.74108	-0.71196	0.68114	0.6282	0.59713	-0.58851	-0.54609	0.53591	0.5246	0.51567	0.51528	-0.48832	0.50374	-0.49891	-0.49249	0.48155	0.48544	-0.4843	-0.48864	0.48762	-0.50221
								0.84526	-0.74111	-0.71211	0.68126	-0.62821	-0.59722	0.58889	0.54628	0.53686	-0.52465	0.51607	0.51572	-0.48883	0.50378	-0.49899	-0.49302	0.4817	-0.486	0.48453	0.48917	-0.48774	0.50254
								-0.84563	0.74116	0.71219	-0.68212	0.6283	0.59753	0.58904	-0.54631	-0.53689	-0.52477	-0.51609	-0.51626	-0.48909	-0.50392	-0.49958	0.49336	-0.48226	-0.48607	0.48497	0.48941	0.48832	0.50286
								0.84643	0.74252	0.71243	0.68235	-0.62845	0.5977	-0.58924	0.54668	0.53758	-0.52524	-0.51652	-0.5167	0.48935	0.50401	-0.49962	0.49474	-0.48305	0.48609	-0.48525	-0.48947	-0.48859	-0.5038
								0.84663	0.74301	-0.71248	-0.68254	0.62873	0.59795	0.58964	0.54681	0.53764	0.52528	0.51725	-0.51789	0.48952	0.50407	0.50007	0.49474	-0.48308	0.48656	-0.48536	-0.4897	0.48878	-0.50431
								0.84982	0.74321	0.71288	0.68268	-0.62887	0.59807	0.58985	0.54695	0.53772	-0.52528	0.5177	0.51809	0.48957	0.50407	0.50047	-0.49486	0.4833	0.48672	0.48544	-0.4898	0.48879	0.50478
[truncated: 1,384 more rows]
