# Supplementary material for: Nanoscale architecture and coordination of actin cores within the sealing zone of human osteoclasts
Source: eLife. 2022 Jun 21;11:e75610. doi: 10.7554/eLife.75610 (PMC9255968; doi:10.7554/eLife.75610)
Supplement: Figure 4—source data 1. [file elife-75610-fig4-data1.xlsx]

## Sheet: Feuil1
actin
#	For	all	cells	stat	profiles	-	intensity	scaled,	transversal	direction
					268.509	350.659	360.712	352.46	319.42	258.311	296.569	288.272	277.826	300.995	315.461	339.836	366.326	439.195	523.279	629.134	753.765	884.238	936.824	986.891	1000	980.216	935.281	864.544	738.421	613.266	485.779	391.584	327.234	309.359	293.56	294.87	292.437	299.816	331.641	336.81	324.463	324.447	332.061	343.974	349.461
actinin
#	For	all	cells	protein	stat	profiles	-	intensity	scaled,	transversal	direction
					455.467	659.679	604.517	638.813	556.279	553.455	616.112	657.274	628.837	619.677	591.305	630.69	714.399	794.233	806.386	919.831	976.604	990.192	926.261	947.427	935.611	970.146	989.924	1000	959.293	826.412	705.096	665.508	659.174	649.208	574.91	585.54	620.547	601.935	626.967	587.46	610.569	573.522	592.645	627.904	667.213
actin
#	For	all	cells	stat	profiles	-	intensity	scaled,	transversal	direction
					538.278	502.936	451.915	412.973	426.533	389.9	406.673	395.578	375.253	391.569	379.036	400.35	430.306	493.253	591.402	676.505	748.608	849.743	937.043	989.911	1000	959.032	930.241	853.655	747.856	664.617	537.531	427.86	371.128	385.584	403.123	363.634	346.093	341.234	339.499	331.517	338.455	369.406	400.805	378.366	413.009
cortactin
#	For	all	cells	protein	stat	profiles	-	intensity	scaled,	transversal	direction
					611.668	620.378	632.715	648.102	640.306	613.172	633.953	620.489	584.786	581.241	601.556	650.473	696.385	768.385	797.814	840.684	914.366	944.12	984.739	1000	987.633	947.236	960.758	935.748	857.244	756.954	684.418	619.98	651.766	608.998	727.844	575.263	592.866	629.064	649.436	690.128	620.999	636.088	621.271	638.934	620.767
					actin
					#	For	all	cells	stat	profiles	-	intensity	scaled,	transversal	direction
					382.405	360.415	392.289	415.164	378.843	418.05	441.462	446.544	410.24	435.434	445.12	470.011	466.815	510.467	560.777	653.244	764.527	851.156	912.906	972.977	1000	960.087	903.106	826.298	744.575	658.875	564.919	531.127	490.572	455.13	445.86	439.767	445.181	444.947	471.94	471.946	476.51	487.19	522.685	520.706	536.911
					flnA
					#	For	all	cells	protein	stat	profiles	-	intensity	scaled,	transversal	direction
					837.69	833.364	867.229	881.312	734.742	872.083	958.256	917.201	781.275	872.566	767.719	758.27	697.361	655.941	519.385	460.88	385.511	327.637	321.816	319.007	320.983	356.097	402.009	472.944	570.01	711.689	749.598	926.521	868.266	1000	932.796	973.514	839.525	983.19	883.692	798.243	884.085	848.842	829.205	795.755	781.595
					actin
					#	For	all	cells	stat	profiles	-	intensity	scaled,	transversal	direction
					452.045	443.803	464.619	454.403	375.977	473.5	481.845	502.74	531.062	538.434	557.411	566.735	591.828	614.093	643.258	705.173	750.438	824.615	896.658	969.501	1000	983.165	935.675	874.542	833.959	763.956	704.417	678.638	660.477	657.341	630.855	626.264	604.479	591.698	586.222	586.71	592.747	595.105	589.334	589.777	581.908
					vinculin
					#	For	all	cells	protein	stat	profiles	-	intensity	scaled,	transversal	direction
					754.505	789.619	830.96	842.532	790.051	887.533	870.865	834.124	804.292	862.332	853.471	850.41	798.984	835.97	815.68	752.63	728.302	612.857	621.89	637.448	660.012	678.881	708.117	723.623	753.291	763.78	747.091	738.611	838.551	768.124	879.693	881.749	904.928	947.781	906.848	895.678	872.302	914.817	944.924	983.159	1000
Mediane Actine (4cell)
					417.225	402.109	422.102	414.068	377.41	403.975	424.067	421.061	392.746	413.502	412.078	435.181	448.56	501.86	576.09	664.874	752.101	850.45	924.865	979.934	1000	970.152	932.761	859.099	746.215	661.746	551.225	479.494	430.85	420.357	424.491	401.7	395.637	393.091	405.719	404.378	407.482	428.298	461.745	449.536	474.96
