# Supplementary material for: Nanoscale architecture and coordination of actin cores within the sealing zone of human osteoclasts
Source: eLife. 2022 Jun 21;11:e75610. doi: 10.7554/eLife.75610 (PMC9255968; doi:10.7554/eLife.75610)
Supplement: Figure 5—source data 2. [file elife-75610-fig5-data2.xlsx]

## Sheet: Feuil1
		zone de gauche		zone de droite			norm: max à 255		zone de gauche		zone de droite
	time	actine	pax	actine	pax		max act		actine	pax	actine	pax
	0	119.392	65.5992	146.062	111.606		159.885		190.418	140.907	232.954	239.731
	9	122.107	65.8184	150.628	114.816				194.747	141.378	240.236	246.625
	18	112.597	61.2861	147.68	114.331		max pax		179.58	131.643	235.534	245.584
	27	109.81	56.5986	147.322	111.217		118.715		175.135	121.574	234.964	238.894
	36	103.564	51.4094	132.496	109.818				165.173	110.427	211.317	235.889
	45	101.796	54.0013	134.873	115.502				162.354	115.995	215.108	248.099
	54	87.3161	48.338	150.896	118.715				139.26	103.83	240.662	255
	63	77.5681	40.2093	159.885	115.756				123.713	86.3697	255	248.643
	72	78.6144	41.4388	139.284	111.816				125.382	89.0107	222.143	240.181
	81	86.0814	48.7867	129.182	112.703				137.291	104.794	206.031	242.087
	90	98.7483	52.0235	131.618	110.105				157.493	111.747	209.916	236.505
	99	114.565	53.9481	139.574	111.014				182.72	115.881	222.605	238.458
	108	125.577	62.6372	138.045	101.717				200.283	134.545	220.167	218.488
	117	129.75	63.2553	122.579	97.4064				206.938	135.873	195.501	209.229
	126	134.491	64.4117	114.536	95.7685				214.498	138.357	182.672	205.711
	135	128.625	63.7804	108.501	100.276				205.143	137	173.048	215.394
	144	122.97	66.6749	122.644	97.1048				196.124	143.218	195.604	208.581
	153	118.938	66.5321	119.651	97.8733				189.693	142.911	190.831	210.232
	162	114.523	65.4577	111.349	108.429				182.653	140.603	177.589	232.906
	171	115.61	64.4607	109.107	111.273				184.385	138.462	174.014	239.015
	180	117.446	57.3056	122.865	113.773				187.314	123.092	195.957	244.385
	189	110.958	51.8525	140.71	108.974				176.966	111.379	224.418	234.077
