# Supplementary material for: Nanoscale architecture and coordination of actin cores within the sealing zone of human osteoclasts
Source: eLife journal article supplement (doi:10.7554/elife.75610), 2022-06-21

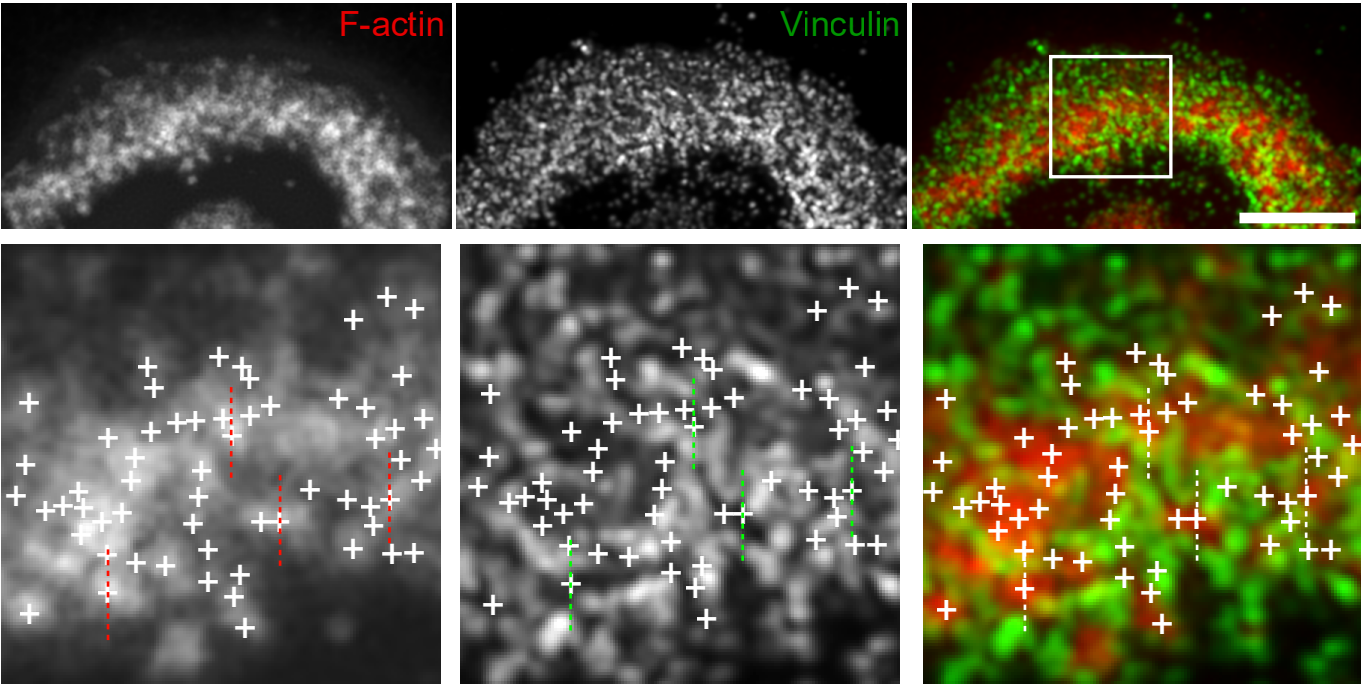

Use of Find Edges tool in ImageJ  
Spatial derivation of the  
Fluorescence signal

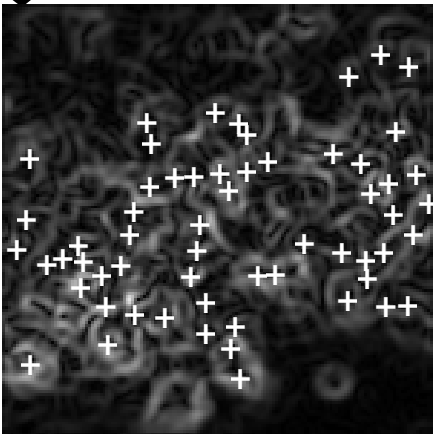

Measuring the diameter of each actin core

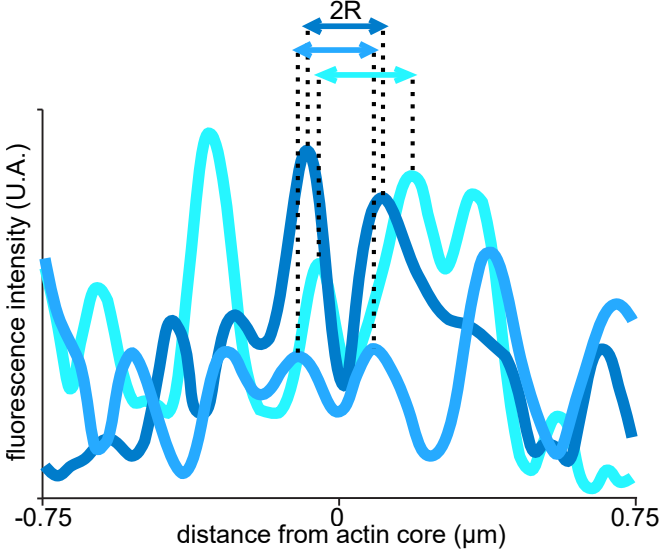

Normalizing the extracted actin-associated and protein-associated fluorescence signals:  
-extension or shrinkage of each side of the curves, along the abscissa axis, depending on the previous results on signals extracted from the Find Edges image;  
-extension or shrinkage of the whole curve, along the ordinate axis, so that all curves share the same minimum value and the same maximum value.

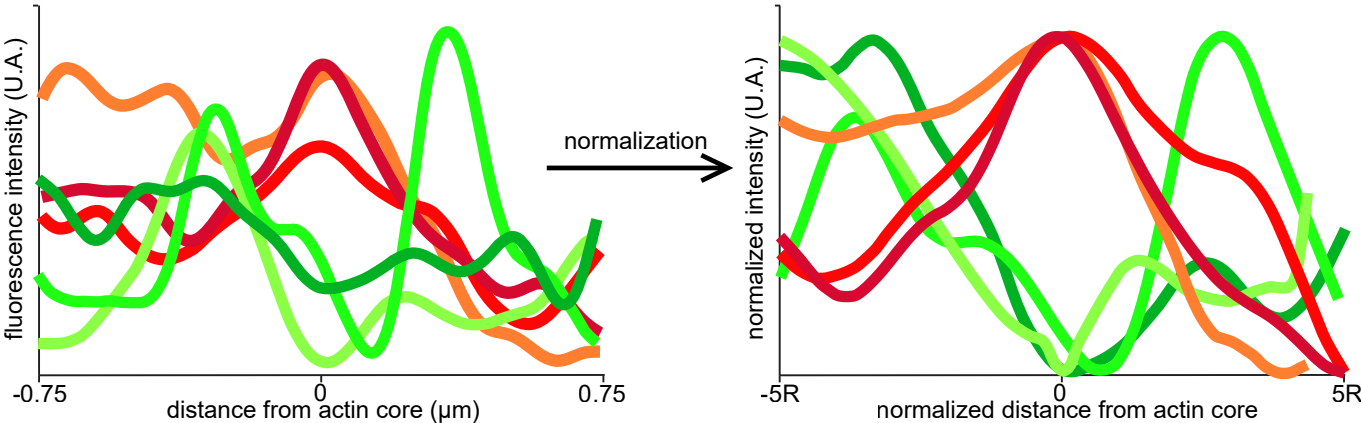

Supplement: supp [file elife-75610-supp-v2.zip]
