# Supplementary figures and images for: Nanoscale architecture and coordination of actin cores within the sealing zone of human osteoclasts
Source: eLife journal article supplement (doi:10.7554/elife.75610), 2022-06-21

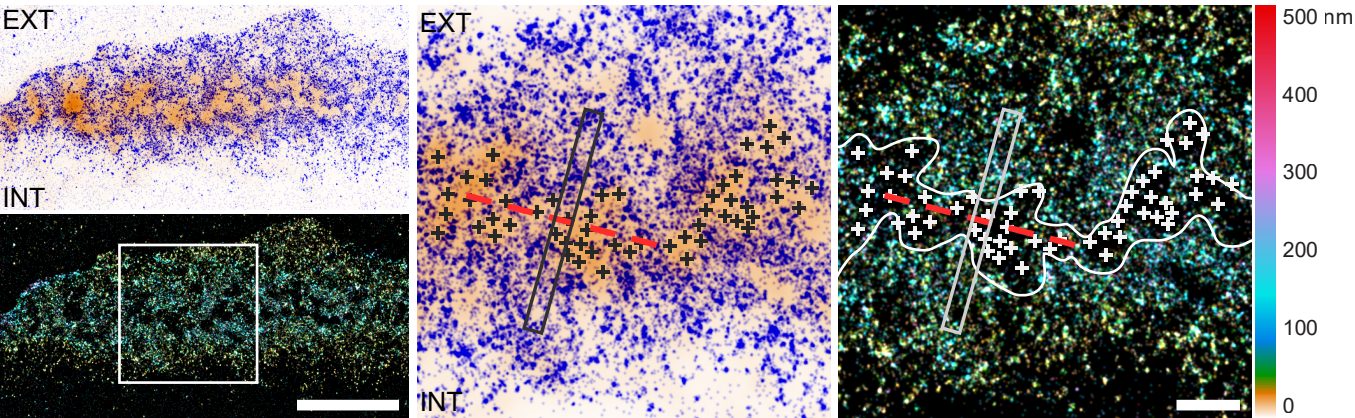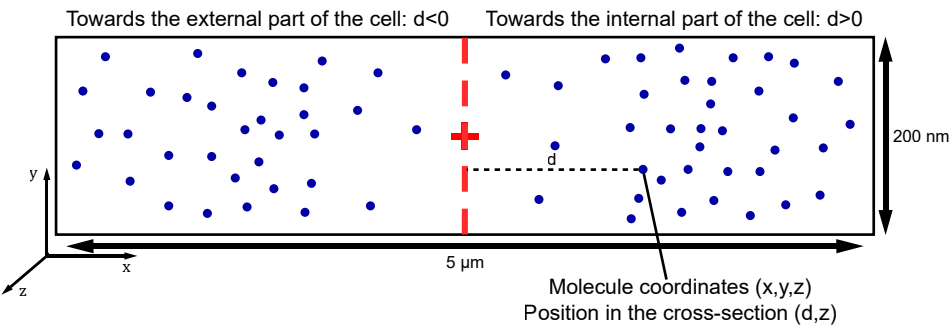

Supplement: supp [file elife-75610-supp-v2.zip]

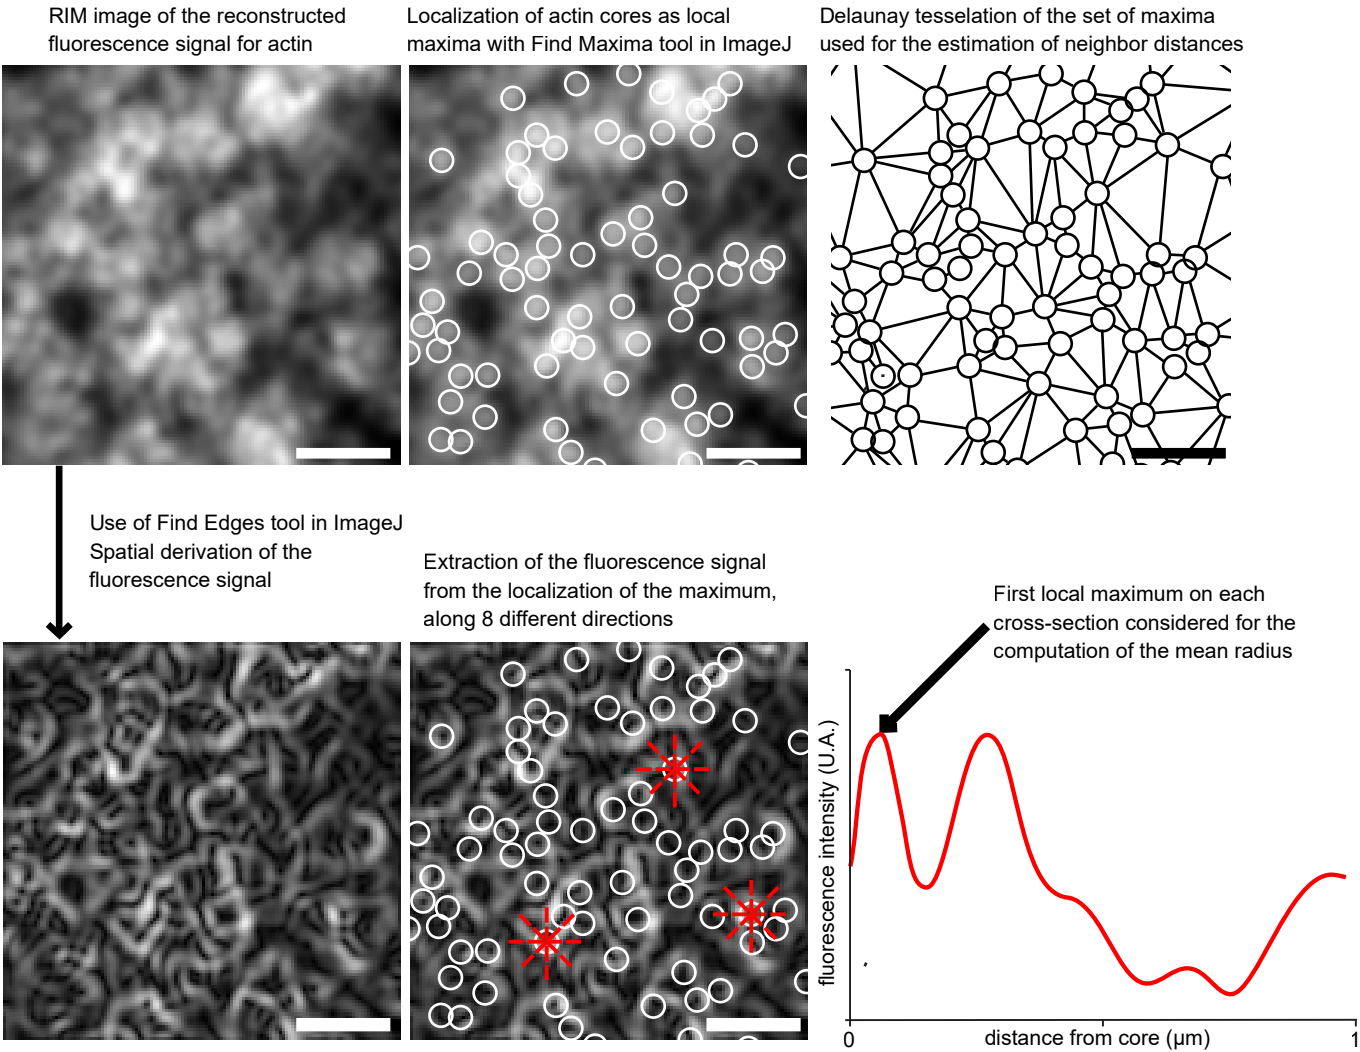

Supplement: supp [file elife-75610-supp-v2.zip]

Cortactin F-actin

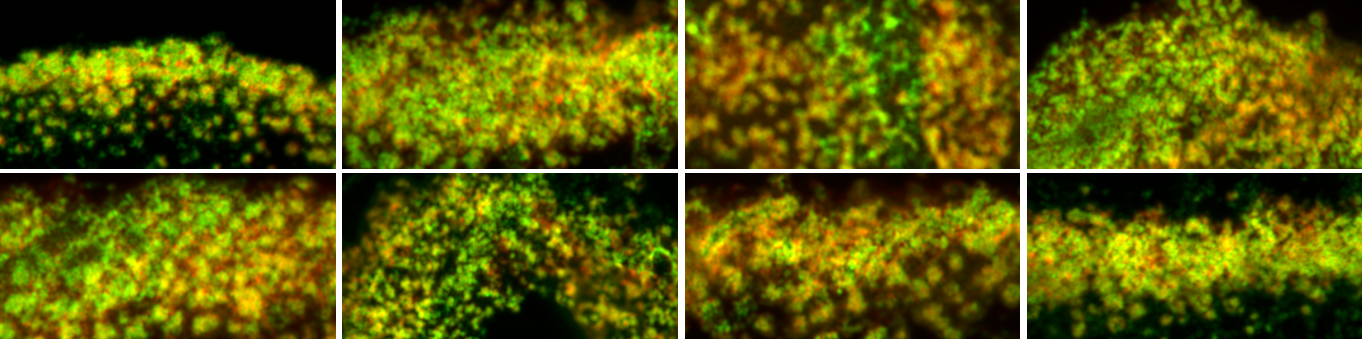

Actinin-1 F-actin

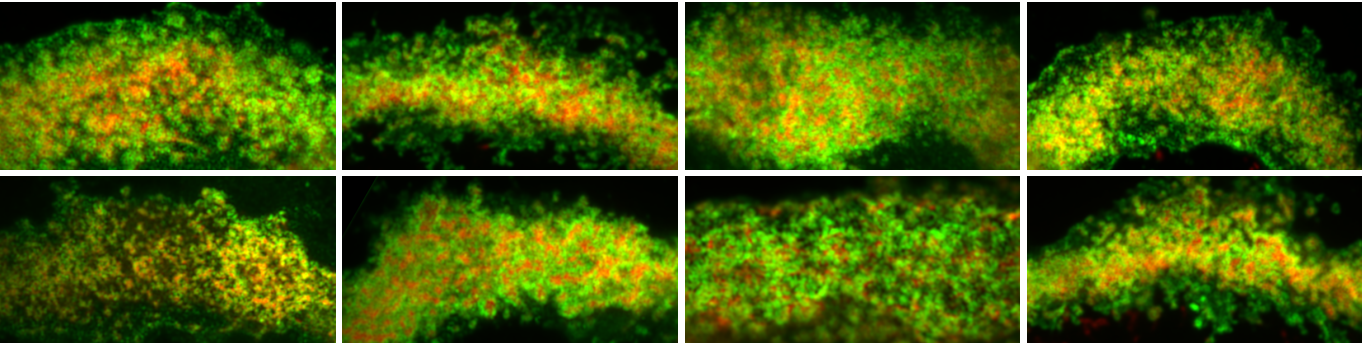

Filamin-A F-actin

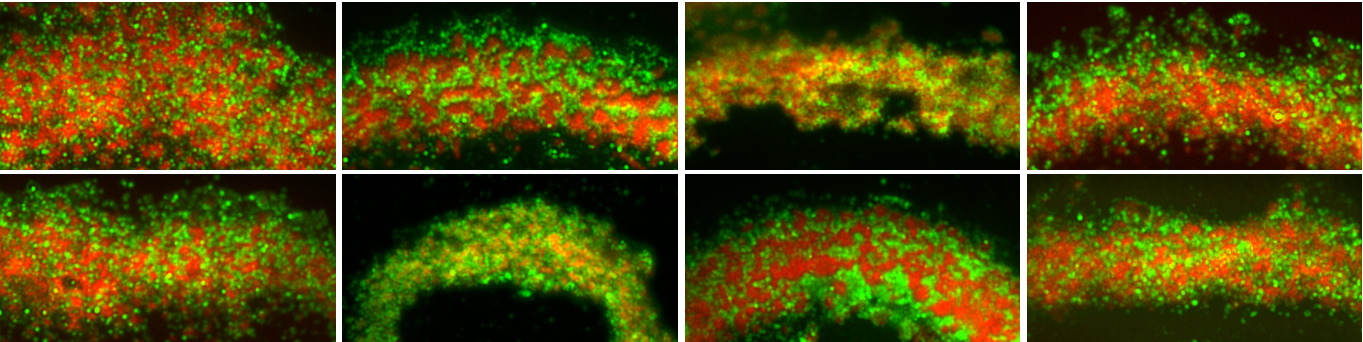

Vinculin F-actin

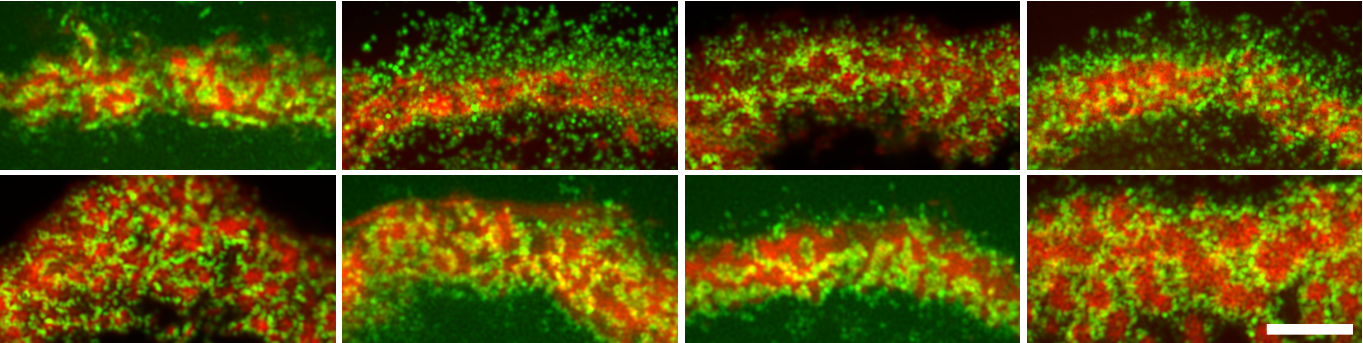

Supplement: supp [file elife-75610-supp-v2.zip]

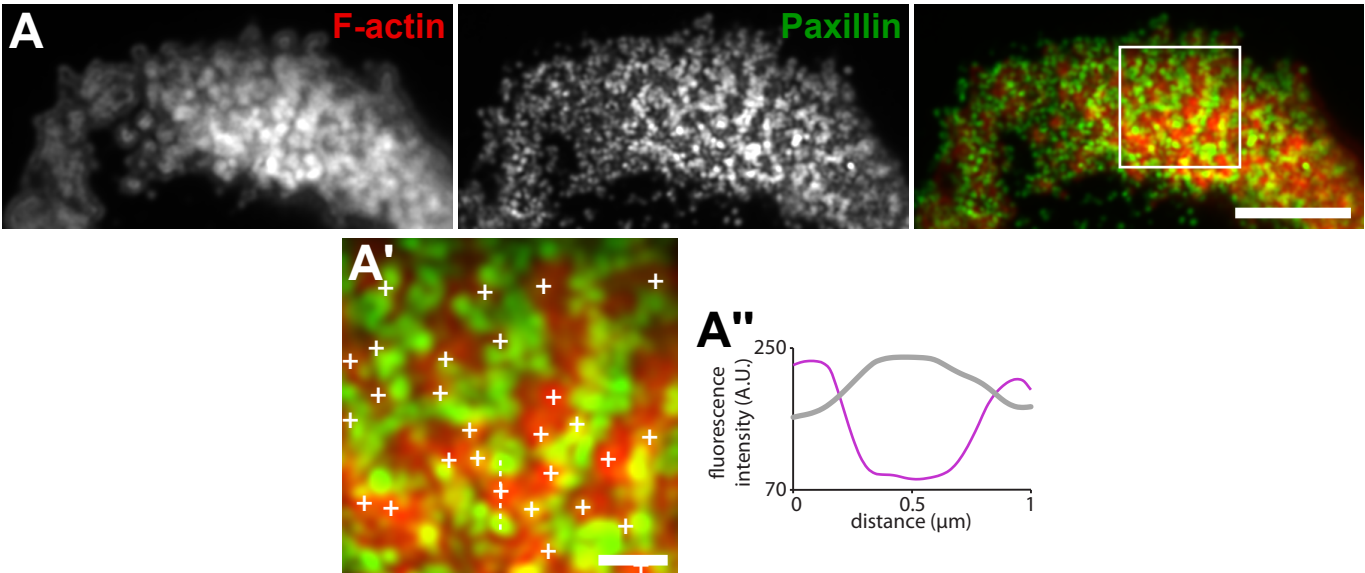

**B** Paxillin F-actin

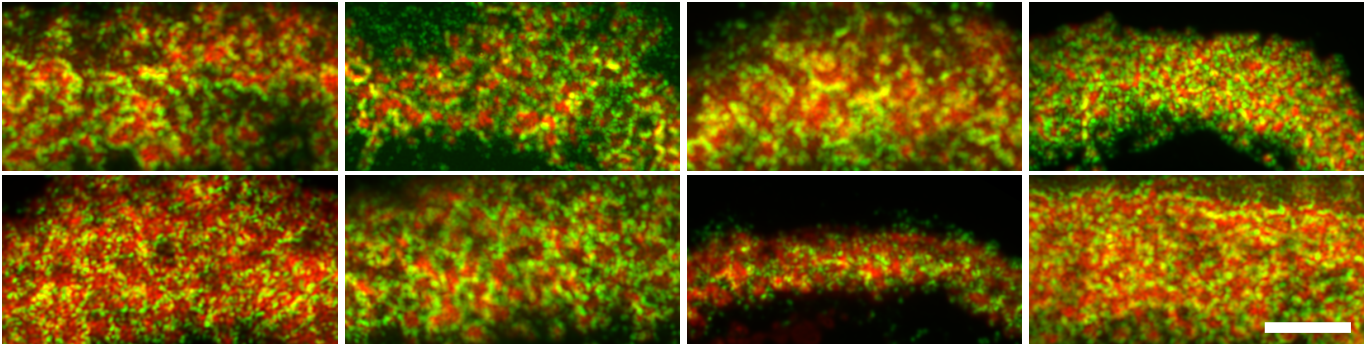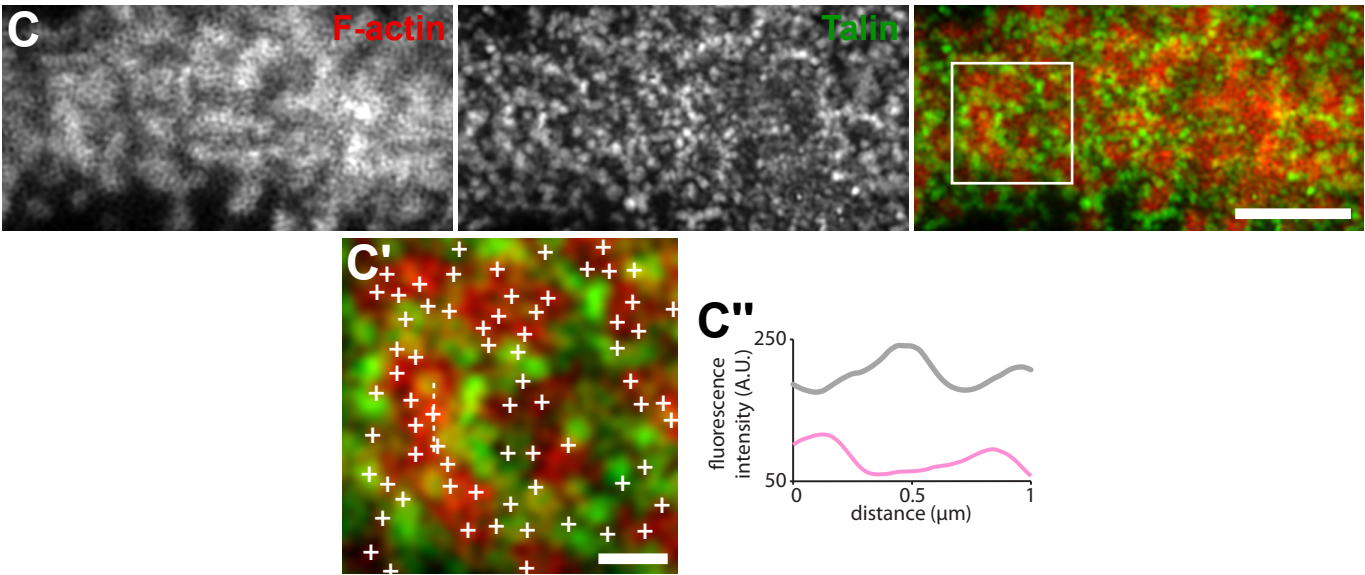

**D** Talin F-actin

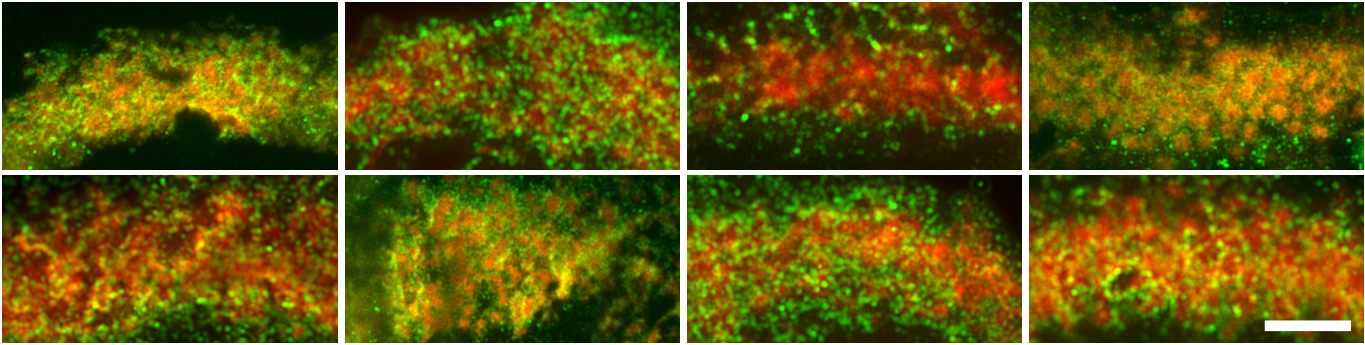

Supplement: supp [file elife-75610-supp-v2.zip]

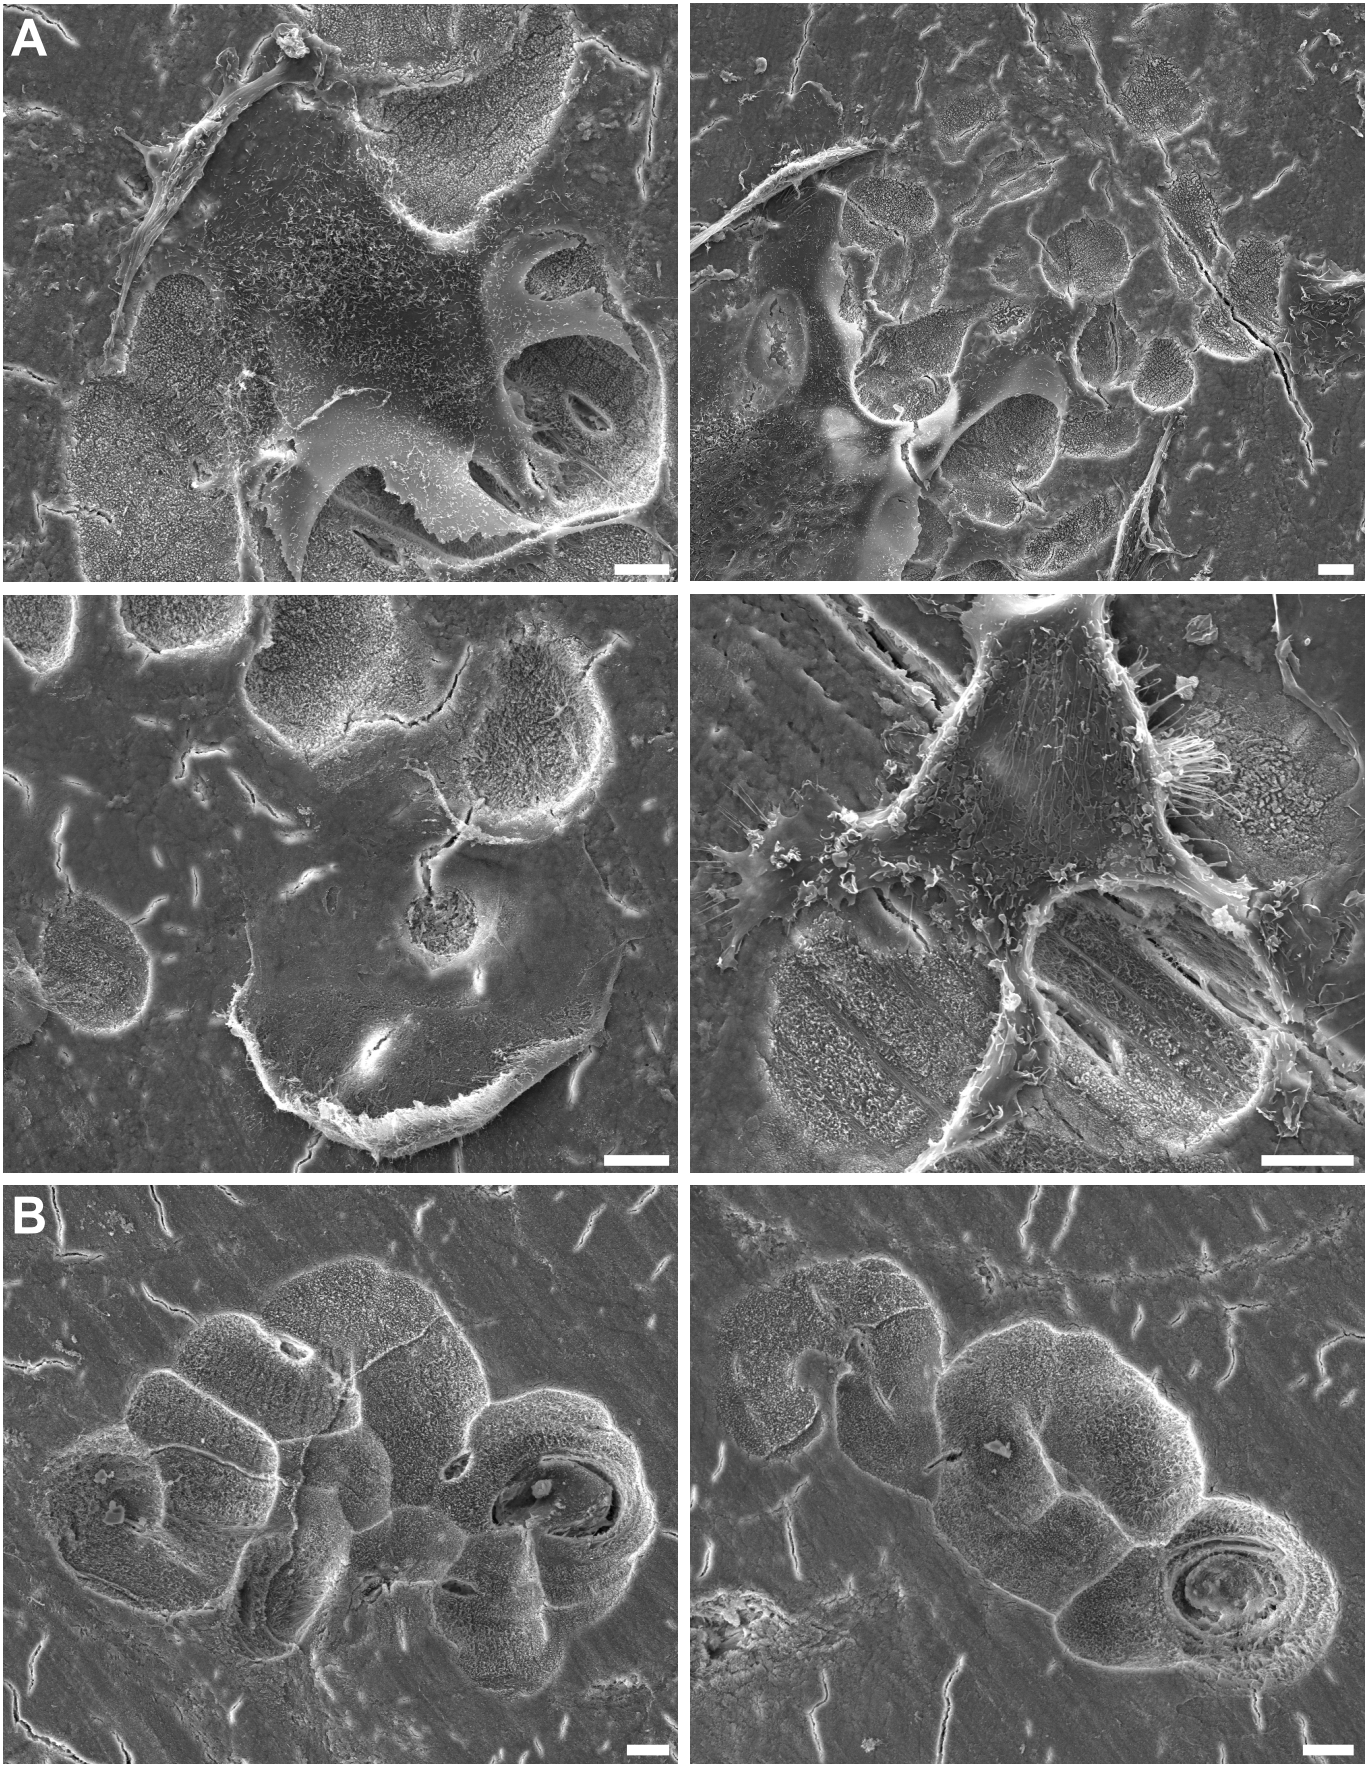

Supplement: supp [file elife-75610-supp-v2.zip]

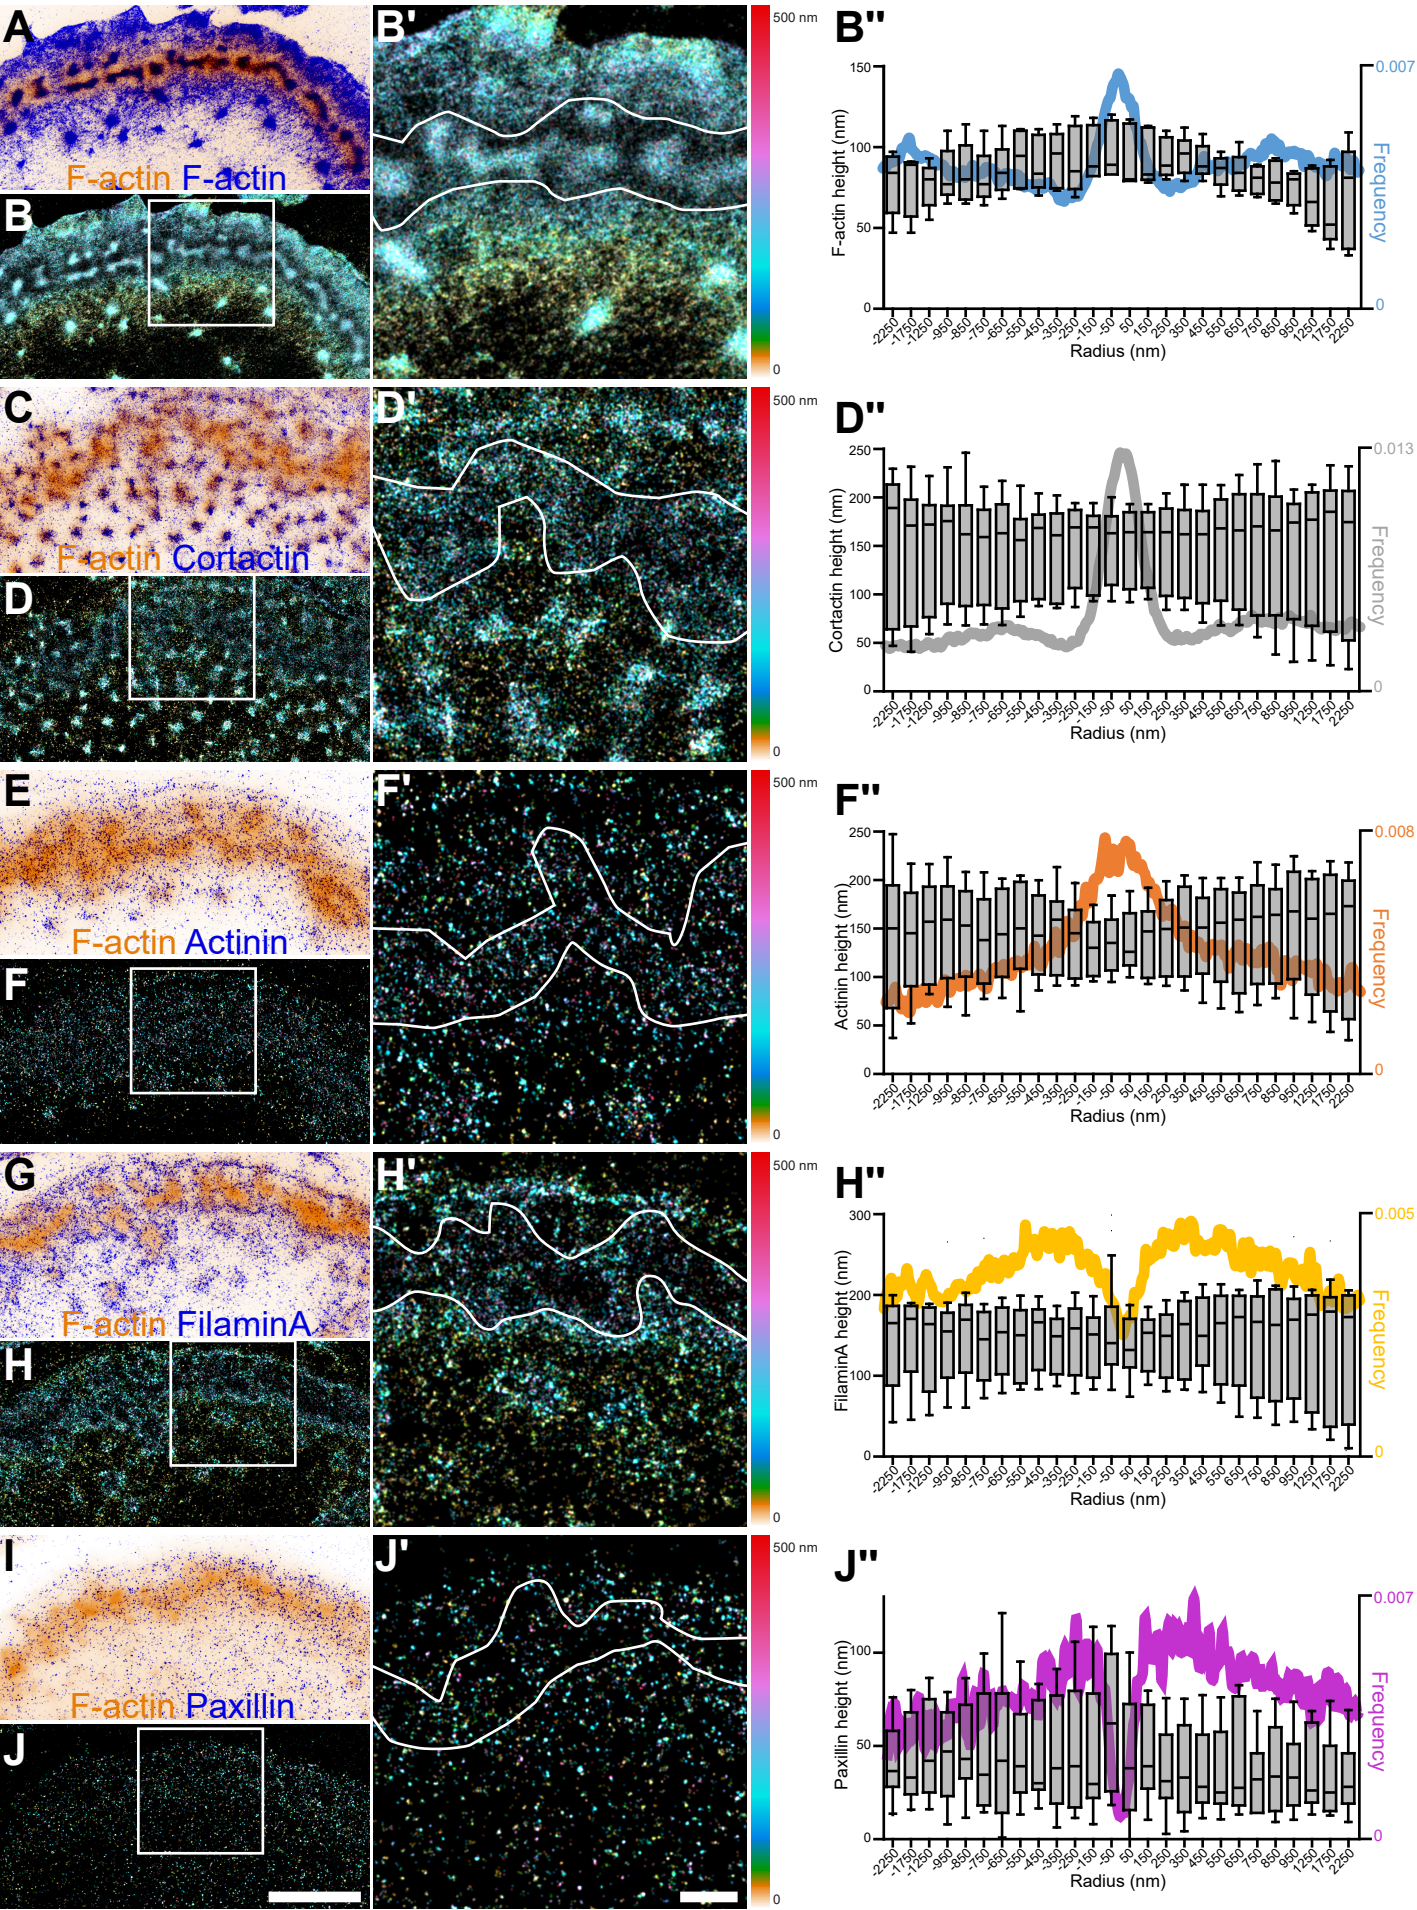

Supplement: supp [file elife-75610-supp-v2.zip]

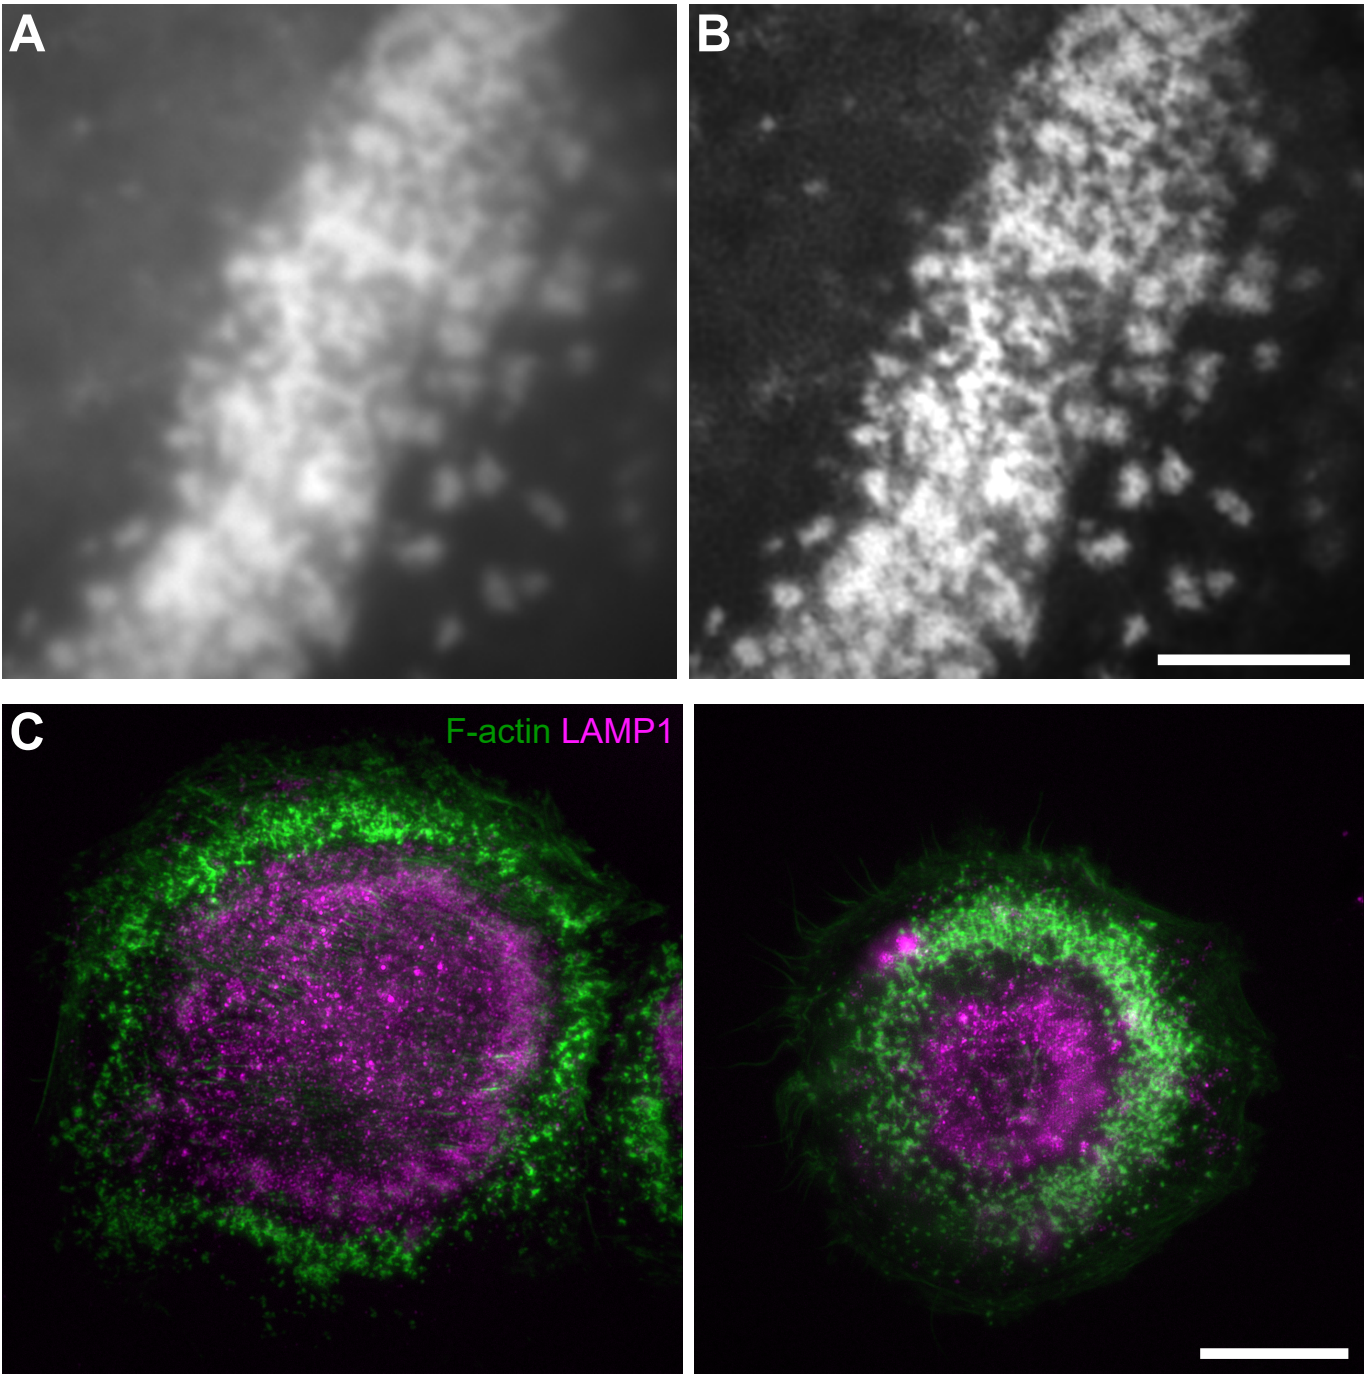

Supplement: supp [file elife-75610-supp-v2.zip]
